# Supplementary material for: Comparison of Different Label-free Techniques for the Semi-absolute Quantification of Protein Abundance
Source: Preprints.org preprint supplement (doi:10.20944/preprints202112.0212.v1), 2021-12-13
Supplement: Supplementary file 1 [file FileS1_Xtandempipeline_identification.xlsx]

## Sheet: compar_Spectra
Supporting information File S-1. X!Tandempipeline results of the identified proteins
Combined mode of samples: standard (T2), high temperature (T3), osmotic shock (T4), low pH (T5), anaerobic (T6) and three replicates for each condition (A, B, C). Plus 6 bulk samples (Bulk, A-F)
Parameters of X!TandemPipeline :		Results from X!Tandem Alanine (version 2017.02.01, http://www.thegpm.org/tandem/)
		Parser 3.4.3 developed by PAPPSO platform (http://pappso.inra.fr/bioinfo/)
	Modifications:	Carbamidomethylation of Cys residues = +57.0214
		Oxidation of Met residues = +15.99
	Databases:	S cerevisiae CEN.PK113-7D from : https://www.uniprot.org, september 2017, 5439 protein entries.
		UPS proteins databse from : https://www.sigmaaldrich.com/life-science/proteomics/mass-spectrometry/ups1-and-ups2-proteomic.html, 48 protein entries
		Contaminants database (keratins, BSA... etc)
	Filters:	Filters for the parser X!Tandem : Maximal peptide Evalue to compare and filter proteins : 0.01
		Minimal number of unique peptides to conserve a protein : 1
		Maximal protein log(Evalue) to conserve a protein : -3
Table informations:
	Group ID	The Group to which the protein belongs. All the proteins in a group have at least one peptide in common.
	Sub -Group ID	The Sub-Group to which the protein belongs. All the proteins in a sub-group are identifed with the same valid peptides.
	Top Protein ID	A single reference to the protein in this grouping experiment (unique within a sample in individual mode).
	Protein name	Protein description as it appears in the header of the fastafile.
Group ID	Sub-group ID	Top Protein ID	Protein name	20180802_04_SC_Bulk_A	20180802_06_SC_T2A_A	20180802_08_SC_T3A_A	20180802_10_SC_T4A_A	20180802_12_SC_T5A_A	20180802_14_SC_T6A_A	20180802_16_SC_Bulk_B	20180802_18_SC_T2_B	20180802_20_SC_T3_B	20180802_22_SC_T4_B	20180802_24_SC_T5_B	20180802_26_SC_T6_B	20180802_28_SC_Bulk_C	20180802_30_SC_Bulk_D	20180802_32_SC_T3_C	20180802_34_SC_T5_C	20180802_36_SC_T2_C	20180802_38_SC_T6_C	20180802_40_SC_T4_C	20180802_42_SC_Bulk_E	20180802_44_SC_Bulk_F
d1172	d1172.a1	d1172.a1.a1	Q15843ups|NEDD8_HUMAN_UPS NEDD8 (Chain 1-81) - Homo sapiens (Human)	3	0	0	0	0	0	4	0	0	0	0	0	3	3	0	0	0	0	0	3	3
c124	c124.a1	c124.a1.a1	Q06830ups|PRDX1_HUMAN_UPS Peroxiredoxin 1 (Chain 2-199) - Homo sapiens (Human)	74	0	0	0	0	0	74	0	0	0	0	0	77	74	0	0	0	0	0	81	79
b85	b85.a1	b85.a1.a1	P69905ups|HBA_HUMAN_UPS Hemoglobin subunit alpha (Chain 2-142) - Homo sapiens (Human)	99	0	0	0	0	0	85	0	0	0	0	0	107	106	0	0	0	0	0	100	90
b48	b48.a1	b48.a1.a1	P68871ups|HBB_HUMAN_UPS Hemoglobin subunit beta (Chain 2-147) - Homo sapiens (Human)	144	0	0	0	0	0	148	0	0	0	0	0	141	142	0	0	0	0	0	128	133
c824	c824.a1	c824.a1.a1	P63279ups|UBC9_HUMAN_UPS SUMO-conjugating enzyme UBC9 (Chain 1-158) - Homo sapiens (Human)	7	0	0	0	0	0	5	0	0	0	0	0	8	9	0	0	0	0	0	10	11
c160	c160.a1	c160.a1.a1	P63165ups|SUMO1_HUMAN_UPS Small ubiquitin-related modifier 1 (Chain 1-97, N-terminal GST tag) - Homo sapiens (Human)	67	0	0	0	0	0	61	0	0	0	0	0	70	64	0	0	0	0	0	63	59
c137	c137.a3	c137.a3.a1	P62988ups|UBIQ_HUMAN_UPS Ubiquitin (Chain 1-76, N-terminal His tag) - Homo sapiens (Human)	36	0	0	0	0	0	35	0	0	0	0	0	42	41	0	0	0	0	0	31	34
c192	c192.a1	c192.a1.a1	P62937ups|PPIA_HUMAN_UPS Peptidyl-prolyl cis-trans isomerase A (Chain 1-165, N terminal His tag)- Homo sapiens (Human)	62	0	0	0	0	0	62	0	0	0	0	0	65	51	0	0	0	0	0	52	56
d1369	d1369.a1	d1369.a1.a1	P61626ups|LYSC_HUMAN_UPS Lysozyme C (Chain 19-148) - Homo sapiens (Human)	1	0	0	0	0	0	1	0	0	0	0	0	2	3	0	0	0	0	0	2	2
d1462	d1462.a1	d1462.a1.a1	P55957ups|BID_HUMAN_UPS BH3-interacting domain death agonist (Chain 1-195) - Homo sapiens (Human)	1	0	0	0	0	0	1	0	0	0	0	0	2	1	0	0	0	0	0	2	1
b37	b37.a1	b37.a1.a1	P41159ups|LEP_HUMAN_UPS Leptin (Chain 22-167) - Homo sapiens (Human)	178	0	0	0	0	0	168	0	0	0	0	0	181	177	0	0	0	0	0	148	141
c635	c635.a1	c635.a1.a1	P16083ups|NQO2_HUMAN_UPS Ribosyldihydronicotinamide dehydrogenase [quinone] (Chain 2-231) - Homo sapiens (Human)	14	0	0	0	0	0	15	0	0	0	0	0	13	16	0	0	0	0	0	13	15
c329	c329.a1	c329.a1.a1	P15559ups|NQO1_HUMAN_UPS NAD(P)H dehydrogenase [quinone] 1 (Chain 2-274) - Homo sapiens (Human)	34	0	0	0	0	0	39	0	0	0	0	0	44	35	0	0	0	0	0	36	35
c157	c157.a2	c157.a2.a1	P12081ups|SYHC_HUMAN_UPS Histidyl-tRNA synthetase, cytoplasmic (Chain 1-509, C terminal His tag) - Homo sapiens (Human)	26	0	0	0	0	0	28	0	0	0	0	0	25	26	0	0	0	0	0	31	26
d1524	d1524.a1	d1524.a1.a1	P10599ups|THIO_HUMAN_UPS Thioredoxin (Chain 2-105, N-terminal His tag)- Homo sapiens (Human)	1	0	0	0	0	0	1	0	0	0	0	0	1	2	0	0	0	0	0	1	1
c381	c381.a1	c381.a1.a1	P06732ups|KCRM_HUMAN_UPS Creatine kinase M-type (Chain 1-381) - Homo sapiens (Human)	35	0	0	0	0	0	33	0	0	0	0	0	29	36	0	0	0	0	0	22	30
d1327	d1327.a1	d1327.a1.a1	P06396ups|GELS_HUMAN_UPS Gelsolin (Chain 28-782) - Homo sapiens (Human)	1	0	0	0	0	0	2	0	0	0	0	0	3	2	0	0	0	0	0	2	2
c121	c121.a1	c121.a1.a1	P04040ups|CATA_HUMAN_UPS Catalase (Chain 2-527) - Homo sapiens (Human)	77	0	0	0	0	0	70	0	0	0	0	0	86	80	0	0	0	0	0	74	79
d1941	d1941.a1	d1941.a1.a1	P02787ups|TRFE_HUMAN_UPS Serotransferrin (Chain 20-698) - Homo sapiens (Human)	0	0	0	0	0	0	0	0	0	0	0	0	0	0	0	0	0	0	0	0	1
c964	c964.a1	c964.a1.a1	P02753ups|RETBP_HUMAN_UPS Retinol-binding protein 4 (Chain 19-201) - Homo sapiens (Human)	5	0	0	0	0	0	5	0	0	0	0	0	6	8	0	0	0	0	0	6	5
c412	c412.a1	c412.a1.a1	P02144ups|MYG_HUMAN_UPS Myoglobin (Chain 2-154) - Homo sapiens (Human)	26	0	0	0	0	0	24	0	0	0	0	0	28	29	0	0	0	0	0	29	33
d1548	d1548.a1	d1548.a1.a1	P01031ups|CO5_HUMAN_UPS Complement C5 (C5a anaphylatoxin) (Chain 678-751) - Homo sapiens (Human)	1	0	0	0	0	0	1	0	0	0	0	0	1	1	0	0	0	0	0	1	1
c883	c883.a1	c883.a1.a1	P01008ups|ANT3_HUMAN_UPS Antithrombin-III (Chain 33-464) - Homo sapiens (Human)	8	0	0	0	0	0	7	0	0	0	0	0	9	7	0	0	0	0	0	6	6
a8	a8.a1	a8.a1.a1	P00918ups|CAH2_HUMAN_UPS Carbonic anhydrase 2 (Chain 2-260) - Homo sapiens (Human)	330	0	0	0	0	0	316	0	0	0	0	0	330	314	0	0	0	0	0	286	296
b22	b22.a1	b22.a1.a1	P00915ups|CAH1_HUMAN_UPS Carbonic anhydrase 1 (Chain 2-261) - Homo sapiens (Human)	231	0	0	0	0	0	219	0	0	0	0	0	247	232	0	0	0	0	0	223	213
d1562	d1562.a1	d1562.a1.a1	P00709ups|LALBA_HUMAN_UPS Alpha-lactalbumin (Chain 20-142) - Homo sapiens (Human)	1	0	0	0	0	0	1	0	0	0	0	0	1	1	0	0	0	0	0	1	1
c595	c595.a1	c595.a1.a1	P00167ups|CYB5_HUMAN_UPS Cytochrome b5 (Chain 1-134, N-terminal His tag) - Homo sapiens (Human)	14	0	0	0	0	0	14	0	0	0	0	0	18	16	0	0	0	0	0	16	18
d1011	d1011.a1	d1011.a1.a1	O76070ups|SYUG_HUMAN_UPS Gamma-synuclein (Chain 1-127) - Homo sapiens (Human)	4	0	0	0	0	0	7	0	0	0	0	0	5	5	0	0	0	0	0	5	4
c937	c937.a1	c937.a1.a1	Chassy_SC_992;N1P8D6;P28273; 5-oxoprolinase - OXP1	1	3	5	3	1	1	0	4	3	3	3	0	0	0	3	3	2	0	3	0	0
d1439	d1439.a1	d1439.a1.a1	Chassy_SC_987;N1NZA6;P32329; Aspartic proteinase 3 - YPS1	0	1	1	0	1	0	0	1	1	0	2	0	0	0	0	1	1	0	0	0	0
d1129	d1129.a1	d1129.a1.a1	Chassy_SC_986;N1NXC0;Q03088; Styryl dye vacuolar localization protein 3 - SVL3	0	1	6	1	1	0	0	0	2	0	0	1	0	0	2	1	5	0	2	0	0
d1902	d1902.a1	d1902.a1.a1	Chassy_SC_985;N1NVS7;Q12108; Restriction of telomere capping protein 5 - RTC5	0	0	0	0	0	0	0	0	0	0	0	0	0	0	0	0	0	0	1	0	0
d1991	d1991.a1	d1991.a1.a1	Chassy_SC_984;N1NWZ3;P41735; 5-demethoxyubiquinone hydroxylase, mitochondrial - CAT5	0	0	0	0	0	1	0	0	0	0	0	0	0	0	0	0	0	0	0	0	0
c276	c276.a1	c276.a1.a1	Chassy_SC_980;N1NYG2;P40217; Eukaryotic translation initiation factor 3 subunit I - TIF34	8	13	14	17	19	18	7	14	13	16	14	18	4	3	14	15	15	10	17	6	3
c698	c698.a1	c698.a1.a1	Chassy_SC_98;N1NX22;Q03028; Mitochondrial 2-oxodicarboxylate carrier 1 - ODC1	1	4	4	3	3	5	2	5	5	5	4	4	4	3	4	2	5	1	6	1	2
d2091	d2091.a1	d2091.a1.a1	Chassy_SC_977;N1PA78;P40002; Transcriptional regulator MIT1 - MIT1	0	0	0	0	0	0	0	0	0	0	0	0	0	0	0	0	1	0	0	0	0
c694	c694.a1	c694.a1.a1	Chassy_SC_975;N1NZ02;Q08818; Meiotic sister-chromatid recombination protein 6, mitochondrial - MSC6	2	4	5	5	6	5	2	5	6	8	2	3	1	0	3	3	6	2	6	0	0
c586	c586.a1	c586.a1.a1	Chassy_SC_974;N1NVW9;Q08686; Thiosulfate sulfurtransferase TUM1 - TUM1	1	8	7	5	11	1	1	8	8	2	12	4	0	0	7	7	11	0	7	0	1
c237	c237.a1	c237.a1.a1	Chassy_SC_973;N1P6Z9;Q06151; m7GpppX diphosphatase - DCS1	4	8	11	13	14	9	3	11	14	14	12	8	2	3	11	15	9	4	13	4	4
d1865	d1865.a1	d1865.a1.a1	Chassy_SC_972;N1P0U9;Q02204; 54S ribosomal protein L13, mitochondrial - MRPL13	0	1	0	0	0	0	0	0	0	0	0	1	0	0	0	0	0	0	0	0	0
d1827	d1827.a1	d1827.a1.a1	Chassy_SC_971;N1NYB3;P53829; Protein CAF40 - CAF40	0	0	1	0	0	1	0	0	0	0	0	0	0	0	0	0	0	0	0	0	0
d1163	d1163.a1	d1163.a1.a1	Chassy_SC_97;N1NVQ8;P38910; 10 kDa heat shock protein, mitochondrial - HSP10	0	2	2	2	1	2	0	0	1	0	2	2	0	0	2	1	1	0	2	0	0
c708	c708.a1	c708.a1.a1	Chassy_SC_967;N1NZ21;P15274; AMP deaminase - AMD1	0	4	7	3	2	8	0	2	5	5	2	2	1	0	8	4	6	3	8	0	0
d1273	d1273.a1	d1273.a1.a1	Chassy_SC_965;N1NVQ2;Q08096; RNA 3'-terminal phosphate cyclase-like protein - RCL1	0	1	1	1	0	1	0	2	1	1	1	2	0	0	0	1	1	0	1	0	0
c104	c104.a2	c104.a2.a1	Chassy_SC_961;N1P1W7;Q12230; Sphingolipid long chain base-responsive protein LSP1 - LSP1	4	14	10	11	14	7	6	12	13	10	15	7	5	8	11	14	14	5	14	6	4
d1180	d1180.a1	d1180.a1.a1	Chassy_SC_960;N1P1M6;P47125; Indoleamine 2,3-dioxygenase - BNA2	0	0	2	2	0	5	0	0	1	0	0	6	0	0	0	0	0	2	1	0	0
c875	c875.a1	c875.a1.a1	Chassy_SC_953;N1P6Y8;P40040; Protein THO1 - THO1	0	4	4	1	2	3	0	1	4	1	6	4	0	0	1	3	3	3	4	0	0
d1855	d1855.a1	d1855.a1.a1	Chassy_SC_952;N1P8F4;P38132; DNA replication licensing factor MCM7 - MCM7	0	0	0	0	0	1	0	0	0	0	0	0	0	0	0	0	1	0	0	0	0
d1386	d1386.a1	d1386.a1.a1	Chassy_SC_950;N1P1P4;P16370; DNA-directed RNA polymerase II subunit RPB3 - RPB3	0	1	0	1	1	1	0	0	1	0	1	1	0	0	1	0	1	0	1	0	0
d1564	d1564.a1	d1564.a1.a1	Chassy_SC_944;N1P7P7;P25382; Ribosome assembly protein 4 - RSA4	0	0	0	0	1	0	0	0	0	0	0	0	0	0	2	1	2	0	0	0	0
c778	c778.a1	c778.a1.a1	Chassy_SC_943;N1P2U1;P53095; D-serine dehydratase - DSD1	0	4	2	7	5	0	0	4	5	6	5	0	0	0	5	5	5	0	4	0	0
b13	b13.a2	b13.a2.a1	Chassy_SC_941;N1P9V9;P26263; Pyruvate decarboxylase isozyme 3 - PDC6	8	19	24	19	30	18	8	21	25	18	30	19	11	10	22	22	26	16	21	10	12
c759	c759.a1	c759.a1.a1	Chassy_SC_940;N1P8G4;P47035; Nucleolar protein NET1 - NET1	1	2	8	4	3	3	2	2	4	3	3	3	1	1	6	2	7	1	2	0	0
c617	c617.a1	c617.a1.a1	Chassy_SC_939;N1NX56;Q12109; Tryptophan--tRNA ligase, cytoplasmic - WRS1	1	4	5	3	8	7	2	6	4	4	7	8	1	1	2	7	7	4	6	1	2
d1701	d1701.a1	d1701.a1.a1	Chassy_SC_938;N1NWT3;P53725; M-phase phosphoprotein 6 homolog - MPP6	0	0	0	0	0	0	0	0	0	0	0	1	0	0	0	0	0	1	1	0	0
c278	c278.a1	c278.a1.a1	Chassy_SC_933;N1NW80;P54885; Gamma-glutamyl phosphate reductase - PRO2	7	14	13	15	13	13	6	19	12	15	16	15	8	5	14	15	21	10	15	5	6
d1805	d1805.a1	d1805.a1.a1	Chassy_SC_931;N1PA52;P40064; Nucleoporin NUP157 - NUP157	0	0	1	0	0	0	0	0	0	0	0	0	0	0	0	0	1	0	0	0	0
c729	c729.a2	c729.a2.a1	Chassy_SC_929;N1P5G5;P32642; Monothiol glutaredoxin-4 - GRX4	0	2	1	3	1	0	0	1	3	2	3	2	0	0	1	2	1	0	5	0	0
c290	c290.a1	c290.a1.a1	Chassy_SC_928;N1P4H5;P51401; 60S ribosomal protein L9-B - RPL9B	6	13	10	11	15	9	8	12	14	13	14	11	9	6	10	13	10	9	13	6	4
d1568	d1568.a1	d1568.a1.a1	Chassy_SC_926;N1P2G7;P23293; Serine/threonine-protein kinase BUR1 - SGV1	0	0	1	1	0	0	0	0	1	0	1	1	0	0	1	0	0	0	0	0	0
d1800	d1800.a1	d1800.a1.a1	Chassy_SC_925;N1NXT2;Q06506; Ribosomal RNA-processing protein 9 - RRP9	0	0	0	1	0	1	0	0	0	0	0	0	0	0	0	0	0	0	0	0	0
b81	b81.a1	b81.a1.a1	Chassy_SC_916;N1P3E7;Q01217; Protein ARG5,6, mitochondrial - ARG5,6	19	40	33	25	42	22	17	37	35	27	37	29	17	22	30	37	44	12	32	20	17
d1758	d1758.a1	d1758.a1.a1	Chassy_SC_914;N1P320;P38887; Uncharacterized protein YHR202W - YHR202W	0	0	0	1	0	0	0	0	0	1	0	0	0	0	0	0	0	0	1	0	0
d2069	d2069.a1	d2069.a1.a1	Chassy_SC_912;N1NYX6;Q07800; Phosphatase PSR1 - PSR1	0	0	0	0	1	0	0	0	0	0	0	0	0	0	0	0	0	0	0	0	0
d1994	d1994.a1	d1994.a1.a1	Chassy_SC_91;N1P3N4;Q12481; rRNA biogenesis protein RRP36 - RRP36	0	0	0	0	0	1	0	0	0	0	0	0	0	0	0	0	0	0	0	0	0
c331	c331.a1	c331.a1.a1	Chassy_SC_906;N1P514;Q04947; Reticulon-like protein 1 - RTN1	9	12	14	10	13	9	12	12	11	9	10	11	9	7	11	10	14	10	8	11	10
d1597	d1597.a1	d1597.a1.a1	Chassy_SC_905;N1NWN0;P35202; Thiamine pyrophosphokinase - THI80	0	0	1	1	0	0	0	0	1	0	0	1	0	0	0	0	1	0	1	0	0
c942	c942.a1	c942.a1.a1	Chassy_SC_9;N1P4N4;P38820; Adenylyltransferase and sulfurtransferase UBA4 - UBA4	0	4	2	3	3	4	0	1	3	4	2	1	0	0	2	1	2	0	5	0	0
d1068	d1068.a1	d1068.a1.a1	Chassy_SC_896;N1NXF3;Q03798; Altered inheritance of mitochondria protein 36, mitochondrial - AIM36	0	2	3	0	1	2	0	0	1	1	2	3	0	0	3	2	3	1	1	0	0
c214	c214.a1	c214.a1.a1	Chassy_SC_895;N1P7Q6;P15891; Actin-binding protein - ABP1	13	17	19	18	18	16	14	15	15	18	19	16	9	10	17	22	20	12	20	9	10
b12	b12.a1	b12.a1.a1	Chassy_SC_893;N1P7B9;P32324; Elongation factor 2 - EFT1	52	92	93	86	87	92	58	85	93	105	88	107	55	51	85	88	112	81	109	48	44
d1654	d1654.a1	d1654.a1.a1	Chassy_SC_892;N1NZD9;P32523; Pre-mRNA-processing factor 19 - PRP19	0	1	0	0	0	0	0	1	0	0	0	0	0	0	0	0	2	0	0	0	0
d1432	d1432.a1	d1432.a1.a1	Chassy_SC_890;N1P9I7;P38884; Altered inheritance of mitochondria protein 18, mitochondrial - AIM18	0	1	0	1	1	0	0	1	1	0	1	0	0	0	1	1	1	0	0	0	0
c681	c681.a1	c681.a1.a1	Chassy_SC_888;N1NYR9;P14906; Protein translocation protein SEC63 - SEC63	2	4	5	3	6	5	1	4	3	5	2	6	1	1	2	4	9	4	8	1	1
c855	c855.a1	c855.a1.a1	Chassy_SC_887;N1NXX3;P50945; MICOS complex subunit MIC27 - MIC27	0	3	2	6	5	0	0	3	4	5	5	1	0	0	0	4	4	0	4	0	0
c207	c207.a1	c207.a1.a1	Chassy_SC_886;N1P0U3;P54838; Dihydroxyacetone kinase 1 - DAK1	11	13	17	28	20	17	12	17	18	30	16	12	12	10	14	15	18	8	26	8	10
d1248	d1248.a1	d1248.a1.a1	Chassy_SC_88;N1NZN7;Q06143; Mitochondrial dicarboxylate transporter - DIC1	0	2	0	2	1	0	0	1	0	1	1	1	0	0	1	2	2	0	1	0	0
c583	c583.a1	c583.a1.a1	Chassy_SC_877;N1P9G0;P38741; Meiotic activator RIM4 - RIM4	2	10	15	2	10	0	4	10	11	0	7	0	0	0	10	8	7	0	3	0	3
d1924	d1924.a1	d1924.a1.a1	Chassy_SC_875;N1P456;P40168; Uncharacterized protein YNL195C - YNL195C	0	0	1	0	0	0	0	0	0	0	0	0	0	0	0	0	0	0	0	0	0
c104	c104.a1	c104.a1.a1	Chassy_SC_874;N1P279;P53252; Sphingolipid long chain base-responsive protein PIL1 - PIL1	10	22	17	19	22	14	9	19	18	15	25	17	8	9	15	22	24	13	20	8	6
d1693	d1693.a1	d1693.a1.a1	Chassy_SC_873;N1P127;P46673; Nucleoporin NUP85 - NUP85	0	0	1	1	0	0	0	0	0	0	0	0	0	0	2	0	0	0	0	0	0
d1640	d1640.a1	d1640.a1.a1	Chassy_SC_871;N1P419;P53272; Uncharacterized protein YGR122W - YGR122W	0	0	0	0	0	0	0	0	1	1	0	1	0	0	0	1	0	0	1	0	0
d1553	d1553.a1	d1553.a1.a1	Chassy_SC_87;N1P9W6;P40260; Ammonium transporter MEP1 - MEP1	0	0	1	0	1	0	0	0	1	0	2	0	0	0	0	1	0	0	0	0	0
d1503	d1503.a1	d1503.a1.a1	Chassy_SC_869;N1NVG4;Q02457; Protein TBF1 - TBF1	0	0	0	0	0	1	0	0	1	1	0	1	0	0	0	1	2	0	1	0	0
d1789	d1789.a1	d1789.a1.a1	Chassy_SC_867;N1P7H3;P48813; High-affinity glutamine permease - GNP1	0	0	0	0	0	0	0	0	0	0	0	2	0	0	0	0	0	0	0	0	0
d1092	d1092.a1	d1092.a1.a1	Chassy_SC_861;N1P6H2;Q12176; Ribosome biogenesis protein MAK21 - MAK21	0	2	2	1	1	2	0	1	1	1	2	2	0	0	1	3	4	0	1	0	0
d1270	d1270.a1	d1270.a1.a1	Chassy_SC_86;N1P7Q3;P25372; Thioredoxin-3, mitochondrial - TRX3	0	1	2	0	3	0	0	0	2	0	3	0	0	0	0	1	2	0	0	0	0
d1972	d1972.a1	d1972.a1.a1	Chassy_SC_856;N1P5E3;P39960; GTPase-activating protein BEM2/IPL2 - BEM2	0	0	1	0	0	0	0	0	0	0	0	0	0	0	0	0	0	0	0	0	0
c934	c934.a1	c934.a1.a1	Chassy_SC_854;N1P1N3;P06102; General negative regulator of transcription subunit 3 - NOT3	0	3	5	4	3	1	0	2	4	3	2	1	0	0	3	2	3	0	2	0	0
d1387	d1387.a1	d1387.a1.a1	Chassy_SC_851;N1P515;P39969; Protein BOI2 - BOI2	0	0	2	0	0	0	1	1	1	0	1	1	0	0	1	0	2	0	0	0	0
d1764	d1764.a1	d1764.a1.a1	Chassy_SC_850;N1NYT7;Q06689; Cell membrane protein YLR413W - YLR413W	0	0	0	0	0	1	0	0	0	0	0	1	0	0	0	0	0	1	0	0	0
c697	c697.a1	c697.a1.a1	Chassy_SC_85;N1NYU8;Q03532; ATP-dependent RNA helicase HAS1 - HAS1	0	3	4	6	7	6	1	2	5	7	3	7	2	1	2	2	5	3	6	1	0
c904	c904.a1	c904.a1.a1	Chassy_SC_847;N1P8T1;P33317; Deoxyuridine 5'-triphosphate nucleotidohydrolase - DUT1	0	2	4	4	3	2	0	2	2	3	2	2	1	0	2	3	3	3	2	0	1
c902	c902.a1	c902.a1.a1	Chassy_SC_841;N1NXQ0;P11938; DNA-binding protein RAP1 - RAP1	1	3	3	1	4	1	1	2	3	1	4	3	1	1	3	4	3	0	1	1	0
d1831	d1831.a1	d1831.a1.a1	Chassy_SC_836;N1P8T9;P38340; Alpha N-terminal protein methyltransferase 1 - TAE1	0	0	0	0	0	0	0	0	0	0	0	0	0	0	0	1	0	0	1	0	0
d1755	d1755.a1	d1755.a1.a1	Chassy_SC_831;N1PAM6;Q07716; Altered inheritance of mitochondria protein 6 - AIM6	0	0	0	0	1	0	0	0	0	0	0	0	0	0	0	1	1	0	0	0	0
c282	c282.a1	c282.a1.a1	Chassy_SC_83;N1P602;P32419; Malate dehydrogenase, peroxisomal - MDH3	2	16	15	16	21	11	2	20	12	15	22	13	4	3	13	14	21	9	23	1	2
c464	c464.a1	c464.a1.a1	Chassy_SC_829;N1P6R7;P12385; Eukaryotic peptide chain release factor subunit 1 - SUP45	4	8	7	8	11	7	3	10	5	11	9	10	2	3	5	7	10	9	11	3	3
c566	c566.a2	c566.a2.a1	Chassy_SC_828;N1P1A8;P47165; Xanthine phosphoribosyltransferase 1 - XPT1	0	0	2	0	3	0	0	2	1	1	3	0	0	0	2	3	1	0	1	0	0
d1901	d1901.a1	d1901.a1.a1	Chassy_SC_825;N1P1A7;P33310; ATP-dependent permease MDL1, mitochondrial - MDL1	0	0	0	0	0	0	0	0	0	1	0	0	0	0	0	0	0	0	0	0	0
d1921	d1921.a1	d1921.a1.a1	Chassy_SC_824;N1NWB7;CENPK specific;No description in SC288c, annotation and gene name in CENPK: Cps1p -CENPK1137D_1960	0	0	0	0	0	0	0	0	0	0	0	0	0	0	0	1	0	0	0	0	0
d1389	d1389.a1	d1389.a1.a1	Chassy_SC_817;N1P3X5;P40011; 4-hydroxy-4-methyl-2-oxoglutarate aldolase - YER010C	0	1	0	0	0	1	0	1	1	2	1	0	0	0	0	1	1	0	1	0	0
c713	c713.a1	c713.a1.a1	Chassy_SC_816;N1P273;P38810; SED5-binding protein 3 - SFB3	2	3	4	4	2	5	3	2	4	4	4	9	1	2	4	3	5	4	3	1	0
c589	c589.a1	c589.a1.a1	Chassy_SC_813;N1NVG1;P05744; 60S ribosomal protein L33-A - RPL33A	3	3	4	4	6	5	3	3	4	2	5	6	4	4	4	5	4	3	5	3	2
c714	c714.a1	c714.a1.a1	Chassy_SC_812;N1NZ11;Q04697; Glucose-signaling factor 2 - GSF2	3	6	3	1	3	4	4	2	4	6	2	6	2	2	4	3	4	4	4	0	2
c866	c866.a1	c866.a1.a1	Chassy_SC_81;N1P8J6;P20434; DNA-directed RNA polymerases I, II, and III subunit RPABC1 - RPB5	1	1	4	2	5	3	0	4	3	4	3	3	1	0	1	2	4	1	2	1	0
c518	c518.a1	c518.a1.a1	Chassy_SC_809;N1P410;P50085; Prohibitin-2 - PHB2	3	7	9	6	8	7	2	7	6	6	7	8	5	4	7	7	7	6	9	1	2
c776	c776.a1	c776.a1.a1	Chassy_SC_807;N1P6N3;P32495; H/ACA ribonucleoprotein complex subunit 2 - NHP2	0	3	5	1	5	5	0	6	3	4	4	4	1	0	2	3	5	3	3	0	0
d1274	d1274.a1	d1274.a1.a1	Chassy_SC_806;N1P3U9;P39998; Enhancer of mRNA-decapping protein 3 - EDC3	0	1	2	1	1	0	0	0	1	0	2	0	0	0	1	2	2	0	1	0	0
d1683	d1683.a1	d1683.a1.a1	Chassy_SC_805;N1P0Y4;P51998; 54S ribosomal protein YmL6, mitochondrial - YML6	0	0	0	0	0	0	0	0	0	0	2	0	0	0	0	0	0	0	2	0	0
d1243	d1243.a1	d1243.a1.a1	Chassy_SC_803;N1P315;P38885; Altered inheritance of mitochondria protein 46, mitochondrial - AIM46	0	1	1	1	1	1	0	1	2	1	1	1	0	0	1	1	1	1	1	0	0
d1682	d1682.a1	d1682.a1.a1	Chassy_SC_799;N1NYG7;P53859; Exosome complex component CSL4 - CSL4	0	0	1	0	1	0	0	1	0	0	0	0	0	0	0	0	0	0	1	0	0
d1860	d1860.a1	d1860.a1.a1	Chassy_SC_792;N1P8G3;Q03778; Riboflavin kinase - FMN1	0	1	0	0	0	0	0	0	0	0	0	0	0	0	0	0	1	0	0	0	0
d1648	d1648.a1	d1648.a1.a1	Chassy_SC_790;N1P0Z3;P36151; Uncharacterized protein YKR070W - YKR070W	0	1	0	0	1	0	0	0	0	0	1	0	0	0	0	0	0	0	1	0	0
d1399	d1399.a1	d1399.a1.a1	Chassy_SC_79;N1NZS9;Q05775; Eukaryotic translation initiation factor 3 subunit J - HCR1	0	1	1	1	1	0	0	0	2	0	2	1	0	0	1	0	0	0	0	0	0
c646	c646.a1	c646.a1.a1	Chassy_SC_788;N1NZY4;P32366; V-type proton ATPase subunit d - VMA6	2	5	5	3	3	6	2	3	6	4	5	7	1	3	6	5	6	4	6	1	1
b42	b42.a1	b42.a1.a1	Chassy_SC_787;N1P3Q6;P05030; Plasma membrane ATPase 1 - PMA1	29	40	46	57	41	37	29	37	45	64	38	42	35	29	40	47	51	33	54	27	26
d1770	d1770.a1	d1770.a1.a1	Chassy_SC_784;N1P4G6;P53323; EKC/KEOPS complex subunit BUD32 - BUD32	0	0	0	0	0	0	0	0	0	0	0	1	0	0	0	0	1	0	1	0	0
d1326	d1326.a1	d1326.a1.a1	Chassy_SC_783;N1P2A8;P36081; Uncharacterized protein YKL077W - YKL077W	0	0	0	2	1	1	0	0	1	1	1	1	0	0	1	0	2	0	1	0	0
c307	c307.a1	c307.a1.a1	Chassy_SC_781;N1P858;Q03195; Translation initiation factor RLI1 - RLI1	6	13	15	15	14	20	6	12	14	13	12	16	6	5	16	11	13	11	11	4	3
d1488	d1488.a1	d1488.a1.a1	Chassy_SC_78;N1P4H0;P51601; GTP cyclohydrolase 1 - FOL2	0	0	0	0	1	1	0	0	0	0	2	1	0	0	2	0	1	0	0	0	0
d1573	d1573.a1	d1573.a1.a1	Chassy_SC_775;N1P6G0;Q12328; Mitochondrial import inner membrane translocase subunit TIM22 - TIM22	0	0	1	1	0	1	0	0	0	0	0	0	0	0	0	0	2	0	1	0	0
d2019	d2019.a1	d2019.a1.a1	Chassy_SC_773;N1P627;P25365; Putative guanine nucleotide-exchange factor SED4 - SED4	0	0	0	0	0	0	0	0	0	0	0	0	0	0	0	1	0	0	0	0	0
d1214	d1214.a1	d1214.a1.a1	Chassy_SC_771;N1P359;P08539; Guanine nucleotide-binding protein alpha-1 subunit - GPA1	0	2	3	0	1	1	0	0	2	1	1	1	0	0	2	1	1	0	1	0	0
d1694	d1694.a1	d1694.a1.a1	Chassy_SC_770;N1P1F1;Q12498; Pheromone-regulated membrane protein 4 - PRM4	0	1	0	0	0	0	0	1	0	0	0	0	0	0	1	0	1	0	0	0	0
d1344	d1344.a1	d1344.a1.a1	Chassy_SC_768;N1NWS1;P25040; 20S rRNA accumulation protein 4 - TSR4	0	1	0	2	2	1	0	0	0	1	1	0	0	0	0	1	1	0	2	0	0
d1272	d1272.a1	d1272.a1.a1	Chassy_SC_763;N1NW64;Q12754; Ribosomal RNA-processing protein 12 - RRP12	0	0	1	1	2	2	0	0	0	3	0	0	0	0	0	2	3	0	0	0	0
c940	c940.a1	c940.a1.a1	Chassy_SC_760;N1P5L7;P25340; Delta(24(24(1)))-sterol reductase - ERG4	2	3	2	2	1	4	2	3	1	0	1	3	1	2	2	2	2	3	0	1	0
b62	b62.a3	b62.a3.a1	Chassy_SC_76;N1NWR1;P53982; Isocitrate dehydrogenase [NADP] - IDP3	4	7	10	4	9	5	2	10	6	6	9	5	3	3	4	5	10	4	6	4	3
c833	c833.a1	c833.a1.a1	Chassy_SC_752;N1PA84;CENPK specific;No description in SC288c, annotation and gene name in CENPK: Gpa2p -CENPK1137D_3678	0	2	4	2	2	3	1	4	6	1	3	3	0	0	4	3	7	1	3	0	0
c737	c737.a1	c737.a1.a1	Chassy_SC_75;N1P6Q7;P32469; Diphthine methyl ester synthase - DPH5	0	6	4	7	4	2	0	3	4	7	2	5	1	1	1	4	6	1	5	0	0
d1765	d1765.a1	d1765.a1.a1	Chassy_SC_749;N1NX43;Q02979; Glycerophosphocholine phosphodiesterase GDE1 - GDE1	0	0	1	0	0	0	0	0	1	1	0	0	0	0	0	0	0	0	0	0	0
d1492	d1492.a1	d1492.a1.a1	Chassy_SC_748;N1P8Z3;P38196;|reversed Uridine permease - FUI1	0	0	0	1	0	0	0	0	1	3	0	0	0	0	1	1	0	0	1	0	0
d1198	d1198.a1	d1198.a1.a1	Chassy_SC_747;N1P3G7;P53130; Heterotrimeric G protein gamma subunit GPG1 - GPG1	0	1	2	0	2	0	0	2	1	2	1	1	0	0	1	2	2	0	1	0	0
d1598	d1598.a1	d1598.a1.a1	Chassy_SC_745;N1P4V3;CENPK specific;No description in SC288c, annotation and gene name in CENPK: Nog2p -CENPK1137D_2732	0	0	0	1	1	0	0	0	0	1	1	0	0	0	0	0	1	0	1	0	0
d1739	d1739.a1	d1739.a1.a1	Chassy_SC_74;N1NZB5;P53909; Adenine deaminase - AAH1	0	0	0	0	1	0	0	0	0	0	0	0	0	0	0	1	1	0	0	0	0
c375	c375.a2	c375.a2.a1	Chassy_SC_737;N1P5P7;P40989; 1,3-beta-glucan synthase component GSC2 - GSC2	3	8	11	6	7	10	3	5	13	6	5	10	2	3	11	13	12	5	9	2	3
c706	c706.a1	c706.a1.a1	Chassy_SC_734;N1P103;P05749; 60S ribosomal protein L22-A - RPL22A	0	6	4	5	6	4	0	2	3	3	5	4	0	0	4	4	4	2	4	1	0
c721	c721.a1	c721.a1.a1	Chassy_SC_733;N1NXV1;P49334; Mitochondrial import receptor subunit TOM22 - TOM22	0	4	4	9	4	3	0	4	4	5	5	5	0	0	3	5	4	3	5	0	0
c611	c611.a1	c611.a1.a1	Chassy_SC_730;N1P0I2;P36015; Synaptobrevin homolog YKT6 - YKT6	2	8	8	3	6	1	2	7	6	5	6	2	0	1	7	9	7	3	7	0	1
d1748	d1748.a1	d1748.a1.a1	Chassy_SC_725;N1P2T9;P25038; Translation initiation factor IF-2, mitochondrial - IFM1	0	0	2	0	0	0	0	0	0	0	0	0	0	0	0	0	1	0	0	0	0
d1026	d1026.a1	d1026.a1.a1	Chassy_SC_723;N1P8E5;P32501; Translation initiation factor eIF-2B subunit epsilon - GCD6	1	2	2	1	3	1	0	3	3	2	1	2	0	0	1	1	4	0	2	0	0
d1108	d1108.a1	d1108.a1.a1	Chassy_SC_72;N1P4N3;P13586; Calcium-transporting ATPase 1 - PMR1	0	0	2	3	1	1	1	1	1	2	0	1	0	0	1	5	4	0	0	0	0
c604	c604.a1	c604.a1.a1	Chassy_SC_718;N1PAC5;P05756; 40S ribosomal protein S13 - RPS13	4	5	7	6	8	3	4	5	4	3	5	2	5	2	6	5	4	3	5	3	5
d1507	d1507.a1	d1507.a1.a1	Chassy_SC_714;N1P919;P30605; Myo-inositol transporter 1 - ITR1	0	0	0	0	0	2	0	0	1	0	0	1	0	0	1	0	1	1	0	0	0
c344	c344.a1	c344.a1.a1	Chassy_SC_712;N1NWL4;P33297; 26S proteasome regulatory subunit 6A - RPT5	4	12	13	13	13	16	3	14	14	13	15	13	1	3	11	9	14	11	15	1	3
d1681	d1681.a1	d1681.a1.a1	Chassy_SC_710;N1P294;P40555; Probable 26S proteasome regulatory subunit p27 - NAS2	0	0	0	1	0	0	0	0	0	0	1	0	0	0	0	1	0	0	1	0	0
d2042	d2042.a1	d2042.a1.a1	Chassy_SC_71;N1NXZ6;Q08951; AP-3 complex subunit delta - APL5	0	0	0	0	0	0	0	0	0	0	0	1	0	0	0	0	0	0	0	0	0
b20	b20.a1	b20.a1.a1	Chassy_SC_709;N1NYG5;P16521; Elongation factor 3A - YEF3	38	70	56	81	67	70	38	69	60	83	65	79	41	41	52	67	82	56	86	30	36
c852	c852.a1	c852.a1.a1	Chassy_SC_708;N1P0Z0;P00431; Cytochrome c peroxidase, mitochondrial - CCP1	1	3	4	3	4	0	0	3	6	2	5	1	0	0	3	3	3	2	3	0	0
c154	c154.a1	c154.a1.a1	Chassy_SC_707;N1NW16;P08417; Fumarate hydratase, mitochondrial - FUM1	9	22	19	30	26	15	11	23	25	27	26	14	9	11	16	20	29	12	38	5	9
b97	b97.a2	b97.a2.a1	Chassy_SC_703;N1P215;P40510; D-3-phosphoglycerate dehydrogenase 2 - SER33	14	18	20	21	19	26	16	20	16	20	21	20	11	11	18	20	22	16	21	9	11
d2024	d2024.a1	d2024.a1.a1	Chassy_SC_701;N1P056;CENPK|reversed specific;No description in SC288c, annotation and gene name in CENPK: Cdc25p -CENPK1137D_761	0	0	1	0	0	0	0	0	0	0	0	0	0	0	0	0	0	0	0	0	0
d1499	d1499.a1	d1499.a1.a1	Chassy_SC_700;N1PAM1;P39932; Sugar transporter STL1 - STL1	0	0	0	1	0	0	0	0	0	2	0	0	0	0	0	0	0	0	5	0	0
d1936	d1936.a1	d1936.a1.a1	Chassy_SC_7;N1P6B5;P25332; Ribokinase - RBK1	0	0	0	0	0	0	0	0	0	1	0	0	0	0	0	0	0	0	0	0	0
d1554	d1554.a1	d1554.a1.a1	Chassy_SC_698;N1P5G4;P53157; Mitochondrial pyruvate carrier 1 - MPC1	0	0	1	0	0	0	0	0	0	0	2	0	0	0	1	1	1	0	0	0	0
d1914	d1914.a1	d1914.a1.a1	Chassy_SC_697;N1NW43;P46683; Ankyrin repeat-containing protein YAR1 - YAR1	0	0	0	0	1	0	0	0	0	0	0	0	0	0	0	0	0	0	0	0	0
d1644	d1644.a1	d1644.a1.a1	Chassy_SC_694;N1NZG4;P38915; Transcription factor SPT8 - SPT8	0	0	1	0	0	0	0	0	1	0	1	0	0	0	0	0	1	0	0	0	0
d1742	d1742.a1	d1742.a1.a1	Chassy_SC_690;N1P9K2;P38129; Transcription initiation factor TFIID subunit 5 - TAF5	0	0	0	0	0	0	0	0	0	1	0	0	0	0	0	1	0	0	1	0	0
c969	c969.a1	c969.a1.a1	Chassy_SC_684;N1NYD0;Q12000; Translation machinery-associated protein 46 - TMA46	0	2	3	3	2	2	0	2	3	2	2	2	0	0	2	3	3	1	3	0	0
c983	c983.a1	c983.a1.a1	Chassy_SC_683;N1NVW6;Q02875; SMY2 homolog 2 - SYH1	0	3	2	4	0	4	0	1	1	1	3	3	0	0	0	1	8	0	2	0	0
c836	c836.a1	c836.a1.a1	Chassy_SC_680;N1P458;P53292; 37S ribosomal protein S35, mitochondrial - MRPS35	0	2	1	2	9	3	0	2	1	4	7	4	0	0	1	1	4	1	6	0	0
b42	b42.a2	b42.a2.a1	Chassy_SC_679;N1NVZ2;P19657; Plasma membrane ATPase 2 - PMA2	22	29	40	42	31	24	22	27	36	41	30	28	26	26	32	35	38	21	38	23	21
d1743	d1743.a1	d1743.a1.a1	Chassy_SC_677;N1P170;P22936; DNA-(apurinic or apyrimidinic site) lyase 1 - APN1	0	0	1	0	1	0	0	0	0	0	0	0	0	0	0	0	0	0	1	0	0
d1529	d1529.a1	d1529.a1.a1	Chassy_SC_675;N1PAJ2;P52488; Ubiquitin-activating enzyme E1-like - UBA2	0	1	0	0	0	0	0	0	1	1	0	0	0	0	0	0	2	0	2	0	0
d1498	d1498.a1	d1498.a1.a1	Chassy_SC_674;N1P9R1;P38203; U6 snRNA-associated Sm-like protein LSm2 - LSM2	0	0	0	1	1	0	0	1	0	1	1	0	0	0	0	1	1	0	1	0	0
c864	c864.a1	c864.a1.a1	Chassy_SC_670;N1P5R2;P11491; Repressible alkaline phosphatase - PHO8	1	1	4	3	4	1	1	4	2	3	4	4	0	0	1	2	2	1	6	0	1
d1020	d1020.a1	d1020.a1.a1	Chassy_SC_666;N1NW27;P00812; Arginase - CAR1	0	2	2	4	0	0	0	0	4	4	1	0	0	0	3	1	1	0	7	0	0
c323	c323.a1	c323.a1.a1	Chassy_SC_665;N1P4H2;P07283; Phosphomannomutase - SEC53	7	10	11	14	15	12	7	15	9	13	12	13	6	8	12	13	16	7	11	9	6
c928	c928.a1	c928.a1.a1	Chassy_SC_663;N1PA15;P43555; Protein EMP47 - EMP47	0	1	3	3	4	5	0	0	2	1	2	4	0	0	3	4	2	1	3	0	0
c449	c449.a1	c449.a1.a1	Chassy_SC_660;N1NWR3;P40303; Proteasome subunit alpha type-4 - PRE6	4	8	6	7	11	7	4	10	11	11	9	8	3	5	6	12	12	3	11	3	2
d1550	d1550.a1	d1550.a1.a1	Chassy_SC_66;N1P4G9;Q07648; D-aminoacyl-tRNA deacylase - DTD1	0	0	0	1	1	0	0	0	1	1	0	0	0	0	0	0	1	0	1	0	0
d1190	d1190.a1	d1190.a1.a1	Chassy_SC_659;N1P5J6;Q99385; Vacuolar calcium ion transporter - VCX1	0	1	1	4	1	0	0	0	0	3	0	1	0	0	1	2	2	0	2	0	0
d2025	d2025.a1	d2025.a1.a1	Chassy_SC_658;N1P4F2;P40487; 2-(3-amino-3-carboxypropyl)histidine synthase subunit 1 - DPH1	0	0	0	0	0	0	0	0	0	0	0	0	0	0	0	0	0	0	1	0	0
c402	c402.a1	c402.a1.a1	Chassy_SC_655;N1NXJ2;P21242; Probable proteasome subunit alpha type-7 - PRE10	7	9	13	8	13	8	7	9	10	11	11	7	4	3	12	8	10	6	11	3	3
c577	c577.a1	c577.a1.a1	Chassy_SC_653;N1P492;P33399; La protein homolog - LHP1	0	7	10	4	7	7	0	5	8	9	9	6	0	0	5	7	7	5	8	0	0
c431	c431.a1	c431.a1.a1	Chassy_SC_651;N1P4E4;P40327; 26S proteasome regulatory subunit 4 homolog - RPT2	9	8	9	9	8	6	6	11	8	10	11	8	5	5	7	12	11	5	9	3	2
c607	c607.a1	c607.a1.a1	Chassy_SC_650;N1P6E7;P25039; Elongation factor G, mitochondrial - MEF1	2	5	5	6	5	3	3	5	8	3	5	8	1	1	5	7	7	3	4	2	4
d1838	d1838.a1	d1838.a1.a1	Chassy_SC_649;N1NZ50;Q12387; N-terminal acetyltransferase B complex subunit MDM20 - MDM20	0	0	0	0	0	0	0	0	0	0	0	1	0	0	0	0	1	0	0	0	0
c944	c944.a1	c944.a1.a1	Chassy_SC_648;N1NX06;P23202; Transcriptional regulator URE2 - URE2	0	2	2	2	1	1	0	3	3	2	3	3	0	0	2	2	5	1	5	0	0
b41	b41.a2	b41.a2.a1	Chassy_SC_646;N1PAL7;Q04409; Putative glucokinase-2 - EMI2	14	16	17	18	12	22	12	14	19	19	12	27	12	11	19	9	15	20	16	10	12
b97	b97.a1	b97.a1.a1	Chassy_SC_644;N1P4Y2;P40054; D-3-phosphoglycerate dehydrogenase 1 - SER3	17	20	17	23	21	29	17	18	16	20	21	22	15	15	17	24	22	20	21	11	11
c643	c643.a1	c643.a1.a1	Chassy_SC_643;N1P9W9;P23638; Proteasome subunit alpha type-3 - PRE9	0	5	4	8	6	5	1	5	4	6	6	5	1	1	3	5	5	5	8	0	1
d1080	d1080.a1	d1080.a1.a1	Chassy_SC_641;N1P3N2;P53261; Pescadillo homolog - NOP7	0	1	1	3	1	3	1	0	1	2	1	3	0	0	1	2	2	0	2	0	0
c618	c618.a1	c618.a1.a1	Chassy_SC_640;N1NY03;Q06892; NADH kinase POS5, mitochondrial - POS5	2	7	11	4	8	1	1	4	7	5	8	2	2	1	7	3	8	1	6	1	1
a1	a1.a1	a1.a1.a1	Chassy_SC_64;N1P2H7;P00359; Glyceraldehyde-3-phosphate dehydrogenase 3 - TDH3	39	109	131	170	164	157	51	146	142	185	173	187	55	48	108	138	174	138	229	39	40
c396	c396.a1	c396.a1.a1	Chassy_SC_639;N1PA80;P29952; Mannose-6-phosphate isomerase - PMI40	4	14	9	14	12	6	4	8	10	13	14	9	3	4	9	9	12	4	10	4	5
b35	b35.a1	b35.a1.a1	Chassy_SC_637;N1P9R2;P07251; ATP synthase subunit alpha, mitochondrial - ATP1	37	53	48	64	62	46	35	63	55	62	68	51	32	29	45	52	64	39	76	33	30
c404	c404.a1	c404.a1.a1	Chassy_SC_636;N1NYY8;Q04636; FACT complex subunit POB3 - POB3	2	9	9	10	14	7	3	12	10	14	12	10	4	4	8	10	10	8	9	5	2
b10	b10.a1	b10.a1.a1	Chassy_SC_635;N1P4S9;P04806; Hexokinase-1 - HXK1	49	46	50	57	61	149	50	50	56	57	63	188	47	44	48	59	50	125	64	42	43
c659	c659.a1	c659.a1.a1	Chassy_SC_634;N1NWL7;P07274; Profilin - PFY1	2	4	5	3	12	2	2	6	3	5	5	2	2	2	3	7	8	1	4	2	1
c521	c521.a1	c521.a1.a1	Chassy_SC_633;N1NYF2;P53852; Cysteine--tRNA ligase - YNL247W	4	8	9	9	7	9	4	4	4	9	8	7	4	3	5	5	6	7	7	2	3
d1283	d1283.a1	d1283.a1.a1	Chassy_SC_631;N1NXR7;P53875; 54S ribosomal protein L19, mitochondrial - MRPL19	0	1	1	1	0	1	0	0	0	2	2	1	0	0	0	1	2	0	2	0	0
b34	b34.a1	b34.a1.a1	Chassy_SC_630;N1P7G8;P19358; S-adenosylmethionine synthase 2 - SAM2	30	40	35	41	44	47	31	39	34	35	45	58	32	24	36	35	46	44	37	29	25
d1082	d1082.a1	d1082.a1.a1	Chassy_SC_629;N1P0B8;P32892; ATP-dependent RNA helicase DRS1 - DRS1	0	1	1	1	2	2	0	2	2	1	2	2	0	0	0	3	3	1	1	0	0
c456	c456.a1	c456.a1.a1	Chassy_SC_628;N1P9K8;P00447; Superoxide dismutase [Mn], mitochondrial - SOD2	3	13	8	8	11	4	4	11	11	8	15	4	4	3	7	11	8	2	10	3	2
b69	b69.a1	b69.a1.a1	Chassy_SC_627;N1P0K4;P22515; Ubiquitin-activating enzyme E1 1 - UBA1	16	35	39	44	36	43	18	31	38	42	32	45	16	11	35	33	42	26	48	16	14
c655	c655.a1	c655.a1.a1	Chassy_SC_626;N1P1I6;CENPK specific;No description in SC288c, annotation and gene name in CENPK: 40S ribosomal protein S27 -CENPK1137D_5414	4	5	2	6	6	5	3	5	5	6	1	4	3	3	4	0	6	4	7	2	0
c433	c433.a1	c433.a1.a1	Chassy_SC_625;N1P1Y9;Q12031; Mitochondrial 2-methylisocitrate lyase - ICL2	4	13	10	7	13	0	9	13	9	7	10	0	3	4	11	13	14	0	13	5	2
d1528	d1528.a1	d1528.a1.a1	Chassy_SC_624;N1P7X9;P36040; Proteasome assembly chaperone 2 - ADD66	0	0	0	1	1	0	0	1	0	1	1	0	0	0	2	0	0	0	0	0	0
c293	c293.a1	c293.a1.a1	Chassy_SC_623;N1PAF1;P39079; T-complex protein 1 subunit zeta - CCT6	5	14	16	14	16	15	4	16	13	13	15	15	3	3	14	16	19	12	16	5	1
d1496	d1496.a1	d1496.a1.a1	Chassy_SC_622;N1P373;Q12386; Actin-like protein ARP8 - ARP8	0	2	1	1	0	1	0	1	0	1	0	0	0	0	0	0	1	0	0	0	0
b18	b18.a1	b18.a1.a1	Chassy_SC_620;N1P8V5;P00549; Pyruvate kinase 1 - CDC19	53	64	73	72	71	95	50	72	75	73	78	88	49	53	67	66	85	71	86	41	40
c343	c343.a1	c343.a1.a1	Chassy_SC_62;N1P1Z7;P27796; 3-ketoacyl-CoA thiolase, peroxisomal - POT1	6	13	16	13	14	0	6	17	17	16	13	1	5	5	16	13	16	0	15	5	4
d1859	d1859.a1	d1859.a1.a1	Chassy_SC_619;N1P047;P11325; Leucine--tRNA ligase, mitochondrial - NAM2	0	0	2	0	0	0	0	0	0	0	0	0	0	0	0	0	0	0	0	0	0
d1285	d1285.a1	d1285.a1.a1	Chassy_SC_615;N1NZM1;Q06168; Chromatin structure-remodeling complex subunit SFH1 - SFH1	0	1	1	2	1	1	0	0	0	0	1	2	0	0	0	2	2	1	0	0	0
c629	c629.a2	c629.a2.a1	Chassy_SC_614;N1P9L7;Q00772; Mitogen-activated protein kinase SLT2/MPK1 - SLT2	0	1	1	1	3	0	1	2	1	1	2	0	0	0	4	2	3	0	2	1	0
c290	c290.a2	c290.a2.a1	Chassy_SC_612;N1P1M8;P05738; 60S ribosomal protein L9-A - RPL9A	6	14	11	10	14	9	9	12	14	13	15	9	9	7	10	12	10	8	13	6	4
c127	c127.a2	c127.a2.a1	Chassy_SC_610;N1P2F7;P49089; Asparagine synthetase [glutamine-hydrolyzing] 1 - ASN1	11	18	13	10	21	17	13	18	12	13	18	17	8	7	11	19	19	14	15	8	8
c529	c529.a1	c529.a1.a1	Chassy_SC_609;N1P4N6;P43588; Ubiquitin carboxyl-terminal hydrolase RPN11 - RPN11	3	6	6	8	10	7	1	10	7	8	9	8	1	0	5	7	7	5	8	2	2
c248	c248.a1	c248.a1.a1	Chassy_SC_606;N1NWV8;P53549; 26S proteasome subunit RPT4 - RPT4	5	8	9	10	11	7	3	10	10	9	8	10	2	3	9	7	12	5	10	3	3
c168	c168.a2	c168.a2.a1	Chassy_SC_603;N1P4L2;P38714; Arginine--tRNA ligase, mitochondrial - MSR1	0	1	1	0	2	1	0	1	1	2	1	1	1	1	1	1	1	1	1	2	2
d1186	d1186.a1	d1186.a1.a1	Chassy_SC_601;N1P0A8;Q03148; Pyridoxal 5'-phosphate synthase subunit SNZ1 - SNZ1	0	2	0	3	0	0	0	3	0	0	2	0	0	0	0	0	3	0	2	0	0
c762	c762.a1	c762.a1.a1	Chassy_SC_60;N1P886;P38221; Phosphatidate cytidylyltransferase - CDS1	3	3	3	3	3	4	3	2	3	2	1	4	3	1	4	3	3	3	2	4	1
c743	c743.a1	c743.a1.a1	Chassy_SC_6;N1NYF6;Q05979; Kynureninase - BNA5	1	1	5	5	4	3	0	2	4	4	4	5	0	0	7	4	5	4	4	0	0
c140	c140.a1	c140.a1.a1	Chassy_SC_598;N1P4H3;P32565; 26S proteasome regulatory subunit RPN2 - RPN2	14	23	23	21	21	23	17	21	23	28	23	18	12	14	20	25	32	15	26	13	13
a1	a1.a3	a1.a3.a1	Chassy_SC_595;N1NZW1;P00360; Glyceraldehyde-3-phosphate dehydrogenase 1 - TDH1	24	45	58	63	74	61	29	59	54	67	73	70	27	23	50	56	68	53	65	21	21
c700	c700.a1	c700.a1.a1	Chassy_SC_592;N1P9Q3;P23724; Proteasome subunit beta type-6 - PRE7	0	4	3	5	5	4	2	5	3	7	4	2	1	0	1	6	7	3	7	2	1
c542	c542.a1	c542.a1.a1	Chassy_SC_591;N1P1N7;Q06142; Importin subunit beta-1 - KAP95	4	5	7	8	5	7	2	9	7	11	5	8	2	0	5	8	6	6	8	1	1
c605	c605.a1	c605.a1.a1	Chassy_SC_589;N1P2T3;Q08179; Mitochondrial distribution and morphology protein 38 - MDM38	2	4	4	7	7	4	1	3	6	5	10	5	0	1	6	5	6	3	11	1	2
d2041	d2041.a1	d2041.a1.a1	Chassy_SC_584;N1NWU9;P32480; Protein HIR2 - HIR2	0	0	1	0	0	0	0	0	0	0	0	0	0	0	0	0	0	0	0	0	0
d1944	d1944.a1	d1944.a1.a1	Chassy_SC_583;N1NW91;P41835; Thiamine biosynthetic bifunctional enzyme - THI6	0	0	0	0	0	0	0	0	0	0	0	0	0	0	0	1	0	0	0	0	0
c434	c434.a1	c434.a1.a1	Chassy_SC_582;N1NZE6;Q02196; Adenylyl-sulfate kinase - MET14	7	11	7	12	11	8	7	7	9	9	6	7	5	7	6	10	8	6	9	4	4
c401	c401.a1	c401.a1.a1	Chassy_SC_581;N1NZ36;P14904; Vacuolar aminopeptidase 1 - APE1	6	8	9	10	8	9	6	10	10	8	9	11	7	6	11	9	11	8	7	4	6
b76	b76.a1	b76.a1.a1	Chassy_SC_580;N1NWR9;P06634; ATP-dependent RNA helicase DED1 - DED1	13	25	23	27	24	28	13	23	20	24	25	26	12	13	17	22	28	18	27	12	13
c688	c688.a1	c688.a1.a1	Chassy_SC_579;N1P738;P02400; 60S acidic ribosomal protein P2-beta - RPP2B	2	3	3	5	5	3	2	4	3	3	4	3	3	3	5	4	7	2	6	3	2
c749	c749.a1	c749.a1.a1	Chassy_SC_578;N1P1U2;P40581; Glutathione peroxidase-like peroxiredoxin HYR1 - HYR1	3	2	7	2	3	2	0	9	4	4	5	0	2	2	2	5	6	0	3	0	0
d1127	d1127.a1	d1127.a1.a1	Chassy_SC_576;N1P7S8;P20604; Serine/threonine-protein phosphatase PP1-1 - SIT4	0	0	1	0	0	2	0	1	2	2	1	2	0	0	2	2	1	1	5	0	0
c676	c676.a1	c676.a1.a1	Chassy_SC_574;N1P3G5;P04456; 60S ribosomal protein L25 - RPL25	1	5	4	4	11	4	1	4	3	2	9	3	2	1	4	4	5	3	4	1	2
c678	c678.a1	c678.a1.a1	Chassy_SC_570;N1P9A6;Q00245; GTP-binding protein RHO3 - RHO3	4	5	4	4	4	5	2	4	4	5	4	5	3	1	5	5	4	5	4	0	0
c544	c544.a1	c544.a1.a1	Chassy_SC_57;N1P622;P48015; Aminomethyltransferase, mitochondrial - GCV1	2	9	7	5	9	7	3	8	7	5	6	8	2	2	5	8	8	4	5	2	2
c304	c304.a1	c304.a1.a1	Chassy_SC_564;N1NX38;P02992; Elongation factor Tu, mitochondrial - TUF1	7	15	14	12	16	10	7	11	13	14	14	12	6	4	11	13	19	10	15	6	8
c452	c452.a2	c452.a2.a1	Chassy_SC_563;N1NVU4;P32836; GTP-binding nuclear protein GSP2/CNR2 - GSP2	6	8	7	6	7	4	6	6	6	7	7	6	7	4	6	7	7	3	7	5	6
c374	c374.a1	c374.a1.a1	Chassy_SC_562;N1P8K2;P24276; Protein SSD1 - SSD1	2	13	22	15	13	6	2	12	16	10	12	10	0	0	11	12	18	3	12	1	0
c289	c289.a1	c289.a1.a1	Chassy_SC_561;N1P375;P04076; Argininosuccinate lyase - ARG4	9	14	11	5	13	17	10	15	16	4	14	18	8	8	12	18	24	15	5	7	5
d1046	d1046.a1	d1046.a1.a1	Chassy_SC_559;N1P2J2;P40509; Coatomer subunit epsilon - SEC28	0	1	0	3	2	2	0	4	0	3	2	1	0	0	0	3	2	1	3	0	0
b13	b13.a1	b13.a1.a1	Chassy_SC_557;N1P0G2;P06169; Pyruvate decarboxylase isozyme 1 - PDC1	47	81	93	93	97	80	46	89	97	90	93	98	50	43	88	74	105	66	109	47	41
c221	c221.a1	c221.a1.a1	Chassy_SC_551;N1NYM9;P05317; 60S acidic ribosomal protein P0 - RPP0	8	16	16	20	25	18	9	20	18	17	19	18	8	7	14	18	24	14	20	7	5
b39	b39.a1	b39.a1.a1	Chassy_SC_547;N1P1B1;P38720; 6-phosphogluconate dehydrogenase, decarboxylating 1 - GND1	27	39	35	51	45	33	28	37	39	48	39	32	26	23	29	40	49	24	52	29	21
d1495	d1495.a1	d1495.a1.a1	Chassy_SC_546;N1P8X3;P39704; Protein ERP2 - ERP2	0	0	0	0	0	2	0	0	0	0	0	2	0	0	0	2	2	0	0	0	0
c746	c746.a1	c746.a1.a1	Chassy_SC_5435;N1P9F6;P18562; Uracil phosphoribosyltransferase - FUR1	2	3	4	5	4	2	1	5	5	4	4	2	1	0	4	2	5	0	5	1	2
d1527	d1527.a1	d1527.a1.a1	Chassy_SC_5432;N1P0D6;P38615; Serine/threonine-protein kinase RIM11/MSD1 - RIM11	0	0	2	0	0	1	0	0	1	0	0	0	0	0	1	0	2	0	0	0	0
d1313	d1313.a1	d1313.a1.a1	Chassy_SC_5427;N1NY46;Q08162; Exosome complex exonuclease DIS3 - DIS3	0	2	2	1	1	1	0	1	1	0	0	1	0	0	0	0	1	0	2	0	0
c672	c672.a1	c672.a1.a1	Chassy_SC_5426;N1P4L6;P53101; Cystathionine beta-lyase - STR3	2	8	5	1	7	0	2	8	6	3	8	0	1	1	6	9	7	0	2	1	1
d1954	d1954.a1	d1954.a1.a1	Chassy_SC_5425;N1P420;P47025; Mitochondrial division protein 1 - MDV1	0	0	0	0	0	0	0	0	0	0	0	0	0	0	1	0	0	0	0	0	0
c188	c188.a2	c188.a2.a1	Chassy_SC_5423;N1P7J0;Q04120; Peroxiredoxin TSA2 - TSA2	0	4	0	1	2	0	0	4	0	0	0	0	0	0	0	2	5	0	0	0	1
d1314	d1314.a1	d1314.a1.a1	Chassy_SC_5421;N1P9L9;P38768; Protein interacting with Hsp90 1 - PIH1	0	1	1	1	1	1	0	1	1	0	1	1	0	0	1	1	1	0	1	0	0
d1066	d1066.a1	d1066.a1.a1	Chassy_SC_5419;N1P680;Q12746; Plasma membrane-associated coenzyme Q6 reductase PGA3 - PGA3	0	2	2	3	1	1	0	2	2	2	2	1	0	0	0	2	3	1	1	0	0
c501	c501.a1	c501.a1.a1	Chassy_SC_5417;N1P2S7;Q02046; Methylenetetrahydrofolate dehydrogenase [NAD(+)] - MTD1	1	9	7	9	11	8	1	7	10	6	9	9	0	1	7	10	11	7	9	0	0
c275	c275.a2	c275.a2.a1	Chassy_SC_5416;N1P7V9;P06367; 40S ribosomal protein S14-A - RPS14A	8	12	14	15	18	14	11	11	11	13	18	11	6	8	12	14	15	8	19	10	6
c838	c838.a1	c838.a1.a1	Chassy_SC_5412;N1P3J3;P47127; Altered inheritance of mitochondria protein 24, mitochondrial - AIM24	1	4	1	5	1	0	0	1	7	5	3	4	1	0	2	2	4	1	5	1	0
d1647	d1647.a1	d1647.a1.a1	Chassy_SC_5411;N1NW13;Q12284; FAD-linked sulfhydryl oxidase ERV2 - ERV2	0	0	1	0	0	0	0	0	0	0	0	1	0	0	1	0	1	0	0	0	0
d2078	d2078.a1	d2078.a1.a1	Chassy_SC_5409;N1P0X2;P47054; Nucleoporin NUP192 - NUP192	0	0	1	0	0	0	0	0	0	0	0	0	0	0	0	0	0	0	0	0	0
d1497	d1497.a1	d1497.a1.a1	Chassy_SC_5405;N1NW57;Q06511; Ribosomal RNA-processing protein 15 - RRP15	0	0	0	0	0	0	0	0	0	1	2	0	0	0	0	1	2	1	1	0	0
c933	c933.a1	c933.a1.a1	Chassy_SC_5403;N1P289;P38716; Uncharacterized trans-sulfuration enzyme YHR112C - YHR112C	1	1	3	0	3	5	1	2	4	2	2	2	0	0	3	2	3	2	2	0	0
d2071	d2071.a1	d2071.a1.a1	Chassy_SC_5402;N1NXI0;P39013; Actin cytoskeleton-regulatory complex protein END3 - END3	0	0	1	0	0	0	0	0	0	0	0	0	0	0	0	0	0	0	0	0	0
d1791	d1791.a1	d1791.a1.a1	Chassy_SC_5400;N1PAL5;P50896; Protein PSP1 - PSP1	0	0	1	0	0	0	0	0	0	0	0	0	0	0	0	0	1	0	0	0	0
c911	c911.a1	c911.a1.a1	Chassy_SC_540;N1P6C3;Q2V2P9; Uncharacterized protein YDR119W-A - YDR119W-A	2	2	2	2	2	2	2	2	2	2	2	2	2	1	2	2	3	2	1	2	1
d1570	d1570.a1	d1570.a1.a1	Chassy_SC_54;N1PAW6;P38352; SCF-associated factor 1 - SAF1	0	0	1	0	1	0	0	0	2	0	0	0	0	0	1	1	0	0	0	0	0
c441	c441.a1	c441.a1.a1	Chassy_SC_5398;N1P3Z0;P40017; Carnitine O-acetyltransferase YAT2 - YAT2	5	9	10	11	6	1	6	7	15	15	7	3	3	5	12	8	9	1	14	5	3
d1074	d1074.a1	d1074.a1.a1	Chassy_SC_5389;N1NVW0;P20436; DNA-directed RNA polymerases I, II, and III subunit RPABC3 - RPB8	0	2	1	2	1	3	0	2	1	1	1	3	0	0	2	2	2	0	2	0	0
d1612	d1612.a1	d1612.a1.a1	Chassy_SC_5386;N1P092;P47150; 37S ribosomal protein S7, mitochondrial - RSM7	0	0	1	0	0	1	0	1	0	0	1	1	0	0	0	0	0	0	0	0	0
d1622	d1622.a1	d1622.a1.a1	Chassy_SC_5385;N1NXB5;P32452; Putative prephenate dehydratase - PHA2	0	0	1	1	0	0	0	0	0	0	0	1	0	0	0	1	1	0	0	0	0
d1652	d1652.a1	d1652.a1.a1	Chassy_SC_5380;N1NW51;Q06497; Peroxisomal adenine nucleotide transporter 1 - ANT1	0	0	0	0	0	0	0	0	0	1	0	0	0	0	0	1	1	0	1	0	0
c572	c572.a1	c572.a1.a1	Chassy_SC_5379;N1P6F4;P38061; 60S ribosomal protein L32 - RPL32	2	5	4	5	10	5	3	6	5	4	9	7	3	2	5	6	9	4	8	2	2
d1315	d1315.a1	d1315.a1.a1	Chassy_SC_5376;N1PA48;P39965; Probable proline--tRNA ligase, mitochondrial - AIM10	0	1	3	0	1	0	0	0	2	1	1	2	0	0	1	0	0	0	1	0	0
d1939	d1939.a1	d1939.a1.a1	Chassy_SC_5375;N1P5B5;P39985; DNA polymerase V - POL5	0	0	0	0	0	0	0	0	0	0	0	1	0	0	0	0	0	0	0	0	0
c742	c742.a1	c742.a1.a1	Chassy_SC_5374;N1P7S7;CENPK specific;No description in SC288c, annotation and gene name in CENPK: Leu2p -CENPK1137D_4481	1	2	3	3	3	3	4	4	3	4	3	3	2	2	3	4	4	4	4	1	2
c769	c769.a1	c769.a1.a1	Chassy_SC_5370;N1P2P8;P36136; Sedoheptulose 1,7-bisphosphatase - SHB17	1	4	6	3	5	1	0	4	5	3	3	4	1	0	4	5	5	0	4	0	0
d1727	d1727.a1	d1727.a1.a1	Chassy_SC_5365;N1P6Q8;P32908; Structural maintenance of chromosomes protein 1 - SMC1	0	0	1	0	0	0	0	0	0	0	0	0	0	0	0	1	1	0	0	0	0
d1034	d1034.a1	d1034.a1.a1	Chassy_SC_5360;N1P1Q8;Q02785; ATP-dependent permease PDR12 - PDR12	0	0	0	0	6	0	0	0	0	0	8	0	0	0	0	13	1	0	0	0	0
d2081	d2081.a1	d2081.a1.a1	Chassy_SC_5357;N1P850;P38961; 25S rRNA (adenine(645)-N(1))-methyltransferase - RRP8	0	0	0	0	0	0	0	0	0	0	0	0	0	0	0	0	1	0	0	0	0
c356	c356.a1	c356.a1.a1	Chassy_SC_5355;N1P8U5;P0C0W1; 40S ribosomal protein S22-A - RPS22A	5	8	10	11	16	10	9	12	9	11	16	8	5	5	10	13	12	6	15	6	6
c950	c950.a1	c950.a1.a1	Chassy_SC_5353;N1P0T8;Q03629; Uncharacterized protein YML079W - YML079W	0	1	4	3	3	0	0	3	4	1	6	0	0	0	2	4	5	0	1	0	0
c895	c895.a1	c895.a1.a1	Chassy_SC_5351;N1P8C0;P35719; Uncharacterized protein MRP8 - MRP8	0	0	3	7	6	0	0	4	3	1	0	0	0	0	6	8	3	0	1	0	0
c677	c677.a1	c677.a1.a1	Chassy_SC_5350;N1P6F2;Q12117; Protein MRH1 - MRH1	3	1	4	9	3	1	2	1	4	6	2	0	2	1	3	3	3	0	6	2	4
c757	c757.a1	c757.a1.a1	Chassy_SC_535;N1P9M6;P38145; Riboflavin synthase - RIB5	0	5	6	2	3	3	0	5	6	3	4	2	0	0	2	3	8	3	4	0	0
d1505	d1505.a1	d1505.a1.a1	Chassy_SC_5348;N1NZN6;P36053; Transcription elongation factor 1 - ELF1	0	1	1	0	0	0	0	0	1	1	1	0	0	0	1	0	0	0	1	0	0
d1787	d1787.a1	d1787.a1.a1	Chassy_SC_5347;N1NYI4;Q05874; Protein N-terminal and lysine N-methyltransferase EFM7 - NNT1	0	0	1	0	0	0	0	0	1	0	0	0	0	0	0	0	0	0	0	0	0
d1867	d1867.a1	d1867.a1.a1	Chassy_SC_5345;N1NXS0;P23797; N-acetylglucosaminyl-phosphatidylinositol de-N-acetylase - GPI12	0	0	0	1	0	0	0	0	0	1	0	0	0	0	0	0	0	0	0	0	0
c310	c310.a2	c310.a2.a1	Chassy_SC_5344;N1P3L8;P38627; CTP synthase 2 - URA8	1	7	9	5	7	8	3	7	12	6	8	8	1	1	9	8	8	4	5	1	0
c127	c127.a1	c127.a1.a1	Chassy_SC_534;N1P2B6;P49090; Asparagine synthetase [glutamine-hydrolyzing] 2 - ASN2	13	21	16	12	19	15	12	16	14	14	12	14	11	10	14	13	18	14	20	10	8
c596	c596.a1	c596.a1.a1	Chassy_SC_5339;N1P1C6;P38886; 26S proteasome regulatory subunit RPN10 - RPN10	2	6	4	5	6	4	2	6	10	5	6	2	1	3	8	7	7	4	7	1	0
c522	c522.a1	c522.a1.a1	Chassy_SC_5338;N1NWX9;Q12189; Ribose-5-phosphate isomerase - RKI1	0	9	9	10	10	2	0	10	9	13	10	3	0	0	5	8	11	1	11	2	0
b25	b25.a1	b25.a1.a1	Chassy_SC_5336;N1P439;P00924; Enolase 1 - ENO1	29	51	46	76	71	74	33	57	60	74	72	70	33	33	44	64	71	47	75	31	24
c622	c622.a1	c622.a1.a1	Chassy_SC_5335;N1P073;P47137; Uncharacterized oxidoreductase YJR096W - YJR096W	1	5	10	2	13	0	1	6	8	4	9	0	3	0	10	7	7	0	2	2	0
c242	c242.a1	c242.a1.a1	Chassy_SC_5334;N1P2I0;P40495; Homoisocitrate dehydrogenase, mitochondrial - LYS12	11	19	18	16	15	10	12	15	16	17	15	18	7	10	14	11	21	10	20	10	7
c507	c507.a1	c507.a1.a1	Chassy_SC_5330;N1P4W6;P29704; Squalene synthase - ERG9	8	6	7	4	7	7	8	5	7	4	5	8	4	6	4	8	9	9	5	3	6
c170	c170.a1	c170.a1.a1	Chassy_SC_533;N1NYV0;Q06440; Coronin-like protein - CRN1	15	16	17	21	23	21	12	17	14	21	22	27	10	13	16	21	22	22	26	9	10
d1244	d1244.a1	d1244.a1.a1	Chassy_SC_5329;N1P352;P37299; Cytochrome b-c1 complex subunit 10 - QCR10	0	1	1	0	1	0	1	2	1	0	1	0	1	1	0	1	2	0	1	0	1
c965	c965.a1	c965.a1.a1	Chassy_SC_5326;N1P9G4;P32904; 54S ribosomal protein L6, mitochondrial - MRPL6	0	3	2	3	6	1	0	3	1	1	3	1	0	0	1	1	3	1	5	0	0
b50	b50.a1	b50.a1.a1	Chassy_SC_5323;N1P1P0;P32191; Glycerol-3-phosphate dehydrogenase, mitochondrial - GUT2	32	46	52	49	44	15	29	42	57	45	43	16	23	31	53	43	48	10	56	27	28
c382	c382.a1	c382.a1.a1	Chassy_SC_5320;N1P5X9;Q12377; 26S proteasome regulatory subunit RPN6 - RPN6	7	9	13	14	13	5	5	11	11	11	9	9	5	5	9	10	13	4	13	5	4
d1054	d1054.a1	d1054.a1.a1	Chassy_SC_5316;N1P1U1;P46151; Methylenetetrahydrofolate reductase 1 - MET12	0	1	2	2	2	1	0	3	2	2	1	2	0	0	1	2	2	1	2	0	0
b19	b19.a2	b19.a2.a1	Chassy_SC_5313;N1P334;P06105; Protein SCP160 - SCP160	20	28	31	33	36	27	17	31	31	26	33	34	16	15	32	30	30	17	29	18	18
d2074	d2074.a1	d2074.a1.a1	Chassy_SC_5311;N1P9Q5;P38064; 54S ribosomal protein L16, mitochondrial - MRPL16	0	0	0	0	0	0	0	0	0	0	1	0	0	0	0	0	0	0	0	0	0
c391	c391.a1	c391.a1.a1	Chassy_SC_531;N1P5R9;P49095; Glycine dehydrogenase (decarboxylating), mitochondrial - GCV2	6	17	5	8	13	6	8	13	9	7	13	5	4	6	9	10	21	6	9	2	2
d2030	d2030.a1	d2030.a1.a1	Chassy_SC_5309;N1P2Z9;P36068; SWI5-dependent HO expression protein 2 - SHE2	0	0	0	0	0	1	0	0	0	0	0	0	0	0	0	0	0	0	0	0	0
d1788	d1788.a1	d1788.a1.a1	Chassy_SC_5307;N1NX31;P32864; Rab proteins geranylgeranyltransferase component A - MRS6	0	0	1	0	0	0	0	0	0	0	0	0	0	0	0	0	0	1	0	0	0
d1393	d1393.a1	d1393.a1.a1	Chassy_SC_5306;N1NZ43;Q12292; Autophagy-related protein 34 - ATG34	0	1	2	0	1	0	0	1	2	0	1	0	0	0	1	0	1	0	0	0	0
c238	c238.a1	c238.a1.a1	Chassy_SC_5305;N1NZV4;P32074; Coatomer subunit gamma - SEC21	9	23	18	17	16	17	8	13	17	20	11	22	5	5	19	17	18	12	19	5	6
c680	c680.a1	c680.a1.a1	Chassy_SC_5304;N1P449;P38626; NADH-cytochrome b5 reductase 1 - CBR1	2	6	1	5	3	6	1	3	3	4	3	9	2	1	3	5	7	4	4	2	3
c671	c671.a2	c671.a2.a1	Chassy_SC_5302;N1NW96;P29295; Casein kinase I homolog HRR25 - HRR25	1	1	2	0	1	2	1	0	2	1	0	0	0	0	1	2	1	1	0	0	0
d1487	d1487.a1	d1487.a1.a1	Chassy_SC_5301;N1P6Y1;P50108; Probable alpha-1,6-mannosyltransferase MNN10 - MNN10	0	1	0	1	0	1	1	0	0	0	0	1	0	0	1	1	0	1	0	0	0
d1624	d1624.a1	d1624.a1.a1	Chassy_SC_530;N1PA11;P53048; General alpha-glucoside permease - MAL11	0	0	0	0	0	2	0	0	0	0	0	1	0	0	0	0	0	2	0	0	0
c854	c854.a1	c854.a1.a1	Chassy_SC_53;N1P1U3;P21827; Guanine nucleotide exchange factor SRM1 - SRM1	0	3	2	3	2	6	0	3	3	4	1	5	0	0	1	3	5	2	3	0	0
b62	b62.a2	b62.a2.a1	Chassy_SC_5294;N1P7R0;P21954; Isocitrate dehydrogenase [NADP], mitochondrial - IDP1	10	15	18	17	24	20	11	23	17	23	22	21	11	10	17	17	20	15	21	9	11
c732	c732.a1	c732.a1.a1	Chassy_SC_5293;N1P7Q5;Q04410; GRASP65 homolog protein 1 - GRH1	0	4	4	2	2	8	0	5	5	3	3	7	0	0	4	3	6	5	3	0	0
b66	b66.a1	b66.a1.a1	Chassy_SC_5292;N1P3F9;P07244; Bifunctional purine biosynthetic protein ADE5,7 - ADE5,7	23	39	34	35	35	36	27	37	36	38	36	43	21	19	29	38	41	28	36	19	17
d1052	d1052.a1	d1052.a1.a1	Chassy_SC_5288;N1P7E5;P20051; Dihydroorotase - URA4	0	3	1	2	0	2	0	1	2	3	2	1	0	0	1	2	3	1	2	0	0
c347	c347.a2	c347.a2.a1	Chassy_SC_5286;N1P7N1;P19146; ADP-ribosylation factor 2 - ARF2	4	10	7	11	10	9	2	9	10	11	8	11	4	3	8	8	11	4	7	2	3
d1064	d1064.a1	d1064.a1.a1	Chassy_SC_5284;N1P8K9;P20049; Prephenate dehydrogenase [NADP(+)] - TYR1	0	2	1	2	1	2	0	1	1	4	0	1	0	0	2	1	3	2	2	0	0
c645	c645.a1	c645.a1.a1	Chassy_SC_5282;N1P0D5;P33201; Ribosome assembly factor MRT4 - MRT4	1	4	4	5	8	5	1	3	5	6	6	6	1	1	3	6	6	4	9	0	0
c224	c224.a1	c224.a1.a1	Chassy_SC_5279;N1P6I4;P31688; Trehalose-phosphatase - TPS2	15	17	19	17	19	10	12	15	22	21	20	7	13	10	16	18	22	7	18	10	9
c256	c256.a2	c256.a2.a1	Chassy_SC_5277;N1NZV9;P53834; Hsp90 co-chaperone HCH1 - HCH1	1	1	4	2	3	0	1	1	5	1	2	1	1	1	3	2	2	0	3	1	1
d1609	d1609.a1	d1609.a1.a1	Chassy_SC_5276;N1NVV2;Q03010; Transcriptional regulatory protein UME1 - UME1	0	0	1	0	1	0	0	0	1	1	0	0	0	0	0	0	1	0	0	0	0
c998	c998.a1	c998.a1.a1	Chassy_SC_5274;N1P1C8;Q05812; Meiotic sister-chromatid recombination protein 3 - MSC3	0	1	6	1	2	0	0	2	4	1	3	1	0	0	4	1	4	0	1	0	0
d1737	d1737.a1	d1737.a1.a1	Chassy_SC_5272;N1NX33;Q02948; Vacuolar protein sorting-associated protein 30 - VPS30	0	0	0	0	0	0	1	0	0	1	0	0	0	0	0	1	0	0	0	0	0
c591	c591.a1	c591.a1.a1	Chassy_SC_5271;N1P4B9;P32381; Actin-related protein 2 - ARP2	1	5	8	6	6	5	2	3	7	6	6	6	2	2	6	4	6	4	9	2	2
c549	c549.a1	c549.a1.a1	Chassy_SC_527;N1P611;(P0CX85-P0CX84);60S ribosomal protein L35- NA	5	5	5	6	10	4	3	7	4	5	8	4	6	5	4	5	7	6	5	4	5
d1404	d1404.a1	d1404.a1.a1	Chassy_SC_5269;N1NY09;Q08920; Nuclear cap-binding protein subunit 2 - CBC2	1	1	1	0	0	0	0	1	0	1	0	1	0	0	1	1	1	0	1	0	0
d1864	d1864.a1	d1864.a1.a1	Chassy_SC_5266;N1P0W3;P40481; Histidine protein methyltransferase 1 - HPM1	0	0	0	0	0	0	0	0	0	0	0	0	0	0	0	0	1	0	1	0	0
d1385	d1385.a1	d1385.a1.a1	Chassy_SC_5263;N1NWG7;P38930; Casein kinase II subunit beta' - CKB2	0	1	1	0	1	1	0	1	1	1	0	1	0	0	1	0	0	0	1	0	0
d1710	d1710.a1	d1710.a1.a1	Chassy_SC_5262;N1P1R9;P47158; Putative transferase CAF17, mitochondrial - IBA57	0	1	0	0	0	0	0	0	0	0	0	0	0	0	0	0	1	0	1	0	0
d2008	d2008.a1	d2008.a1.a1	Chassy_SC_5261;N1NZ31;P34251; Uncharacterized oxidoreductase YKL107W - YKL107W	0	0	0	0	1	0	0	0	0	0	0	0	0	0	0	0	0	0	0	0	0
c380	c380.a1	c380.a1.a1	Chassy_SC_5259;N1NZH6;Q03048; Cofilin - COF1	5	9	10	9	13	9	4	13	8	12	13	9	2	5	5	12	15	8	14	5	6
b87	b87.a1	b87.a1.a1	Chassy_SC_5258;N1NYE0;P38011; Guanine nucleotide-binding protein subunit beta-like protein - ASC1	14	34	29	33	36	28	12	37	30	36	37	30	15	13	30	33	39	25	37	14	13
d1822	d1822.a1	d1822.a1.a1	Chassy_SC_5257;N1NWT7;P53729; Uncharacterized protein YNR029C - YNR029C	0	0	0	0	0	0	0	0	0	0	0	0	0	0	0	1	1	0	0	0	0
c488	c488.a1	c488.a1.a1	Chassy_SC_5254;N1P975;P32521; Actin cytoskeleton-regulatory complex protein PAN1 - PAN1	5	7	16	5	7	9	4	9	13	2	8	8	1	0	13	6	13	2	5	1	1
d1746	d1746.a1	d1746.a1.a1	Chassy_SC_5250;N1P154;P47124; Putative glycosyltransferase HOC1 - HOC1	0	0	0	0	0	0	0	0	0	1	0	2	0	0	0	0	0	0	0	0	0
d1308	d1308.a1	d1308.a1.a1	Chassy_SC_5249;N1P098;Q03103; Endoplasmic oxidoreductin-1 - ERO1	0	0	1	2	0	1	0	1	0	2	0	1	0	0	0	0	0	0	5	0	0
d1772	d1772.a1	d1772.a1.a1	Chassy_SC_5248;N1P3T5;P39927; Protein PTI1 - PTI1	0	1	0	0	1	0	0	0	0	0	0	0	0	0	0	0	0	0	1	0	0
d1255	d1255.a1	d1255.a1.a1	Chassy_SC_5247;N1NZS8;Q06010; A-factor-processing enzyme - STE23	0	2	1	3	1	1	0	0	0	3	0	1	0	0	0	0	0	0	3	0	0
c492	c492.a1	c492.a1.a1	Chassy_SC_5245;N1P8W6;Q04062; 26S proteasome regulatory subunit RPN9 - RPN9	4	7	5	8	8	6	3	8	9	10	8	6	2	3	7	10	11	6	8	2	4
d1305	d1305.a1	d1305.a1.a1	Chassy_SC_5244;N1P5H9;Q04304; UPF0659 protein YMR090W - YMR090W	0	0	0	2	2	0	0	1	0	2	3	0	0	0	0	2	0	0	1	0	0
d1717	d1717.a1	d1717.a1.a1	Chassy_SC_5240;N1P4T8;P38856; Clathrin coat assembly protein AP180A - YAP1801	0	0	1	0	0	0	0	0	1	0	0	0	0	0	0	1	0	0	0	0	0
c505	c505.a1	c505.a1.a1	Chassy_SC_5237;N1P813;P38081; Uncharacterized glycosyl hydrolase YBR056W - YBR056W	4	9	11	5	13	3	2	8	12	7	9	4	3	2	10	9	12	1	3	1	2
d2026	d2026.a1	d2026.a1.a1	Chassy_SC_5232;N1P1Q2;Q02770; Peptidyl-prolyl isomerase CWC27 - CWC27	0	0	0	1	0	0	0	0	0	0	0	0	0	0	0	0	0	0	0	0	0
d2018	d2018.a1	d2018.a1.a1	Chassy_SC_5230;N1NYH9;P29496; Minichromosome maintenance protein 5 - MCM5	0	0	0	0	0	0	0	0	0	1	0	0	0	0	0	0	0	0	0	0	0
d1799	d1799.a1	d1799.a1.a1	Chassy_SC_523;N1P8C3;P32909; Protein SMY2 - SMY2	0	0	1	0	0	0	0	0	0	0	0	0	0	0	0	0	0	0	1	0	0
c625	c625.a2	c625.a2.a1	Chassy_SC_5229;N1NXB8;P18961; Serine/threonine-protein kinase YPK2/YKR2 - YPK2	0	5	8	5	2	5	0	2	9	2	3	3	0	0	4	3	5	1	3	0	1
d1549	d1549.a1	d1549.a1.a1	Chassy_SC_5227;N1P8K6;P38992; Sphingolipid C4-hydroxylase SUR2 - SUR2	0	0	0	0	1	1	0	0	1	0	0	1	0	0	0	1	0	1	0	0	0
c313	c313.a3	c313.a3.a1	Chassy_SC_5223;N1NZW8;Q99260; GTP-binding protein YPT6 - YPT6	2	3	4	1	3	1	2	2	4	2	3	1	1	2	3	3	4	3	2	1	2
d1741	d1741.a1	d1741.a1.a1	Chassy_SC_5221;N1P390;P43600; Uncharacterized protein YFR020W - YFR020W	0	0	0	1	0	0	0	0	0	0	0	1	0	0	0	0	0	1	0	0	0
c630	c630.a1	c630.a1.a1	Chassy_SC_5220;N1P465;P53334; Probable family 17 glucosidase SCW4 - SCW4	0	7	5	2	5	8	0	5	7	3	5	10	1	0	6	6	8	7	3	0	0
c236	c236.a1	c236.a1.a1	Chassy_SC_522;N1P0Y5;P47068; Myosin tail region-interacting protein MTI1 - BBC1	10	11	24	12	18	11	10	10	24	15	19	15	10	9	26	17	21	9	13	7	6
d1798	d1798.a1	d1798.a1.a1	Chassy_SC_5216;N1P7N8;P25632; Chromatin structure-remodeling complex protein RSC6 - RSC6	0	0	0	0	0	1	0	1	0	0	0	0	0	0	0	0	0	0	0	0	0
d1961	d1961.a1	d1961.a1.a1	Chassy_SC_5212;N1P6Z8;P40046; Vacuolar transporter chaperone 1 - VTC1	0	0	0	0	0	1	0	0	0	0	0	0	0	0	0	0	0	0	0	0	0
b73	b73.a2	b73.a2.a1	Chassy_SC_5209;N1NYE5;P53691; Peptidyl-prolyl cis-trans isomerase CPR6 - CPR6	9	13	17	13	12	6	5	10	17	11	11	9	4	3	13	13	14	5	12	5	4
c317	c317.a1	c317.a1.a1	Chassy_SC_5208;N1NX25;Q08977; UPF0662 protein YPL260W - YPL260W	8	13	16	17	12	11	7	13	15	15	10	8	7	5	13	11	14	8	18	4	5
d1368	d1368.a1	d1368.a1.a1	Chassy_SC_5199;N1P6A0;P35178; Ribosomal RNA-processing protein 1 - RRP1	0	0	1	1	1	1	0	0	0	1	1	1	0	0	0	1	1	1	1	0	0
c738	c738.a1	c738.a1.a1	Chassy_SC_5195;N1P192;P38858; 6-phosphogluconolactonase 3 - SOL3	0	5	2	3	8	0	0	8	5	1	7	0	0	0	3	10	10	0	1	0	0
b19	b19.a1	b19.a1.a1	Chassy_SC_5191;N1NZF4;Q02207; Peroxisomal hydratase-dehydrogenase-epimerase - FOX2	40	48	63	58	52	0	35	49	54	51	55	3	38	34	54	51	65	1	67	34	35
c136	c136.a2	c136.a2.a1	Chassy_SC_5190;N1P6J4;P29453; 60S ribosomal protein L8-B - RPL8B	14	17	23	15	28	18	16	20	16	19	22	19	11	15	17	19	19	13	21	15	12
d1821	d1821.a1	d1821.a1.a1	Chassy_SC_519;N1P9P4;P22434; 3',5'-cyclic-nucleotide phosphodiesterase 1 - PDE1	0	0	0	1	0	0	0	0	0	0	0	0	0	1	0	0	0	0	0	0	0
c568	c568.a1	c568.a1.a1	Chassy_SC_5189;N1NY50;P27692; Transcription elongation factor SPT5 - SPT5	3	6	9	5	6	4	3	7	8	6	9	5	1	1	8	7	9	1	7	1	1
d2080	d2080.a1	d2080.a1.a1	Chassy_SC_5186;N1P5Q2;P05318; 60S acidic ribosomal protein P1-alpha - RPP1A	0	0	0	0	1	0	0	0	0	0	0	0	0	0	0	0	0	0	0	0	0
d1176	d1176.a1	d1176.a1.a1	Chassy_SC_5182;N1P2I4;P38874; Elongator complex protein 5 - IKI1	0	1	2	2	1	1	0	1	1	1	1	1	0	0	1	1	2	1	2	0	0
d1401	d1401.a1	d1401.a1.a1	Chassy_SC_5175;N1P9X1;P37293; Putative N-terminal acetyltransferase 2 - NAT2	0	0	2	1	0	1	0	0	1	0	0	2	0	0	1	0	1	0	1	0	0
d2059	d2059.a1	d2059.a1.a1	Chassy_SC_5173;N1P5A1;Q04228; UBX domain-containing protein 2 - UBX2	0	0	0	0	0	0	0	0	0	0	0	0	0	0	0	0	1	0	0	0	0
c369	c369.a1	c369.a1.a1	Chassy_SC_5172;N1P0U1;P12683; 3-hydroxy-3-methylglutaryl-coenzyme A reductase 1 - HMG1	13	15	12	8	13	4	9	8	10	10	9	5	5	7	12	17	18	2	9	4	3
d1706	d1706.a1	d1706.a1.a1	Chassy_SC_5170;N1NYJ2;Q03219; Uncharacterized protein YMR178W - YMR178W	0	0	0	0	0	2	0	0	0	0	0	1	0	0	0	0	0	0	0	0	0
c233	c233.a1	c233.a1.a1	Chassy_SC_517;N1NXW8;P54839; Hydroxymethylglutaryl-CoA synthase - ERG13	9	20	13	13	21	14	13	20	13	16	19	13	10	10	12	18	22	9	21	10	13
d2036	d2036.a1	d2036.a1.a1	Chassy_SC_5167;N1P7C5;Q03327; Mitochondrial fusion and transport protein UGO1 - UGO1	0	0	0	0	0	0	0	0	0	0	0	0	0	0	0	0	1	0	0	0	0
d1039	d1039.a1	d1039.a1.a1	Chassy_SC_5165;N1P5C6;P40086; Cytochrome c oxidase assembly protein COX15 - COX15	3	0	0	0	1	5	1	0	2	1	0	3	1	1	4	2	0	2	0	1	0
c406	c406.a1	c406.a1.a1	Chassy_SC_516;N1P5S1;P40016; 26S proteasome regulatory subunit RPN3 - RPN3	5	11	13	8	9	7	2	7	13	13	9	8	4	4	11	13	15	2	13	3	1
d1985	d1985.a1	d1985.a1.a1	Chassy_SC_5159;N1P0J6;P36024;|reversed Phosphopantothenoylcysteine decarboxylase subunit SIS2 - SIS2	0	0	0	0	1	0	0	0	0	0	0	0	0	0	0	0	0	0	0	0	0
d1157	d1157.a1	d1157.a1.a1	Chassy_SC_5158;N1NW62;P32486; Beta-glucan synthesis-associated protein KRE6 - KRE6	0	3	2	2	1	2	0	0	0	1	0	2	0	0	0	0	3	2	2	0	0
d1868	d1868.a1	d1868.a1.a1	Chassy_SC_5157;N1NVG9;P15179; Aspartate--tRNA ligase, mitochondrial - MSD1	0	0	0	0	0	0	0	0	0	0	0	0	0	0	0	0	2	0	0	0	0
c458	c458.a1	c458.a1.a1	Chassy_SC_5155;N1NWJ1;Q12464; RuvB-like protein 2 - RVB2	1	6	9	9	14	11	0	11	11	12	6	9	2	1	7	6	15	6	12	0	0
c653	c653.a1	c653.a1.a1	Chassy_SC_5154;N1P8N7;P38353; Sec sixty-one protein homolog - SSH1	3	5	4	5	4	4	2	2	4	5	4	6	2	3	4	6	6	5	4	3	1
d1420	d1420.a1	d1420.a1.a1	Chassy_SC_5151;N1NZJ5;Q05871; 3,2-trans-enoyl-CoA isomerase - ECI1	0	1	2	1	0	0	0	1	1	0	1	0	0	0	1	1	0	0	0	0	0
c508	c508.a1	c508.a1.a1	Chassy_SC_5150;N1PAX3;P32602; Alpha-soluble NSF attachment protein - SEC17	5	7	9	6	11	6	3	6	6	7	8	9	3	3	6	7	9	5	10	3	1
d1485	d1485.a1	d1485.a1.a1	Chassy_SC_515;N1P3L7;P53254; U3 small nucleolar RNA-associated protein 22 - UTP22	0	1	1	0	1	1	0	0	1	0	0	1	0	0	1	0	1	0	0	0	0
c637	c637.a1	c637.a1.a1	Chassy_SC_5149;N1P151;P38821; Aspartyl aminopeptidase 4 - APE4	1	6	9	6	8	1	2	6	8	4	6	1	1	0	7	5	7	1	6	0	1
c980	c980.a1	c980.a1.a1	Chassy_SC_5143;N1P5J1;Q12018; Cell division control protein 53 - CDC53	0	3	4	1	2	1	0	2	3	5	2	1	0	0	3	2	2	1	2	0	0
c882	c882.a1	c882.a1.a1	Chassy_SC_5140;N1NZC6;P10507; Mitochondrial-processing peptidase subunit beta - MAS1	0	2	2	4	4	2	0	3	2	3	2	4	0	0	3	2	3	3	4	0	0
c528	c528.a1	c528.a1.a1	Chassy_SC_5137;N1NZB8;P20081; FK506-binding protein 1 - FPR1	4	8	9	5	7	4	3	6	5	8	7	5	3	5	8	8	10	4	8	2	1
d1377	d1377.a1	d1377.a1.a1	Chassy_SC_5136;N1NVJ7;Q12406; Actin-related protein 7 - ARP7	0	1	0	1	0	1	0	1	1	1	0	1	0	0	1	1	1	0	1	0	0
c316	c316.a1	c316.a1.a1	Chassy_SC_5134;N1P637;P16649; General transcriptional corepressor TUP1 - TUP1	6	11	15	12	12	12	12	12	12	14	13	10	6	8	14	8	16	10	11	9	7
d1589	d1589.a1	d1589.a1.a1	Chassy_SC_5131;N1P5N7;Q03280; E3 ubiquitin-protein ligase TOM1 - TOM1	0	0	0	0	0	0	0	0	3	1	0	0	0	0	1	1	0	0	0	0	0
c248	c248.a3	c248.a3.a1	Chassy_SC_513;N1PAJ3;P33298; 26S proteasome regulatory subunit 6B homolog - RPT3	1	3	3	6	4	2	1	4	3	3	2	2	1	1	4	5	3	1	4	1	1
d1138	d1138.a1	d1138.a1.a1	Chassy_SC_5129;N1NYQ3;Q05931; Heat shock protein SSQ1, mitochondrial - SSQ1	0	1	1	3	2	1	0	1	1	3	0	0	0	0	1	1	1	0	5	0	0
d1298	d1298.a1	d1298.a1.a1	Chassy_SC_5123;N1P8V3;P47148; Uncharacterized protein YJR111C - YJR111C	0	2	1	1	1	0	0	1	1	0	1	0	0	0	2	1	2	0	0	0	0
d2047	d2047.a1	d2047.a1.a1	Chassy_SC_5121;N1NYN2;P18851; Guanine nucleotide-binding protein subunit beta - STE4	0	0	0	0	1	0	0	0	0	0	0	0	0	0	0	0	0	0	0	0	0
c974	c974.a1	c974.a1.a1	Chassy_SC_5120;N1P4D2;Q12451; Oxysterol-binding protein homolog 2 - OSH2	1	2	1	1	2	3	1	2	1	2	3	3	0	0	3	2	4	2	1	0	0
d1547	d1547.a1	d1547.a1.a1	Chassy_SC_5119;N1P2D4;P49573; Copper transport protein CTR1 - CTR1	0	0	1	0	0	0	0	0	1	1	0	0	0	0	1	1	0	0	1	0	0
c161	c161.a1	c161.a1.a1	Chassy_SC_5118;N1P0Y7;P04801; Threonine--tRNA ligase, cytoplasmic - THS1	12	18	20	19	19	22	11	19	22	23	20	23	13	16	18	20	24	17	21	14	13
d1179	d1179.a1	d1179.a1.a1	Chassy_SC_5116;N1P8G1;P47031; Mitochondrial outer membrane protein IML2 - IML2	0	1	3	1	0	0	0	0	4	0	0	3	0	0	2	1	2	0	2	0	0
c119	c119.a1	c119.a1.a1	Chassy_SC_5114;N1P0I8;P10081; ATP-dependent RNA helicase eIF4A - TIF1	13	20	22	33	28	33	10	25	25	29	21	36	12	15	21	27	30	24	33	12	12
d1578	d1578.a1	d1578.a1.a1	Chassy_SC_5112;N1P1D0;P11792; Serine/threonine-protein kinase SCH9 - SCH9	0	1	2	0	0	0	0	0	0	0	0	1	0	0	1	0	1	0	0	0	0
c400	c400.a1	c400.a1.a1	Chassy_SC_5111;N1NY70;Q12118; Small glutamine-rich tetratricopeptide repeat-containing protein 2 - SGT2	5	10	11	11	10	8	3	12	9	10	12	9	4	3	9	9	13	7	12	4	3
d1071	d1071.a1	d1071.a1.a1	Chassy_SC_511;N1NW33;P48527; Tyrosine--tRNA ligase, mitochondrial - MSY1	0	2	4	3	1	1	0	1	3	2	0	1	0	0	3	1	3	0	0	0	0
c553	c553.a1	c553.a1.a1	Chassy_SC_5105;N1P7L5;P32471; Elongation factor 1-beta - EFB1	2	8	3	7	8	7	3	5	2	5	8	7	2	3	3	9	7	7	12	1	3
c546	c546.a1	c546.a1.a1	Chassy_SC_5100;N1P264;P38687; Signal recognition particle subunit SRP68 - SRP68	0	8	8	11	8	8	0	4	7	5	5	11	0	0	3	7	15	4	10	0	0
c319	c319.a1	c319.a1.a1	Chassy_SC_510;N1P3C8;P21243; Proteasome subunit alpha type-1 - SCL1	6	12	12	14	17	12	4	12	12	15	17	11	4	7	16	10	16	10	15	3	4
b27	b27.a1	b27.a1.a1	Chassy_SC_5099;N1NZK6;P31539; Heat shock protein 104 - HSP104	49	61	71	50	74	46	48	68	79	52	75	44	37	42	67	73	74	37	50	41	40
c116	c116.a1	c116.a1.a1	Chassy_SC_5098;N1P9T2;P07264; 3-isopropylmalate dehydratase - LEU1	16	26	21	27	28	19	14	31	23	33	26	27	13	16	26	30	33	14	31	15	15
c701	c701.a2	c701.a2.a1	Chassy_SC_5092;N1P2L5;Q02201; Oxysterol-binding protein homolog 6 - OSH6	1	1	2	2	2	2	1	0	1	1	1	1	1	0	1	1	1	1	0	1	1
c984	c984.a1	c984.a1.a1	Chassy_SC_5091;N1NZG1;P42846; Protein KRI1 - KRI1	0	1	3	1	1	3	0	0	1	1	1	6	0	0	3	3	5	2	2	0	0
c563	c563.a1	c563.a1.a1	Chassy_SC_5089;N1PA50;P25451; Proteasome subunit beta type-3 - PUP3	1	8	4	7	8	5	1	8	5	11	6	8	2	1	5	6	10	4	9	0	0
d2021	d2021.a1	d2021.a1.a1	Chassy_SC_5088;N1P028;Q06488; Chromatin structure-remodeling complex subunit RSC2 - RSC2	0	0	0	0	0	1	0	0	0	0	0	0	0	0	0	0	0	0	0	0	0
d1786	d1786.a1	d1786.a1.a1	Chassy_SC_5087;N1P574;P40052; Uncharacterized protein YER079W - YER079W	0	0	1	0	1	0	0	0	0	0	0	0	0	0	0	0	0	0	0	0	0
d1540	d1540.a1	d1540.a1.a1	Chassy_SC_5086;N1P2G5;P38862; Ubiquitin-like modifier-activating enzyme ATG7 - ATG7	0	1	2	0	0	0	0	1	1	0	0	0	0	0	1	0	1	0	0	0	0
d1280	d1280.a1	d1280.a1.a1	Chassy_SC_5084;N1P8Y2;P35845; Oxysterol-binding protein homolog 1 - SWH1	0	0	2	1	1	1	0	0	3	1	1	2	0	0	2	0	0	0	0	0	0
c469	c469.a1	c469.a1.a1	Chassy_SC_5081;N1P2R7;P36148; Glycerol-3-phosphate O-acyltransferase 2 - GPT2	5	10	15	4	9	5	3	8	10	2	10	6	5	5	13	12	9	3	4	4	3
d1158	d1158.a1	d1158.a1.a1	Chassy_SC_5080;N1P129;P38804; Restriction of telomere capping protein 3 - RTC3	0	0	1	1	3	0	0	2	1	1	3	0	0	0	1	3	4	0	0	0	0
c893	c893.a1	c893.a1.a1	Chassy_SC_508;N1P8I8;Q05584; Hydroxyacylglutathione hydrolase, cytoplasmic isozyme - GLO2	0	2	1	7	4	0	0	2	0	5	6	0	0	0	0	3	5	0	7	0	0
d1336	d1336.a1	d1336.a1.a1	Chassy_SC_5079;N1P8T3;Q3E776; Uncharacterized protein YBR255C-A - YBR255C-A	0	1	1	0	1	0	0	1	1	0	1	0	0	0	2	1	1	2	0	0	0
d1903	d1903.a1	d1903.a1.a1	Chassy_SC_5078;N1P5F9;P53063; Decapping nuclease RAI1 - RAI1	0	0	0	0	0	0	0	0	0	1	0	0	0	0	0	0	0	0	0	0	0
c580	c580.a1	c580.a1.a1	Chassy_SC_5076;N1P9S1;P53184; Nicotinamidase - PNC1	3	4	7	7	8	4	2	3	8	7	7	3	3	2	7	5	9	2	9	1	2
b25	b25.a2	b25.a2.a1	Chassy_SC_5072;N1P336;P38689; Ribose-phosphate pyrophosphokinase 3 - PRS3	3	5	6	7	6	7	6	5	6	7	8	9	3	2	6	5	6	5	8	1	1
c338	c338.a1	c338.a1.a1	Chassy_SC_5071;N1P4S7;P40024; ABC transporter ATP-binding protein ARB1 - ARB1	5	6	17	15	18	8	5	13	13	20	13	8	4	3	11	11	15	4	18	3	4
c284	c284.a1	c284.a1.a1	Chassy_SC_5067;N1P9B0;P40482; Protein transport protein SEC24 - SEC24	6	13	15	18	14	18	6	10	16	17	16	12	4	5	16	15	19	7	15	5	5
d1983	d1983.a1	d1983.a1.a1	Chassy_SC_5066;N1P0P6;P36100; Transcription initiation factor IIE subunit alpha - TFA1	0	0	0	1	0	0	0	0	0	0	0	0	0	0	0	0	0	0	0	0	0
d1815	d1815.a1	d1815.a1.a1	Chassy_SC_5065;N1NXJ5;P08425; Phenylalanine--tRNA ligase, mitochondrial - MSF1	0	0	1	0	0	0	0	0	1	0	0	0	0	0	0	0	0	0	0	0	0
d1844	d1844.a1	d1844.a1.a1	Chassy_SC_5064;N1NVH1;P21825; Translocation protein SEC62 - SEC62	0	0	0	0	0	0	0	0	0	0	0	2	0	0	0	0	0	0	0	0	0
d1178	d1178.a1	d1178.a1.a1	Chassy_SC_5063;N1NVI8;P53600; Coatomer subunit zeta - RET3	0	0	0	3	2	1	0	3	2	1	1	1	0	0	2	2	1	0	0	0	0
c961	c961.a1	c961.a1.a1	Chassy_SC_5060;N1P831;Q12298; Uncharacterized ABC transporter ATP-binding protein YDR061W - YDR061W	0	1	3	1	3	2	0	2	5	3	3	2	0	0	3	1	4	1	2	0	0
c198	c198.a1	c198.a1.a1	Chassy_SC_5059;N1NZ91;P38013; Peroxiredoxin AHP1 - AHP1	7	19	21	23	21	7	5	25	23	22	26	10	7	8	21	22	32	6	20	9	6
d2051	d2051.a1	d2051.a1.a1	Chassy_SC_5058;N1P3T6;P53219; Abhydrolase domain-containing protein IMO32 - IMO32	0	0	0	0	0	0	0	0	0	0	0	0	0	0	0	0	1	0	0	0	0
b73	b73.a4	b73.a4.a1	Chassy_SC_5052;N1P573;P35176; Peptidyl-prolyl cis-trans isomerase D - CPR5	0	2	4	4	4	1	0	4	4	2	5	4	0	0	5	2	6	4	5	0	0
d1333	d1333.a1	d1333.a1.a1	Chassy_SC_505;N1P9R4;P32319; Vacuolar protein sorting/targeting protein VPS10 - PEP1	0	1	1	0	0	3	0	1	0	1	1	1	0	0	0	0	1	1	1	0	0
d1128	d1128.a1	d1128.a1.a1	Chassy_SC_5048;N1P4A4;P42941; Phosphoserine phosphatase - SER2	0	1	3	2	2	0	0	3	3	0	1	0	0	0	3	2	2	0	0	0	0
d1360	d1360.a1	d1360.a1.a1	Chassy_SC_5045;N1NXQ1;P40343; Vacuolar protein sorting-associated protein 27 - VPS27	0	0	3	0	1	0	0	1	1	0	0	0	0	0	3	1	1	0	0	0	0
d1520	d1520.a1	d1520.a1.a1	Chassy_SC_504;N1P1K0;P46959; tRNA (adenine(58)-N(1))-methyltransferase catalytic subunit TRM61 - GCD14	0	0	1	0	0	1	0	0	1	1	0	0	0	0	0	0	1	1	1	0	0
d1038	d1038.a1	d1038.a1.a1	Chassy_SC_5039;N1NY56;P32939; GTP-binding protein YPT7 - YPT7	0	2	3	2	3	2	0	3	1	0	1	2	0	0	1	3	1	2	2	0	0
c981	c981.a1	c981.a1.a1	Chassy_SC_5036;N1P233;P53220; Mitochondrial import inner membrane translocase subunit TIM21 - TIM21	1	2	2	2	2	2	1	2	2	2	2	1	1	1	2	2	2	1	2	1	0
d1361	d1361.a1	d1361.a1.a1	Chassy_SC_5035;N1NXU1;P53741; UBP3-associated protein BRE5 - BRE5	0	0	2	1	0	0	0	0	1	1	1	1	0	0	0	0	2	0	2	0	0
c415	c415.a1	c415.a1.a1	Chassy_SC_5034;N1P4J6;CENPK specific;No description in SC288c, annotation and gene name in CENPK: 3-hydroxyisobutyryl-CoA hydrolase, mitochondrial -CENPK1137D_3857	7	9	12	13	12	4	5	12	13	11	12	3	4	1	9	11	14	1	10	2	3
c274	c274.a1	c274.a1.a1	Chassy_SC_5027;N1P4I8;Q12335; Protoplast secreted protein 2 - PST2	7	12	14	13	16	15	6	14	21	15	16	14	7	6	17	15	20	12	13	4	4
b11	b11.a1	b11.a1.a1	Chassy_SC_5025;N1P731;P22202; Heat shock protein SSA4 - SSA4	30	46	47	56	48	24	35	45	47	60	51	25	31	31	43	45	54	22	54	31	34
c761	c761.a1	c761.a1.a1	Chassy_SC_5020;N1NW59;Q06523; Uncharacterized protein YPR148C - YPR148C	0	3	4	6	6	1	0	6	6	2	5	1	0	1	3	2	6	0	6	0	0
d1842	d1842.a1	d1842.a1.a1	Chassy_SC_502;N1NVH8;Q02784; Monothiol glutaredoxin-5, mitochondrial - GRX5	0	0	0	0	1	0	0	0	0	0	1	0	0	0	0	0	0	0	0	0	0
b71	b71.a1	b71.a1.a1	Chassy_SC_5016;N1P1Y6;P33442; 40S ribosomal protein S1-A - RPS1A	18	28	31	37	34	29	19	30	25	35	31	36	19	15	27	30	32	24	33	15	15
d1110	d1110.a1	d1110.a1.a1	Chassy_SC_5012;N1P6K1;P15731; Ubiquitin-conjugating enzyme E2 4 - UBC4	1	0	1	1	2	0	1	1	2	1	1	0	0	0	1	3	2	0	0	1	0
d1756	d1756.a1	d1756.a1.a1	Chassy_SC_5010;N1P9K6;P24583; Protein kinase C-like 1 - PKC1	0	0	0	0	0	0	0	0	0	0	0	0	0	0	0	0	1	0	2	0	0
c673	c673.a1	c673.a1.a1	Chassy_SC_501;N1NWH7;P19454; Casein kinase II subunit alpha' - CKA2	3	4	5	4	4	5	3	3	4	5	5	4	1	1	5	5	5	2	7	1	2
d1506	d1506.a1	d1506.a1.a1	Chassy_SC_5009;N1P862;Q02774; Secretory component protein SHR3 - SHR3	0	0	1	1	0	0	1	0	0	1	0	0	0	0	1	1	1	0	0	0	0
c707	c707.a1	c707.a1.a1	Chassy_SC_5008;N1P469;P53295; Ribosome-interacting GTPase 2 - RBG2	0	6	1	7	6	4	0	7	3	6	5	5	0	0	2	3	6	1	8	0	0
c803	c803.a1	c803.a1.a1	Chassy_SC_5002;N1P9I5;P38879; Nascent polypeptide-associated complex subunit alpha - EGD2	0	4	3	3	4	3	1	3	3	4	5	3	0	0	3	3	3	2	4	1	1
c443	c443.a1	c443.a1.a1	Chassy_SC_500;N1P478;P36421; Tyrosine--tRNA ligase, cytoplasmic - TYS1	4	8	9	13	8	8	4	10	11	9	9	7	3	4	8	8	9	7	9	3	3
c869	c869.a1	c869.a1.a1	Chassy_SC_50;N1P0S6;P40582; Glutathione S-transferase 1 - GTT1	0	0	4	3	8	0	0	5	4	0	4	0	0	0	6	7	3	0	0	0	0
d1930	d1930.a1	d1930.a1.a1	Chassy_SC_5;N1P312;P26793; Flap endonuclease 1 - RAD27	0	1	0	0	0	0	0	0	0	0	0	0	0	0	0	0	0	0	0	0	0
c151	c151.a2	c151.a2.a1	Chassy_SC_4997;N1PAM7;P04050; DNA-directed RNA polymerase II subunit RPB1 - RPO21	5	16	13	8	13	15	4	9	9	10	10	10	3	2	10	8	15	8	14	1	7
d1894	d1894.a1	d1894.a1.a1	Chassy_SC_4996;N1P8N6;Q06683;|reversed Putative ATP-dependent helicase IRC3 - IRC3	0	0	0	1	0	0	0	0	0	0	0	0	0	0	0	0	0	0	0	0	0
c311	c311.a2	c311.a2.a1	Chassy_SC_4995;N1NZL3;P04821; Cell division control protein 25 - CDC25	0	0	1	1	0	0	0	0	1	0	0	0	0	0	1	0	0	0	0	0	0
d1254	d1254.a1	d1254.a1.a1	Chassy_SC_4993;N1NWX4;Q12012; Uncharacterized protein YOR289W - YOR289W	0	0	3	0	1	0	0	1	2	0	1	1	0	0	4	1	1	0	0	0	0
d1394	d1394.a1	d1394.a1.a1	Chassy_SC_4983;N1P9Y2;P13259; Choline-phosphate cytidylyltransferase - PCT1	0	0	0	1	0	1	0	0	0	1	1	2	0	0	0	0	0	1	3	0	0
d1277	d1277.a1	d1277.a1.a1	Chassy_SC_4980;N1P1R8;P40564; DnaJ-like protein 1 - DJP1	0	0	0	2	1	1	0	2	0	2	0	1	0	0	0	0	1	0	4	0	0
c537	c537.a1	c537.a1.a1	Chassy_SC_498;N1P1X8;P07172; Histidinol-phosphate aminotransferase - HIS5	4	10	6	5	9	5	3	4	7	11	9	5	2	3	5	7	8	3	6	2	2
c261	c261.a1	c261.a1.a1	Chassy_SC_4976;N1NZ92;P09733; Tubulin alpha-1 chain - TUB1	9	9	11	10	12	9	9	13	11	12	9	13	9	9	11	12	14	7	13	11	7
c286	c286.a1	c286.a1.a1	Chassy_SC_4975;N1NYD4;P26786; 40S ribosomal protein S7-A - RPS7A	6	9	14	14	10	8	5	10	13	15	14	10	4	1	10	12	13	8	11	4	5
d1061	d1061.a1	d1061.a1.a1	Chassy_SC_4974;N1P9F7;P38254; Probable tubulin--tyrosine ligase PBY1 - PBY1	0	2	3	1	2	1	0	2	3	2	1	0	0	0	2	0	3	0	4	0	0
d1672	d1672.a1	d1672.a1.a1	Chassy_SC_4973;N1P5Y8;P38428; Coupling of ubiquitin conjugation to ER degradation protein 1 - CUE1	0	0	0	0	0	1	0	0	1	0	0	1	0	0	0	0	1	0	0	0	0
c103	c103.a1	c103.a1.a1	Chassy_SC_4972;N1P3S8;P23301; Eukaryotic translation initiation factor 5A-1 - HYP2	12	27	28	32	34	17	14	24	29	27	39	20	17	12	29	27	30	14	43	16	15
c666	c666.a1	c666.a1.a1	Chassy_SC_4970;N1NYW0;P32843; Mitochondrial escape protein 2 - YME2	2	7	9	6	6	1	3	4	6	2	3	1	1	1	9	6	10	0	2	0	0
d1303	d1303.a1	d1303.a1.a1	Chassy_SC_497;N1NX70;Q02908; Elongator complex protein 3 - ELP3	0	0	1	1	0	1	0	0	1	2	0	0	0	0	2	1	1	0	3	0	0
b24	b24.a1	b24.a1.a1	Chassy_SC_4969;N1NXP6;P02829; ATP-dependent molecular chaperone HSP82 - HSP82	45	41	84	85	78	63	44	72	84	67	70	59	43	44	85	66	72	43	60	43	36
c642	c642.a1	c642.a1.a1	Chassy_SC_4968;N1P5B8;P53128; Methylenetetrahydrofolate reductase 2 - MET13	1	5	3	8	6	2	1	8	3	9	5	5	1	1	3	5	8	1	8	1	1
c839	c839.a1	c839.a1.a1	Chassy_SC_4967;N1P0K7;Q05029; Protein BCH1 - BCH1	0	1	4	4	0	4	0	3	6	4	1	3	0	1	3	6	6	0	2	0	0
c920	c920.a2	c920.a2.a1	Chassy_SC_4966;N1NX90;Q08985; Homocysteine S-methyltransferase 2 - SAM4	0	0	0	0	0	0	0	2	0	0	0	0	0	0	0	2	1	0	0	0	0
d1411	d1411.a1	d1411.a1.a1	Chassy_SC_4965;N1P538;Q12331; FAS1 domain-containing protein YDR262W - YDR262W	0	0	0	0	2	0	0	4	1	0	0	0	0	0	0	0	3	0	0	0	0
c800	c800.a1	c800.a1.a1	Chassy_SC_4962;N1P9D3;P38787; 2-dehydropantoate 2-reductase - PAN5	0	2	2	5	4	3	0	4	3	4	5	3	0	1	3	4	2	3	5	0	0
c654	c654.a1	c654.a1.a1	Chassy_SC_4961;N1P8X5;Q05359; Protein ERP1 - ERP1	2	5	5	7	7	4	2	4	4	4	5	5	1	1	5	6	4	3	4	2	1
c368	c368.a1	c368.a1.a1	Chassy_SC_496;N1P3A5;P47079; T-complex protein 1 subunit theta - CCT8	6	9	12	14	12	9	5	10	12	11	10	8	5	4	10	11	12	4	14	4	6
d1875	d1875.a1	d1875.a1.a1	Chassy_SC_4959;N1P9L1;P32792; UPF0744 protein YSC83 - YSC83	0	0	0	0	0	0	0	0	0	1	0	0	0	0	0	1	0	0	0	0	0
d1856	d1856.a1	d1856.a1.a1	Chassy_SC_4958;N1P9N0;P38344; Cytoplasmic 60S subunit biogenesis factor REI1 - REI1	0	1	0	0	0	0	0	0	0	0	0	0	0	0	0	0	0	0	1	0	0
d1664	d1664.a1	d1664.a1.a1	Chassy_SC_4957;N1P8V9;P38149; Probable di- and tripeptidase DUG2 - DUG2	0	0	2	1	0	0	0	0	0	1	0	0	0	0	0	0	0	0	0	0	0
d1680	d1680.a1	d1680.a1.a1	Chassy_SC_4955;N1P4L7;P43577; Glucosamine 6-phosphate N-acetyltransferase - GNA1	0	0	0	1	1	0	0	0	0	0	1	0	0	0	0	0	1	0	0	0	0
d1565	d1565.a1	d1565.a1.a1	Chassy_SC_4954;N1P9U1;P18411; Protein FUN14 - FUN14	0	0	2	1	0	0	0	0	0	0	0	0	0	0	1	1	1	0	0	0	0
d1398	d1398.a1	d1398.a1.a1	Chassy_SC_4953;N1P108;Q12133; Signal peptidase complex subunit SPC3 - SPC3	0	0	1	1	2	2	0	0	0	0	1	1	0	0	0	1	1	0	0	0	0
c898	c898.a1	c898.a1.a1	Chassy_SC_4951;N1P172;(P0CX28-P0CX27);60S ribosomal protein L42- NA	2	1	3	2	3	2	1	0	2	3	3	2	3	3	1	1	2	0	3	2	2
c196	c196.a1	c196.a1.a1	Chassy_SC_495;N1NZC2;P00175; Cytochrome b2, mitochondrial - CYB2	15	19	17	22	24	5	12	16	19	25	19	7	11	14	16	22	24	6	27	10	12
c322	c322.a1	c322.a1.a1	Chassy_SC_4947;N1P4I5;P15703; Glucan 1,3-beta-glucosidase - BGL2	8	9	11	11	10	15	10	9	11	13	10	16	10	7	8	10	16	12	14	7	11
d1508	d1508.a1	d1508.a1.a1	Chassy_SC_4945;N1NYV9;Q03799; 37S ribosomal protein S8, mitochondrial - MRPS8	0	1	0	1	1	0	0	0	0	0	1	0	0	0	0	1	1	0	1	0	0
d1623	d1623.a1	d1623.a1.a1	Chassy_SC_4943;N1P9M3;CENPK specific;No description in SC288c, annotation and gene name in CENPK: Dog2p -CENPK1137D_5440	0	0	1	0	0	0	0	0	0	0	0	0	0	0	0	1	2	0	1	0	0
d1719	d1719.a1	d1719.a1.a1	Chassy_SC_4942;N1PAX6;P38121; DNA polymerase alpha subunit B - POL12	0	0	0	1	0	0	0	0	0	0	0	0	0	0	0	0	0	0	2	0	0
c403	c403.a1	c403.a1.a1	Chassy_SC_4940;N1P9P7;P34223; UBX domain-containing protein 1 - SHP1	4	10	12	12	13	10	5	10	12	7	9	8	4	3	11	8	11	7	11	2	3
c988	c988.a1	c988.a1.a1	Chassy_SC_494;N1NZQ4;P28272; Dihydroorotate dehydrogenase (fumarate) - URA1	1	1	2	2	2	2	2	1	2	2	2	2	1	0	2	2	3	0	2	0	1
b67	b67.a1	b67.a1.a1	Chassy_SC_4939;N1P3Z8;Q12122; Homocitrate synthase, mitochondrial - LYS21	17	27	25	36	33	39	19	28	31	33	29	43	17	16	23	28	36	30	34	15	17
d1286	d1286.a1	d1286.a1.a1	Chassy_SC_4938;N1P014;Q07914; Mitochondrial import inner membrane translocase subunit TIM14 - PAM18	0	1	1	1	0	1	0	1	1	1	1	1	0	0	1	1	1	1	1	0	0
c668	c668.a1	c668.a1.a1	Chassy_SC_4935;N1NVJ5;P32795; Mitochondrial inner membrane i-AAA protease supercomplex subunit YME1 - YME1	2	5	5	8	6	3	2	3	5	8	0	5	1	2	5	6	6	1	6	0	0
c640	c640.a1	c640.a1.a1	Chassy_SC_4933;N1NXL4;P53633; Prenylated Rab acceptor 1 - YIP3	3	6	6	5	4	5	6	3	6	3	3	6	2	1	7	5	3	2	3	3	3
d1239	d1239.a1	d1239.a1.a1	Chassy_SC_4932;N1P586;P54860; E4 ubiquitin-protein ligase UFD2 - UFD2	0	0	1	3	0	1	0	0	0	3	0	4	0	0	1	0	2	0	1	0	0
b11	b11.a2	b11.a2.a1	Chassy_SC_4931;N1P8N4;P09435; Heat shock protein SSA3 - SSA3	34	47	47	40	54	22	34	50	56	43	65	23	29	32	44	54	65	23	37	27	27
c931	c931.a1	c931.a1.a1	Chassy_SC_4929;N1P3U4;P17891; Clathrin light chain - CLC1	0	6	4	1	4	1	0	1	2	1	7	2	0	0	3	0	3	1	2	0	0
d1031	d1031.a1	d1031.a1.a1	Chassy_SC_4927;N1NYM3;Q03655; Probable 1,3-beta-glucanosyltransferase GAS3 - GAS3	0	2	2	1	2	2	1	2	3	1	2	2	0	0	1	2	2	1	1	1	0
d1604	d1604.a1	d1604.a1.a1	Chassy_SC_4926;N1NXD0;P53898; Protein NSG2 - NSG2	0	2	0	1	0	0	0	0	0	0	0	0	0	0	1	1	0	0	0	0	0
c982	c982.a1	c982.a1.a1	Chassy_SC_4922;N1NYP2;Q99297; Mitochondrial 2-oxodicarboxylate carrier 2 - ODC2	2	2	3	2	2	3	1	3	1	0	3	1	0	0	2	3	4	1	0	0	0
d1705	d1705.a1	d1705.a1.a1	Chassy_SC_4921;N1NZA4;P36102; PAN2-PAN3 deadenylation complex subunit PAN3 - PAN3	0	0	1	0	0	1	0	0	0	0	0	0	0	0	0	0	0	0	1	0	0
c424	c424.a2	c424.a2.a1	Chassy_SC_4919;N1NYJ4;P26570; Serine/threonine-protein phosphatase PP-Z1 - PPZ1	0	1	1	3	1	1	0	1	1	2	1	1	0	0	1	1	2	1	1	0	0
c383	c383.a1	c383.a1.a1	Chassy_SC_4916;N1P4T9;P19262; Dihydrolipoyllysine-residue succinyltransferase component of 2-oxoglutarate dehydrogenase complex, mitochondrial - KGD2	4	12	12	13	10	7	4	10	12	14	14	8	3	3	10	11	13	4	16	3	2
d1107	d1107.a1	d1107.a1.a1	Chassy_SC_4914;N1P8A9;P38286; Very-long-chain 3-oxoacyl-CoA reductase - IFA38	1	2	2	1	1	1	0	1	2	0	1	2	0	0	1	3	4	0	1	0	0
c272	c272.a1	c272.a1.a1	Chassy_SC_4911;N1P0A4;P46680; Actin-interacting protein 1 - AIP1	4	15	18	19	15	10	5	17	16	17	14	13	4	2	15	16	26	6	22	4	3
d1512	d1512.a1	d1512.a1.a1	Chassy_SC_4910;N1NXP0;Q06090; 54S ribosomal protein L51, mitochondrial - MRPL51	0	0	1	1	0	1	0	0	1	0	1	0	0	0	0	1	0	0	1	0	0
c481	c481.a1	c481.a1.a1	Chassy_SC_491;N1NXL5;Q12074; Spermidine synthase - SPE3	3	8	8	10	12	6	2	11	8	9	8	7	4	1	8	11	12	2	9	1	1
c735	c735.a1	c735.a1.a1	Chassy_SC_4908;N1P5A4;Q01163; 37S ribosomal protein S23, mitochondrial - RSM23	0	4	2	5	9	4	1	4	4	5	5	3	1	1	1	4	3	2	5	0	0
d1478	d1478.a1	d1478.a1.a1	Chassy_SC_4905;N1PAB9;Q07629; Uncharacterized membrane protein YDL218W - YDL218W	0	0	3	0	0	0	0	0	1	0	0	0	0	0	2	1	1	0	0	0	0
d1812	d1812.a1	d1812.a1.a1	Chassy_SC_490;N1P4K6;P14682; Ubiquitin-conjugating enzyme E2-34 kDa - CDC34	0	0	0	1	0	0	0	0	1	0	0	0	0	0	0	0	0	0	0	0	0
c932	c932.a1	c932.a1.a1	Chassy_SC_4894;N1NY57;Q12452; 3-keto-steroid reductase - ERG27	0	4	1	2	5	5	0	3	0	1	1	5	0	0	1	1	4	4	1	0	0
c703	c703.a1	c703.a1.a1	Chassy_SC_4891;N1P2B9;Q06489; Methylthioribose-1-phosphate isomerase - MRI1	1	5	5	5	6	3	1	7	3	6	3	3	1	0	2	6	7	2	6	0	0
c816	c816.a1	c816.a1.a1	Chassy_SC_4887;N1P1I9;P11914; Mitochondrial-processing peptidase subunit alpha - MAS2	2	3	4	3	2	2	1	2	4	2	4	3	0	1	3	3	5	3	3	0	1
c972	c972.a1	c972.a1.a1	Chassy_SC_4886;N1P798;P32643; Trans-aconitate 3-methyltransferase - TMT1	0	4	3	0	3	0	0	4	2	0	3	0	0	0	3	4	8	0	0	0	0
c466	c466.a1	c466.a1.a1	Chassy_SC_4885;N1P5T7;P07277; Mevalonate kinase - ERG12	3	9	6	6	9	12	4	8	12	5	6	10	2	3	9	10	13	7	8	2	2
c174	c174.a1	c174.a1.a1	Chassy_SC_4883;N1NVM0;P06738; Glycogen phosphorylase - GPH1	10	25	26	7	21	28	9	28	24	7	28	23	5	6	26	30	25	20	5	7	9
d1922	d1922.a1	d1922.a1.a1	Chassy_SC_4882;N1P063;P35201; Protein MIF2 - MIF2	0	0	0	0	0	0	0	0	0	0	0	1	0	0	0	0	0	0	0	0	0
c767	c767.a1	c767.a1.a1	Chassy_SC_4881;N1PAF0;Q12443; Reticulon-like protein 2 - RTN2	2	4	4	6	4	0	2	4	4	3	4	0	2	1	5	4	7	0	0	1	1
d1094	d1094.a1	d1094.a1.a1	Chassy_SC_488;N1PAX5;P38166; Protein transport protein SFT2 - SFT2	0	3	2	1	2	0	0	3	2	2	2	1	0	0	2	2	1	0	1	0	0
c955	c955.a1	c955.a1.a1	Chassy_SC_4874;N1P7Y5;P38217; Importin subunit beta-2 - KAP104	2	2	3	3	0	2	0	1	3	2	0	3	1	1	4	1	3	1	3	0	1
c394	c394.a1	c394.a1.a1	Chassy_SC_4872;N1P3L3;Q3E757; 60S ribosomal protein L11-B - RPL11B	5	10	10	9	12	11	4	10	9	11	8	8	8	5	8	10	10	9	9	7	4
d1257	d1257.a1	d1257.a1.a1	Chassy_SC_4870;N1NY36;P32802; Transmembrane 9 superfamily member 1 - EMP70	0	1	1	1	1	2	0	1	1	1	1	0	0	0	1	1	1	1	1	0	0
d1414	d1414.a1	d1414.a1.a1	Chassy_SC_487;N1P9V8;P35180; Mitochondrial import receptor subunit TOM20 - TOM20	0	0	1	3	1	0	0	1	1	1	1	0	0	0	0	1	0	0	0	0	0
c223	c223.a1	c223.a1.a1	Chassy_SC_4869;N1PA85;P32481; Eukaryotic translation initiation factor 2 subunit gamma - GCD11	11	15	17	20	16	17	11	17	16	22	16	19	12	10	17	15	19	12	20	9	6
d1085	d1085.a1	d1085.a1.a1	Chassy_SC_4868;N1P3F0;P39744; Nucleolar complex protein 2 - NOC2	0	0	1	2	1	3	2	1	0	1	1	3	0	0	1	1	4	1	1	1	0
b51	b51.a1	b51.a1.a1	Chassy_SC_4863;N1PA00;P22137; Clathrin heavy chain - CHC1	25	40	44	41	39	46	19	46	50	54	45	52	18	15	39	53	53	29	47	12	17
c636	c636.a1	c636.a1.a1	Chassy_SC_4862;N1NY73;Q04371; Protein-glutamate O-methyltransferase - YMR027W	3	6	5	10	5	5	2	2	7	7	3	4	2	1	5	5	5	1	5	2	1
d1753	d1753.a1	d1753.a1.a1	Chassy_SC_4856;N1P405;P53262; V0 assembly protein 1 - VOA1	0	0	0	0	0	0	0	0	0	0	0	0	0	0	0	1	2	0	0	0	0
d1321	d1321.a1	d1321.a1.a1	Chassy_SC_4851;N1P7U4;P25586; KRR1 small subunit processome component - KRR1	0	0	1	1	0	1	0	1	1	1	1	1	0	0	2	0	1	0	1	0	0
d1626	d1626.a1	d1626.a1.a1	Chassy_SC_4848;N1PAK2;P36973; Adenine phosphoribosyltransferase 2 - APT2	0	0	0	0	1	0	0	1	1	0	0	0	0	0	0	0	1	0	1	0	0
b40	b40.a2	b40.a2.a1	Chassy_SC_4846;N1P8P8;CENPK specific;No description in SC288c, annotation and gene name in CENPK: Pyc2p -CENPK1137D_4774	3	4	5	5	5	4	3	4	4	6	4	5	4	3	6	7	9	3	5	4	5
d1375	d1375.a1	d1375.a1.a1	Chassy_SC_4845;N1P4H8;P43561; Iron transport multicopper oxidase FET5 - FET5	1	0	2	0	1	0	0	0	0	1	1	0	0	0	2	0	2	0	1	0	0
c912	c912.a1	c912.a1.a1	Chassy_SC_4842;N1P851;P36147; Presequence translocated-associated motor subunit PAM17, mitochondrial - PAM17	1	2	3	1	3	2	1	2	2	3	4	2	1	1	1	3	4	1	2	0	1
d1320	d1320.a1	d1320.a1.a1	Chassy_SC_4841;N1P626;Q03559; Uncharacterized protein YMR295C - YMR295C	0	1	1	1	2	0	0	0	0	1	1	1	0	0	1	1	1	0	1	0	0
d1617	d1617.a1	d1617.a1.a1	Chassy_SC_484;N1NY14;P23503; Cytosolic Fe-S cluster assembly factor NAR1 - NAR1	0	0	0	0	0	2	0	0	1	0	0	1	0	0	0	0	0	1	0	0	0
c379	c379.a1	c379.a1.a1	Chassy_SC_4838;N1P1N6;P07278; cAMP-dependent protein kinase regulatory subunit - BCY1	8	12	11	8	10	7	5	10	15	8	13	5	5	5	13	11	12	4	13	7	4
c760	c760.a1	c760.a1.a1	Chassy_SC_4837;N1NZ33;Q12496; Uncharacterized protein YOL098C - YOL098C	1	5	4	5	4	4	2	2	2	2	1	5	0	1	7	4	4	1	4	0	0
d1458	d1458.a1	d1458.a1.a1	Chassy_SC_4836;N1NXY9;Q08959; Phosphatidylglycerol phospholipase C - PGC1	1	0	1	1	0	1	1	0	0	0	0	1	0	0	0	0	0	1	1	0	0
c999	c999.a1	c999.a1.a1	Chassy_SC_4835;N1NW93;P38688; Signal recognition particle subunit SRP72 - SRP72	1	2	1	4	0	1	1	2	4	3	0	2	0	1	1	3	5	0	0	0	0
d1957	d1957.a1	d1957.a1.a1	Chassy_SC_4833;N1P9A9;P25358; Elongation of fatty acids protein 2 - ELO2	0	0	0	0	0	1	0	0	0	0	0	0	0	0	0	0	0	0	0	0	0
d1245	d1245.a1	d1245.a1.a1	Chassy_SC_4832;N1P6R4;Q03976; 37S ribosomal protein S24, mitochondrial - RSM24	0	0	1	1	1	1	0	1	1	1	3	1	0	0	1	1	1	0	1	0	0
c941	c941.a1	c941.a1.a1	Chassy_SC_483;N1NW71;P20435; DNA-directed RNA polymerases I, II, and III subunit RPABC2 - RPO26	0	2	3	2	2	2	1	2	3	2	2	2	1	1	2	2	3	1	2	1	1
d1771	d1771.a1	d1771.a1.a1	Chassy_SC_4825;N1P1F8;P47083; U3 small nucleolar RNA-associated protein MPP10 - MPP10	0	0	0	0	0	0	0	0	0	0	2	0	0	0	0	0	1	0	0	0	0
c143	c143.a1	c143.a1.a1	Chassy_SC_4824;N1P987;P38998; Saccharopine dehydrogenase [NAD(+), L-lysine-forming] - LYS1	15	21	21	29	24	16	13	25	21	26	22	20	12	13	17	23	32	16	26	11	13
c255	c255.a1	c255.a1.a1	Chassy_SC_4820;N1P2C2;P53278; Uncharacterized protein YGR130C - YGR130C	10	15	17	17	21	5	9	16	19	12	17	8	7	6	13	20	24	7	16	9	8
d1338	d1338.a1	d1338.a1.a1	Chassy_SC_4818;N1NWU1;Q12314; Protein arginine N-methyltransferase SFM1 - SFM1	0	1	1	2	0	0	0	2	1	0	1	0	0	0	1	2	1	0	0	0	0
c574	c574.a2	c574.a2.a1	Chassy_SC_4816;N1P0Y2;CENPK specific;No description in SC288c, annotation and gene name in CENPK: 40S ribosomal protein S21 -CENPK1137D_1066	3	6	4	7	7	4	2	7	1	5	7	3	3	2	3	4	7	1	8	2	2
c115	c115.a1	c115.a1.a1	Chassy_SC_4811;N1P8C7;P38249; Eukaryotic translation initiation factor 3 subunit A - RPG1	20	21	27	27	25	27	18	24	27	26	28	26	13	16	24	30	30	22	33	11	12
c548	c548.a1	c548.a1.a1	Chassy_SC_481;N1NYJ6;P39926; Protein SSO2 - SSO2	2	6	5	5	4	5	4	4	7	5	5	6	3	3	4	5	6	2	5	2	2
d1181	d1181.a1	d1181.a1.a1	Chassy_SC_4809;N1P2B8;Q02629; Nucleoporin NUP100/NSP100 - NUP100	1	1	1	1	1	1	0	1	1	2	1	2	0	0	1	1	2	0	2	0	0
b16	b16.a1	b16.a1.a1	Chassy_SC_4808;N1P8W3;P00830; ATP synthase subunit beta, mitochondrial - ATP2	52	76	74	101	97	74	55	85	76	90	88	86	49	51	63	75	90	65	114	38	40
d1643	d1643.a1	d1643.a1.a1	Chassy_SC_4807;N1P6X9;P17064; Purine-cytosine permease FCY2 - FCY2	0	0	0	0	0	1	0	0	0	0	0	1	0	0	0	1	0	1	0	0	0
c994	c994.a1	c994.a1.a1	Chassy_SC_4806;N1P385;P27466; Calcium/calmodulin-dependent protein kinase I - CMK1	0	0	3	0	1	9	0	2	1	0	0	9	0	0	1	0	1	5	0	0	0
d1466	d1466.a1	d1466.a1.a1	Chassy_SC_4804;N1P443;P40157; Vacuolar import and degradation protein 27 - VID27	0	1	1	0	1	0	0	1	0	0	0	1	0	0	1	1	1	0	0	0	0
d1826	d1826.a1	d1826.a1.a1	Chassy_SC_4799;N1P9F3;P38251; Replication factor C subunit 5 - RFC5	0	0	1	0	0	0	0	0	0	0	0	0	0	0	0	1	0	0	0	0	0
d1531	d1531.a1	d1531.a1.a1	Chassy_SC_4787;N1P5G2;P33331; Nuclear transport factor 2 - NTF2	0	1	1	1	1	0	0	0	0	0	1	0	0	0	0	0	1	0	1	0	0
d1591	d1591.a1	d1591.a1.a1	Chassy_SC_4783;N1P5X0;P53276; U3 small nucleolar RNA-associated protein 8 - UTP8	0	0	1	1	0	1	0	0	0	1	0	1	0	0	0	0	0	0	1	0	0
c227	c227.a1	c227.a1.a1	Chassy_SC_4782;N1NXM1;Q05022; rRNA biogenesis protein RRP5 - RRP5	4	18	23	25	25	23	2	20	18	14	20	24	1	2	10	23	26	9	27	1	1
c799	c799.a1	c799.a1.a1	Chassy_SC_4778;N1NYN1;P54000; RNA polymerase II transcriptional coactivator SUB1 - SUB1	0	2	5	7	2	3	0	1	3	6	2	6	0	0	3	3	4	2	4	0	0
d1973	d1973.a1	d1973.a1.a1	Chassy_SC_4771;N1P7H4;P11433; Cell division control protein 24 - CDC24	0	0	0	0	0	1	0	0	0	0	0	0	0	0	0	0	0	0	0	0	0
d1276	d1276.a1	d1276.a1.a1	Chassy_SC_4770;N1P235;P53224; Protein ORM1 - ORM1	1	1	0	1	1	0	0	1	1	1	1	1	1	0	1	1	1	1	0	0	0
c211	c211.a1	c211.a1.a1	Chassy_SC_477;N1P9T9;P31373; Cystathionine gamma-lyase - CYS3	10	11	14	22	23	17	9	17	17	26	17	28	7	5	9	17	23	17	29	5	8
c530	c530.a1	c530.a1.a1	Chassy_SC_4769;N1NYJ0;Q99287; Protein SEY1 - SEY1	3	7	6	7	6	9	1	5	8	7	3	8	3	3	11	9	8	5	8	1	1
d1953	d1953.a1	d1953.a1.a1	Chassy_SC_4765;N1P8N5;P47104; Regulator of V-ATPase in vacuolar membrane protein 1 - RAV1	0	0	0	0	0	0	0	0	0	0	0	0	0	0	0	0	1	0	0	0	0
a3	a3.a1	a3.a1.a1	Chassy_SC_4763;N1P8G0;P02994; Elongation factor 1-alpha - TEF1	87	135	141	135	161	135	85	148	156	151	157	151	87	82	128	135	191	111	159	76	81
d1132	d1132.a1	d1132.a1.a1	Chassy_SC_4761;N1P1Z9;P43639; Casein kinase II subunit beta - CKB1	0	2	2	2	1	1	0	1	2	1	1	2	0	0	0	2	2	0	3	0	0
c844	c844.a1	c844.a1.a1	Chassy_SC_4760;N1NVJ4;Q12233; ATP synthase subunit g, mitochondrial - ATP20	2	1	3	5	3	3	2	2	2	4	3	2	1	0	1	3	5	1	3	1	0
b60	b60.a1	b60.a1.a1	Chassy_SC_4758;N1P674;Q00055; Glycerol-3-phosphate dehydrogenase [NAD(+)] 1 - GPD1	20	15	20	66	20	13	18	17	19	69	18	11	19	16	19	19	21	8	80	16	16
c822	c822.a1	c822.a1.a1	Chassy_SC_4755;N1P601;P41920; Ran-specific GTPase-activating protein 1 - YRB1	1	4	2	3	5	3	0	2	4	2	4	1	0	0	4	4	5	3	2	1	0
d2006	d2006.a1	d2006.a1.a1	Chassy_SC_4754;N1P9Z0;P53309; Clathrin coat assembly protein AP180B - YAP1802	0	0	0	0	0	0	0	0	0	0	0	0	0	0	1	0	0	0	0	0	0
d1877	d1877.a1	d1877.a1.a1	Chassy_SC_4752;N1P9Y8;P17442; Phosphate system positive regulatory protein PHO81 - PHO81	0	0	0	1	0	0	0	0	0	0	0	0	0	0	0	0	0	0	1	0	0
a2	a2.a1	a2.a1.a1	Chassy_SC_4750;N1NZ13;P46367; Potassium-activated aldehyde dehydrogenase, mitochondrial - ALD4	93	140	136	140	161	52	91	144	151	127	168	58	99	96	129	145	168	43	142	95	92
d1899	d1899.a1	d1899.a1.a1	Chassy_SC_4749;N1NXT7;P53739; Flippase kinase 1 - FPK1	0	0	1	0	0	0	0	0	0	0	0	0	0	0	0	0	0	0	0	0	0
c975	c975.a1	c975.a1.a1	Chassy_SC_4748;N1P992;CENPK specific;No description in SC288c, annotation and gene name in CENPK: Leu2p -CENPK1137D_4480	0	4	2	3	3	2	0	2	3	2	2	3	0	0	1	0	4	0	3	0	0
d1451	d1451.a1	d1451.a1.a1	Chassy_SC_4743;N1P5I3;P53173; ER-derived vesicles protein ERV14 - ERV14	0	1	0	1	1	1	1	0	0	0	1	0	1	0	0	1	1	0	0	0	0
c300	c300.a1	c300.a1.a1	Chassy_SC_4738;N1P1A6;Q03558; NADPH dehydrogenase 2 - OYE2	2	9	6	16	13	24	2	4	13	12	13	29	1	2	10	10	1	21	11	3	3
d1984	d1984.a1	d1984.a1.a1	Chassy_SC_4734;N1NXW2;P53753; Endo-1,3(4)-beta-glucanase 1 - DSE4	0	0	0	0	0	0	0	0	0	0	0	0	0	0	1	0	0	0	0	0	0
c212	c212.a1	c212.a1.a1	Chassy_SC_4731;N1P068;Q05050; Eisosome protein 1 - EIS1	15	19	31	15	23	2	15	14	19	15	29	6	9	8	25	23	25	3	14	10	9
c684	c684.a1	c684.a1.a1	Chassy_SC_4726;N1P638;P22803; Thioredoxin-2 - TRX2	3	4	5	4	5	1	1	5	4	2	5	0	0	2	4	4	5	0	2	2	2
d1472	d1472.a1	d1472.a1.a1	Chassy_SC_4715;N1NVL9;Q06449; [PSI+] inducibility protein 3 - PIN3	0	1	4	1	0	0	0	0	0	0	1	0	0	0	1	0	0	0	0	0	0
c357	c357.a1	c357.a1.a1	Chassy_SC_4714;N1P814;P25349; Flavoprotein-like protein YCP4 - YCP4	6	11	13	10	11	9	8	10	15	11	11	8	6	7	11	12	14	6	10	7	5
c621	c621.a1	c621.a1.a1	Chassy_SC_4713;N1P801;CENPK specific;No description in SC288c, annotation and gene name in CENPK: Leu2p -CENPK1137D_4479	2	5	4	7	5	4	3	8	5	5	4	6	2	3	5	4	5	4	4	3	2
c467	c467.a1	c467.a1.a1	Chassy_SC_4712;N1P2D5;P35732; RNA polymerase II degradation factor 1 - DEF1	5	7	9	7	9	5	5	7	7	12	9	6	3	3	9	9	11	6	11	3	2
c165	c165.a1	c165.a1.a1	Chassy_SC_4707;N1P9C5;P38219; Obg-like ATPase 1 - OLA1	14	18	19	24	21	21	13	18	23	26	21	20	14	12	22	20	20	13	25	7	11
d1409	d1409.a1	d1409.a1.a1	Chassy_SC_4700;N1PA90;P52891; Nucleoporin NUP84 - NUP84	0	0	2	0	0	2	0	0	1	0	0	0	1	0	3	1	0	0	0	0	0
d1077	d1077.a1	d1077.a1.a1	Chassy_SC_47;N1P5E5;P53145; Large subunit GTPase 1 - LSG1	0	1	3	2	3	1	0	2	1	1	1	1	0	0	1	2	3	1	2	0	0
d1111	d1111.a1	d1111.a1.a1	Chassy_SC_4698;N1P358;P47045; Mitochondrial import inner membrane translocase subunit TIM54 - TIM54	0	0	3	4	0	1	0	1	1	3	1	1	0	0	1	1	2	0	4	0	0
c772	c772.a1	c772.a1.a1	Chassy_SC_4697;N1P2P9;P28007; H/ACA ribonucleoprotein complex subunit 1 - GAR1	2	3	3	3	5	3	2	5	3	3	4	4	0	0	2	4	4	3	4	1	0
d1729	d1729.a1	d1729.a1.a1	Chassy_SC_4692;N1NXX5;P32462; Delta(14)-sterol reductase - ERG24	0	1	0	0	0	0	0	0	0	0	0	0	0	0	0	1	1	0	0	0	0
c213	c213.a1	c213.a1.a1	Chassy_SC_4691;N1P6H0;P22855; Alpha-mannosidase - AMS1	10	22	22	16	21	10	13	20	25	18	23	10	8	7	22	23	32	4	16	1	5
d1707	d1707.a1	d1707.a1.a1	Chassy_SC_4688;N1P3Y4;P52871; Protein transport protein SBH2 - SBH2	0	1	0	0	1	0	0	0	0	0	0	0	0	0	0	0	1	0	0	0	0
c271	c271.a1	c271.a1.a1	Chassy_SC_4685;N1P145;P47117; Actin-related protein 3 - ARP3	6	13	16	18	12	14	4	18	17	15	16	15	5	5	14	17	21	11	16	5	4
d2046	d2046.a1	d2046.a1.a1	Chassy_SC_4684;N1P025;Q06479;|reversed F-box protein YLR352W - YLR352W	0	0	0	1	0	0	0	0	0	0	0	0	0	0	0	0	0	0	0	0	0
c696	c696.a1	c696.a1.a1	Chassy_SC_4683;N1NWA5;P38996; Nuclear polyadenylated RNA-binding protein 3 - NAB3	3	4	5	5	3	4	2	5	3	4	5	2	2	3	6	4	4	1	3	4	1
b71	b71.a2	b71.a2.a1	Chassy_SC_4682;N1P675;P23248; 40S ribosomal protein S1-B - RPS1B	17	28	31	37	37	28	17	29	24	35	28	33	20	16	26	32	29	23	33	15	15
d1816	d1816.a1	d1816.a1.a1	Chassy_SC_4681;N1P4V6;P38869; Protein SVP26 - SVP26	0	0	0	0	0	0	0	0	0	0	0	0	0	0	0	1	0	1	0	0	0
c616	c616.a1	c616.a1.a1	Chassy_SC_4680;N1P029;P00044; Cytochrome c iso-1 - CYC1	5	6	5	5	7	3	4	5	5	4	4	2	2	3	5	6	6	0	6	4	3
c310	c310.a1	c310.a1.a1	Chassy_SC_4679;N1P8Z5;P28274; CTP synthase 1 - URA7	3	9	8	12	10	8	4	10	11	11	11	7	3	1	8	8	10	6	12	2	1
c437	c437.a1	c437.a1.a1	Chassy_SC_4678;N1P9L5;P17423; Homoserine kinase - THR1	5	11	7	10	8	12	2	10	10	8	7	11	2	3	8	11	13	6	9	2	3
d1847	d1847.a1	d1847.a1.a1	Chassy_SC_4677;N1P7W1;P36090; Uncharacterized protein ANR2 - ANR2	0	0	0	1	0	0	0	0	0	1	0	0	0	0	0	0	0	0	0	0	0
d1509	d1509.a1	d1509.a1.a1	Chassy_SC_4676;N1P445;Q05166; Nucleoporin ASM4 - ASM4	0	0	1	0	1	1	0	1	0	1	1	0	0	0	1	0	0	0	0	0	0
c968	c968.a2	c968.a2.a1	Chassy_SC_4675;N1NVZ4;P17157; Cyclin-dependent protein kinase PHO85 - PHO85	0	0	1	1	0	0	0	0	0	1	0	0	0	0	0	1	0	1	0	0	0
d1101	d1101.a1	d1101.a1.a1	Chassy_SC_4652;N1PAI8;Q06385; Vacuolar protein sorting-associated protein 74 - VPS74	0	1	1	1	1	2	0	1	1	3	2	3	0	0	1	2	2	1	1	0	0
d1115	d1115.a1	d1115.a1.a1	Chassy_SC_465;N1P9X9;P53301; Probable glycosidase CRH1 - CRH1	0	0	3	2	2	1	0	0	4	1	0	1	0	0	3	0	2	0	3	0	0
c298	c298.a2	c298.a2.a1	Chassy_SC_4647;N1P2R5;P38816; Thioredoxin reductase 2, mitochondrial - TRR2	0	4	4	4	4	4	0	6	5	3	4	5	0	0	3	3	5	2	4	0	0
d2073	d2073.a1	d2073.a1.a1	Chassy_SC_4646;N1P1U8;Q02725;|reversed Vacuolar transporter chaperone 3 - VTC3	0	0	0	0	0	0	0	0	0	0	0	0	0	0	0	0	0	0	1	0	0
d1237	d1237.a1	d1237.a1.a1	Chassy_SC_4645;N1NXK3;P53946; Actin-related protein 5 - ARP5	0	1	1	2	1	0	0	1	1	1	2	0	0	0	0	2	3	0	1	0	0
c217	c217.a1	c217.a1.a1	Chassy_SC_4644;N1P4R7;P43616; Cys-Gly metallodipeptidase DUG1 - DUG1	7	14	15	19	23	18	7	17	17	25	20	21	8	8	10	20	19	13	27	9	8
c435	c435.a1	c435.a1.a1	Chassy_SC_4643;N1P3Y8;P06115; Catalase T - CTT1	7	4	1	19	17	0	7	1	0	23	14	0	6	6	0	15	4	0	21	7	6
d1962	d1962.a1	d1962.a1.a1	Chassy_SC_4642;N1P0L0;P35724; Manganese resistance protein MNR2 - MNR2	0	0	0	0	0	0	0	0	0	0	0	0	0	0	0	0	1	0	0	0	0
d1779	d1779.a1	d1779.a1.a1	Chassy_SC_4641;N1NWJ5;P28000; DNA-directed RNA polymerases I and III subunit RPAC2 - RPC19	0	0	0	0	0	0	0	0	0	0	1	0	0	0	0	0	1	0	0	0	0
d1519	d1519.a1	d1519.a1.a1	Chassy_SC_4640;N1P8K5;P38288; Protein TOS1 - TOS1	0	0	0	3	0	1	0	0	1	0	1	0	0	0	0	0	0	0	1	0	0
d1212	d1212.a1	d1212.a1.a1	Chassy_SC_4639;N1P2T7;P18962; Dipeptidyl aminopeptidase B - DAP2	0	2	0	1	2	0	0	1	0	1	3	1	0	0	0	4	1	0	1	0	0
c936	c936.a1	c936.a1.a1	Chassy_SC_4638;N1P193;P80428; Actin-related protein 4 - ARP4	0	0	4	0	3	1	0	4	5	3	3	0	0	0	3	2	3	1	6	0	0
d1761	d1761.a1	d1761.a1.a1	Chassy_SC_4635;N1P2Y9;P53121; Putative flavin carrier protein 3 - FLC3	0	0	1	0	0	0	0	0	0	1	0	0	0	0	1	0	0	0	0	0	0
d1895	d1895.a1	d1895.a1.a1	Chassy_SC_4633;N1P4H6;P53329;|reversed Uncharacterized protein YGR273C - YGR273C	0	0	0	0	0	0	0	0	0	0	0	0	0	0	0	0	0	0	1	0	0
d1927	d1927.a1	d1927.a1.a1	Chassy_SC_4632;N1P751;P40078; Ribosome biogenesis protein NSA2 - NSA2	0	0	0	0	0	1	0	0	0	0	0	0	0	0	0	0	0	0	0	0	0
d1479	d1479.a1	d1479.a1.a1	Chassy_SC_4627;N1NW22;Q02931; NET1-associated nuclear protein 1 - NAN1	1	0	2	1	0	2	0	0	0	0	0	0	0	0	0	0	0	1	1	0	0
d1396	d1396.a1	d1396.a1.a1	Chassy_SC_4626;N1P5U8;Q12306; Ubiquitin-like protein SMT3 - SMT3	0	1	2	2	0	0	0	1	0	0	0	0	1	0	1	0	1	0	0	0	1
c502	c502.a1	c502.a1.a1	Chassy_SC_4625;N1PA44;P21524; Ribonucleoside-diphosphate reductase large chain 1 - RNR1	4	8	7	9	8	5	5	8	9	6	7	6	3	2	8	10	9	5	7	3	2
d1974	d1974.a1	d1974.a1.a1	Chassy_SC_4624;N1P8X1;P47164; Cystathionine gamma-synthase - STR2	0	1	0	0	0	0	0	0	0	0	0	0	0	0	0	0	0	0	0	0	0
d1258	d1258.a1	d1258.a1.a1	Chassy_SC_4623;N1P749;P38144; ISWI chromatin-remodeling complex ATPase ISW1 - ISW1	0	1	1	0	1	1	0	1	1	0	0	1	0	0	2	1	4	0	1	0	0
c894	c894.a1	c894.a1.a1	Chassy_SC_4618;N1P9B2;P40485; Phosphatidylinositol 4,5-bisphosphate-binding protein SLM1 - SLM1	2	2	6	3	4	1	1	2	2	3	1	1	1	0	2	2	2	0	5	1	1
d1511	d1511.a1	d1511.a1.a1	Chassy_SC_4615;N1NZ78;P35729; Nucleoporin NUP120 - NUP120	0	1	2	1	0	0	0	0	0	0	0	2	0	0	1	0	0	0	0	0	0
c857	c857.a1	c857.a1.a1	Chassy_SC_4614;N1P5L4;P03962; Orotidine 5'-phosphate decarboxylase - URA3	0	3	3	6	5	0	0	3	4	2	5	2	0	0	0	2	5	0	6	0	0
c300	c300.a2	c300.a2.a1	Chassy_SC_4611;N1P1D3;P41816; NADPH dehydrogenase 3 - OYE3	0	3	0	1	11	3	0	0	1	1	12	2	0	0	0	9	0	2	1	0	0
c103	c103.a2	c103.a2.a1	Chassy_SC_4609;N1P131;P19211; Eukaryotic translation initiation factor 5A-2 - ANB1	1	1	1	1	1	4	1	1	1	1	3	6	1	1	1	1	2	3	2	1	1
d1363	d1363.a1	d1363.a1.a1	Chassy_SC_4608;N1P796;Q05933; Actin-related protein 2/3 complex subunit 3 - ARC18	1	0	2	1	1	1	0	0	0	0	0	0	0	0	2	1	2	0	0	0	0
c786	c786.a1	c786.a1.a1	Chassy_SC_4607;N1NXJ8;P32352; C-8 sterol isomerase - ERG2	3	3	2	3	2	3	3	2	2	2	3	5	2	2	1	4	4	2	3	2	2
c649	c649.a1	c649.a1.a1	Chassy_SC_4605;N1P7N5;P33775; Dolichyl-phosphate-mannose--protein mannosyltransferase 1 - PMT1	5	4	5	4	1	8	4	2	5	2	2	7	2	2	6	6	7	6	1	2	1
d1657	d1657.a1	d1657.a1.a1	Chassy_SC_4604;N1P5S8;P23369; 54S ribosomal protein L25, mitochondrial - MRPL25	0	0	0	0	1	0	0	0	0	0	3	0	0	0	0	0	0	0	0	0	0
d1304	d1304.a1	d1304.a1.a1	Chassy_SC_4603;N1NXP7;P33309; Protein DOM34 - DOM34	0	1	1	1	1	0	0	1	0	2	1	1	0	0	0	0	1	0	3	0	0
c417	c417.a1	c417.a1.a1	Chassy_SC_4602;N1NWX8;P53839; Glyoxylate reductase 1 - GOR1	4	5	6	19	17	1	5	7	4	18	15	2	4	3	6	17	7	1	22	3	2
c739	c739.a1	c739.a1.a1	Chassy_SC_4601;N1P7X1;Q12165; ATP synthase subunit delta, mitochondrial - ATP16	0	4	3	5	4	3	0	3	5	6	4	5	2	0	0	4	8	3	4	0	0
d1059	d1059.a1	d1059.a1.a1	Chassy_SC_4596;N1P314;P06785; Thymidylate synthase - CDC21	0	1	2	2	2	2	0	3	1	3	1	2	0	0	1	1	2	1	2	0	0
d1452	d1452.a1	d1452.a1.a1	Chassy_SC_4594;N1P2D7;P13856; Ras-related protein RSR1 - RSR1	0	0	1	1	0	0	0	1	1	0	0	1	0	0	1	1	1	0	1	0	0
d2001	d2001.a1	d2001.a1.a1	Chassy_SC_4592;N1P8I9;P43638; MAP-homologous protein 1 - MHP1	0	0	0	0	0	0	0	0	0	0	0	1	0	0	0	0	0	0	0	0	0
d1906	d1906.a1	d1906.a1.a1	Chassy_SC_4591;N1NWC3;Q08217;|reversed Serine/threonine-protein kinase PSK2 - PSK2	0	0	0	0	0	0	0	0	0	0	0	1	0	0	0	0	0	0	0	0	0
b44	b44.a1	b44.a1.a1	Chassy_SC_4588;N1NY19;P37291; Serine hydroxymethyltransferase, cytosolic - SHM2	21	29	27	31	40	38	15	32	27	30	41	37	17	19	29	34	42	28	35	18	18
c239	c239.a1	c239.a1.a1	Chassy_SC_4584;N1NX01;P28241; Isocitrate dehydrogenase [NAD] subunit 2, mitochondrial - IDH2	10	12	16	25	17	13	9	21	15	20	13	12	9	9	12	17	18	11	22	8	8
d1467	d1467.a1	d1467.a1.a1	Chassy_SC_4583;N1P113;P38789; Ribosome biogenesis protein SSF1 - SSF1	1	0	0	2	1	1	0	1	0	0	1	0	0	0	0	0	0	0	1	0	0
d1593	d1593.a1	d1593.a1.a1	Chassy_SC_458;N1P594;P39945; Protein AST2 - AST2	0	1	2	0	0	0	0	0	1	0	0	0	0	0	0	0	2	0	0	0	0
c422	c422.a1	c422.a1.a1	Chassy_SC_4579;N1P5T3;P23644; Mitochondrial import receptor subunit TOM40 - TOM40	6	9	9	8	8	9	5	10	8	12	9	8	4	4	7	6	14	7	17	4	3
d1874	d1874.a1	d1874.a1.a1	Chassy_SC_4578;N1P0T9;P40469; DNA repair/transcription protein MET18/MMS19 - MET18	0	0	1	1	0	0	0	0	0	0	0	0	0	0	0	0	0	0	0	0	0
c120	c120.a1	c120.a1.a1	Chassy_SC_4574;N1P5K3;P00931; Tryptophan synthase - TRP5	13	27	25	32	34	26	14	28	22	25	29	25	10	15	22	24	35	19	29	13	13
c142	c142.a1	c142.a1.a1	Chassy_SC_4572;N1P5G7;P39518; Long-chain-fatty-acid--CoA ligase 2 - FAA2	14	25	27	31	25	6	13	26	29	31	25	5	13	12	25	27	31	5	29	9	13
c889	c889.a1	c889.a1.a1	Chassy_SC_4571;N1P348;P32902; 37S ribosomal protein MRP4, mitochondrial - MRP4	0	4	0	5	6	3	0	3	0	2	1	4	0	0	0	2	5	0	8	0	0
c130	c130.a1	c130.a1.a1	Chassy_SC_4570;N1NYL3;Q03690; Clustered mitochondria protein 1 - CLU1	15	25	24	28	18	18	16	27	25	28	23	22	12	13	20	26	33	13	32	10	10
d1124	d1124.a1	d1124.a1.a1	Chassy_SC_4568;N1NZD6;Q03705; EKC/KEOPS complex subunit CGI121 - CGI121	0	1	1	1	4	2	0	0	0	1	2	1	0	0	1	2	2	1	3	0	0
d1159	d1159.a1	d1159.a1.a1	Chassy_SC_4567;N1P7V6;Q12008; Phosphoglycerate mutase 2 - GPM2	0	0	1	3	1	0	0	1	2	0	1	3	0	0	2	2	0	1	3	0	0
d1073	d1073.a1	d1073.a1.a1	Chassy_SC_4565;N1P254;P53045; Methylsterol monooxygenase - ERG25	0	2	1	0	3	2	0	2	2	0	2	2	0	0	0	3	3	3	0	0	0
d1015	d1015.a1	d1015.a1.a1	Chassy_SC_4561;N1P3C9;P47089; Translation machinery-associated protein 22 - TMA22	0	0	2	1	3	0	0	1	2	1	5	0	0	0	1	5	3	0	5	0	0
d1373	d1373.a1	d1373.a1.a1	Chassy_SC_4558;N1P2N5;P14741; Translation initiation factor eIF-2B subunit alpha - GCN3	0	0	0	2	2	0	0	0	1	0	0	1	0	0	0	0	3	1	1	0	0
c550	c550.a1	c550.a1.a1	Chassy_SC_4554;N1NWH1;P38616; Protein YGP1 - YGP1	6	9	9	8	8	0	4	7	10	8	9	0	3	1	7	6	7	0	7	2	2
c133	c133.a2	c133.a2.a1	Chassy_SC_4552;N1P4R2;CENPK specific;No description in SC288c, annotation and gene name in CENPK: Mal12p (Fragment) -CENPK1137D_3314	15	7	8	13	11	55	13	10	6	19	9	58	11	13	8	11	7	34	18	11	11
d1482	d1482.a1	d1482.a1.a1	Chassy_SC_4548;N1P0I0;Q03691; Protein ROT1 - ROT1	0	0	0	1	1	1	0	0	0	0	0	1	0	0	0	1	1	0	2	0	0
c556	c556.a2	c556.a2.a1	Chassy_SC_4546;N1P4N7;P32907; Ammonia transport outward protein 2 - ATO2	0	3	5	0	5	0	0	0	5	0	6	0	0	1	4	5	5	0	0	1	0
b76	b76.a3	b76.a3.a1	Chassy_SC_4545;N1NVG6;P24784; ATP-dependent RNA helicase DBP1 - DBP1	2	6	10	5	6	2	3	3	8	4	4	4	2	1	9	3	6	3	4	2	2
d1915	d1915.a1	d1915.a1.a1	Chassy_SC_4543;N1P955;P40535; ATF/CREB activator 2 - CST6	0	0	0	0	0	0	0	0	0	0	0	1	0	0	0	0	0	0	0	0	0
d1671	d1671.a1	d1671.a1.a1	Chassy_SC_4542;N1P881;P13185; Serine/threonine protein kinase KIN1 - KIN1	0	0	1	0	0	0	0	0	0	0	0	0	0	0	2	0	1	0	0	0	0
c792	c792.a1	c792.a1.a1	Chassy_SC_4541;N1P5E6;Q04660; Ribosome biogenesis protein ERB1 - ERB1	1	3	3	2	6	1	0	3	4	3	3	3	1	0	2	4	9	1	5	0	0
d1639	d1639.a1	d1639.a1.a1	Chassy_SC_454;N1P5L2;P32767; Importin beta-like protein KAP122 - KAP122	0	0	0	0	1	0	0	0	0	0	0	1	0	0	0	1	1	0	1	0	0
d1516	d1516.a1	d1516.a1.a1	Chassy_SC_4531;N1P974;P37263; UPF0743 protein YCR087C-A - YCR087C-A	0	0	0	0	1	0	0	0	1	0	0	1	0	0	0	1	1	1	1	0	0
d1634	d1634.a1	d1634.a1.a1	Chassy_SC_4528;N1PAW2;P38339; RHO GTPase-activating protein RGD1 - RGD1	0	0	0	1	0	0	0	0	0	1	0	1	0	0	1	0	1	0	0	0	0
d2004	d2004.a1	d2004.a1.a1	Chassy_SC_4524;N1NZ99;P33417; Intrastrand cross-link recognition protein - IXR1	0	0	0	0	0	1	0	0	0	0	0	0	0	0	0	0	0	0	0	0	0
d1419	d1419.a1	d1419.a1.a1	Chassy_SC_4520;N1P0V9;P40335; Carboxypeptidase Y-deficient protein 8 - PEP8	0	1	1	0	0	1	0	0	1	0	0	1	0	0	1	1	2	0	0	0	0
d1760	d1760.a1	d1760.a1.a1	Chassy_SC_4519;N1P158;P36064; COX assembly mitochondrial protein - CMC1	0	0	0	0	1	0	0	0	0	1	1	0	0	0	0	0	0	0	0	0	0
d1871	d1871.a1	d1871.a1.a1	Chassy_SC_4518;N1P3K0;P47131; TMEM14 protein homolog YJR085C - YJR085C	0	0	0	0	2	0	0	0	0	0	0	0	0	0	0	0	0	0	0	0	0
c922	c922.a1	c922.a1.a1	Chassy_SC_4517;N1P5I7;P37303; Low specificity L-threonine aldolase - GLY1	0	2	2	6	4	1	0	3	1	6	3	1	0	0	0	3	3	0	4	0	0
d1943	d1943.a1	d1943.a1.a1	Chassy_SC_4516;N1P9W4;P53264; Cardiolipin-specific deacylase 1, mitochondrial - CLD1	0	0	0	0	0	0	0	0	0	0	0	0	0	0	1	0	0	0	0	0	0
c378	c378.a1	c378.a1.a1	Chassy_SC_4514;N1P2X6;P28777; Chorismate synthase - ARO2	5	12	9	10	11	9	7	13	9	9	9	11	7	4	10	10	14	10	13	3	2
d1309	d1309.a1	d1309.a1.a1	Chassy_SC_4513;N1NZE8;P50946; Putative tyrosine-protein phosphatase OCA1 - OCA1	0	0	3	2	1	2	0	1	1	0	1	0	0	0	1	1	0	0	0	0	0
c766	c766.a1	c766.a1.a1	Chassy_SC_4512;N1NVV6;P35189; Transcription initiation factor TFIID subunit 14 - TAF14	0	4	3	3	3	4	0	3	4	3	5	4	0	0	5	4	5	3	5	0	0
c167	c167.a1	c167.a1.a1	Chassy_SC_4510;N1P3E6;P38934; Nuclear segregation protein BFR1 - BFR1	10	23	22	22	27	21	9	18	22	21	25	25	6	7	15	20	24	16	28	8	8
d1768	d1768.a1	d1768.a1.a1	Chassy_SC_451;N1NYU0;P06174; Uroporphyrinogen-III synthase - HEM4	0	0	0	1	0	0	0	0	0	1	0	0	0	0	0	0	1	0	0	0	0
d1557	d1557.a1	d1557.a1.a1	Chassy_SC_4507;N1NWT9;Q12206; Transcriptional modulator WTM2 - WTM2	0	0	0	0	0	0	0	1	2	0	1	0	0	0	1	0	0	0	1	0	0
c347	c347.a1	c347.a1.a1	Chassy_SC_4504;N1P6V2;P11076; ADP-ribosylation factor 1 - ARF1	4	10	9	12	12	11	5	10	11	12	10	14	6	4	9	9	12	6	8	6	3
d1969	d1969.a1	d1969.a1.a1	Chassy_SC_4503;N1P270;P48363; Prefoldin subunit 3 - PAC10	0	0	0	0	0	0	0	0	0	0	0	0	0	0	0	0	1	0	0	0	0
d1776	d1776.a1	d1776.a1.a1	Chassy_SC_4501;N1NVT0;P32913; Vacuolar protein sorting-associated protein 17 - VPS17	0	0	0	0	0	0	0	0	0	0	0	0	0	0	0	0	1	0	1	0	0
d1579	d1579.a1	d1579.a1.a1	Chassy_SC_45;N1P4B8;P40459; Pantoate--beta-alanine ligase - PAN6	0	0	1	0	0	2	0	0	0	0	0	1	0	0	0	0	1	0	1	0	0
c353	c353.a1	c353.a1.a1	Chassy_SC_4496;N1P3F2;(P0CX31-P0CX32);40S ribosomal protein S24- NA	6	13	15	9	15	10	7	10	9	7	15	9	5	6	11	12	11	8	11	7	9
c472	c472.a1	c472.a1.a1	Chassy_SC_4486;N1P5V4;Q05016; NADP-dependent 3-hydroxy acid dehydrogenase - YMR226C	4	7	7	13	10	8	2	9	4	9	11	7	4	1	7	9	14	3	15	0	1
c117	c117.a1	c117.a1.a1	Chassy_SC_4482;N1PAG0;P49367; Homoaconitase, mitochondrial - LYS4	17	31	28	30	25	22	15	25	29	26	24	22	18	16	19	24	36	17	31	13	15
c959	c959.a1	c959.a1.a1	Chassy_SC_4481;N1P774;Q01477; Ubiquitin carboxyl-terminal hydrolase 3 - UBP3	0	1	4	4	3	2	1	1	2	3	1	4	0	0	1	0	4	2	3	0	0
c448	c448.a1	c448.a1.a1	Chassy_SC_4480;N1P3B9;P20459; Eukaryotic translation initiation factor 2 subunit alpha - SUI2	3	8	9	9	11	8	3	8	7	11	7	9	4	4	8	8	12	5	10	5	4
d1909	d1909.a1	d1909.a1.a1	Chassy_SC_4479;N1P0S3;P40457;|reversed Protein MLP2 - MLP2	0	0	0	0	1	0	0	0	0	0	0	0	0	0	0	0	0	0	0	0	0
c350	c350.a1	c350.a1.a1	Chassy_SC_4476;N1P3W1;Q08822; Probable electron transfer flavoprotein-ubiquinone oxidoreductase, mitochondrial - CIR2	7	16	11	10	18	8	7	15	9	9	13	8	6	4	12	11	16	6	11	5	4
d1442	d1442.a1	d1442.a1.a1	Chassy_SC_4475;N1NWT5;Q08409; ATP-dependent permease AUS1 - AUS1	0	0	0	0	0	3	0	0	0	0	0	5	0	0	0	0	0	1	0	0	0
d1750	d1750.a1	d1750.a1.a1	Chassy_SC_4473;N1NVP7;P48525; Glutamate--tRNA ligase, mitochondrial - MSE1	0	0	1	0	0	0	0	0	0	0	0	0	0	0	1	0	1	0	0	0	0
d1745	d1745.a1	d1745.a1.a1	Chassy_SC_4468;N1NWF4;P38903; Serine/threonine-protein phosphatase 2A 56 kDa regulatory subunit delta isoform - RTS1	0	0	2	0	0	0	0	0	0	0	0	0	0	0	1	0	0	0	0	0	0
c871	c871.a1	c871.a1.a1	Chassy_SC_4466;N1P1B3;P47044; LOG family protein YJL055W - YJL055W	1	3	3	3	3	2	1	2	4	0	3	3	0	0	3	4	4	1	4	0	0
c918	c918.a1	c918.a1.a1	Chassy_SC_4462;N1PAH8;P38986; L-asparaginase 1 - ASP1	2	2	1	2	3	4	1	3	2	3	1	4	0	0	1	2	3	2	3	0	1
b74	b74.a1	b74.a1.a1	Chassy_SC_4460;N1NYR2;P04802; Aspartate--tRNA ligase, cytoplasmic - DPS1	22	29	32	37	38	29	27	32	34	34	37	33	22	17	32	37	40	21	41	19	18
d1928	d1928.a1	d1928.a1.a1	Chassy_SC_446;N1P0X3;P36135; Probable secreted beta-glucosidase UTH1 - UTH1	0	0	0	0	0	0	0	0	0	0	0	1	0	0	0	0	0	0	0	0	0
b68	b68.a1	b68.a1.a1	Chassy_SC_4459;N1PA31;P39692; Sulfite reductase [NADPH] flavoprotein component - MET10	23	32	28	45	41	42	20	40	28	41	38	42	14	16	26	40	45	27	43	15	16
c806	c806.a1	c806.a1.a1	Chassy_SC_4455;N1P054;P36037; Protein DOA1 - DOA1	0	4	4	3	2	6	0	5	5	1	2	5	0	0	4	4	2	3	2	0	0
d1471	d1471.a1	d1471.a1.a1	Chassy_SC_4452;N1P629;P42935; Elongator complex protein 2 - ELP2	0	0	2	0	0	2	0	0	0	3	0	0	0	0	0	0	1	0	0	0	0
c631	c631.a1	c631.a1.a1	Chassy_SC_4450;N1P7U0;P39517; ATP-dependent RNA helicase DHH1 - DHH1	4	3	7	6	5	6	2	5	4	4	6	5	1	2	4	6	6	2	7	1	1
d1055	d1055.a1	d1055.a1.a1	Chassy_SC_4448;N1NW87;P46669; DNA-directed RNA polymerase I subunit RPA43 - RPA43	0	2	1	2	3	1	0	1	0	4	1	2	0	0	1	2	4	1	1	0	0
d1784	d1784.a1	d1784.a1.a1	Chassy_SC_4447;N1P5E0;P48569; Uncharacterized protein YDL183C - YDL183C	0	0	1	0	0	0	0	0	1	0	0	0	0	0	0	0	0	0	0	0	0
c222	c222.a1	c222.a1.a1	Chassy_SC_4446;N1P7W2;Q07653; Protein HBT1 - HBT1	15	17	28	22	26	0	14	21	23	17	24	0	8	10	25	19	24	0	12	7	8
c297	c297.a1	c297.a1.a1	Chassy_SC_4445;N1NXJ3;P26785; 60S ribosomal protein L16-B - RPL16B	5	9	12	6	14	5	4	10	9	10	11	6	4	5	8	9	10	5	6	6	5
d1060	d1060.a1	d1060.a1.a1	Chassy_SC_4444;N1P826;Q99288; Broad-range acid phosphatase DET1 - DET1	0	2	3	3	1	0	0	2	2	2	2	0	0	0	2	1	3	1	2	0	0
c520	c520.a1	c520.a1.a1	Chassy_SC_4442;N1P678;P32379; Proteasome subunit alpha type-5 - PUP2	1	9	6	9	9	5	1	7	7	9	9	9	1	1	3	8	10	5	12	1	2
d1078	d1078.a1	d1078.a1.a1	Chassy_SC_4441;N1PA24;P43585; Vacuolar transporter chaperone 2 - VTC2	0	2	2	2	0	2	0	1	1	1	3	3	0	0	2	1	1	1	2	0	0
d1733	d1733.a1	d1733.a1.a1	Chassy_SC_444;N1PA99;Q07457; E3 ubiquitin-protein ligase BRE1 - BRE1	0	0	1	1	0	0	0	0	0	1	0	0	0	0	0	0	0	0	0	0	0
c930	c930.a1	c930.a1.a1	Chassy_SC_4436;N1P4B2;P40580; Benzil reductase ((S)-benzoin forming) IRC24 - IRC24	0	2	4	2	4	2	0	3	2	1	4	4	0	0	2	3	3	0	2	0	0
c199	c199.a2	c199.a2.a1	Chassy_SC_4435;N1P1Q5;P39002; Long-chain-fatty-acid--CoA ligase 3 - FAA3	2	1	1	0	1	1	1	0	1	1	0	1	1	1	1	0	1	1	1	1	0
d1019	d1019.a1	d1019.a1.a1	Chassy_SC_4432;N1P6Z3;P40043; Respiratory growth induced protein 1 - RGI1	1	1	3	1	2	0	1	2	3	1	1	2	1	1	2	3	2	1	0	1	0
d1872	d1872.a1	d1872.a1.a1	Chassy_SC_4430;N1P8F1;P38163; Lethal(2) giant larvae protein homolog SRO77 - SRO77	0	0	0	0	0	1	0	0	0	0	0	1	0	0	0	0	0	0	0	0	0
c891	c891.a1	c891.a1.a1	Chassy_SC_4429;N1P4L9;P38809; Uncharacterized protein YHR097C - YHR097C	1	3	7	1	3	0	0	2	5	1	3	0	0	0	6	3	7	0	0	0	0
d1260	d1260.a1	d1260.a1.a1	Chassy_SC_4428;N1NX65;P32266; Dynamin-like GTPase MGM1, mitochondrial - MGM1	0	1	2	4	1	0	0	0	0	1	1	1	0	0	1	0	0	0	3	0	0
c326	c326.a1	c326.a1.a1	Chassy_SC_4425;N1NXU3;P32497; Eukaryotic translation initiation factor 3 subunit C - NIP1	6	18	11	14	10	11	9	9	10	16	11	15	6	6	10	14	14	9	18	3	5
d1079	d1079.a1	d1079.a1.a1	Chassy_SC_4424;N1P076;Q02630; Nucleoporin NUP116/NSP116 - NUP116	0	1	3	1	1	1	1	0	2	1	3	3	0	0	1	0	5	0	1	0	0
d2090	d2090.a1	d2090.a1.a1	Chassy_SC_4422;N1PAS8;P38262; SIR4-interacting protein SIF2 - SIF2	0	0	0	0	0	0	0	0	0	0	0	0	0	0	0	0	1	0	0	0	0
d1583	d1583.a1	d1583.a1.a1	Chassy_SC_4418;N1P295;Q06839; PX domain-containing protein YPR097W - YPR097W	0	0	2	0	0	0	0	1	0	1	0	1	0	0	0	0	0	0	1	0	0
c652	c652.a1	c652.a1.a1	Chassy_SC_4411;N1PAM8;Q12434; Rho GDP-dissociation inhibitor - RDI1	0	6	6	5	6	3	1	4	9	5	6	4	2	0	5	6	5	2	6	0	1
d1297	d1297.a1	d1297.a1.a1	Chassy_SC_441;N1P910;P47001; Cell wall mannoprotein CIS3 - CIS3	0	0	1	1	2	1	0	1	1	1	1	1	0	0	1	0	1	0	1	0	0
c993	c993.a1	c993.a1.a1	Chassy_SC_4407;N1NVR4;P50861; 6,7-dimethyl-8-ribityllumazine synthase - RIB4	1	2	1	3	2	1	1	2	2	4	2	0	1	0	0	3	2	0	4	0	1
d1794	d1794.a1	d1794.a1.a1	Chassy_SC_4406;N1P4Z1;P34077; Nucleoporin NIC96 - NIC96	0	0	0	0	0	0	0	0	0	0	0	0	0	0	0	1	1	0	0	0	0
d1542	d1542.a1	d1542.a1.a1	Chassy_SC_4401;N1P0W7;P40484; DBF2 kinase activator protein MOB1 - MOB1	0	1	1	1	0	0	0	0	1	0	0	0	0	0	0	1	1	0	1	0	0
c237	c237.a2	c237.a2.a1	Chassy_SC_4400;N1NWQ1;Q12123; Inactive diphosphatase DCS2 - DCS2	4	8	11	8	18	5	4	10	14	9	12	3	2	3	11	15	6	4	7	3	3
b79	b79.a1	b79.a1.a1	Chassy_SC_4398;N1P540;P39954; Adenosylhomocysteinase - SAH1	23	31	24	33	29	34	25	32	26	29	28	37	25	23	27	30	39	31	31	25	24
c110	c110.a2	c110.a2.a1	Chassy_SC_4397;N1P1L5;P37898; Alanine/arginine aminopeptidase - AAP1	6	17	17	8	11	8	3	11	12	7	5	12	2	0	13	16	15	4	7	1	2
b43	b43.a1	b43.a1.a1	Chassy_SC_4394;N1NZZ7;P06106; Homocysteine/cysteine synthase - MET17	32	47	43	47	53	52	26	52	42	51	47	46	29	28	34	50	54	44	51	26	27
a9	a9.a1	a9.a1.a1	Chassy_SC_4389;N1PA49;P05694; 5-methyltetrahydropteroyltriglutamate--homocysteine methyltransferase - MET6	75	104	76	88	112	94	67	106	84	84	105	119	69	65	71	99	114	91	90	61	57
c597	c597.a1	c597.a1.a1	Chassy_SC_4388;N1NVH4;P05626; ATP synthase subunit 4, mitochondrial - ATP4	2	5	4	12	8	6	1	6	6	6	5	5	1	0	5	7	4	5	6	1	1
d1153	d1153.a1	d1153.a1.a1	Chassy_SC_4387;N1PAJ5;P32387; 54S ribosomal protein L41, mitochondrial - MRP20	0	1	1	1	2	2	0	1	1	1	1	2	0	0	1	1	1	2	2	0	0
d1674	d1674.a1	d1674.a1.a1	Chassy_SC_4386;N1P8U4;P38342; 3-ketodihydrosphingosine reductase TSC10 - TSC10	0	1	0	0	0	0	0	0	0	0	0	1	0	0	0	0	1	1	0	0	0
b18	b18.a2	b18.a2.a1	Chassy_SC_4384;N1P3V3;P52489; Pyruvate kinase 2 - PYK2	2	3	6	3	6	7	4	5	4	5	6	7	2	3	3	2	5	6	5	1	2
c860	c860.a1	c860.a1.a1	Chassy_SC_4382;N1NZF8;P19073; Cell division control protein 42 - CDC42	1	3	3	5	2	2	2	1	1	3	2	2	1	2	3	2	3	2	3	1	1
c164	c164.a1	c164.a1.a1	Chassy_SC_4380;N1NZX6;P07991; Ornithine aminotransferase - CAR2	14	28	27	14	26	8	12	25	30	11	26	8	11	15	26	27	29	6	16	10	13
d1481	d1481.a1	d1481.a1.a1	Chassy_SC_4377;N1P2N6;P38797; Protein phosphatase 2C homolog 7, mitochondrial - PTC7	0	1	1	0	1	0	0	2	1	0	1	0	0	0	0	0	1	0	0	0	0
c670	c670.a1	c670.a1.a1	Chassy_SC_4373;N1NYG1;Q01662; Methionine aminopeptidase 1 - MAP1	3	5	4	4	6	7	2	4	2	3	4	6	1	2	3	7	3	5	5	1	1
d1139	d1139.a1	d1139.a1.a1	Chassy_SC_437;N1P064;Q06053; tRNA-dihydrouridine(47) synthase [NAD(P)(+)] - DUS3	0	1	1	1	2	1	0	1	1	2	2	1	0	0	1	2	2	0	3	0	0
b34	b34.a2	b34.a2.a1	Chassy_SC_4368;N1NYC1;P10659; S-adenosylmethionine synthase 1 - SAM1	22	31	23	34	32	34	21	31	25	26	33	34	21	20	28	29	31	31	29	24	22
c612	c612.a1	c612.a1.a1	Chassy_SC_4366;N1P685;Q12447; Polyamine N-acetyltransferase 1 - PAA1	1	6	6	6	7	6	0	6	5	6	7	6	0	0	6	6	6	4	6	1	0
c411	c411.a1	c411.a1.a1	Chassy_SC_4359;N1P1A9;P47039; Probable kynurenine--oxoglutarate transaminase BNA3 - BNA3	5	9	9	14	12	8	5	12	10	11	11	8	3	3	12	11	8	4	10	3	2
d1053	d1053.a2	d1053.a2.a1	Chassy_SC_4356;N1PA83;P39925; Mitochondrial respiratory chain complexes assembly protein AFG3 - AFG3	0	1	1	2	3	2	0	0	1	1	1	1	0	0	0	1	0	1	1	0	0
c395	c395.a1	c395.a1.a1	Chassy_SC_4353;N1P086;P36010; Nucleoside diphosphate kinase - YNK1	5	9	9	11	13	8	4	10	8	14	11	7	5	6	8	10	8	7	15	5	4
d2053	d2053.a1	d2053.a1.a1	Chassy_SC_4352;N1P957;P40318; ERAD-associated E3 ubiquitin-protein ligase DOA10 - SSM4	0	0	0	0	0	0	0	0	0	0	0	0	0	0	0	0	0	0	1	0	0
d1530	d1530.a1	d1530.a1.a1	Chassy_SC_4351;N1P2L0;P50086; Probable 26S proteasome regulatory subunit p28 - NAS6	0	0	0	1	2	0	0	0	1	0	0	0	0	0	0	1	2	0	0	0	0
c798	c798.a1	c798.a1.a1	Chassy_SC_4349;N1P2E7;P45978; Protein SCD6 - SCD6	0	4	6	4	4	1	0	4	4	3	4	3	0	0	4	4	4	0	4	0	0
d1651	d1651.a1	d1651.a1.a1	Chassy_SC_4345;N1P0I5;CENPK specific;No description in SC288c, annotation and gene name in CENPK: Cytochrome c heme lyase -CENPK1137D_916	0	1	0	0	0	0	0	1	0	0	0	1	0	0	1	0	0	0	0	0	0
c346	c346.a1	c346.a1.a1	Chassy_SC_4344;N1NYB9;P33322; H/ACA ribonucleoprotein complex subunit 4 - CBF5	4	14	11	13	10	11	7	13	13	15	13	14	5	4	11	12	11	8	13	2	4
c188	c188.a1	c188.a1.a1	Chassy_SC_4343;N1NY02;P34760; Peroxiredoxin TSA1 - TSA1	9	21	17	20	21	17	10	24	19	14	19	14	11	10	17	22	21	11	19	10	11
d1339	d1339.a1	d1339.a1.a1	Chassy_SC_4342;N1P899;P38281; Actin patches distal protein 1 - APD1	0	1	1	0	1	2	0	0	1	0	1	3	0	0	1	1	0	0	0	0	0
d1955	d1955.a1	d1955.a1.a1	Chassy_SC_4338;N1NZ62;Q08023; Protein FMP25, mitochondrial - FMP25	0	0	0	0	0	0	0	0	0	0	0	0	0	0	0	0	1	0	0	0	0
c820	c820.a1	c820.a1.a1	Chassy_SC_4331;N1NYT5;P34160; Nuclear cap-binding protein complex subunit 1 - STO1	2	4	5	3	1	3	0	1	5	3	3	5	0	0	5	4	3	0	3	0	1
d1912	d1912.a1	d1912.a1.a1	Chassy_SC_433;N1P8F7;P09880; tRNA ligase - TRL1	0	0	1	0	0	0	0	0	0	0	0	0	0	0	0	0	0	0	0	0	0
c916	c916.a1	c916.a1.a1	Chassy_SC_4327;N1P1R5;P32915; Protein transport protein SEC61 - SEC61	1	3	2	3	2	2	1	2	2	2	2	2	2	1	2	2	3	2	2	1	1
b14	b14.a1	b14.a1.a1	Chassy_SC_4324;N1P4Q3;Q00955; Acetyl-CoA carboxylase - ACC1	64	81	84	92	90	86	63	89	93	92	90	88	65	63	83	90	100	62	103	50	65
d1665	d1665.a1	d1665.a1.a1	Chassy_SC_4323;N1P3B1;Q08548; Lysophospholipid acyltransferase - ALE1	0	0	0	0	0	0	0	0	1	0	0	2	0	0	1	0	0	0	0	0	0
c566	c566.a1	c566.a1.a1	Chassy_SC_4318;N1P5H4;Q04178; Hypoxanthine-guanine phosphoribosyltransferase - HPT1	0	6	6	6	9	5	0	6	6	5	4	7	1	0	6	8	6	5	4	0	0
d1713	d1713.a1	d1713.a1.a1	Chassy_SC_4315;N1NWM9;Q08960; S-adenosyl-L-methionine-dependent tRNA 4-demethylwyosine synthase - TYW1	0	0	0	1	0	1	0	0	0	0	0	0	0	0	0	0	1	0	0	0	0
c967	c967.a1	c967.a1.a1	Chassy_SC_4312;N1NZW0;Q06697; Cell division control protein 73 - CDC73	0	2	4	1	5	1	0	4	2	4	3	1	0	0	2	0	3	0	3	0	0
c606	c606.a1	c606.a1.a1	Chassy_SC_4311;N1NVX7;Q12029; Probable mitochondrial transport protein FSF1 - FSF1	3	4	6	7	8	4	4	5	5	7	6	2	2	3	5	4	5	3	7	0	2
c495	c495.a1	c495.a1.a1	Chassy_SC_431;N1NVL0;Q06103; 26S proteasome regulatory subunit RPN7 - RPN7	4	8	10	6	6	5	5	9	8	9	7	4	3	3	9	8	7	4	10	5	4
d1833	d1833.a1	d1833.a1.a1	Chassy_SC_4306;N1PAQ7;P38162; Mitochondrial intermembrane space cysteine motif-containing protein MIX23 - MIX23	0	0	0	1	0	0	0	0	0	0	0	0	0	0	1	0	0	0	0	0	0
d1891	d1891.a1	d1891.a1.a1	Chassy_SC_4305;N1P9S6;P06182; Cytochrome c heme lyase - CYC3	0	0	0	0	0	0	0	0	1	0	0	0	0	0	0	0	0	0	0	0	0
c480	c480.a1	c480.a1.a1	Chassy_SC_4304;N1P890;P38075; Pyridoxamine 5'-phosphate oxidase - PDX3	3	7	9	9	12	6	4	7	8	8	10	9	0	1	9	10	9	6	11	2	1
c536	c536.a1	c536.a1.a1	Chassy_SC_4302;N1NX96;P32573; Peroxisomal 2,4-dienoyl-CoA reductase SPS19 - SPS19	3	7	11	10	8	0	2	9	11	7	9	1	3	2	8	7	8	0	9	1	1
d1232	d1232.a1	d1232.a1.a1	Chassy_SC_430;N1P0H8;P28319; Cell wall protein CWP1 - CWP1	0	0	0	7	0	0	0	0	0	5	0	0	0	0	0	0	0	0	4	0	0
d1474	d1474.a1	d1474.a1.a1	Chassy_SC_43;N1P3Y2;P42936; Putative elongation factor 1 gamma homolog - YGR201C	0	0	1	0	1	0	0	1	0	0	1	0	0	0	0	2	2	0	0	0	0
d1552	d1552.a1	d1552.a1.a1	Chassy_SC_4294;N1NZV3;P40368; Nucleoporin NUP82 - NUP82	0	0	1	0	0	0	0	0	2	0	0	0	0	0	0	1	1	0	1	0	0
c148	c148.a3	c148.a3.a1	Chassy_SC_429;N1P5B7;P23585; High-affinity glucose transporter HXT2 - HXT2	3	5	4	4	4	2	2	3	3	3	2	3	4	3	3	4	4	0	6	4	5
c332	c332.a1	c332.a1.a1	Chassy_SC_4289;N1P382;P43593; Ubiquitin carboxyl-terminal hydrolase 6 - UBP6	6	13	13	14	12	14	4	11	13	17	13	10	4	5	12	10	14	10	18	3	6
d1993	d1993.a1	d1993.a1.a1	Chassy_SC_4287;N1NWN7;Q08273; RING-box protein HRT1 - HRT1	0	0	0	0	0	0	0	0	0	0	0	0	0	0	0	0	0	0	1	0	0
c633	c633.a1	c633.a1.a1	Chassy_SC_4285;N1PAP3;Q96VH4; Putative nitroreductase HBN1 - HBN1	2	5	3	12	5	0	1	3	2	13	4	1	1	1	4	3	5	0	20	1	1
c758	c758.a1	c758.a1.a1	Chassy_SC_4284;N1PA74;P39990; 13 kDa ribonucleoprotein-associated protein - SNU13	1	4	2	6	3	3	1	4	5	4	5	5	0	1	1	3	4	2	4	0	1
c625	c625.a1	c625.a1.a1	Chassy_SC_4282;N1P163;P12688; Serine/threonine-protein kinase YPK1 - YPK1	0	6	5	9	4	7	0	3	7	3	3	6	0	0	4	5	7	1	6	0	1
d1146	d1146.a1	d1146.a1.a1	Chassy_SC_4281;N1NYC0;Q04305; U3 small nucleolar RNA-associated protein 15 - UTP15	0	2	2	2	1	2	0	1	1	1	2	2	0	0	0	1	1	0	3	0	0
d2094	d2094.a1	d2094.a1.a1	Chassy_SC_428;N1P943;P42945; U3 small nucleolar RNA-associated protein 10 - UTP10	0	0	0	0	0	0	0	0	0	0	0	0	0	0	0	0	1	0	0	0	0
d1120	d1120.a1	d1120.a1.a1	Chassy_SC_4278;N1P6J8;P36521; 54S ribosomal protein L11, mitochondrial - MRPL11	0	1	1	1	4	1	0	0	2	1	2	2	0	0	1	1	2	1	2	0	0
d2034	d2034.a1	d2034.a1.a1	Chassy_SC_4274;N1P0C0;P36014; Glutathione peroxidase-like peroxiredoxin 1 - GPX1	0	0	0	0	0	0	0	0	0	0	1	0	0	0	0	0	0	0	0	0	0
d1118	d1118.a1	d1118.a1.a1	Chassy_SC_4269;N1NXW5;P40312; Cytochrome b5 - CYB5	0	2	0	1	2	1	1	1	2	1	1	1	1	2	0	3	1	0	1	1	0
c573	c573.a1	c573.a1.a1	Chassy_SC_4268;N1P3B8;P32608; Retrograde regulation protein 2 - RTG2	1	6	7	8	3	5	3	5	9	7	6	6	1	2	7	8	9	4	8	0	0
d1164	d1164.a1	d1164.a1.a1	Chassy_SC_4266;N1P3S7;P46985; Probable alpha-1,6-mannosyltransferase MNN11 - MNN11	0	2	0	2	1	2	0	2	1	1	2	4	0	0	0	1	1	0	1	0	0
d1813	d1813.a1	d1813.a1.a1	Chassy_SC_4264;N1PAR9;P38080; Serine/threonine-protein kinase AKL1 - AKL1	0	0	0	0	0	0	0	0	0	0	0	0	0	0	1	0	1	0	0	0	0
d1929	d1929.a1	d1929.a1.a1	Chassy_SC_4262;N1P024;Q00582; GTP-binding protein GTR1 - GTR1	0	0	0	0	0	0	0	0	1	0	0	0	0	0	0	0	0	0	0	0	0
d1168	d1168.a1	d1168.a1.a1	Chassy_SC_4261;N1P101;P40517; Ran-specific GTPase-activating protein 2 - YRB2	0	0	3	0	0	0	0	2	3	0	2	1	0	0	3	1	4	0	0	0	0
d1287	d1287.a1	d1287.a1.a1	Chassy_SC_4260;N1P9D7;P38604; Lanosterol synthase - ERG7	0	2	1	0	0	3	0	1	1	1	0	1	0	0	1	0	2	1	0	0	0
c715	c715.a1	c715.a1.a1	Chassy_SC_4257;N1PAY7;P39729; Ribosome-interacting GTPase 1 - RBG1	0	4	4	8	5	3	1	5	4	6	5	3	0	0	4	3	6	2	6	0	0
c444	c444.a1	c444.a1.a1	Chassy_SC_4254;N1P2G9;P06780; GTP-binding protein RHO1 - RHO1	4	7	10	4	11	8	2	8	13	7	11	6	4	4	9	12	12	8	8	3	3
b94	b94.a1	b94.a1.a1	Chassy_SC_4251;N1NZP2;Q00711; Succinate dehydrogenase [ubiquinone] flavoprotein subunit, mitochondrial - SDH1	19	24	27	34	28	20	17	30	34	31	31	23	14	16	31	26	33	22	36	15	16
d1824	d1824.a1	d1824.a1.a1	Chassy_SC_4250;N1NYU1;P40207; Uncharacterized protein YMR134W - YMR134W	0	0	0	0	0	0	0	1	0	0	0	1	0	0	0	0	0	0	0	0	0
d2060	d2060.a1	d2060.a1.a1	Chassy_SC_425;N1P7K1;Q04344; Hit family protein 1 - HNT1	0	0	0	0	0	0	0	0	0	0	0	0	0	0	0	0	1	0	0	0	0
d1566	d1566.a1	d1566.a1.a1	Chassy_SC_4246;N1P6N0;P39109; Metal resistance protein YCF1 - YCF1	0	0	0	2	0	0	0	0	0	2	0	0	0	0	0	1	0	0	1	0	0
d1685	d1685.a1	d1685.a1.a1	Chassy_SC_4241;N1P2F2;P32857; Membrane protein PTM1 - PTM1	0	0	0	1	0	0	0	0	0	1	0	0	0	0	1	0	0	0	1	0	0
d1477	d1477.a1	d1477.a1.a1	Chassy_SC_4239;N1P4C0;P53920; Pro-apoptotic serine protease NMA111 - NMA111	0	1	0	1	0	0	0	0	0	2	0	0	0	0	0	0	2	1	1	0	0
b80	b80.a2	b80.a2.a1	Chassy_SC_4238;N1NW49;P29547; Elongation factor 1-gamma 1 - CAM1	12	14	19	22	17	14	10	14	19	22	16	18	10	11	17	14	23	11	17	10	11
d1087	d1087.a1	d1087.a1.a1	Chassy_SC_4235;N1NVV7;Q12044; Regulator of calcineurin 2 - RCN2	0	1	5	0	2	0	0	0	4	0	6	0	0	0	3	1	2	0	0	0	0
d1920	d1920.a1	d1920.a1.a1	Chassy_SC_4230;N1P6W3;Q06668; Methyltransferase OMS1, mitochondrial - OMS1	0	0	0	0	0	0	0	0	1	0	0	0	0	0	0	0	0	0	0	0	0
c624	c624.a1	c624.a1.a1	Chassy_SC_423;N1NZH1;P21965; Protein kinase MCK1 - MCK1	3	5	8	5	7	4	2	4	8	3	7	5	2	2	5	5	4	3	3	2	2
c718	c718.a1	c718.a1.a1	Chassy_SC_4229;N1PA22;P22943; 12 kDa heat shock protein - HSP12	5	6	5	0	5	0	5	3	4	0	5	0	3	5	4	4	5	0	0	3	5
c220	c220.a1	c220.a1.a1	Chassy_SC_4227;N1NZP4;Q05911; Adenylosuccinate lyase - ADE13	10	13	14	17	20	22	11	18	15	19	15	24	13	11	14	17	19	14	16	11	9
d1837	d1837.a1	d1837.a1.a1	Chassy_SC_4226;N1NX85;Q12296; Protein MAM3 - MAM3	0	0	1	0	0	0	0	0	0	0	0	0	0	0	1	0	0	0	0	0	0
d1165	d1165.a1	d1165.a1.a1	Chassy_SC_4225;N1P3P4;P53008; Mannosyl-oligosaccharide glucosidase - CWH41	0	1	2	0	1	3	0	1	1	1	2	3	0	0	1	1	2	1	0	0	0
b76	b76.a2	b76.a2.a1	Chassy_SC_4224;N1P1V8;P20447; ATP-dependent RNA helicase DBP3 - DBP3	0	6	5	8	9	9	1	6	4	7	8	11	0	1	4	8	9	8	5	0	0
d1515	d1515.a1	d1515.a1.a1	Chassy_SC_4221;N1P102;P32769; Elongation factor 1 alpha-like protein - HBS1	0	0	1	1	0	0	0	0	0	2	0	0	0	0	0	0	0	1	2	0	0
d1863	d1863.a1	d1863.a1.a1	Chassy_SC_4212;N1NWD3;Q92325; Cullin-associated NEDD8-dissociated protein 1 homolog - LAG2	0	0	0	0	0	0	0	0	1	0	0	0	0	0	1	0	0	0	0	0	0
c397	c397.a1	c397.a1.a1	Chassy_SC_4202;N1P9X7;P53297; PAB1-binding protein 1 - PBP1	5	7	13	10	13	8	4	11	10	10	12	12	1	3	11	13	12	7	11	2	1
d2013	d2013.a1	d2013.a1.a1	Chassy_SC_4200;N1NZQ7;P36069; Probable phosphoglycerate mutase PMU1 - PMU1	0	0	0	0	0	0	0	0	0	1	0	0	0	0	0	0	0	0	0	0	0
c623	c623.a2	c623.a2.a1	Chassy_SC_42;N1P0R3;P36006; Myosin-3 - MYO3	1	1	4	3	2	2	1	0	4	2	1	1	0	0	3	1	4	0	2	0	0
d1711	d1711.a1	d1711.a1.a1	Chassy_SC_4194;N1NWX7;Q08746; Regulator of ribosome biosynthesis - RRS1	0	0	1	0	0	1	0	0	0	0	1	0	0	0	0	0	0	0	0	0	0
c588	c588.a1	c588.a1.a1	Chassy_SC_4192;N1P5Y3;P00128; Cytochrome b-c1 complex subunit 7 - QCR7	2	6	4	7	12	3	2	6	4	8	7	0	2	4	1	8	10	0	11	1	1
c491	c491.a1	c491.a1.a1	Chassy_SC_419;N1P956;Q12250; 26S proteasome regulatory subunit RPN5 - RPN5	5	6	9	7	8	6	5	7	7	8	5	7	5	5	9	9	10	3	9	2	3
d1013	d1013.a1	d1013.a1.a1	Chassy_SC_4188;N1PAT0;Q01976; ADP-ribose pyrophosphatase - YSA1	0	2	3	2	2	1	0	2	2	2	2	2	0	0	2	2	3	1	2	0	0
d1732	d1732.a1	d1732.a1.a1	Chassy_SC_4185;N1P0F9;Q02206; Chromatin structure-remodeling complex subunit RSC4 - RSC4	0	0	1	0	0	2	0	0	0	0	0	0	0	0	0	0	0	0	0	0	0
d1351	d1351.a1	d1351.a1.a1	Chassy_SC_4184;N1P2R1;Q08223; Altered inheritance of mitochondria protein 39, mitochondrial - AIM39	0	0	1	1	1	3	0	0	0	0	0	2	0	0	1	0	0	1	1	0	0
c726	c726.a1	c726.a1.a1	Chassy_SC_4182;N1NY21;P53615; Carbonic anhydrase - NCE103	2	6	3	0	8	2	2	5	4	0	6	2	2	2	4	8	5	0	2	1	1
c183	c183.a1	c183.a1.a1	Chassy_SC_4181;N1P605;P53622; Coatomer subunit alpha - COP1	9	19	22	23	22	23	11	18	22	22	20	19	7	6	20	19	26	14	22	9	5
b86	b86.a1	b86.a1.a1	Chassy_SC_418;N1PAU8;P12709; Glucose-6-phosphate isomerase - PGI1	20	21	26	34	30	44	17	21	27	32	24	55	19	18	26	25	31	31	42	16	17
d2044	d2044.a1	d2044.a1.a1	Chassy_SC_4179;N1P2I7;P40505; Transcriptional regulatory protein SDS3 - SDS3	0	0	1	0	0	0	0	0	0	0	0	0	0	0	0	0	0	0	0	0	0
c564	c564.a1	c564.a1.a1	Chassy_SC_4177;N1NWY0;(P0CX49-P0CX50);60S ribosomal protein L18- NA	4	6	4	6	8	4	3	5	5	5	6	6	5	4	4	4	6	3	6	8	6
c240	c240.a1	c240.a1.a1	Chassy_SC_4176;N1PAK8;P0C2H6; 60S ribosomal protein L27-A - RPL27A	8	18	17	15	20	13	9	19	15	15	18	15	8	8	16	16	21	11	16	8	9
c176	c176.a1	c176.a1.a1	Chassy_SC_4175;N1NZE5;(P0CX56-P0CX55);40S ribosomal protein S18- NA	14	14	20	18	25	16	15	19	14	21	21	16	12	17	14	19	20	14	23	15	17
c797	c797.a1	c797.a1.a1	Chassy_SC_4174;N1PAQ9;P02309; Histone H4 - HHF1	0	1	4	4	4	4	0	5	3	3	4	3	0	1	3	3	4	1	3	1	2
c365	c365.a1	c365.a1.a1	Chassy_SC_4173;N1P771;(P0CX53-P0CX54);60S ribosomal protein L12-A- NA	7	12	9	9	11	10	6	11	9	13	14	10	10	5	8	12	9	10	10	6	5
c181	c181.a1	c181.a1.a1	Chassy_SC_4172;N1P6U2;(P0CX46-P0CX45);60S ribosomal protein L23- NA	12	21	19	20	31	19	9	19	19	20	24	20	10	8	17	19	25	12	20	7	7
c419	c419.a1	c419.a1.a1	Chassy_SC_4171;N1P744;(P0CX42-P0CX41);60S ribosomal protein L23- NA	1	14	12	12	16	11	1	8	9	11	15	9	1	2	8	9	9	4	15	1	0
c909	c909.a1	c909.a1.a1	Chassy_SC_4170;N1P868;P61830; Histone H3 - HHT1	2	4	2	2	2	1	2	2	2	1	3	2	2	1	2	2	1	2	2	2	1
c794	c794.a1	c794.a1.a1	Chassy_SC_417;N1P6W6;Q04935; Cytochrome c oxidase protein 20, mitochondrial - COX20	1	6	4	3	2	4	1	2	3	4	2	2	0	0	4	4	4	3	2	1	1
c137	c137.a1	c137.a1.a1	Chassy_SC_4168;N1P2T8;(P0CH09-P0CH08);Ubiquitin-60S ribosomal protein L40- NA	24	8	14	9	11	7	21	9	10	5	8	7	29	26	10	8	13	7	6	21	24
d1792	d1792.a1	d1792.a1.a1	Chassy_SC_4167;N1P7X0;P38156; Maltose permease MAL31 - MAL31	0	0	0	0	0	1	0	0	0	0	0	1	0	0	0	0	0	0	0	0	0
c496	c496.a1	c496.a1.a1	Chassy_SC_4166;N1P5Z6;(P0CX52-P0CX51);40S ribosomal protein S16- NA	4	8	9	7	11	7	5	6	4	7	10	6	5	3	4	7	9	4	10	4	4
c370	c370.a1	c370.a1.a1	Chassy_SC_4165;N1P5W3;(P0CX29-P0CX30);40S ribosomal protein S23- NA	3	13	8	12	11	12	3	11	9	13	11	14	6	4	9	12	13	10	12	3	3
d1897	d1897.a1	d1897.a1.a1	Chassy_SC_4163;N1P0N3;P40545; 1-(5-phosphoribosyl)-5-[(5-phosphoribosylamino)methylideneamino] imidazole-4-carboxamide isomerase - HIS6	0	0	0	1	0	0	0	0	0	0	0	0	0	0	0	0	0	0	0	0	0
d1468	d1468.a1	d1468.a1.a1	Chassy_SC_4162;N1NZM6;CENPK specific;No description in SC288c, annotation and gene name in CENPK: Mid2p -CENPK1137D_703	0	0	1	1	1	0	0	0	0	0	1	2	0	0	1	1	0	0	0	0	0
d1752	d1752.a1	d1752.a1.a1	Chassy_SC_4161;N1NXZ8;Q03707; Inner nuclear membrane protein SRC1 - SRC1	0	0	1	0	0	0	0	0	0	0	0	0	0	0	0	0	1	0	0	0	1
c582	c582.a1	c582.a1.a1	Chassy_SC_4157;N1PAK0;P32898; Mitochondrial presequence protease - CYM1	1	6	10	7	8	4	0	7	9	5	7	5	0	0	8	3	11	2	9	0	1
d1051	d1051.a1	d1051.a1.a1	Chassy_SC_4155;N1P6D9;Q00816; Resistance to glucose repression protein 1 - REG1	1	0	3	1	1	0	1	1	3	2	2	0	1	0	3	1	2	0	4	0	0
d1514	d1514.a1	d1514.a1.a1	Chassy_SC_4153;N1P267;P36036; RNA annealing protein YRA2 - YRA2	0	0	1	1	2	0	0	0	0	0	1	1	0	0	0	0	1	0	0	0	0
c623	c623.a1	c623.a1.a1	Chassy_SC_415;N1P5J7;Q04439; Myosin-5 - MYO5	1	3	5	5	4	3	1	2	7	4	1	7	0	0	6	4	9	0	6	0	1
d1201	d1201.a1	d1201.a1.a1	Chassy_SC_4149;N1P1Y7;P40433; 6-phosphofructo-2-kinase 1 - PFK26	0	0	5	0	0	0	0	0	6	1	0	0	0	0	4	0	1	0	0	0	0
d1406	d1406.a1	d1406.a1.a1	Chassy_SC_4147;N1P546;CENPK specific;No description in SC288c, annotation and gene name in CENPK: Rsm18p -CENPK1137D_3454	0	1	0	1	3	0	0	1	0	1	3	0	0	0	0	0	0	0	0	0	0
d1918	d1918.a1	d1918.a1.a1	Chassy_SC_4146;N1P2R3;P36145; Transcription initiation factor IIE subunit beta - TFA2	0	0	0	0	0	0	0	0	0	0	1	0	0	0	0	0	0	0	0	0	0
c315	c315.a1	c315.a1.a1	Chassy_SC_4145;N1NYY6;P54861; Dynamin-related protein DNM1 - DNM1	5	11	14	12	10	11	6	13	12	16	13	13	7	8	13	15	18	6	17	6	5
c451	c451.a1	c451.a1.a1	Chassy_SC_4143;N1P5F6;P40010; Nuclear GTP-binding protein NUG1 - NUG1	0	7	11	9	16	6	1	11	11	9	16	11	0	0	7	11	13	1	12	0	0
c827	c827.a1	c827.a1.a1	Chassy_SC_4142;N1P052;P39105; Lysophospholipase 1 - PLB1	1	2	6	4	3	2	1	4	6	3	2	3	0	1	4	2	4	0	1	0	1
c948	c948.a1	c948.a1.a1	Chassy_SC_4141;N1NXF0;P28625; Protein YIM1 - YIM1	0	2	3	2	2	3	0	3	3	3	2	3	1	0	2	3	3	0	2	0	0
b63	b63.a1	b63.a1.a1	Chassy_SC_414;N1P9V4;P38972; Phosphoribosylformylglycinamidine synthase - ADE6	22	34	34	36	38	44	21	35	32	42	34	42	19	17	29	38	41	33	41	22	20
c873	c873.a1	c873.a1.a1	Chassy_SC_4138;N1P7D4;Q06685; Inositol hexakisphosphate and diphosphoinositol-pentakisphosphate kinase - VIP1	0	3	5	3	0	4	0	2	2	4	2	3	0	0	5	3	5	0	3	0	0
c251	c251.a1	c251.a1.a1	Chassy_SC_4137;N1P9Q1;P34216; EH domain-containing and endocytosis protein 1 - EDE1	11	14	22	14	16	14	10	11	20	11	21	16	6	8	16	13	22	12	14	6	7
c748	c748.a1	c748.a1.a1	Chassy_SC_4136;N1P4U2;P39101; Protein CAJ1 - CAJ1	1	5	4	2	4	3	0	4	6	5	5	5	0	0	4	5	3	2	3	0	0
c764	c764.a1	c764.a1.a1	Chassy_SC_4134;N1NZE3;Q05785; Epsin-2 - ENT2	1	2	3	0	2	3	0	3	8	0	3	2	0	1	4	2	3	2	0	1	0
c228	c228.a1	c228.a1.a1	Chassy_SC_4132;N1P8B2;P00950; Phosphoglycerate mutase 1 - GPM1	8	15	19	22	18	14	8	15	21	16	18	21	8	7	15	14	16	13	26	8	10
c814	c814.a1	c814.a1.a1	Chassy_SC_4128;N1P7C9;Q04175; Importin beta SMX1 - SXM1	0	4	4	3	2	3	0	1	6	4	1	8	1	0	5	3	4	2	1	0	0
c560	c560.a1	c560.a1.a1	Chassy_SC_4127;N1P0N4;P36049; rRNA-processing protein EBP2 - EBP2	2	4	5	6	9	10	2	2	6	10	5	10	1	0	7	9	8	5	8	0	0
d1489	d1489.a1	d1489.a1.a1	Chassy_SC_4126;N1P6G9;Q12025; Uncharacterized protein YDR056C - YDR056C	0	0	0	0	0	1	0	0	0	0	1	2	0	0	0	0	0	0	4	0	0
d1203	d1203.a1	d1203.a1.a1	Chassy_SC_4123;N1P374;P43586; 60S ribosomal subunit assembly/export protein LOC1 - LOC1	0	1	2	0	2	0	0	0	3	0	2	2	0	0	2	2	1	0	0	0	0
c231	c231.a1	c231.a1.a1	Chassy_SC_4122;N1P1H9;P26321; 60S ribosomal protein L5 - RPL5	6	14	15	18	20	16	8	18	18	17	22	18	9	9	12	20	22	14	20	9	6
b61	b61.a1	b61.a1.a1	Chassy_SC_412;N1NZP0;P15019; Transaldolase - TAL1	17	23	26	34	31	20	18	26	24	26	27	23	18	16	26	25	27	15	30	14	16
d1252	d1252.a1	d1252.a1.a1	Chassy_SC_4118;N1P3E0;Q01159; mRNA-capping enzyme subunit alpha - CEG1	0	0	0	2	1	2	0	0	1	3	0	2	0	0	0	0	2	0	2	0	0
c559	c559.a1	c559.a1.a1	Chassy_SC_4116;N1NWX2;Q12305; Thiosulfate sulfurtransferase RDL1, mitochondrial - RDL1	3	5	6	8	9	3	4	5	6	8	7	4	3	4	5	4	8	4	9	2	3
d1829	d1829.a1	d1829.a1.a1	Chassy_SC_4115;N1PAP7;P25560; Protein RER1 - RER1	0	0	0	1	0	0	0	1	0	0	0	0	0	0	0	0	0	0	0	0	0
c123	c123.a1	c123.a1.a1	Chassy_SC_4110;N1P5Z1;P32582; Cystathionine beta-synthase - CYS4	12	27	20	26	30	35	12	29	25	27	28	31	9	7	19	28	32	22	30	9	4
b41	b41.a1	b41.a1.a1	Chassy_SC_411;N1P652;P17709; Glucokinase-1 - GLK1	22	32	35	39	29	40	16	36	34	38	41	47	17	18	33	36	38	36	44	18	20
c260	c260.a1	c260.a1.a1	Chassy_SC_4109;N1P3G3;P00927; Threonine dehydratase, mitochondrial - ILV1	6	15	17	12	19	15	7	13	16	13	18	14	7	7	16	19	22	7	16	8	5
d1848	d1848.a1	d1848.a1.a1	Chassy_SC_4108;N1P2P5;P53322; High-affinity nicotinic acid transporter - TNA1	0	0	0	0	0	1	0	0	0	0	0	1	0	0	0	0	0	0	0	0	0
d1825	d1825.a1	d1825.a1.a1	Chassy_SC_4106;N1NYQ1;P38523; GrpE protein homolog, mitochondrial - MGE1	0	0	0	0	0	0	0	0	0	0	0	1	0	0	0	0	0	0	1	0	0
d1037	d1037.a1	d1037.a1.a1	Chassy_SC_4105;N1P4E5;P53311; Mitochondrial pyruvate carrier 3 - MPC3	0	2	3	3	1	0	0	1	3	4	2	0	0	0	1	2	2	0	4	0	0
c368	c368.a2	c368.a2.a1	Chassy_SC_4103;N1P6J6;P38247; Protein SLM4 - SLM4	0	1	2	0	2	0	0	1	0	2	0	0	0	0	0	0	2	0	0	0	0
c815	c815.a1	c815.a1.a1	Chassy_SC_4101;N1NXR3;P53721; Respiratory supercomplex factor 2, mitochondrial - RCF2	2	2	2	2	4	3	3	2	2	2	0	5	2	1	4	3	3	4	2	1	2
d1162	d1162.a1	d1162.a1.a1	Chassy_SC_41;N1NX68;Q05123; Actin-like protein ARP9 - ARP9	0	1	2	4	1	2	0	1	1	1	1	1	0	0	0	1	1	1	2	0	0
d1965	d1965.a1	d1965.a1.a1	Chassy_SC_4099;N1NYL6;Q03735; RNA-binding protein NAB6 - NAB6	0	1	0	0	0	0	0	0	0	0	0	0	0	0	0	0	0	0	0	0	0
d1759	d1759.a1	d1759.a1.a1	Chassy_SC_4098;N1P9H4;P38276; UPF0303 protein YBR137W - YBR137W	0	0	0	0	1	0	0	1	0	0	1	0	0	0	0	0	0	0	0	0	0
b64	b64.a1	b64.a1.a1	Chassy_SC_4096;N1P367;P46655; Glutamate--tRNA ligase, cytoplasmic - GUS1	27	33	34	40	42	35	25	35	33	42	32	36	27	22	28	36	36	28	34	22	24
d1346	d1346.a1	d1346.a1.a1	Chassy_SC_4095;N1P2J5;P38882; U3 small nucleolar RNA-associated protein 9 - UTP9	0	1	1	1	1	1	0	1	1	1	0	1	0	0	1	1	0	0	1	0	0
c593	c593.a1	c593.a1.a1	Chassy_SC_4094;N1P0E6;P36041; Protein EAP1 - EAP1	1	4	8	7	4	6	2	5	5	3	6	11	0	1	6	5	8	7	7	1	0
c361	c361.a2	c361.a2.a1	Chassy_SC_4092;N1NVX6;Q12672; 60S ribosomal protein L21-B - RPL21B	6	7	9	8	12	9	8	10	10	11	10	9	8	5	9	9	12	6	9	7	7
b84	b84.a1	b84.a1.a1	Chassy_SC_4091;N1P9H0;P16140; V-type proton ATPase subunit B - VMA2	24	29	28	33	33	34	25	30	28	29	30	36	17	19	24	28	32	25	38	22	24
c201	c201.a1	c201.a1.a1	Chassy_SC_4090;N1NZZ8;P11412; Glucose-6-phosphate 1-dehydrogenase - ZWF1	12	18	15	19	17	18	12	17	15	18	19	20	13	12	18	18	18	18	21	9	8
c163	c163.a1	c163.a1.a1	Chassy_SC_409;N1NW56;P41338; Acetyl-CoA acetyltransferase - ERG10	13	20	19	19	19	24	15	19	23	18	22	22	15	13	20	19	20	16	21	12	14
c324	c324.a1	c324.a1.a1	Chassy_SC_4089;N1NXZ7;P12695; Dihydrolipoyllysine-residue acetyltransferase component of pyruvate dehydrogenase complex, mitochondrial - LAT1	8	12	17	9	9	15	7	9	11	13	11	12	7	7	13	11	17	9	16	6	7
d1281	d1281.a1	d1281.a1.a1	Chassy_SC_4085;N1P0I9;P25303; DnaJ-related protein SCJ1 - SCJ1	0	0	1	0	1	1	0	1	1	0	1	2	0	0	1	1	0	0	4	0	0
d1631	d1631.a1	d1631.a1.a1	Chassy_SC_4084;N1NY81;Q04212; D-arabinose 1-dehydrogenase - ARA2	0	0	2	0	0	0	0	0	2	0	0	0	0	0	1	0	0	0	0	0	0
d1173	d1173.a1	d1173.a1.a1	Chassy_SC_4082;N1NVW5;Q08645; Folylpolyglutamate synthase - MET7	0	2	2	1	1	0	0	3	1	1	0	1	0	0	2	1	2	1	1	0	0
c424	c424.a1	c424.a1.a1	Chassy_SC_408;N1P3L5;P32598; Serine/threonine-protein phosphatase PP1-2 - GLC7	4	9	7	12	13	9	3	12	9	11	10	8	2	2	10	9	12	5	13	2	3
c468	c468.a1	c468.a1.a1	Chassy_SC_4079;N1P8D7;P05755; 40S ribosomal protein S9-B - RPS9B	4	5	13	7	14	5	3	8	8	6	9	5	3	4	8	8	5	4	7	4	2
c910	c910.a1	c910.a1.a1	Chassy_SC_4077;N1P7U3;P35723; Endoplasmic reticulum transmembrane protein 1 - YET1	1	3	2	2	3	1	1	4	3	2	3	1	1	0	3	2	3	1	2	0	2
c186	c186.a1	c186.a1.a1	Chassy_SC_4075;N1NZ14;P23542; Aspartate aminotransferase, cytoplasmic - AAT2	14	19	16	23	20	18	9	20	14	23	19	15	12	12	16	22	24	12	26	9	10
c216	c216.a1	c216.a1.a1	Chassy_SC_4072;N1NZH0;P15624; Phenylalanine--tRNA ligase beta subunit - FRS1	11	16	18	16	18	18	10	17	20	20	13	21	10	11	15	18	18	18	19	9	10
c366	c366.a1	c366.a1.a1	Chassy_SC_407;N1NXE4;P40212; 60S ribosomal protein L13-B - RPL13B	7	12	12	12	11	10	7	10	8	12	13	8	7	7	8	10	9	5	11	8	7
c558	c558.a2	c558.a2.a1	Chassy_SC_4067;N1P4S1;P38555; GTP-binding protein YPT31/YPT8 - YPT31	3	5	7	6	3	5	3	5	5	6	5	5	1	2	5	5	4	3	5	3	2
b80	b80.a1	b80.a1.a1	Chassy_SC_4066;N1P2A1;P36008; Elongation factor 1-gamma 2 - TEF4	18	17	18	19	20	18	13	15	19	18	17	20	11	13	15	17	20	13	21	16	15
c859	c859.a1	c859.a1.a1	Chassy_SC_4064;N1P155;P33421; Succinate dehydrogenase [ubiquinone] cytochrome b subunit, mitochondrial - SDH3	1	2	3	3	2	2	2	3	3	3	2	1	1	2	3	3	3	1	1	1	3
c388	c388.a1	c388.a1.a1	Chassy_SC_406;N1P1T9;P02406; 60S ribosomal protein L28 - RPL28	4	9	10	10	12	11	3	9	9	12	12	10	3	4	9	9	11	10	10	6	7
d1003	d1003.a1	d1003.a1.a1	Chassy_SC_4059;N1NZZ0;P32502; Translation initiation factor eIF-2B subunit beta - GCD7	0	1	3	2	2	2	0	3	3	1	1	3	0	0	4	2	2	0	2	0	0
b65	b65.a1	b65.a1.a1	Chassy_SC_4058;N1P2Q7;P22768; Argininosuccinate synthase - ARG1	22	45	37	18	40	38	20	40	40	24	41	42	19	21	30	36	53	33	28	20	20
d1329	d1329.a1	d1329.a1.a1	Chassy_SC_4056;N1P9K9;P07347; N-terminal acetyltransferase A complex catalytic subunit ARD1 - ARD1	0	0	1	0	2	2	0	1	0	1	1	2	0	0	0	1	1	0	0	0	0
c750	c750.a1	c750.a1.a1	Chassy_SC_4055;N1P755;P39939; 40S ribosomal protein S26-B - RPS26B	2	3	3	2	5	4	2	3	4	3	5	3	2	2	3	2	3	2	3	2	2
d1267	d1267.a1	d1267.a1.a1	Chassy_SC_4053;N1P266;P40533; Protein TED1 - TED1	1	0	2	1	2	0	1	0	0	1	0	0	0	1	1	2	1	0	1	0	0
b33	b33.a1	b33.a1.a1	Chassy_SC_4051;N1P0B3;P47169; Sulfite reductase [NADPH] subunit beta - MET5	33	58	51	62	65	65	28	69	54	54	66	58	26	28	39	66	74	38	64	24	27
d1088	d1088.a1	d1088.a1.a1	Chassy_SC_405;N1P1C1;Q05788; Purine nucleoside phosphorylase - PNP1	0	2	2	1	1	3	0	1	1	2	4	0	0	0	0	0	3	1	3	0	0
b38	b38.a1	b38.a1.a1	Chassy_SC_4048;N1P711;P17255; V-type proton ATPase catalytic subunit A - VMA1	33	46	48	55	52	53	35	48	50	48	50	55	31	28	52	54	60	45	61	21	30
d1211	d1211.a1	d1211.a1.a1	Chassy_SC_4044;N1P4S4;P19955; 37S ribosomal protein YMR-31, mitochondrial - YMR31	0	1	1	1	2	1	0	1	2	1	2	1	0	0	1	1	1	0	1	0	0
c987	c987.a1	c987.a1.a1	Chassy_SC_4039;N1P524;Q01080; DNA-directed RNA polymerase I subunit RPA49 - RPA49	0	2	1	2	3	3	0	1	2	2	2	2	0	0	1	2	6	1	3	0	0
c144	c144.a1	c144.a1.a1	Chassy_SC_4036;N1P553;P38764; 26S proteasome regulatory subunit RPN1 - RPN1	17	22	20	19	26	21	14	19	21	31	17	21	13	14	17	22	25	15	35	12	11
c122	c122.a1	c122.a1.a1	Chassy_SC_4034;N1P7Y2;P00817; Inorganic pyrophosphatase - IPP1	13	27	21	26	29	20	16	26	28	26	28	28	11	9	24	24	32	23	33	10	12
d1249	d1249.a1	d1249.a1.a1	Chassy_SC_4033;N1P946;P40523; Uncharacterized protein YIL055C - YIL055C	0	2	3	2	1	0	0	1	4	0	0	0	0	0	2	0	0	0	0	0	0
c321	c321.a1	c321.a1.a1	Chassy_SC_4030;N1P8B7;P05453; Eukaryotic peptide chain release factor GTP-binding subunit - SUP35	5	12	11	14	14	11	6	13	13	17	15	12	6	6	12	14	16	9	13	4	5
d1675	d1675.a1	d1675.a1.a1	Chassy_SC_403;N1NY06;P41819; Dimethyladenosine transferase - DIM1	0	0	0	1	1	0	0	0	0	0	0	1	0	0	1	0	0	0	0	0	0
d1649	d1649.a1	d1649.a1.a1	Chassy_SC_4023;N1P1G3;P46957; DNA polymerase delta small subunit - POL31	0	0	1	0	1	0	0	0	0	0	0	1	0	0	0	0	1	0	0	0	0
c771	c771.a1	c771.a1.a1	Chassy_SC_4020;N1P6H3;P38235; Uncharacterized protein YBR053C - YBR053C	1	5	6	4	3	0	0	4	8	4	4	1	1	0	4	4	5	0	4	0	0
d1730	d1730.a1	d1730.a1.a1	Chassy_SC_4015;N1PA73;P24279; DNA replication licensing factor MCM3 - MCM3	0	0	0	0	0	0	0	0	0	0	0	1	0	0	0	0	0	1	1	0	0
d1045	d1045.a1	d1045.a1.a1	Chassy_SC_4014;N1P676;P40970; Serine palmitoyltransferase 2 - LCB2	1	1	3	3	1	2	1	0	1	2	1	2	1	0	2	1	2	2	1	0	0
d1233	d1233.a1	d1233.a1.a1	Chassy_SC_401;N1PAJ1;Q12359; Ammonia transport outward protein 3 - ATO3	1	1	3	0	0	0	0	1	3	1	1	0	0	0	2	1	2	0	0	0	0
d2054	d2054.a1	d2054.a1.a1	Chassy_SC_4008;N1P625;P46948; Exosome complex component SKI6 - SKI6	0	0	0	0	1	0	0	0	0	0	0	0	0	0	0	0	0	0	0	0	0
d2063	d2063.a1	d2063.a1.a1	Chassy_SC_4005;N1NVS1;Q12324; Calcium channel YVC1 - YVC1	0	0	0	0	0	0	0	0	1	0	0	0	0	0	0	0	0	0	0	0	0
d1171	d1171.a1	d1171.a1.a1	Chassy_SC_4001;N1P490;P42826; Xylulose kinase - XKS1	0	1	1	2	2	1	0	1	1	1	1	1	0	0	1	1	3	0	2	0	0
c413	c413.a1	c413.a1.a1	Chassy_SC_4;N1P6W0;P07170; Adenylate kinase - ADK1	5	13	7	9	10	5	3	11	6	8	11	4	4	3	4	11	16	3	10	4	4
c265	c265.a1	c265.a1.a1	Chassy_SC_3995;N1PAT8;P38115; D-arabinose dehydrogenase [NAD(P)+] heavy chain - ARA1	8	14	10	9	18	10	7	15	18	15	19	15	7	10	14	22	19	6	14	8	8
c968	c968.a1	c968.a1.a1	Chassy_SC_3988;N1P6U1;P00546; Cyclin-dependent kinase 1 - CDC28	0	1	3	6	4	1	0	2	1	3	2	1	0	0	3	3	0	1	3	0	0
c545	c545.a1	c545.a1.a1	Chassy_SC_3987;N1P7D2;P08067; Cytochrome b-c1 complex subunit Rieske, mitochondrial - RIP1	5	6	7	7	6	5	4	7	4	5	8	4	5	3	6	9	6	4	7	3	3
c671	c671.a1	c671.a1.a1	Chassy_SC_3986;N1P4Q9;P23291; Casein kinase I homolog 1 - YCK1	1	2	4	3	5	5	0	2	4	2	4	7	0	1	5	3	6	0	4	1	0
d1204	d1204.a1	d1204.a1.a1	Chassy_SC_3984;N1P900;P38167; Protein ECM21 - ECM21	0	2	3	1	1	1	0	0	2	1	1	0	0	0	1	0	3	0	1	0	0
c408	c408.a1	c408.a1.a1	Chassy_SC_3982;N1PA55;P40075; Vesicle-associated membrane protein-associated protein SCS2 - SCS2	4	9	11	11	11	10	3	8	11	9	10	11	4	3	9	8	14	6	11	4	3
d1269	d1269.a1	d1269.a1.a1	Chassy_SC_3981;N1P4Z8;Q12009; tRNA (guanine-N(7)-)-methyltransferase - TRM8	0	1	1	2	1	1	0	0	0	0	1	0	0	0	1	2	2	0	2	0	0
d1349	d1349.a1	d1349.a1.a1	Chassy_SC_3978;N1NX29;Q02932; Importin beta-like protein KAP120 - KAP120	0	0	2	2	1	0	0	0	1	1	0	1	0	0	0	2	1	0	1	0	0
d1065	d1065.a1	d1065.a1.a1	Chassy_SC_3976;N1P8F9;CENPK specific;No description in SC288c, annotation and gene name in CENPK: Hem1p -CENPK1137D_4055	0	0	0	1	2	6	1	1	0	1	0	4	0	1	0	0	1	4	3	0	0
d1608	d1608.a1	d1608.a1.a1	Chassy_SC_3975;N1P459;P40540; ER membrane protein complex subunit 5 - EMC5	0	0	0	1	0	1	0	0	0	1	0	0	0	0	0	1	1	0	0	0	0
c514	c514.a1	c514.a1.a1	Chassy_SC_3974;N1P1H0;P10614; Lanosterol 14-alpha demethylase - ERG11	4	7	4	4	5	23	1	6	4	3	4	22	3	2	4	3	9	14	3	0	1
c747	c747.a1	c747.a1.a1	Chassy_SC_3973;N1NY13;P36534; 54S ribosomal protein L40, mitochondrial - MRPL40	0	6	2	5	7	3	0	5	4	3	3	6	0	0	1	4	4	4	4	0	0
d1323	d1323.a1	d1323.a1.a1	Chassy_SC_3971;N1P0Y9;P47075; Vacuolar transporter chaperone 4 - VTC4	0	0	0	1	1	3	0	1	0	2	0	3	0	0	0	1	0	0	0	0	0
c283	c283.a1	c283.a1.a1	Chassy_SC_3969;N1P2T1;P32558; FACT complex subunit SPT16 - SPT16	5	17	15	15	13	14	6	10	16	16	16	13	6	9	16	12	19	8	20	4	4
d1704	d1704.a1	d1704.a1.a1	Chassy_SC_3966;N1NX60;Q02890; Peptide-N(4)-(N-acetyl-beta-glucosaminyl)asparagine amidase - PNG1	0	0	1	0	1	0	0	0	1	0	0	0	0	0	0	0	0	0	0	0	0
c109	c109.a2	c109.a2.a1	Chassy_SC_3965;N1NWK7;Q12166; 2-isopropylmalate synthase 2, mitochondrial - LEU9	5	8	7	7	6	5	4	9	7	8	7	4	3	4	7	7	8	4	6	7	4
d1668	d1668.a1	d1668.a1.a1	Chassy_SC_3964;N1NWE9;Q12339; rRNA-processing protein UTP23 - UTP23	0	0	1	0	0	1	0	0	0	0	0	0	0	0	0	0	2	0	0	0	0
c850	c850.a1	c850.a1.a1	Chassy_SC_3963;N1P8Q3;Q06338; Protein BCP1 - BCP1	0	2	3	6	3	1	0	3	1	7	2	4	0	0	2	1	3	2	7	0	0
c155	c155.a1	c155.a1.a1	Chassy_SC_3962;N1P3A6;P13188; Glutamine--tRNA ligase - GLN4	15	20	25	23	19	20	12	19	23	22	22	21	13	11	20	22	24	15	27	11	11
d1364	d1364.a1	d1364.a1.a1	Chassy_SC_3961;N1P1F7;Q06146; Uncharacterized protein YLR257W - YLR257W	1	2	1	0	2	0	0	0	1	0	1	0	0	0	1	1	1	0	0	0	0
c574	c574.a1	c574.a1.a1	Chassy_SC_3960;N1P207;CENPK specific;No description in SC288c, annotation and gene name in CENPK: 40S ribosomal protein S21 -CENPK1137D_1496	3	7	5	8	7	4	2	7	2	6	7	3	3	2	3	4	7	1	10	2	2
c929	c929.a1	c929.a1.a1	Chassy_SC_3958;N1PAL0;Q12515; Protein PAR32 - PAR32	0	2	3	2	4	0	0	3	4	1	5	1	0	0	5	2	3	0	3	0	0
d1846	d1846.a1	d1846.a1.a1	Chassy_SC_3957;N1P386;P53177; tRNA wybutosine-synthesizing protein 3 - TYW3	0	0	1	0	1	0	0	0	0	0	0	0	0	0	0	0	0	0	0	0	0
d1000	d1000.a1	d1000.a1.a1	Chassy_SC_3956;N1P226;P38779; Proteasome-interacting protein CIC1 - CIC1	0	2	2	3	4	0	0	2	2	0	4	2	0	0	2	2	2	2	2	0	0
c740	c740.a1	c740.a1.a1	Chassy_SC_3953;N1P3I3;P53011; Nucleoporin SEH1 - SEH1	0	5	3	5	3	6	1	3	3	3	6	4	1	1	3	4	4	1	4	1	1
c285	c285.a1	c285.a1.a1	Chassy_SC_3952;N1PAT3;Q00764; Alpha,alpha-trehalose-phosphate synthase [UDP-forming] 56 kDa subunit - TPS1	7	14	16	13	19	14	7	13	16	12	13	14	6	6	16	13	17	8	15	7	6
d1125	d1125.a2	d1125.a2.a1	Chassy_SC_3950;N1P220;P53204; Nicotinamide/nicotinic acid mononucleotide adenylyltransferase 2 - NMA2	0	0	0	1	1	0	0	0	0	1	0	0	0	0	0	0	1	0	2	0	0
d1560	d1560.a1	d1560.a1.a1	Chassy_SC_395;N1P7V1;P25619; 30 kDa heat shock protein - HSP30	0	2	1	0	0	0	0	1	0	0	0	0	0	0	1	0	1	0	0	0	0
d1673	d1673.a1	d1673.a1.a1	Chassy_SC_3948;N1NVZ8;Q12344; GTPase-activating protein GYP5 - GYP5	0	0	1	0	0	0	0	0	1	0	0	0	0	0	0	0	1	1	0	0	0
d1917	d1917.a1	d1917.a1.a1	Chassy_SC_3946;N1P7A2;P33301;|reversed DNA repair protein XRS2 - XRS2	0	0	1	0	0	0	0	0	0	0	0	0	0	0	0	0	0	0	0	0	0
d1450	d1450.a1	d1450.a1.a1	Chassy_SC_3944;N1P8B5;P06101; Hsp90 co-chaperone Cdc37 - CDC37	0	0	3	2	1	0	0	0	1	0	1	0	0	0	1	0	0	0	0	0	0
d1447	d1447.a1	d1447.a1.a1	Chassy_SC_3942;N1NX75;Q12283; Malonyl CoA-acyl carrier protein transacylase, mitochondrial - MCT1	0	0	1	0	0	0	0	1	0	0	0	2	0	0	0	1	1	2	1	0	0
b56	b56.a1	b56.a1.a1	Chassy_SC_3941;N1P6G4;P00942; Triosephosphate isomerase - TPI1	18	33	40	48	38	27	18	39	37	46	46	34	20	23	36	41	44	26	52	20	14
d2017	d2017.a1	d2017.a1.a1	Chassy_SC_3940;N1P717;Q06344; Pre-rRNA-processing protein ESF1 - ESF1	0	0	0	0	0	0	0	0	0	0	0	0	0	0	0	1	0	0	0	0	0
d1016	d1016.a1	d1016.a1.a1	Chassy_SC_3939;N1P613;P07255; Cytochrome c oxidase subunit 7A - COX9	2	1	2	1	2	1	1	1	2	1	1	2	1	1	2	2	1	1	2	1	1
b58	b58.a2	b58.a2.a1	Chassy_SC_3937;N1P4P6;P34730; Protein BMH2 - BMH2	20	33	33	32	34	30	16	33	32	31	38	32	20	19	29	36	33	22	32	14	18
c879	c879.a1	c879.a1.a1	Chassy_SC_3936;N1P1W0;Q12532; Ribosome quality control complex subunit 2 - RQC2	0	3	3	4	1	0	0	2	3	4	3	3	0	0	4	3	4	0	7	0	0
d1379	d1379.a1	d1379.a1.a1	Chassy_SC_3933;N1P2S1;P36152; Fe-S cluster assembly protein DRE2 - DRE2	0	0	2	0	2	0	0	0	1	0	2	0	0	0	1	1	0	0	2	0	0
d1803	d1803.a1	d1803.a1.a1	Chassy_SC_3932;N1P8Y9;P34219;|reversed Transcriptional regulatory protein TOD6 - TOD6	0	0	0	1	0	0	0	0	0	1	0	0	0	0	0	0	0	0	0	0	0
c989	c989.a1	c989.a1.a1	Chassy_SC_3923;N1P487;P40563; Altered inheritance of mitochondria protein 21 - AIM21	0	0	7	0	5	0	0	1	3	0	5	1	0	0	3	2	5	0	0	0	0
d1294	d1294.a1	d1294.a1.a1	Chassy_SC_3922;N1P8I7;P38120; 37S ribosomal protein S9, mitochondrial - MRPS9	0	1	2	0	1	0	0	2	0	0	1	0	0	0	1	1	2	0	2	0	0
c351	c351.a1	c351.a1.a1	Chassy_SC_3921;N1P169;P33303; Succinate/fumarate mitochondrial transporter - SFC1	6	10	18	15	14	0	6	16	14	11	16	0	5	6	14	14	16	0	14	6	5
d1676	d1676.a1	d1676.a1.a1	Chassy_SC_3918;N1NZH2;P19145; General amino-acid permease GAP1 - GAP1	0	0	0	0	0	0	0	0	0	0	2	0	0	0	0	2	0	0	0	0	0
d1964	d1964.a1	d1964.a1.a1	Chassy_SC_3917;N1NXC7;P53894; Serine/threonine-protein kinase CBK1 - CBK1	0	0	0	0	0	0	0	0	0	0	0	0	0	0	0	0	0	0	1	0	0
d1585	d1585.a1	d1585.a1.a1	Chassy_SC_3916;N1P8M6;P38127; Mitochondrial carrier protein RIM2 - RIM2	0	1	1	0	0	1	0	0	0	0	0	1	0	0	1	0	1	0	0	0	0
d1456	d1456.a1	d1456.a1.a1	Chassy_SC_3910;N1P931;P32474; Protein disulfide-isomerase EUG1 - EUG1	0	0	1	0	1	0	0	1	1	0	1	2	0	0	0	0	1	1	0	0	0
c733	c733.a1	c733.a1.a1	Chassy_SC_3909;N1P7M6;Q99258; 3,4-dihydroxy-2-butanone 4-phosphate synthase - RIB3	1	7	5	2	5	2	1	7	3	1	6	3	0	0	3	4	9	2	3	0	0
d1220	d1220.a1	d1220.a1.a1	Chassy_SC_3905;N1P6N7;Q03761; Transcription initiation factor TFIID subunit 12 - TAF12	0	0	1	2	2	0	0	0	2	1	3	1	0	0	1	1	1	0	1	0	0
b30	b30.a1	b30.a1.a1	Chassy_SC_3904;N1P0C5;P38009; Bifunctional purine biosynthesis protein ADE17 - ADE17	24	41	31	48	45	45	23	42	37	55	47	52	23	19	29	48	48	41	55	21	21
c166	c166.a1	c166.a1.a1	Chassy_SC_3902;N1P3V6;P32476; Squalene monooxygenase - ERG1	17	24	17	5	20	30	17	21	15	5	22	31	18	20	12	23	23	24	5	16	12
d1841	d1841.a1	d1841.a1.a1	Chassy_SC_3901;N1NYH8;P33302; Pleiotropic ABC efflux transporter of multiple drugs - PDR5	0	0	1	0	0	0	0	0	0	0	0	0	0	0	1	0	0	0	0	0	0
c711	c711.a1	c711.a1.a1	Chassy_SC_39;N1NZH7;P27472; Glycogen [starch] synthase isoform 2 - GSY2	2	2	6	0	2	1	1	1	4	0	4	0	2	1	7	6	5	0	0	0	0
c903	c903.a1	c903.a1.a1	Chassy_SC_3898;N1P0M4;P34231; Uncharacterized protein YKL187C - YKL187C	1	3	7	0	2	0	1	4	3	0	4	0	1	1	4	3	4	0	0	1	2
b73	b73.a1	b73.a1.a1	Chassy_SC_3894;N1P4U3;P14832; Peptidyl-prolyl cis-trans isomerase - CPR1	10	17	22	16	21	11	10	20	20	13	21	10	7	7	14	19	25	7	13	5	11
d1380	d1380.a1	d1380.a1.a1	Chassy_SC_3893;N1NY10;P32911; Eukaryotic translation initiation factor eIF-1 - SUI1	0	1	0	0	3	0	0	1	1	0	2	0	0	0	0	1	2	0	0	0	0
c632	c632.a1	c632.a1.a1	Chassy_SC_3889;N1P1L8;Q02892; Nucleolar GTP-binding protein 1 - NOG1	3	5	5	7	7	7	2	5	6	5	3	5	2	1	4	5	7	3	3	1	1
d1818	d1818.a1	d1818.a1.a1	Chassy_SC_3888;N1P0Q6;Q03266; Aminodeoxychorismate lyase - ABZ2	0	0	0	0	0	0	0	0	1	0	0	0	0	0	0	0	1	0	0	0	0
d1441	d1441.a1	d1441.a1.a1	Chassy_SC_3886;N1NW54;Q06505; Transcription factor SPN1 - SPN1	0	3	1	0	0	0	0	0	1	0	3	0	0	0	0	0	0	0	1	0	0
d1152	d1152.a1	d1152.a1.a1	Chassy_SC_3884;N1P7S2;P25367; [PIN+] prion protein RNQ1 - RNQ1	0	0	1	2	1	1	2	2	1	2	1	1	1	0	1	0	1	1	2	0	0
c832	c832.a1	c832.a1.a1	Chassy_SC_3882;N1P1J3;P38765; Uncharacterized isomerase YHI9 - YHI9	0	5	2	1	5	1	0	3	4	0	6	2	0	0	3	5	8	2	1	1	0
d1036	d1036.a1	d1036.a1.a1	Chassy_SC_3881;N1NYM2;P06633; Imidazoleglycerol-phosphate dehydratase - HIS3	0	6	1	1	3	1	0	3	2	0	3	0	0	0	0	4	2	0	2	0	0
d1724	d1724.a1	d1724.a1.a1	Chassy_SC_3880;N1NWZ5;P42838; Alkylphosphocholine resistance protein LEM3 - LEM3	0	1	0	0	0	1	0	0	0	0	0	1	0	0	0	0	0	0	0	0	0
a4	a4.a1	a4.a1.a1	Chassy_SC_3878;N1NWL3;P19097; Fatty acid synthase subunit alpha - FAS2	79	120	111	133	123	94	91	119	114	125	125	97	77	88	93	130	155	74	129	75	78
d2052	d2052.a1	d2052.a1.a1	Chassy_SC_3875;N1NXQ6;P40161; Histone chaperone RTT106 - RTT106	0	0	0	0	0	0	0	0	0	0	0	0	0	0	0	1	0	0	0	0	0
d1880	d1880.a1	d1880.a1.a1	Chassy_SC_3871;N1P435;Q12191; Binder of USO1 and GRH1 protein 1 - BUG1	0	0	2	0	0	0	0	0	0	0	0	0	0	0	0	0	0	0	0	0	0
c644	c644.a1	c644.a1.a1	Chassy_SC_3870;N1PAA6;P12945; N-terminal acetyltransferase A complex subunit NAT1 - NAT1	1	4	5	4	5	5	3	4	5	5	5	4	2	2	5	4	8	5	7	1	0
d1544	d1544.a1	d1544.a1.a1	Chassy_SC_3867;N1P4C1;P45818; ATP-dependent RNA helicase ROK1 - ROK1	0	1	1	0	1	1	0	0	1	0	1	1	0	0	0	0	0	0	0	0	0
c966	c966.a1	c966.a1.a1	Chassy_SC_3866;N1P9U0;P53206; Putative cysteine synthase - YGR012W	0	1	5	1	1	3	1	0	4	0	1	2	0	0	5	4	3	0	4	0	0
d1667	d1667.a1	d1667.a1.a1	Chassy_SC_3864;N1P2N2;Q03497; Serine/threonine-protein kinase STE20 - STE20	0	0	2	0	0	0	0	0	0	0	0	0	0	0	2	0	0	0	0	0	0
d2087	d2087.a1	d2087.a1.a1	Chassy_SC_3862;N1P2C7;P40579; Uncharacterized oxidoreductase YIR035C - YIR035C	0	0	0	1	0	0	0	0	0	0	0	0	0	0	0	0	0	0	0	0	0
d1731	d1731.a1	d1731.a1.a1	Chassy_SC_3861;N1PAB2;P35182; Protein phosphatase 2C homolog 1 - PTC1	0	0	0	0	0	0	0	0	1	1	0	0	0	0	0	0	1	0	0	0	0
d1607	d1607.a1	d1607.a1.a1	Chassy_SC_3860;N1P9A4;P40472; Probable secreted beta-glucosidase SIM1 - SIM1	0	0	1	0	0	1	0	0	0	1	0	1	0	0	0	0	0	1	0	0	0
c299	c299.a2	c299.a2.a1	Chassy_SC_3859;N1NYW5;P05739; 60S ribosomal protein L6-B - RPL6B	6	10	13	13	15	5	7	10	12	7	13	4	4	2	11	13	13	3	10	4	4
d1119	d1119.a1	d1119.a1.a1	Chassy_SC_3856;N1P3X2;P47008; Phosphatidylinositol transfer protein SFH5 - SFH5	0	1	2	2	2	2	0	2	2	3	0	1	0	0	1	1	1	0	2	0	0
c683	c683.a1	c683.a1.a1	Chassy_SC_3854;N1P684;P25342; Cell division control protein 10 - CDC10	0	4	2	7	6	3	0	7	4	8	6	7	1	0	1	5	6	3	6	0	0
c494	c494.a1	c494.a1.a1	Chassy_SC_3852;N1NZY3;P53849; Zinc finger protein GIS2 - GIS2	4	6	6	8	9	9	4	6	6	8	7	9	3	5	5	7	7	7	11	3	4
c768	c768.a1	c768.a1.a1	Chassy_SC_3851;N1NYW3;P32337; Importin subunit beta-3 - PSE1	2	2	5	6	0	5	1	1	5	4	2	6	0	0	4	4	4	3	4	0	0
c872	c872.a1	c872.a1.a1	Chassy_SC_3850;N1P9Q0;P49687; Nucleoporin NUP145 - NUP145	0	3	5	5	3	2	0	1	4	4	3	3	0	0	0	1	6	1	2	1	0
c337	c337.a1	c337.a1.a1	Chassy_SC_3849;N1P1G0;P38754; 60S ribosomal protein L14-B - RPL14B	4	11	11	12	13	10	4	9	10	12	12	12	7	7	10	11	10	10	12	6	5
c468	c468.a2	c468.a2.a1	Chassy_SC_3847;N1NX76;CENPK specific;No description in SC288c, annotation and gene name in CENPK: Rps9ap -CENPK1137D_1619	1	3	5	3	5	3	1	4	5	3	4	2	1	1	4	3	3	1	2	1	0
c539	c539.a1	c539.a1.a1	Chassy_SC_3846;N1NWG0;P07703; DNA-directed RNA polymerases I and III subunit RPAC1 - RPC40	2	9	5	8	7	8	2	5	6	7	7	9	2	1	4	7	9	6	8	1	3
b36	b36.a2	b36.a2.a1	Chassy_SC_3844;N1P8D0;P09440; C-1-tetrahydrofolate synthase, mitochondrial - MIS1	3	11	14	14	15	7	6	14	9	12	14	8	3	4	7	11	14	6	14	4	5
d1251	d1251.a1	d1251.a1.a1	Chassy_SC_384;N1P6E9;Q03769; Epsin-5 - ENT5	0	1	3	2	1	0	0	0	2	1	1	0	0	0	1	1	2	0	0	0	0
d1620	d1620.a1	d1620.a1.a1	Chassy_SC_3830;N1NZ84;P41818; Protein GLC8 - GLC8	0	1	0	0	0	0	0	0	0	0	2	0	0	0	1	0	0	0	1	0	0
c602	c602.a1	c602.a1.a1	Chassy_SC_383;N1P3X1;P53081; NGG1-interacting factor 3 - NIF3	0	5	11	7	10	2	2	8	9	8	4	0	0	1	3	7	6	1	10	0	0
b46	b46.a1	b46.a1.a1	Chassy_SC_3829;N1NYH2;P19882; Heat shock protein 60, mitochondrial - HSP60	30	37	55	49	42	42	30	43	51	46	48	45	24	26	52	43	56	32	50	26	30
c554	c554.a2	c554.a2.a1	Chassy_SC_3825;N1P7C7;P34221; Protein phosphatase 2C homolog 3 - PTC3	1	4	5	3	2	4	1	4	3	4	3	2	1	1	3	5	4	0	5	1	0
d1058	d1058.a1	d1058.a1.a1	Chassy_SC_3824;N1P1I5;P53551; Histone H1 - HHO1	0	1	2	1	4	2	0	2	1	0	3	2	0	0	1	3	1	1	2	0	0
d1395	d1395.a1	d1395.a1.a1	Chassy_SC_3823;N1P6P0;P38089; Protein phosphatase 2C homolog 4 - PTC4	0	0	0	1	0	2	0	0	1	0	2	3	0	0	0	1	0	0	0	0	0
d1112	d1112.a1	d1112.a1.a1	Chassy_SC_3822;N1P447;P40160; Serine/threonine-protein kinase RIO2 - RIO2	0	1	2	3	1	1	1	1	1	2	1	2	0	0	1	1	1	1	2	0	0
c834	c834.a1	c834.a1.a1	Chassy_SC_3821;N1NWQ2;Q08225; Probable dipeptidyl peptidase 3 - YOL057W	1	2	3	3	5	1	1	4	2	3	2	2	0	0	2	4	7	0	6	0	1
d1332	d1332.a1	d1332.a1.a1	Chassy_SC_3820;N1P914;CENPK specific;No description in SC288c, annotation and gene name in CENPK: Uncharacterized protein -CENPK1137D_1480	0	0	0	1	0	1	0	0	0	3	0	1	0	0	0	0	1	1	4	0	0
d1679	d1679.a1	d1679.a1.a1	Chassy_SC_3819;N1P4S5;P32899; U3 small nucleolar ribonucleoprotein protein IMP3 - IMP3	0	0	1	1	1	0	0	0	0	0	1	0	0	0	0	0	0	0	0	0	0
a5	a5.a2	a5.a2.a1	Chassy_SC_3818;N1P185;P03965; Carbamoyl-phosphate synthase arginine-specific large chain - CPA2	14	38	30	23	30	35	16	39	27	21	32	41	18	18	23	34	46	16	29	15	15
b45	b45.a1	b45.a1.a1	Chassy_SC_3814;N1NXM0;P23254; Transketolase 1 - TKL1	15	27	24	33	33	32	19	31	26	33	27	30	16	14	21	29	34	23	29	16	20
d2092	d2092.a1	d2092.a1.a1	Chassy_SC_3812;N1P2M8;P53313; Protein SDA1 - SDA1	0	0	0	0	0	0	0	0	0	0	0	0	0	0	0	0	0	0	1	0	0
d1215	d1215.a1	d1215.a1.a1	Chassy_SC_381;N1P0K1;P46956; Inorganic phosphate transporter PHO86 - PHO86	0	1	1	2	1	1	0	0	3	0	0	1	0	0	2	1	1	1	2	0	0
d1723	d1723.a1	d1723.a1.a1	Chassy_SC_3805;N1P5I1;P34087; DNA-directed RNA polymerase II subunit RPB7 - RPB7	0	0	0	0	1	0	0	0	0	1	0	0	0	0	0	0	1	0	0	0	0
d1490	d1490.a1	d1490.a1.a1	Chassy_SC_3803;N1NWT0;P53629; Sterol O-acyltransferase 2 - ARE2	1	0	1	0	1	0	0	0	0	0	0	1	0	0	1	1	1	1	0	0	0
c208	c208.a1	c208.a1.a1	Chassy_SC_3802;N1P719;(P0CX40-P0CX39);40S ribosomal protein S8- NA	8	19	15	15	25	19	8	20	17	18	21	17	11	12	16	18	21	12	20	9	10
c478	c478.a1	c478.a1.a1	Chassy_SC_3800;N1NXS1;Q06494; Putative pyridoxal reductase - YPR127W	4	8	12	9	13	0	5	8	13	8	11	0	3	5	10	11	10	0	4	3	4
c712	c712.a1	c712.a1.a1	Chassy_SC_3797;N1P4G8;P40506; Phosphopantothenate--cysteine ligase CAB2 - CAB2	0	3	3	5	3	9	0	4	3	7	2	7	1	0	2	4	4	5	8	0	0
d1083	d1083.a1	d1083.a1.a1	Chassy_SC_3796;N1P0Q0;P40561; RNA-binding protein SGN1 - SGN1	0	1	3	0	3	1	0	2	3	1	3	0	0	0	2	1	1	0	3	0	0
c335	c335.a1	c335.a1.a1	Chassy_SC_3794;N1NX15;P35844; Oxysterol-binding protein homolog 4 - KES1	7	12	10	9	14	14	8	11	18	14	8	11	8	7	11	11	14	5	17	5	4
c184	c184.a2	c184.a2.a1	Chassy_SC_3791;N1P9E8;P18759; Vesicular-fusion protein SEC18 - SEC18	1	4	8	11	7	6	0	4	3	11	4	8	0	0	1	4	6	3	10	0	1
b90	b90.a1	b90.a1.a1	Chassy_SC_3790;N1P7F3;P32316; Acetyl-CoA hydrolase - ACH1	20	23	30	40	33	23	13	24	42	46	33	20	14	15	31	32	32	15	50	14	17
c957	c957.a1	c957.a1.a1	Chassy_SC_3788;N1P3A7;P43609; Chromatin structure-remodeling complex protein RSC8 - RSC8	0	2	2	1	2	4	0	2	4	0	2	3	0	0	2	3	5	1	3	0	0
d1095	d1095.a1	d1095.a1.a1	Chassy_SC_3785;N1P7I4;P32472; Peptidyl-prolyl cis-trans isomerase FPR2 - FPR2	0	1	2	2	3	0	0	2	1	1	4	0	0	0	2	2	3	0	1	0	0
d1412	d1412.a1	d1412.a1.a1	Chassy_SC_3784;N1P2Q2;P53326; Uncharacterized protein YGR266W - YGR266W	0	0	1	0	0	0	0	0	1	2	0	0	0	0	1	0	3	0	2	0	0
d1223	d1223.a1	d1223.a1.a1	Chassy_SC_3781;N1NZD3;Q06252; Uncharacterized protein YLR179C - YLR179C	0	1	2	2	1	0	0	1	2	1	1	0	0	0	2	1	1	0	1	0	0
b73	b73.a3	b73.a3.a1	Chassy_SC_3778;N1NXV9;P25719; Peptidyl-prolyl cis-trans isomerase C, mitochondrial - CPR3	2	5	5	5	6	2	1	5	6	5	8	3	1	1	5	5	6	2	6	1	1
d1637	d1637.a1	d1637.a1.a1	Chassy_SC_3777;N1P903;P46995; Histone-lysine N-methyltransferase, H3 lysine-36 specific - SET2	0	0	0	0	0	1	0	1	0	1	0	1	0	0	0	0	0	0	1	0	0
d1018	d1018.a1	d1018.a1.a1	Chassy_SC_3773;N1P4C8;P32566; Cell wall assembly regulator SMI1 - SMI1	0	1	3	1	3	1	0	3	3	1	4	0	0	0	2	1	4	0	1	0	1
d1979	d1979.a1	d1979.a1.a1	Chassy_SC_3770;N1P6U8;Q06639; Chromatin structure-remodeling complex protein RSC3 - RSC3	0	0	0	0	0	0	0	0	0	0	0	1	0	0	0	0	0	0	0	0	0
c657	c657.a1	c657.a1.a1	Chassy_SC_3766;N1NVM5;Q06625; Glycogen debranching enzyme - GDB1	2	4	7	1	5	6	0	2	9	1	4	6	1	1	8	10	8	4	0	1	1
c177	c177.a1	c177.a1.a1	Chassy_SC_3765;N1P4H4;(P0CX48-P0CX47);40S ribosomal protein S11- NA	17	18	17	19	21	20	17	18	19	17	21	15	15	14	16	17	19	14	20	15	12
c362	c362.a1	c362.a1.a1	Chassy_SC_3764;N1NWA0;P41807; V-type proton ATPase subunit H - VMA13	6	12	12	9	11	14	8	10	10	11	9	17	5	5	9	11	10	10	11	4	4
d1688	d1688.a1	d1688.a1.a1	Chassy_SC_3762;N1P9J2;P33754; Translocation protein SEC66 - SEC66	0	0	1	1	0	0	0	0	0	0	0	1	0	0	0	1	0	0	0	0	0
d1166	d1166.a1	d1166.a1.a1	Chassy_SC_3760;N1P760;Q06678; 54S ribosomal protein L35, mitochondrial - MRPL35	0	2	2	1	2	2	0	2	1	2	0	2	0	0	0	1	1	1	1	0	0
d2035	d2035.a1	d2035.a1.a1	Chassy_SC_3759;N1P1J2;Q02950; 37S ribosomal protein MRP51, mitochondrial - MRP51	0	0	0	0	1	0	0	0	0	0	0	0	0	0	0	0	0	0	0	0	0
c745	c745.a1	c745.a1.a1	Chassy_SC_3756;N1NXN9;P53981; Uncharacterized phosphatase YNL010W - YNL010W	1	4	5	5	6	0	1	6	4	5	5	0	0	1	3	6	5	0	3	0	1
d1832	d1832.a1	d1832.a1.a1	Chassy_SC_3754;N1P753;Q04177; U3 small nucleolar RNA-associated protein 5 - UTP5	0	0	1	0	0	0	0	0	0	0	0	0	0	0	0	0	1	0	0	0	0
d1306	d1306.a1	d1306.a1.a1	Chassy_SC_3749;N1NVR5;Q08446; Protein SGT1 - SGT1	0	0	3	1	1	0	0	0	2	1	1	0	0	0	1	1	1	0	1	0	0
c802	c802.a1	c802.a1.a1	Chassy_SC_3748;N1P8P9;P07285; Anthranilate phosphoribosyltransferase - TRP4	1	6	6	2	5	2	2	7	2	1	3	0	0	0	2	4	8	0	2	0	0
d1952	d1952.a1	d1952.a1.a1	Chassy_SC_3744;N1NWQ0;P53969; Sorting assembly machinery 50 kDa subunit - SAM50	0	0	0	0	0	0	0	0	0	0	0	0	0	0	1	0	0	0	0	0	0
d1341	d1341.a1	d1341.a1.a1	Chassy_SC_3737;N1P300;Q08421; Enhancer of translation termination 1 - ETT1	0	1	0	1	2	0	0	2	1	0	0	1	0	0	0	2	1	0	1	0	0
d1109	d1109.a1	d1109.a1.a1	Chassy_SC_3735;N1P8S5;P38333; Essential nuclear protein 1 - ENP1	0	1	0	2	2	1	0	3	3	1	1	1	0	0	2	3	1	0	2	0	0
c534	c534.a1	c534.a1.a1	Chassy_SC_3733;N1NWR8;Q12068; NADPH-dependent methylglyoxal reductase GRE2 - GRE2	3	3	3	22	6	0	2	2	3	20	7	0	4	3	3	9	3	0	21	2	1
c601	c601.a1	c601.a1.a1	Chassy_SC_3731;N1P463;Q01852; Mitochondrial import inner membrane translocase subunit TIM44 - TIM44	1	5	6	7	6	5	0	8	6	7	7	6	0	0	5	7	8	1	8	1	0
d1238	d1238.a1	d1238.a1.a1	Chassy_SC_3723;N1P364;P47047; ATP-dependent RNA helicase DOB1 - MTR4	0	2	2	4	1	2	0	1	0	2	0	1	0	0	0	0	1	0	0	0	0
d1797	d1797.a1	d1797.a1.a1	Chassy_SC_3722;N1P1P5;P53125;|reversed Imitation switch two complex protein 1 - ITC1	0	0	2	0	0	0	0	0	0	0	0	0	0	0	0	0	0	0	0	0	0
c328	c328.a1	c328.a1.a1	Chassy_SC_3714;N1P1E5;P39077; T-complex protein 1 subunit gamma - CCT3	5	14	13	16	15	13	3	14	12	15	13	13	5	5	10	12	15	7	14	6	4
d1397	d1397.a1	d1397.a1.a1	Chassy_SC_3713;N1P788;Q04081; Leucine carboxyl methyltransferase 1 - PPM1	0	1	1	0	1	1	0	1	1	0	0	0	0	0	2	0	2	0	0	0	0
d1988	d1988.a1	d1988.a1.a1	Chassy_SC_3711;N1PAA1;Q07395; Synchronized import protein 1 - SYO1	0	0	0	0	0	0	0	0	0	1	0	0	0	0	0	0	0	0	0	0	0
c178	c178.a1	c178.a1.a1	Chassy_SC_371;N1P7W9;P32861; UTP--glucose-1-phosphate uridylyltransferase - UGP1	11	20	21	19	22	19	10	18	22	21	17	22	11	12	17	17	25	9	25	13	10
d1700	d1700.a1	d1700.a1.a1	Chassy_SC_3709;N1P5D1;P40089; U6 snRNA-associated Sm-like protein LSm5 - LSM5	0	0	0	1	1	0	0	1	0	0	0	0	0	0	0	0	1	0	0	0	0
d1940	d1940.a1	d1940.a1.a1	Chassy_SC_3708;N1P0E2;Q02795; Dolichyl-diphosphooligosaccharide--protein glycosyltransferase subunit SWP1 - SWP1	0	0	0	0	0	0	0	0	0	0	0	0	0	0	1	0	0	0	0	0	0
c841	c841.a1	c841.a1.a1	Chassy_SC_3706;N1NVN8;Q08926; ULP1-interacting protein 4 - UIP4	0	0	8	0	5	0	0	3	8	0	10	0	0	0	3	8	2	0	0	0	0
c267	c267.a1	c267.a1.a1	Chassy_SC_3705;N1PAT7;P38113; Alcohol dehydrogenase 5 - ADH5	11	12	15	10	14	15	9	13	16	10	13	18	9	8	15	15	13	19	12	9	9
b53	b53.a1	b53.a1.a1	Chassy_SC_3704;N1PA88;P25694; Cell division control protein 48 - CDC48	22	35	34	47	49	45	28	41	41	42	49	51	23	21	38	45	42	32	51	21	18
c173	c173.a1	c173.a1.a1	Chassy_SC_3703;N1P8H9;P15202; Peroxisomal catalase A - CTA1	13	26	27	21	20	0	15	27	24	24	19	0	15	13	22	19	32	0	28	12	12
c427	c427.a1	c427.a1.a1	Chassy_SC_370;N1P5J9;P32628; UV excision repair protein RAD23 - RAD23	5	10	8	9	10	10	5	9	11	10	11	9	1	4	9	6	13	5	11	3	4
d2057	d2057.a1	d2057.a1.a1	Chassy_SC_37;N1P5P0;P53070; Mitochondrial translation optimization protein 1 - MTO1	0	0	0	0	0	0	0	0	0	0	0	0	0	0	0	0	0	0	1	0	0
d1923	d1923.a1	d1923.a1.a1	Chassy_SC_3698;N1P762;P38338;|reversed Uncharacterized protein YBR259W - YBR259W	0	0	0	0	0	0	0	1	0	0	0	0	0	0	0	0	0	0	0	0	0
d1989	d1989.a1	d1989.a1.a1	Chassy_SC_3694;N1P1E6;P38747; OTU domain-containing protein 2 - OTU2	0	0	0	0	0	0	0	0	0	0	0	0	0	0	0	0	0	0	1	0	0
d1968	d1968.a1	d1968.a1.a1	Chassy_SC_3693;N1P6P5;P43573; Bud site selection protein 27 - BUD27	0	0	0	0	0	0	0	0	0	0	1	0	0	0	0	0	0	0	0	0	0
b75	b75.a1	b75.a1.a1	Chassy_SC_3691;N1P4X6;P09624; Dihydrolipoyl dehydrogenase, mitochondrial - LPD1	20	33	35	36	40	27	17	37	41	42	37	37	16	14	33	31	37	23	43	14	15
d2049	d2049.a1	d2049.a1.a1	Chassy_SC_3690;N1NYV1;P40219; Outer spore wall protein 5 - OSW5	0	0	0	0	0	0	0	0	1	0	0	0	0	0	0	0	0	0	0	0	0
d1205	d1205.a1	d1205.a1.a1	Chassy_SC_369;N1P416;P50087; MICOS subunit MIC26 - MIC26	0	2	1	2	1	0	0	1	2	2	1	1	0	0	1	1	1	0	1	0	0
c585	c585.a1	c585.a1.a1	Chassy_SC_3687;N1P0V1;P40471; NADPH-dependent 1-acyldihydroxyacetone phosphate reductase - AYR1	2	5	7	4	6	5	3	6	6	4	5	5	4	2	8	7	9	4	3	3	3
d1465	d1465.a1	d1465.a1.a1	Chassy_SC_3686;N1P2K6;Q08969; Protein GRE1 - GRE1	0	0	2	0	0	0	0	1	0	0	1	0	0	0	1	1	2	0	0	0	0
d1348	d1348.a1	d1348.a1.a1	Chassy_SC_3685;N1P1J5;Q05902; Glutathione hydrolase proenzyme - ECM38	0	0	0	1	1	0	0	0	1	0	2	1	0	0	0	2	2	0	2	0	0
d1415	d1415.a1	d1415.a1.a1	Chassy_SC_3684;N1P078;P47141; 37S ribosomal protein S26, mitochondrial - RSM26	0	0	1	1	1	1	0	0	1	1	1	1	0	0	0	1	0	0	1	0	0
d1808	d1808.a1	d1808.a1.a1	Chassy_SC_3683;N1NZ35;Q04806;|reversed Glutathione S-transferase omega-like 3 - GTO3	0	0	0	0	0	0	0	0	0	0	0	0	0	0	0	1	1	0	0	0	0
c191	c191.a1	c191.a1.a1	Chassy_SC_3677;N1NWK6;P15303; Protein transport protein SEC23 - SEC23	8	24	16	20	19	22	11	19	22	22	15	23	8	10	18	23	22	15	20	6	7
d1042	d1042.a1	d1042.a1.a1	Chassy_SC_3676;N1NVN4;P06245; cAMP-dependent protein kinase type 2 - TPK2	0	1	4	0	1	0	0	1	4	0	2	0	0	0	3	2	0	1	0	0	0
d1896	d1896.a1	d1896.a1.a1	Chassy_SC_3671;N1P164;Q9P305; mRNA stability protein IGO2 - IGO2	0	0	0	0	0	0	1	0	0	0	0	0	0	0	0	0	0	0	0	0	0
d1738	d1738.a1	d1738.a1.a1	Chassy_SC_367;N1NYN6;P38630; Replication factor C subunit 1 - RFC1	0	0	3	0	0	0	0	0	0	0	0	0	0	0	0	0	0	0	0	0	0
c461	c461.a1	c461.a1.a1	Chassy_SC_3669;N1P7X2;P37262; 6-phosphogluconolactonase-like protein 2 - SOL2	1	8	7	7	7	7	2	8	10	7	12	6	3	1	5	6	13	2	6	3	2
d2016	d2016.a1	d2016.a1.a1	Chassy_SC_3667;N1P9I8;P38698; Exopolyphosphatase - PPX1	0	0	1	0	0	0	0	0	0	0	0	0	0	0	0	0	0	0	0	0	0
c570	c570.a1	c570.a1.a1	Chassy_SC_3665;N1P5W2;P11745; Ran GTPase-activating protein 1 - RNA1	2	7	8	7	8	2	2	6	6	5	7	5	2	2	7	9	9	2	8	1	2
d1262	d1262.a1	d1262.a1.a1	Chassy_SC_3664;N1P307;Q08285; Exosome complex component RRP40 - RRP40	0	0	0	2	0	1	0	1	0	3	1	1	0	0	0	2	2	0	2	0	0
d1069	d1069.a1	d1069.a1.a1	Chassy_SC_366;N1NYA2;Q08438; Phosphopantothenoylcysteine decarboxylase subunit VHS3 - VHS3	0	0	4	4	0	0	0	1	4	3	1	1	0	0	1	2	2	0	2	0	0
d1231	d1231.a1	d1231.a1.a1	Chassy_SC_3659;N1P6U9;P43612; SIT4-associating protein SAP155 - SAP155	0	0	0	4	1	1	0	0	1	2	0	2	0	0	1	2	0	0	2	0	0
b31	b31.a1	b31.a1.a1	Chassy_SC_3658;N1P1J4;P0CS90; Heat shock protein SSC1, mitochondrial - SSC1	37	44	50	56	52	57	33	51	60	55	59	68	37	38	47	46	71	55	74	35	40
c689	c689.a1	c689.a1.a1	Chassy_SC_3655;N1P2B0;P38836; Putative metallocarboxypeptidase ECM14 - ECM14	1	4	5	4	5	4	1	5	6	5	7	4	1	1	5	5	5	2	5	0	0
d1851	d1851.a1	d1851.a1.a1	Chassy_SC_3654;N1P891;P38112; ATP-dependent RNA helicase MAK5 - MAK5	0	0	0	1	0	0	0	0	0	0	0	0	0	0	0	0	0	0	1	0	0
d1613	d1613.a1	d1613.a1.a1	Chassy_SC_3652;N1PAI0;Q06682; UBX domain-containing protein 5 - UBX5	0	0	0	1	0	0	0	0	2	0	0	0	0	0	1	0	0	0	1	0	0
b25	b25.a3	b25.a3.a1	Chassy_SC_3651;N1P9M4;P38063; Ribose-phosphate pyrophosphokinase 4 - PRS4	0	0	1	2	2	3	0	4	3	2	3	0	0	2	2	3	3	2	3	0	0
d1407	d1407.a1	d1407.a1.a1	Chassy_SC_3649;N1P2U6;P32799; Cytochrome c oxidase subunit 6A, mitochondrial - COX13	0	1	0	0	1	0	0	1	0	1	1	1	0	0	1	1	0	1	1	0	0
c829	c829.a1	c829.a1.a1	Chassy_SC_3642;N1PA26;P43590; Uncharacterized peptidase YFR006W - YFR006W	0	1	2	7	4	3	0	5	1	7	1	3	0	0	1	4	4	0	7	0	0
c288	c288.a1	c288.a1.a1	Chassy_SC_3641;N1PAR5;P38077; ATP synthase subunit gamma, mitochondrial - ATP3	8	11	14	17	15	10	7	15	12	15	15	13	7	11	9	16	17	11	13	5	9
c337	c337.a2	c337.a2.a1	Chassy_SC_3635;N1NZD8;P36105; 60S ribosomal protein L14-A - RPL14A	3	10	10	11	12	9	4	10	8	12	11	13	7	6	9	10	10	9	11	5	4
d1807	d1807.a1	d1807.a1.a1	Chassy_SC_3633;N1P5E1;P11746; Pheromone receptor transcription factor - MCM1	0	0	1	0	0	0	0	1	0	0	0	0	0	0	0	0	0	0	0	0	0
c744	c744.a1	c744.a1.a1	Chassy_SC_3632;N1P3W7;P48362; Protein HGH1 - HGH1	0	2	5	3	4	4	0	2	4	6	3	9	0	0	3	5	4	2	6	0	0
d2012	d2012.a1	d2012.a1.a1	Chassy_SC_3631;N1NVG3;P19516; Cytochrome c oxidase assembly protein COX11, mitochondrial - COX11	0	0	1	0	0	0	0	0	0	0	0	0	0	0	0	0	0	0	0	0	0
c992	c992.a1	c992.a1.a1	Chassy_SC_3630;N1P8A6;P38174; Methionine aminopeptidase 2 - MAP2	0	1	4	1	3	1	0	5	2	0	5	0	0	0	2	2	4	0	2	0	0
b21	b21.a2	b21.a2.a1	Chassy_SC_3628;N1P8L4;P39533; Homocitrate dehydratase, mitochondrial - ACO2	20	23	24	20	28	31	22	28	25	27	29	28	19	19	22	28	31	19	25	19	15
d1289	d1289.a1	d1289.a1.a1	Chassy_SC_3625;N1P9N6;P36526; 54S ribosomal protein L27, mitochondrial - MRPL27	0	1	0	0	2	1	0	1	0	0	2	1	0	0	1	1	2	0	1	0	0
c206	c206.a1	c206.a1.a1	Chassy_SC_3621;N1NWM8;P25491; Mitochondrial protein import protein MAS5 - YDJ1	11	15	28	22	20	12	11	14	22	21	16	17	8	7	18	16	19	11	27	10	7
d2050	d2050.a1	d2050.a1.a1	Chassy_SC_3620;N1P2A5;P40566; Uncharacterized glycosyl hydrolase YIR007W - YIR007W	0	0	0	0	0	0	0	0	0	0	0	1	0	0	0	0	0	0	0	0	0
d1814	d1814.a1	d1814.a1.a1	Chassy_SC_3614;N1P5Y2;P48234; Ribosome biogenesis protein ENP2 - ENP2	0	0	1	0	0	0	0	0	0	0	0	0	0	0	1	0	0	0	0	0	0
d1256	d1256.a1	d1256.a1.a1	Chassy_SC_3611;N1NX92;Q08647; Multisubstrate pseudouridine synthase 7 - PUS7	0	2	0	1	3	0	0	1	0	0	1	3	0	0	0	1	1	0	2	0	0
d1175	d1175.a1	d1175.a1.a1	Chassy_SC_3607;N1NZ71;P32386; ATP-dependent bile acid permease - YBT1	0	2	1	0	1	1	1	1	2	1	0	3	0	0	1	0	5	0	0	0	0
c765	c765.a1	c765.a1.a1	Chassy_SC_3605;N1NZR4;P28707; Co-chaperone protein SBA1 - SBA1	2	4	6	2	3	1	2	3	5	1	4	2	2	2	4	5	5	1	2	1	1
d1403	d1403.a1	d1403.a1.a1	Chassy_SC_3604;N1P2G3;Q12374; Nuclear control of ATPase protein 2 - NCA2	0	1	3	0	1	1	0	0	0	0	0	1	0	0	1	0	2	0	0	0	0
c504	c504.a1	c504.a1.a1	Chassy_SC_36;N1P4M8;P22147; 5'-3' exoribonuclease 1 - XRN1	2	11	10	10	12	6	0	6	7	12	7	5	0	0	8	7	12	4	12	0	0
d1149	d1149.a1	d1149.a1.a1	Chassy_SC_3598;N1P8B1;P30619; Protein transport protein SEC1 - SEC1	0	0	1	1	0	1	0	0	2	2	1	4	0	0	1	2	3	1	2	0	0
c881	c881.a1	c881.a1.a1	Chassy_SC_3596;N1P7K8;Q04432; Glutathione-independent glyoxalase HSP31 - HSP31	0	2	4	1	7	1	1	2	1	1	8	1	0	0	1	6	4	1	1	1	0
d1217	d1217.a1	d1217.a1.a1	Chassy_SC_3595;N1P3B0;P41543; Dolichyl-diphosphooligosaccharide--protein glycosyltransferase subunit 1 - OST1	0	0	0	0	2	1	0	0	1	2	1	4	0	0	1	0	3	0	2	0	0
c162	c162.a1	c162.a1.a1	Chassy_SC_3590;N1P5A5;P25087; Sterol 24-C-methyltransferase - ERG6	14	19	17	18	23	24	15	20	14	16	23	23	15	13	17	22	23	20	18	16	13
d1483	d1483.a1	d1483.a1.a1	Chassy_SC_3585;N1NX20;Q12412; Protein PNS1 - PNS1	0	0	2	1	0	0	0	0	1	1	0	0	0	0	0	1	0	0	2	0	0
c169	c169.a1	c169.a1.a1	Chassy_SC_3583;N1NX07;P07267; Saccharopepsin - PEP4	10	19	26	16	25	23	10	21	23	17	21	20	13	11	21	21	28	13	20	9	9
d1556	d1556.a1	d1556.a1.a1	Chassy_SC_3579;N1P379;Q99216; Pre-rRNA-processing protein PNO1 - PNO1	0	0	0	0	4	0	0	0	0	0	0	0	0	0	0	0	0	0	2	0	0
b57	b57.a1	b57.a1.a1	Chassy_SC_3577;N1P1B4;Q12460; Nucleolar protein 56 - NOP56	9	25	23	25	25	24	14	22	19	27	22	27	13	12	18	23	32	20	24	11	8
c187	c187.a1	c187.a1.a1	Chassy_SC_3572;N1NZY1;P09938; Ribonucleoside-diphosphate reductase small chain 1 - RNR2	14	16	16	15	19	24	16	17	20	15	15	29	11	12	15	21	24	18	12	13	11
c579	c579.a1	c579.a1.a1	Chassy_SC_3571;N1NXA1;P24280; SEC14 cytosolic factor - SEC14	1	5	2	7	7	5	3	8	7	5	8	6	1	1	4	7	10	3	6	3	1
c629	c629.a1	c629.a1.a1	Chassy_SC_357;N1P6K6;P32485; Mitogen-activated protein kinase HOG1 - HOG1	1	2	3	6	4	6	1	5	3	4	2	4	1	1	3	5	6	2	5	1	1
c690	c690.a1	c690.a1.a1	Chassy_SC_3564;N1P5U7;P35197; ADP-ribosylation factor GTPase-activating protein GCS1 - GCS1	1	7	5	4	7	4	0	5	7	4	7	4	0	0	4	6	6	1	3	0	0
c172	c172.a1	c172.a1.a1	Chassy_SC_3563;N1P5S7;P38427; Trehalose synthase complex regulatory subunit TSL1 - TSL1	11	14	24	17	17	1	9	16	24	16	20	2	10	7	24	18	19	0	19	6	6
d1594	d1594.a1	d1594.a1.a1	Chassy_SC_3561;N1NYX8;Q03124; Chromatin structure-remodeling complex subunit RSC9 - RSC9	0	0	0	2	0	1	0	0	0	0	0	2	0	0	0	0	0	0	1	0	0
d1703	d1703.a1	d1703.a1.a1	Chassy_SC_356;N1NYL4;CENPK|reversed specific;No description in SC288c, annotation and gene name in CENPK: Uls1p -CENPK1137D_2209	0	0	0	2	0	0	0	0	1	0	0	0	0	0	0	0	0	0	0	0	0
c483	c483.a1	c483.a1.a1	Chassy_SC_3557;N1NZ49;P32368; Phosphoinositide phosphatase SAC1 - SAC1	4	7	9	4	7	16	3	4	5	6	6	13	3	3	7	7	13	10	8	2	2
d1137	d1137.a1	d1137.a1.a1	Chassy_SC_3555;N1P302;P43619; Nicotinate-nucleotide pyrophosphorylase [carboxylating] - BNA6	1	1	1	0	1	2	0	2	1	0	1	2	0	0	1	1	1	2	2	1	1
d1735	d1735.a1	d1735.a1.a1	Chassy_SC_3553;N1P4L3;Q12156; Protein AIM7 - AIM7	0	0	0	0	0	0	0	1	0	0	1	0	0	0	0	0	1	0	0	0	0
c320	c320.a1	c320.a1.a1	Chassy_SC_3550;N1NZ88;Q04869; Uncharacterized protein YMR315W - YMR315W	7	13	11	13	14	6	6	15	17	13	16	8	6	5	11	17	14	6	16	6	9
c476	c476.a1	c476.a1.a1	Chassy_SC_3548;N1P937;P22336; Replication factor A protein 1 - RFA1	4	7	6	6	9	10	2	13	10	9	13	5	4	1	4	11	10	5	12	0	1
d1493	d1493.a1	d1493.a1.a1	Chassy_SC_3546;N1P5Q8;Q03362; Uncharacterized protein YDR476C - YDR476C	0	0	0	4	0	0	0	0	1	1	0	0	0	0	0	0	1	0	1	0	0
d1845	d1845.a1	d1845.a1.a1	Chassy_SC_3544;N1P0Q7;P29703; Protein farnesyltransferase/geranylgeranyltransferase type-1 subunit alpha - RAM2	0	0	0	0	0	1	0	0	0	0	0	0	0	0	0	0	0	1	0	0	0
c360	c360.a1	c360.a1.a1	Chassy_SC_3542;N1NZI3;P36046; Mitochondrial intermembrane space import and assembly protein 40 - MIA40	6	9	14	12	12	13	4	8	12	10	11	13	4	3	11	9	15	12	12	5	3
c308	c308.a1	c308.a1.a1	Chassy_SC_3541;N1NYC6;P18544; Acetylornithine aminotransferase, mitochondrial - ARG8	8	16	9	9	17	5	7	14	16	14	17	9	7	7	12	18	19	6	15	5	6
d1881	d1881.a1	d1881.a1.a1	Chassy_SC_3536;N1P8B8;P38181; Nucleoporin NUP170 - NUP170	0	0	0	0	0	0	0	0	1	0	0	1	0	0	0	0	0	0	0	0	0
d1174	d1174.a1	d1174.a1.a1	Chassy_SC_3534;N1NX24;Q12125; Golgi to ER traffic protein 4 - GET4	0	1	1	2	2	2	0	1	2	0	1	1	0	0	1	2	1	1	1	0	0
c340	c340.a1	c340.a1.a1	Chassy_SC_3531;N1P5K0;P04449; 60S ribosomal protein L24-A - RPL24A	6	12	12	11	16	8	4	11	9	10	12	12	5	3	9	12	14	6	12	3	3
d1043	d1043.a1	d1043.a1.a1	Chassy_SC_3530;N1P2G1;P36101; tRNA threonylcarbamoyladenosine dehydratase 2 - TCD2	0	1	2	3	2	2	0	1	1	3	2	2	0	0	2	1	2	1	2	0	0
d1691	d1691.a1	d1691.a1.a1	Chassy_SC_3524;N1NZG8;P69771; Vacuolar protein-sorting-associated protein 46 - DID2	0	0	0	1	1	1	0	0	0	0	0	0	0	0	0	0	0	0	1	0	0
c218	c218.a1	c218.a1.a1	Chassy_SC_3523;N1P2Y2;P36060; NADH-cytochrome b5 reductase 2 - MCR1	8	15	13	27	20	13	10	14	11	31	21	11	9	7	10	18	22	9	41	7	7
c157	c157.a1	c157.a1.a1	Chassy_SC_3522;N1NW10;P07263; Histidine--tRNA ligase, mitochondrial - HTS1	9	15	9	13	11	17	10	16	10	13	12	15	7	9	12	12	14	12	17	6	7
d1224	d1224.a1	d1224.a1.a1	Chassy_SC_352;N1NZW3;P08465; Homoserine O-acetyltransferase - MET2	0	4	3	0	0	1	0	1	2	0	1	0	0	0	1	0	2	0	1	0	0
c790	c790.a1	c790.a1.a1	Chassy_SC_3519;N1NW32;P20424; Signal recognition particle subunit SRP54 - SRP54	0	3	2	4	3	6	1	3	4	5	4	3	0	0	2	3	4	2	5	0	0
d1357	d1357.a1	d1357.a1.a1	Chassy_SC_3516;N1PAR4;P38074; Protein arginine N-methyltransferase 1 - HMT1	0	0	0	2	2	1	0	0	0	0	0	2	0	0	0	2	0	1	1	0	0
c973	c973.a1	c973.a1.a1	Chassy_SC_3514;N1P8R7;P47122; GPN-loop GTPase 1 - NPA3	0	3	3	2	2	1	0	3	4	2	2	2	0	0	3	2	3	0	2	0	0
b26	b26.a1	b26.a1.a1	Chassy_SC_3513;N1P7U8;P14540; Fructose-bisphosphate aldolase - FBA1	34	57	48	85	79	60	32	65	59	77	73	66	34	32	46	67	82	51	91	31	25
c788	c788.a1	c788.a1.a1	Chassy_SC_351;N1P8M8;P22696; Peptidyl-prolyl cis-trans isomerase ESS1 - ESS1	1	4	4	3	4	3	1	1	3	3	3	4	0	1	5	2	3	4	4	0	1
d1362	d1362.a1	d1362.a1.a1	Chassy_SC_3509;N1P6F0;Q02199; Nucleoporin NUP49/NSP49 - NUP49	0	0	1	0	1	0	0	1	1	1	0	1	0	0	2	1	2	0	0	0	0
d1418	d1418.a1	d1418.a1.a1	Chassy_SC_3506;N1NWV1;P12611; Growth regulation protein - WHI2	0	0	1	0	2	0	0	0	0	0	0	1	0	0	2	1	2	0	0	0	0
d1264	d1264.a1	d1264.a1.a1	Chassy_SC_3505;N1P4C6;Q12100; Probable serine/threonine-protein kinase RTK1 - RTK1	0	1	1	2	0	0	0	0	1	1	1	1	0	0	0	1	2	0	3	0	0
b94	b94.a2	b94.a2.a1	Chassy_SC_3504;N1P369;P47052; Succinate dehydrogenase [ubiquinone] flavoprotein subunit 2, mitochondrial - YJL045W	4	5	11	8	9	5	3	9	14	8	10	6	3	3	11	6	10	5	8	3	3
c667	c667.a1	c667.a1.a1	Chassy_SC_3503;N1P1H8;P41903; Peroxisomal acyl-coenzyme A thioester hydrolase 1 - TES1	2	5	6	7	8	1	2	2	5	5	5	1	3	1	3	5	5	1	6	3	3
d1793	d1793.a1	d1793.a1.a1	Chassy_SC_3502;N1P153;P38825; Protein TOM71 - TOM71	0	0	0	0	1	0	0	0	0	0	1	0	0	0	0	0	0	0	0	0	0
d2043	d2043.a1	d2043.a1.a1	Chassy_SC_350;N1NZS1;P39677; Ribosome-releasing factor 2, mitochondrial - MEF2	0	0	1	0	0	0	0	0	0	0	0	0	0	0	0	0	0	0	0	0	0
d2028	d2028.a1	d2028.a1.a1	Chassy_SC_35;N1P0J3;P36149; Trafficking protein particle complex subunit BET3 - BET3	0	0	0	0	0	0	0	0	0	0	0	0	0	0	0	0	1	0	0	0	0
c361	c361.a1	c361.a1.a1	Chassy_SC_3499;N1P6X8;Q02753; 60S ribosomal protein L21-A - RPL21A	7	8	10	8	10	9	7	11	11	11	12	9	8	6	9	11	13	6	8	8	8
c685	c685.a1	c685.a1.a1	Chassy_SC_3498;N1P7X5;P32356; Neutral trehalase - NTH1	1	5	9	4	4	1	2	4	7	3	4	1	1	2	7	7	3	0	6	1	2
d1033	d1033.a1	d1033.a1.a1	Chassy_SC_3496;N1NVG5;Q02933; Ribonuclease T2-like - RNY1	0	1	4	0	5	0	0	2	3	0	5	0	0	0	3	2	3	0	0	0	0
c685	c685.a2	c685.a2.a1	Chassy_SC_3493;N1P9B5;P35172; Probable trehalase - NTH2	1	1	2	1	1	1	1	1	1	1	1	1	1	2	1	1	1	0	1	1	2
c901	c901.a1	c901.a1.a1	Chassy_SC_349;N1P3N5;P47154; CAAX prenyl protease 1 - STE24	0	2	3	2	1	0	3	2	4	3	2	1	1	1	3	3	4	1	2	2	1
c247	c247.a1	c247.a1.a1	Chassy_SC_3483;N1P450;Q07478; ATP-dependent RNA helicase SUB2 - SUB2	8	16	15	18	18	15	8	17	17	18	16	18	6	5	14	19	23	7	19	5	5
c168	c168.a1	c168.a1.a1	Chassy_SC_348;N1P779;Q05506; Arginine--tRNA ligase, cytoplasmic - YDR341C	14	19	19	23	21	19	9	25	24	23	20	20	9	12	18	19	21	14	25	10	12
d1795	d1795.a1	d1795.a1.a1	Chassy_SC_3479;N1NWC1;P19659; Mediator of RNA polymerase II transcription subunit 15 - GAL11	0	0	1	0	0	0	0	0	1	0	0	0	0	0	0	0	0	0	0	0	0
c876	c876.a1	c876.a1.a1	Chassy_SC_3478;N1P673;P53315; 6-phosphogluconolactonase 4 - SOL4	1	4	6	1	5	0	0	3	4	1	4	0	1	0	5	5	3	0	1	0	0
d1572	d1572.a1	d1572.a1.a1	Chassy_SC_3477;N1P453;P48240; Exosome complex component MTR3 - MTR3	0	1	1	1	0	1	0	0	0	0	1	0	0	0	0	0	1	0	0	0	0
d1008	d1008.a1	d1008.a1.a1	Chassy_SC_3474;N1P1R1;P40319; Elongation of fatty acids protein 3 - ELO3	1	1	1	1	1	1	2	1	2	1	2	4	1	1	1	2	2	1	2	1	1
d2056	d2056.a1	d2056.a1.a1	Chassy_SC_3473;N1P022;P39538; Ubiquitin carboxyl-terminal hydrolase 12 - UBP12	0	0	0	1	0	0	0	0	0	0	0	0	0	0	0	0	0	0	0	0	0
d1035	d1035.a1	d1035.a1.a1	Chassy_SC_3467;N1P8H6;P38323; ATP-dependent clpX-like chaperone, mitochondrial - MCX1	0	3	3	0	2	3	0	3	2	0	4	1	0	0	2	2	2	0	1	0	0
c868	c868.a1	c868.a1.a1	Chassy_SC_3460;N1P7B1;Q06405; ATP synthase subunit f, mitochondrial - ATP17	1	2	3	4	3	3	0	2	4	3	2	1	1	2	0	3	4	0	5	0	1
d1659	d1659.a1	d1659.a1.a1	Chassy_SC_346;N1NZD5;P53924; E3 ubiquitin-protein ligase DMA2 - DMA2	0	0	2	0	0	0	0	0	1	0	0	0	0	0	0	0	1	0	0	0	0
d2009	d2009.a1	d2009.a1.a1	Chassy_SC_3458;N1P0L3;Q02455; Protein MLP1 - MLP1	0	0	0	0	0	0	0	0	0	0	1	0	0	0	0	0	0	0	0	0	0
d1887	d1887.a1	d1887.a1.a1	Chassy_SC_345;N1PAH6;Q06651; E3 ubiquitin-protein ligase PIB1 - PIB1	0	0	0	0	0	0	0	0	1	0	0	0	0	0	0	0	0	0	0	0	0
b72	b72.a1	b72.a1.a1	Chassy_SC_3449;N1NW84;P40825; Alanine--tRNA ligase, mitochondrial - ALA1	22	35	32	37	33	31	26	37	30	37	36	30	22	21	29	36	34	31	38	24	21
d1353	d1353.a1	d1353.a1.a1	Chassy_SC_3447;N1NYJ9;P39103; Cytochrome c oxidase assembly protein COX14 - COX14	0	0	2	1	3	0	0	1	0	0	0	1	0	0	1	2	0	0	0	0	0
b15	b15.a1	b15.a1.a1	Chassy_SC_3446;N1P7N2;Q01574; Acetyl-coenzyme A synthetase 1 - ACS1	38	58	71	49	53	18	40	61	70	54	59	16	35	34	69	56	80	12	57	37	31
d1722	d1722.a1	d1722.a1.a1	Chassy_SC_3445;N1P3W9;P53073; ER membrane protein complex subunit 4 - EMC4	0	0	0	0	0	0	0	0	0	0	0	0	0	0	0	1	2	0	0	0	0
d1355	d1355.a1	d1355.a1.a1	Chassy_SC_3444;N1P0G1;P47006; DNA-directed RNA polymerase I subunit RPA34 - RPA34	0	2	1	0	0	2	0	0	0	2	0	2	0	0	1	0	0	0	1	0	0
b47	b47.a1	b47.a1.a1	Chassy_SC_3439;N1PA17;P60010; Actin - ACT1	26	47	54	52	50	44	24	46	55	40	44	50	21	20	40	48	60	34	53	19	19
d1517	d1517.a1	d1517.a1.a1	Chassy_SC_3438;N1P689;P25618; Protein CWH43 - CWH43	0	1	1	0	0	1	0	0	0	0	0	2	0	0	1	0	0	1	0	0	0
d1425	d1425.a1	d1425.a1.a1	Chassy_SC_3429;N1NYP0;P38993; Iron transport multicopper oxidase FET3 - FET3	0	0	0	2	1	0	1	0	0	2	0	0	0	0	0	1	1	0	1	0	0
d1504	d1504.a1	d1504.a1.a1	Chassy_SC_3428;N1NXH9;Q12038; Lethal(2) giant larvae protein homolog SRO7 - SRO7	0	0	1	1	1	0	0	0	1	1	0	1	0	0	0	0	1	0	1	0	0
c512	c512.a1	c512.a1.a1	Chassy_SC_3427;N1P7V2;P35691; Translationally-controlled tumor protein homolog - TMA19	4	5	6	8	6	5	6	7	7	8	7	7	5	5	5	7	8	3	8	5	5
d1783	d1783.a1	d1783.a1.a1	Chassy_SC_3425;N1NZE1;P32500; Nucleoporin NDC1 - NDC1	0	0	1	0	0	1	0	0	0	0	0	0	0	0	0	0	0	0	0	0	0
d1747	d1747.a1	d1747.a1.a1	Chassy_SC_3421;N1PAN9;P25576; Nicotinamide mononucleotide adenylyltransferase - POF1	0	0	0	1	0	0	0	0	0	0	0	0	0	0	0	0	0	0	2	0	0
d1028	d1028.a1	d1028.a1.a1	Chassy_SC_3420;N1P7T0;Q04430; Pantothenate kinase CAB1 - CAB1	0	2	2	2	2	2	0	2	2	2	2	2	0	0	1	2	3	0	2	0	0
d1291	d1291.a1	d1291.a1.a1	Chassy_SC_3419;N1P8W4;P10962; Protein MAK16 - MAK16	0	0	0	0	2	1	0	1	0	2	1	1	0	0	1	1	1	0	2	0	0
c720	c720.a1	c720.a1.a1	Chassy_SC_3417;N1P3Y7;P42938; Probable ATP-dependent kinase TDA10 - TDA10	0	4	5	7	6	1	0	7	4	5	6	3	0	0	4	4	6	1	4	0	0
d2085	d2085.a1	d2085.a1.a1	Chassy_SC_3416;N1NVM2;Q06214; WD repeat-containing protein JIP5 - JIP5	0	0	0	0	0	0	0	0	0	0	0	1	0	0	0	0	0	0	0	0	0
d1017	d1017.a1	d1017.a1.a1	Chassy_SC_3413;N1P269;Q12514; General negative regulator of transcription subunit 5 - NOT5	0	0	3	1	3	1	0	3	3	1	2	0	0	0	4	1	4	0	3	0	0
d1655	d1655.a1	d1655.a1.a1	Chassy_SC_3412;N1NWU4;P53732; 37S ribosomal protein S12, mitochondrial - MRPS12	0	0	0	0	1	1	0	0	0	0	0	0	0	0	0	0	1	0	1	0	0
c555	c555.a1	c555.a1.a1	Chassy_SC_3410;N1P6D5;P04037; Cytochrome c oxidase subunit 4, mitochondrial - COX4	5	7	6	5	5	5	4	5	6	7	7	6	2	2	6	6	6	6	10	2	3
d1228	d1228.a1	d1228.a1.a1	Chassy_SC_3407;N1P6K7;CENPK specific;No description in SC288c, annotation and gene name in CENPK: Nhp6bp -CENPK1137D_4637	0	1	1	2	1	1	0	1	1	1	1	1	0	0	1	1	1	1	1	0	0
b54	b54.a1	b54.a1.a1	Chassy_SC_3403;N1P7N3;Q12680; Glutamate synthase [NADH] - GLT1	28	35	33	48	55	44	25	34	26	46	53	46	22	23	29	59	50	28	49	17	19
c257	c257.a1	c257.a1.a1	Chassy_SC_34;N1P3W6;P06103; Eukaryotic translation initiation factor 3 subunit B - PRT1	8	17	14	13	18	16	9	13	14	21	18	15	7	5	14	14	21	7	18	7	5
d1646	d1646.a1	d1646.a1.a1	Chassy_SC_3397;N1NX27;Q12246; Sphingoid long chain base kinase 4 - LCB4	0	0	0	0	0	0	0	0	0	0	0	0	0	0	2	0	1	0	1	0	0
d1911	d1911.a1	d1911.a1.a1	Chassy_SC_3396;N1P343;P53139; Uncharacterized protein YGL108C - YGL108C	0	0	1	0	0	0	0	0	0	0	0	0	0	0	0	0	0	0	0	0	0
c390	c390.a1	c390.a1.a1	Chassy_SC_3393;N1P5C3;P39958; Rab GDP-dissociation inhibitor - GDI1	2	11	11	10	8	12	3	9	13	7	12	11	8	3	10	14	9	7	12	4	3
c279	c279.a1	c279.a1.a1	Chassy_SC_3392;N1P176;P38845; Cruciform DNA-recognizing protein 1 - CRP1	6	16	23	10	17	11	5	19	24	12	15	12	5	4	23	16	15	8	11	2	3
c736	c736.a1	c736.a1.a1	Chassy_SC_3387;N1P4N0;P38922; Protein HRB1 - HRB1	1	5	4	4	5	5	1	2	3	4	4	6	0	0	5	3	4	3	4	0	0
d1898	d1898.a1	d1898.a1.a1	Chassy_SC_3380;N1NZ17;Q08904;|reversed Protein RDR1 - RDR1	0	0	0	1	0	0	0	0	0	0	0	0	0	0	0	0	0	0	0	0	0
c880	c880.a1	c880.a1.a1	Chassy_SC_3377;N1NZ01;P14747; Serine/threonine-protein phosphatase 2B catalytic subunit A2 - CMP2	1	3	6	2	2	2	1	2	4	2	3	1	0	0	4	3	4	1	2	0	0
d1603	d1603.a1	d1603.a1.a1	Chassy_SC_3373;N1P5C9;Q05040; Factor arrest protein 8 - FAR8	0	0	0	0	1	0	0	0	0	0	0	0	0	0	1	1	2	0	0	0	0
d1402	d1402.a1	d1402.a1.a1	Chassy_SC_3371;N1NYZ0;P22203; V-type proton ATPase subunit E - VMA4	0	0	0	3	3	0	0	1	0	0	0	0	0	0	0	2	0	0	1	0	0
d1538	d1538.a1	d1538.a1.a1	Chassy_SC_337;N1P845;P33753; tRNA (uracil(54)-C(5))-methyltransferase - TRM2	0	0	0	0	0	0	0	0	0	2	0	0	0	0	0	0	0	0	5	0	0
c756	c756.a1	c756.a1.a1	Chassy_SC_3362;N1P455;P13517; F-actin-capping protein subunit beta - CAP2	2	3	2	5	4	4	1	5	3	3	4	6	0	1	4	4	2	2	4	0	0
d1590	d1590.a1	d1590.a1.a1	Chassy_SC_3361;N1P1D6;P38892; Probable S-adenosylmethionine-dependent methyltransferase CRG1 - CRG1	0	0	1	0	0	0	0	2	0	0	0	0	0	0	0	1	2	0	0	0	0
c813	c813.a1	c813.a1.a1	Chassy_SC_336;N1P6T8;Q05567; Sphingosine-1-phosphate lyase - DPL1	0	4	8	3	2	0	0	3	8	2	3	0	0	0	7	6	5	0	1	0	0
d1820	d1820.a1	d1820.a1.a1	Chassy_SC_3355;N1P9Z4;P46682; AP-3 complex subunit beta - APL6	0	0	0	0	0	0	0	0	0	0	0	0	0	0	0	1	1	0	0	0	0
d1982	d1982.a1	d1982.a1.a1	Chassy_SC_3352;N1P1M9;P40530; [Pyruvate dehydrogenase (acetyl-transferring)] kinase 1, mitochondrial - PKP1	0	0	0	0	0	0	0	0	0	0	0	0	0	0	0	0	1	0	0	0	0
c890	c890.a1	c890.a1.a1	Chassy_SC_3349;N1P9Y0;P16451; Pyruvate dehydrogenase complex protein X component, mitochondrial - PDX1	0	4	2	3	2	2	0	1	3	1	5	5	0	0	2	2	3	2	5	0	0
d1296	d1296.a1	d1296.a1.a1	Chassy_SC_3348;N1P212;P48016; Vacuolar acid trehalase - ATH1	0	0	3	2	1	0	0	0	2	1	0	0	0	0	3	0	1	0	0	0	0
c620	c620.a1	c620.a1.a1	Chassy_SC_3343;N1P146;P38817; ADP-ribosylation factor-binding protein GGA2 - GGA2	1	5	6	4	5	2	1	5	3	6	6	6	2	2	7	7	10	2	8	1	1
c677	c677.a2	c677.a2.a1	Chassy_SC_3340;N1PAR8;P38079; Protein YRO2 - YRO2	3	2	3	5	1	0	3	1	2	3	3	0	2	2	2	3	3	0	3	2	4
c197	c197.a1	c197.a1.a1	Chassy_SC_334;N1P679;P33327; NAD-specific glutamate dehydrogenase - GDH2	9	26	31	13	18	10	10	20	32	18	13	12	8	7	18	18	35	7	23	7	6
d1766	d1766.a1	d1766.a1.a1	Chassy_SC_3338;N1P9D1;P38782; Mediator of RNA polymerase II transcription subunit 6 - MED6	0	0	0	0	0	0	0	0	0	0	0	2	0	0	0	0	1	0	0	0	0
c946	c946.a1	c946.a1.a1	Chassy_SC_3336;N1P5T5;Q07381; Ribosome biogenesis protein TSR1 - TSR1	0	2	5	1	1	3	0	2	2	1	1	1	0	0	5	3	6	2	2	0	0
d1358	d1358.a1	d1358.a1.a1	Chassy_SC_3334;N1P427;Q02793; Antiviral protein SKI8 - SKI8	0	1	0	1	0	1	0	0	1	2	0	0	0	0	1	1	2	0	1	0	0
c755	c755.a1	c755.a1.a1	Chassy_SC_3333;N1P200;Q12522; Eukaryotic translation initiation factor 6 - TIF6	2	3	4	3	2	4	2	3	3	4	2	3	2	2	3	3	3	4	3	2	2
d2061	d2061.a1	d2061.a1.a1	Chassy_SC_333;N1P000;P27351; AP-2 complex subunit beta - APL1	0	0	0	0	0	0	0	0	0	0	0	1	0	0	0	0	0	0	0	0	0
b32	b32.a1	b32.a1.a1	Chassy_SC_3329;N1NX34;P07262; NADP-specific glutamate dehydrogenase 1 - GDH1	38	43	35	72	80	34	40	45	38	74	75	35	34	31	37	67	52	26	76	34	34
d1049	d1049.a1	d1049.a1.a1	Chassy_SC_3325;N1P3B6;P38777; Family of serine hydrolases 1 - FSH1	0	1	1	4	1	1	0	1	1	4	1	1	0	0	1	1	1	1	7	0	0
d1823	d1823.a1	d1823.a1.a1	Chassy_SC_3324;N1P181;Q12429;|reversed Diphthine--ammonia ligase - DPH6	0	0	0	0	0	0	0	0	0	0	0	0	0	1	0	0	0	0	0	0	1
d2070	d2070.a1	d2070.a1.a1	Chassy_SC_3323;N1NX11;P53867; Cysteine protease ATG4 - ATG4	0	0	1	0	0	0	0	0	0	0	0	0	0	0	0	0	0	0	0	0	0
d1627	d1627.a1	d1627.a1.a1	Chassy_SC_3322;N1P0N2;P36091; Mannan endo-1,6-alpha-mannosidase DCW1 - DCW1	0	0	1	0	1	1	0	0	1	0	0	1	0	0	0	0	0	0	0	0	0
d1948	d1948.a1	d1948.a1.a1	Chassy_SC_3320;N1NXU9;P21306; ATP synthase subunit epsilon, mitochondrial - ATP15	0	0	0	0	1	0	0	0	0	0	0	0	0	0	0	0	0	0	0	0	0
d2083	d2083.a1	d2083.a1.a1	Chassy_SC_3314;N1P5H2;P53163; 54S ribosomal protein L12, mitochondrial - MNP1	0	0	0	0	0	0	0	0	0	0	0	1	0	0	0	0	0	0	0	0	0
c367	c367.a1	c367.a1.a1	Chassy_SC_3312;N1P8D2;Q03940; RuvB-like protein 1 - RVB1	4	13	8	14	12	10	4	15	15	11	11	10	3	3	9	9	16	7	12	2	6
c364	c364.a1	c364.a1.a1	Chassy_SC_3307;N1NZT9;Q04491; Protein transport protein SEC13 - SEC13	6	13	10	10	12	10	6	11	12	14	13	9	4	4	9	11	13	5	14	4	6
c926	c926.a1	c926.a1.a1	Chassy_SC_3304;N1P986;P25369; LAS seventeen-binding protein 5 - LSB5	0	2	2	4	5	2	0	3	3	2	3	2	0	0	1	3	4	0	3	0	0
d1301	d1301.a1	d1301.a1.a1	Chassy_SC_3303;N1P008;P53860; Phosphatidylinositol transfer protein PDR16 - PDR16	0	0	2	0	1	0	0	2	1	0	0	0	0	0	2	0	2	0	3	0	0
d1048	d1048.a1	d1048.a1.a1	Chassy_SC_3300;N1NZJ1;P36150; Uroporphyrinogen-III C-methyltransferase - MET1	0	1	1	4	3	0	0	2	2	1	2	1	0	0	0	3	2	0	5	0	0
d1241	d1241.a1	d1241.a1.a1	Chassy_SC_33;N1P020;Q07938; S-methyl-5'-thioadenosine phosphorylase - MEU1	1	1	1	1	1	1	1	1	0	1	1	2	0	1	0	1	1	0	1	0	0
d1261	d1261.a1	d1261.a1.a1	Chassy_SC_3299;N1P9F2;P38822; Protein BZZ1 - BZZ1	0	1	1	2	1	1	0	0	1	1	1	1	0	0	1	1	1	1	1	0	0
c100	c100.a1	c100.a1.a1	Chassy_SC_3296;N1P3M2;P07806; Valine--tRNA ligase, mitochondrial - VAS1	17	31	34	24	24	33	18	28	29	32	26	31	17	15	26	32	31	23	32	15	12
c156	c156.a1	c156.a1.a1	Chassy_SC_3294;N1P0A2;P26783; 40S ribosomal protein S5 - RPS5	12	20	22	25	24	20	11	22	18	25	25	20	15	12	17	21	24	14	23	12	10
d1632	d1632.a1	d1632.a1.a1	Chassy_SC_329;N1P7L4;P04819-2; Isoform Nuclear of DNA ligase 1 - CDC9	0	0	1	1	0	0	0	1	0	0	0	1	0	0	0	0	0	0	1	0	0
c252	c252.a2	c252.a2.a1	Chassy_SC_3289;N1P2M6;CENPK specific;No description in SC288c, annotation and gene name in CENPK: Rpl7bp -CENPK1137D_1927	12	11	16	16	22	8	11	14	13	16	17	11	7	7	14	13	11	7	15	8	9
c410	c410.a1	c410.a1.a1	Chassy_SC_3287;N1P6L4;P02557; Tubulin beta chain - TUB2	4	9	9	10	11	10	3	11	11	9	10	9	4	4	10	11	12	7	9	4	3
c101	c101.a1	c101.a1.a1	Chassy_SC_3286;N1PAT2;P38088; Glycine--tRNA ligase 1, mitochondrial - GRS1	20	25	24	30	29	33	22	22	26	27	27	34	19	16	27	30	28	24	32	17	14
c291	c291.a1	c291.a1.a1	Chassy_SC_3285;N1NZT4;P05150; Ornithine carbamoyltransferase - ARG3	7	13	11	11	15	14	10	17	19	11	17	11	4	6	11	16	17	8	10	8	10
c780	c780.a1	c780.a1.a1	Chassy_SC_3284;N1NXT9;P50101; Ubiquitin carboxyl-terminal hydrolase 15 - UBP15	1	0	6	8	3	1	1	2	6	7	1	1	0	0	4	4	4	0	7	0	1
d2029	d2029.a1	d2029.a1.a1	Chassy_SC_3283;N1P7S0;P36076; Coenzyme A biosynthesis protein 3 - CAB3	0	0	0	0	0	0	0	0	1	0	0	0	0	0	0	0	0	0	0	0	0
d1081	d1081.a1	d1081.a1.a1	Chassy_SC_3282;N1P5G1;Q04767; Golgi apparatus membrane protein TVP18 - TVP18	1	1	2	1	1	3	1	1	2	1	1	2	1	1	1	1	1	0	1	0	1
d1975	d1975.a1	d1975.a1.a1	Chassy_SC_3281;N1NZZ2;P08678; Adenylate cyclase - CYR1	0	0	0	0	0	0	0	0	0	0	0	0	0	0	1	0	0	0	0	0	0
c516	c516.a1	c516.a1.a1	Chassy_SC_3280;N1P0R4;P00729; Carboxypeptidase Y - PRC1	4	9	6	5	8	4	5	8	6	6	8	9	4	6	4	7	11	2	8	4	2
c837	c837.a1	c837.a1.a1	Chassy_SC_3275;N1PAH3;P32264; Glutamate 5-kinase - PRO1	0	2	3	3	5	3	0	3	4	2	3	6	0	0	3	2	4	2	3	0	0
c709	c709.a1	c709.a1.a1	Chassy_SC_3273;N1P1I3;P47096; 3-hydroxyanthranilate 3,4-dioxygenase - BNA1	1	7	5	3	4	2	1	6	6	1	9	3	0	1	5	4	9	2	1	0	0
c557	c557.a1	c557.a1.a1	Chassy_SC_327;N1P962;P25375; Saccharolysin - PRD1	2	7	6	11	8	5	1	6	5	9	8	8	1	1	2	5	8	4	12	1	1
d1625	d1625.a1	d1625.a1.a1	Chassy_SC_3268;N1NY78;P23642; Mannan polymerase I complex VAN1 subunit - VAN1	0	1	0	0	1	1	0	0	0	0	0	1	0	0	0	0	1	0	0	0	0
d1616	d1616.a1	d1616.a1.a1	Chassy_SC_3267;N1P2P6;P38756; tRNA threonylcarbamoyladenosine dehydratase 1 - TCD1	0	0	0	0	0	1	0	0	1	0	0	1	0	0	1	0	0	0	1	0	0
c971	c971.a1	c971.a1.a1	Chassy_SC_3263;N1P617;P41895; Transcription initiation factor IIF subunit alpha - TFG1	0	0	5	3	1	2	0	0	4	0	3	1	0	0	4	1	6	0	4	0	0
c429	c429.a1	c429.a1.a1	Chassy_SC_326;N1NWS2;P39683; Nicotinate phosphoribosyltransferase - NPT1	3	5	11	11	14	9	1	14	8	9	10	8	1	3	9	12	12	3	14	3	2
c619	c619.a1	c619.a1.a1	Chassy_SC_3259;N1P3N8;P40893; Regulation of enolase protein 1 - REE1	2	5	7	7	7	1	1	6	5	5	8	2	3	1	7	5	7	1	6	2	2
d1104	d1104.a1	d1104.a1.a1	Chassy_SC_3255;N1NZE0;P53927; Ribosome biogenesis protein 15 - NOP15	0	2	1	0	2	2	0	3	0	0	2	2	0	0	1	2	2	2	2	0	0
b23	b23.a1	b23.a1.a1	Chassy_SC_3254;N1NX93;P54115; Magnesium-activated aldehyde dehydrogenase, cytosolic - ALD6	43	58	56	101	69	54	43	60	63	117	70	51	52	47	49	65	70	44	119	43	39
c241	c241.a1	c241.a1.a1	Chassy_SC_325;N1P0V5;P36112; MICOS complex subunit MIC60 - MIC60	7	16	20	19	19	14	11	17	17	19	19	14	9	3	15	18	18	8	22	6	2
c145	c145.a1	c145.a1.a1	Chassy_SC_3249;N1P809;P21576; Vacuolar protein sorting-associated protein 1 - VPS1	13	26	24	22	25	24	14	20	20	20	24	19	15	11	22	22	26	18	25	10	12
d1656	d1656.a1	d1656.a1.a1	Chassy_SC_3248;N1NVJ8;Q12199; Type 2A phosphatase activator TIP41 - TIP41	0	0	0	1	0	0	0	1	0	1	0	0	0	0	1	0	0	0	0	0	0
d2089	d2089.a1	d2089.a1.a1	Chassy_SC_3245;N1P7G2;P28791; Protein transport protein SEC20 - SEC20	0	0	0	0	0	0	0	0	0	0	0	1	0	0	0	0	0	0	0	0	0
d1587	d1587.a1	d1587.a1.a1	Chassy_SC_3244;N1P1Q9;P40557; ER-retained PMA1-suppressing protein 1 - EPS1	0	0	1	0	0	0	0	0	0	0	1	1	0	0	0	2	1	0	0	0	0
d1381	d1381.a1	d1381.a1.a1	Chassy_SC_3240;N1P062;P47133; ER membrane protein complex subunit 2 - EMC2	0	1	1	1	0	1	0	0	0	1	0	1	0	0	1	2	2	0	0	0	0
c442	c442.a1	c442.a1.a1	Chassy_SC_324;N1P6L0;P12612; T-complex protein 1 subunit alpha - TCP1	1	12	7	11	9	11	2	11	11	11	7	7	1	1	11	8	12	7	11	3	1
d1424	d1424.a1	d1424.a1.a1	Chassy_SC_3239;N1P795;P38153; AP-3 complex subunit mu - APM3	0	0	1	0	0	0	0	2	1	0	0	1	0	0	0	0	4	0	0	0	0
b91	b91.a2	b91.a2.a1	Chassy_SC_3237;N1P997;P08679; Citrate synthase, peroxisomal - CIT2	0	1	4	20	12	7	0	3	7	12	3	12	0	0	4	7	3	4	15	0	0
d1804	d1804.a1	d1804.a1.a1	Chassy_SC_3235;N1P0A9;P46982; Alpha-1,2-mannosyltransferase MNN5 - MNN5	0	1	0	0	0	0	0	0	0	0	0	1	0	0	0	0	0	0	0	0	0
d1050	d1050.a1	d1050.a1.a1	Chassy_SC_3229;N1NVY1;Q99369; Family of serine hydrolases 3 - FSH3	0	3	2	2	3	1	0	2	2	1	2	1	0	0	1	2	1	0	3	0	0
d1416	d1416.a1	d1416.a1.a1	Chassy_SC_3228;N1NVK7;O13585; Dilute domain-containing protein YPR089W - YPR089W	0	0	2	2	0	0	0	0	1	1	0	1	0	0	1	0	1	0	1	0	0
d1056	d1056.a1	d1056.a1.a1	Chassy_SC_3226;N1P214;P53200; Protein-lysine N-methyltransferase EFM5 - EFM5	0	2	1	2	4	0	0	3	1	1	2	0	0	0	1	2	3	0	4	0	0
d1852	d1852.a1	d1852.a1.a1	Chassy_SC_3225;N1P048;P40959; Sorting nexin MVP1 - MVP1	0	0	0	0	0	1	0	0	0	0	0	1	0	0	0	0	0	0	0	0	0
c849	c849.a1	c849.a1.a1	Chassy_SC_3223;N1NWZ9;Q99257; mRNA export factor MEX67 - MEX67	0	2	4	5	3	4	0	3	4	1	2	4	0	0	4	2	4	2	3	0	0
c773	c773.a1	c773.a1.a1	Chassy_SC_3222;N1PA14;P32496; 26S proteasome regulatory subunit RPN12 - RPN12	0	3	3	6	3	3	0	5	4	4	4	2	0	0	3	5	5	0	8	0	0
d1207	d1207.a1	d1207.a1.a1	Chassy_SC_3217;N1P2S8;Q08202; Protein OPI10 - OPI10	0	1	1	2	1	0	0	1	2	1	2	0	0	0	1	2	2	0	1	0	0
d1893	d1893.a1	d1893.a1.a1	Chassy_SC_3216;N1NZ26;Q08245; Protein ZEO1 - ZEO1	0	1	0	0	0	0	0	0	0	0	0	0	0	0	0	0	0	0	0	0	0
c669	c669.a1	c669.a1.a1	Chassy_SC_3214;N1P5Y1;P38912; Eukaryotic translation initiation factor 1A - TIF11	2	6	6	7	5	3	1	4	6	5	5	5	1	0	4	4	6	1	5	1	1
d1443	d1443.a1	d1443.a1.a1	Chassy_SC_3212;N1P2A4;P38833; Uncharacterized protein YHR127W - YHR127W	0	0	2	0	2	0	0	1	0	0	1	0	0	0	0	0	2	0	1	0	0
d1526	d1526.a1	d1526.a1.a1	Chassy_SC_321;N1NVP6;P05319; 60S acidic ribosomal protein P2-alpha - RPP2A	0	0	0	1	2	0	0	1	0	0	1	1	0	0	0	0	0	0	1	0	0
c432	c432.a1	c432.a1.a1	Chassy_SC_3208;N1NVJ9;CENPK specific;No description in SC288c, annotation and gene name in CENPK: Rpl43ap -CENPK1137D_1746	8	7	9	7	11	8	8	7	7	7	9	7	9	8	10	8	9	4	8	4	6
c567	c567.a1	c567.a1.a1	Chassy_SC_3207;N1P843;P15873; Proliferating cell nuclear antigen - POL30	1	5	8	9	8	8	1	6	8	6	9	7	0	0	8	7	8	3	5	0	1
c717	c717.a1	c717.a1.a1	Chassy_SC_3206;N1P9Y3;P42940; Probable electron transfer flavoprotein subunit beta - CIR1	0	4	3	6	4	7	0	5	3	4	5	5	0	1	2	5	5	5	4	0	0
d1084	d1084.a1	d1084.a1.a1	Chassy_SC_3199;N1NWY1;P27810; Alpha-1,2 mannosyltransferase KTR1 - KTR1	1	3	1	1	1	3	0	2	1	1	1	2	0	1	1	1	1	1	1	1	0
d1926	d1926.a1	d1926.a1.a1	Chassy_SC_3195;N1PAS9;P38266; Altered inheritance of mitochondria protein 3 - AIM3	0	0	1	0	0	0	0	0	0	0	0	0	0	0	0	0	0	0	0	0	0
d2072	d2072.a1	d2072.a1.a1	Chassy_SC_3194;N1P9B8;P40499; Protein ICE2 - ICE2	0	0	1	0	0	0	0	0	0	0	0	0	0	0	0	0	0	0	0	0	0
b77	b77.a1	b77.a1.a1	Chassy_SC_3193;N1P7B4;P39976; D-2-hydroxyglutarate--pyruvate transhydrogenase DLD3 - DLD3	16	16	16	20	16	57	13	17	17	30	18	61	16	13	11	15	17	46	27	10	13
c885	c885.a1	c885.a1.a1	Chassy_SC_3192;N1P542;P40087; DNA damage-inducible protein 1 - DDI1	0	3	3	2	3	2	0	4	2	3	3	2	1	0	3	3	3	2	4	0	0
d1047	d1047.a1	d1047.a1.a1	Chassy_SC_3191;N1NVS8;P38439; RNA polymerase-associated protein LEO1 - LEO1	0	1	2	2	2	2	0	1	2	1	3	2	0	0	2	2	2	2	1	0	0
b98	b98.a1	b98.a1.a1	Chassy_SC_3184;N1NXW6;P07257; Cytochrome b-c1 complex subunit 2, mitochondrial - QCR2	23	27	24	33	31	26	18	32	27	33	26	24	20	15	25	28	29	25	37	16	19
c430	c430.a1	c430.a1.a1	Chassy_SC_3183;N1P9H9;P23180; Probable oxidoreductase AIM17 - AIM17	6	9	9	7	9	9	5	11	7	10	11	6	5	4	10	8	11	7	8	3	7
c939	c939.a1	c939.a1.a1	Chassy_SC_318;N1P9U7;P53221; 60S ribosomal protein L26-B - RPL26B	1	3	4	1	6	2	0	3	2	1	5	0	0	0	3	1	2	0	3	0	0
c493	c493.a1	c493.a1.a1	Chassy_SC_3178;N1P5I9;Q03161; Glucose-6-phosphate 1-epimerase - YMR099C	3	8	9	10	12	2	2	11	12	8	11	3	1	2	10	11	12	1	7	0	0
c770	c770.a1	c770.a1.a1	Chassy_SC_3177;N1NVJ2;CENPK specific;No description in SC288c, annotation and gene name in CENPK: Rpa135p -CENPK1137D_1711	0	2	3	3	5	3	0	3	4	5	3	4	0	1	3	5	7	1	6	0	0
c465	c465.a1	c465.a1.a1	Chassy_SC_3175;N1P1A0;P14306; Carboxypeptidase Y inhibitor - TFS1	1	10	13	8	15	1	1	10	12	6	15	3	2	2	10	14	11	2	6	3	1
c314	c314.a1	c314.a1.a1	Chassy_SC_3174;N1PA45;P09232; Cerevisin - PRB1	6	14	11	12	18	10	5	14	12	10	19	9	5	4	10	15	22	8	16	5	7
d1876	d1876.a1	d1876.a1.a1	Chassy_SC_3173;N1P242;P38793; tRNA (guanine(37)-N1)-methyltransferase - TRM5	0	0	0	0	0	0	0	0	0	1	0	0	0	0	0	0	0	0	1	0	0
d1785	d1785.a1	d1785.a1.a1	Chassy_SC_3172;N1P105;P36165; Lipase 4 - TGL4	0	0	0	2	0	0	0	0	0	0	0	0	0	0	0	0	0	0	0	0	0
d1195	d1195.a1	d1195.a1.a1	Chassy_SC_3170;N1NWU0;P37254; Aminodeoxychorismate synthase - ABZ1	0	2	2	1	0	1	0	1	1	1	1	1	0	0	3	1	1	0	2	0	0
d1916	d1916.a1	d1916.a1.a1	Chassy_SC_3167;N1NY52;P40344; Autophagy-related protein 3 - ATG3	0	0	0	0	0	1	0	0	0	0	0	0	0	0	0	0	0	0	0	0	0
d1383	d1383.a1	d1383.a1.a1	Chassy_SC_3164;N1P8W9;Q04080; GPI transamidase component GPI17 - GPI17	0	1	2	1	0	1	0	1	1	0	0	1	0	0	1	0	1	0	1	0	0
b70	b70.a1	b70.a1.a1	Chassy_SC_3162;N1P535;P33416; Heat shock protein 78, mitochondrial - HSP78	30	35	45	26	37	23	25	37	41	30	35	24	28	20	40	32	46	22	35	23	22
d1192	d1192.a1	d1192.a1.a1	Chassy_SC_316;N1P323;P08466; Mitochondrial nuclease - NUC1	0	0	3	1	2	3	0	0	1	1	1	1	0	0	1	0	2	1	1	0	0
d1932	d1932.a1	d1932.a1.a1	Chassy_SC_3159;N1P666;Q07655; Protein WHI4 - WHI4	0	0	1	0	0	0	0	0	0	0	0	0	0	0	0	0	0	0	0	0	0
c111	c111.a1	c111.a1.a1	Chassy_SC_3158;N1NXC1;P07342; Acetolactate synthase catalytic subunit, mitochondrial - ILV2	18	29	20	25	25	23	20	24	21	24	35	22	20	18	24	22	31	22	33	20	18
d1728	d1728.a1	d1728.a1.a1	Chassy_SC_3156;N1P288;Q06833; Uncharacterized PH domain-containing protein YPR091C - YPR091C	0	0	0	0	0	0	0	0	1	0	0	0	0	0	1	1	0	0	0	0	0
c888	c888.a1	c888.a1.a1	Chassy_SC_3154;N1P319;P43558; Ubiquitin thioesterase OTU1 - OTU1	0	0	4	5	4	1	1	2	3	5	3	2	0	0	1	1	5	1	5	0	0
c423	c423.a1	c423.a1.a1	Chassy_SC_3153;N1P530;P33338; Protein SLA2 - SLA2	5	12	13	7	5	12	3	7	11	12	8	19	1	3	10	9	15	4	7	2	1
d1819	d1819.a1	d1819.a1.a1	Chassy_SC_3152;N1PA07;P32579; Threonylcarbamoyl-AMP synthase - SUA5	0	0	0	1	0	1	0	0	0	0	0	0	0	0	0	0	0	0	0	0	0
c510	c510.a1	c510.a1.a1	Chassy_SC_3147;N1PAC1;P11353; Oxygen-dependent coproporphyrinogen-III oxidase - HEM13	6	6	6	3	4	18	3	5	3	4	4	21	5	4	2	5	3	14	6	3	4
d1025	d1025.a1	d1025.a1.a1	Chassy_SC_3144;N1P4Q8;Q04599; 54S ribosomal protein L1, mitochondrial - MRPL1	0	1	1	3	1	3	0	2	2	3	2	3	0	0	0	2	1	2	3	0	0
d1635	d1635.a1	d1635.a1.a1	Chassy_SC_3141;N1NXV3;P18408; Phosphoadenosine phosphosulfate reductase - MET16	0	1	0	1	0	0	0	0	0	0	1	1	0	0	0	0	1	0	0	0	0
c692	c692.a1	c692.a1.a1	Chassy_SC_3140;N1PA01;P32803; Endosomal protein P24B - EMP24	3	3	5	3	4	2	2	6	5	4	3	4	2	2	3	4	4	4	4	3	4
d1537	d1537.a1	d1537.a1.a1	Chassy_SC_3136;N1NZK8;P53962; Uncharacterized WD repeat-containing protein YNL035C - YNL035C	0	1	1	0	0	2	0	0	0	0	0	1	0	0	0	0	1	0	1	0	0
d1032	d1032.a1	d1032.a1.a1	Chassy_SC_3134;N1NZF3;P47818; Protein CCC1 - CCC1	0	2	4	2	2	2	0	0	2	3	1	1	0	1	3	1	1	1	2	0	0
c248	c248.a2	c248.a2.a1	Chassy_SC_313;N1P3L9;Q01939; 26S proteasome regulatory subunit 8 homolog - RPT6	4	9	9	10	9	8	4	9	7	9	8	8	4	4	8	10	10	4	7	3	3
d1433	d1433.a1	d1433.a1.a1	Chassy_SC_3125;N1P402;P31334; 54S ribosomal protein L9, mitochondrial - MRPL9	0	0	2	0	3	0	0	0	0	0	1	0	1	0	0	0	0	2	0	0	0
c151	c151.a1	c151.a1.a1	Chassy_SC_3123;N1P3V0;P10964; DNA-directed RNA polymerase I subunit RPA190 - RPA190	4	14	17	11	16	17	2	9	12	11	11	17	2	1	13	19	17	8	15	2	1
d1455	d1455.a1	d1455.a1.a1	Chassy_SC_3121;N1NVG7;Q02961; Putative 2-hydroxyacid dehydrogenase YPL113C - YPL113C	0	1	1	1	1	0	0	1	0	1	0	0	0	0	0	1	1	0	1	0	0
c499	c499.a1	c499.a1.a1	Chassy_SC_312;N1P8W8;P31383; Protein phosphatase PP2A regulatory subunit A - TPD3	6	9	8	10	7	5	4	8	8	9	4	8	1	2	9	7	9	2	11	2	3
c498	c498.a1	c498.a1.a1	Chassy_SC_3119;N1NZJ8;Q10740; Leukotriene A-4 hydrolase homolog - LAP2	2	8	11	12	8	6	2	7	10	10	8	4	3	0	8	9	11	2	11	0	1
c105	c105.a1	c105.a1.a1	Chassy_SC_311;N1NZ54;P17505; Malate dehydrogenase, mitochondrial - MDH1	16	27	24	39	32	20	18	27	29	34	29	23	18	13	25	21	27	14	45	18	15
c385	c385.a1	c385.a1.a1	Chassy_SC_3106;N1NZI4;P40991; 25S rRNA (cytosine(2870)-C(5))-methyltransferase - NOP2	4	10	13	10	9	10	8	8	10	11	14	11	1	5	10	12	14	8	12	1	2
d1763	d1763.a1	d1763.a1.a1	Chassy_SC_3105;N1P589;P25454; DNA repair protein RAD51 - RAD51	0	1	1	0	0	0	0	0	0	0	0	0	0	0	0	0	1	0	0	0	0
c301	c301.a1	c301.a1.a1	Chassy_SC_3103;N1P518;P41810; Coatomer subunit beta - SEC26	8	13	11	18	11	16	6	11	13	13	9	18	6	5	12	17	18	12	13	5	6
d2075	d2075.a1	d2075.a1.a1	Chassy_SC_3102;N1NYS9;P35207; Antiviral helicase SKI2 - SKI2	0	0	0	1	0	0	0	0	0	0	0	0	0	0	0	0	0	0	0	0	0
d1780	d1780.a1	d1780.a1.a1	Chassy_SC_3099;N1P9D0;P38225; Very long-chain fatty acid transport protein - FAT1	0	0	0	0	0	0	0	0	1	0	0	0	0	0	1	0	0	0	0	0	0
c565	c565.a1	c565.a1.a1	Chassy_SC_3096;N1NZ60;Q12265; Ribose-phosphate pyrophosphokinase 5 - PRS5	1	6	8	8	6	5	4	5	7	6	4	6	2	3	5	7	13	2	8	1	1
c809	c809.a1	c809.a1.a1	Chassy_SC_3094;N1PA03;Q00362; Protein phosphatase PP2A regulatory subunit B - CDC55	0	5	2	2	3	0	0	4	4	4	4	2	0	0	4	5	5	2	6	0	0
c428	c428.a1	c428.a1.a1	Chassy_SC_3092;N1P5Q0;P40008; Protein FMP52, mitochondrial - FMP52	3	11	7	11	12	4	4	11	9	9	10	7	3	4	8	13	12	4	15	3	2
d1976	d1976.a1	d1976.a1.a1	Chassy_SC_3091;N1P2W8;P36004; Probable serine/threonine-protein kinase KKQ8 - KKQ8	0	0	1	0	0	0	0	0	0	0	0	0	0	0	0	0	0	0	0	0	0
d1374	d1374.a1	d1374.a1.a1	Chassy_SC_309;N1P7F9;Q07807; mRNA-binding protein PUF3 - PUF3	0	0	2	1	0	0	0	0	2	1	0	0	0	0	1	1	0	1	2	0	0
c995	c995.a1	c995.a1.a1	Chassy_SC_3089;N1P8A1;P21538; DNA-binding protein REB1 - REB1	0	1	7	0	3	0	0	3	4	0	2	0	0	0	4	1	6	0	1	0	0
d1696	d1696.a1	d1696.a1.a1	Chassy_SC_3087;N1NZE9;Q05791; Cell division cycle protein 123 - CDC123	0	0	0	1	0	0	0	0	0	1	0	1	0	0	0	0	0	0	1	0	0
c638	c638.a1	c638.a1.a1	Chassy_SC_3086;N1P939;P47018; Maintenance of telomere capping protein 1 - MTC1	1	7	4	6	4	3	0	3	10	2	8	8	0	0	8	4	6	2	9	1	0
d1040	d1040.a1	d1040.a1.a1	Chassy_SC_3079;N1P1L6;P40188; Respiratory growth induced protein 2 - RGI2	0	1	3	2	3	0	0	4	2	1	3	0	0	0	2	1	3	0	2	0	0
d1950	d1950.a1	d1950.a1.a1	Chassy_SC_3077;N1P0D7;P43132; COMPASS component BRE2 - BRE2	0	0	1	0	0	0	0	0	0	0	0	0	0	0	0	0	0	0	0	0	0
d1427	d1427.a1	d1427.a1.a1	Chassy_SC_3074;N1NWM7;Q12242; UBA domain-containing protein RUP1 - RUP1	0	1	1	1	0	0	0	0	2	0	1	0	0	0	1	1	0	0	1	0	0
c777	c777.a1	c777.a1.a1	Chassy_SC_3070;N1P0Q3;P36035; Carboxylic acid transporter protein homolog - JEN1	2	4	3	1	6	0	2	5	5	4	4	0	1	3	2	6	3	0	2	1	3
c826	c826.a1	c826.a1.a1	Chassy_SC_307;N1P9W5;P23615; Transcription elongation factor SPT6 - SPT6	0	4	5	2	3	5	0	6	3	0	3	3	0	1	4	3	4	0	2	1	1
d2077	d2077.a1	d2077.a1.a1	Chassy_SC_3066;N1PA91;Q07527; tRNA (guanosine(18)-2'-O)-methyltransferase - TRM3	0	0	0	0	0	0	0	0	0	0	0	1	0	0	0	0	0	0	0	0	0
c136	c136.a1	c136.a1.a1	Chassy_SC_3065;N1P4I2;P17076; 60S ribosomal protein L8-A - RPL8A	14	18	25	18	30	19	15	20	18	20	24	19	11	14	18	21	19	14	23	13	12
c976	c976.a1	c976.a1.a1	Chassy_SC_3060;N1NWM6;Q12211; tRNA pseudouridine synthase 1 - PUS1	0	2	3	1	4	2	0	2	3	1	3	1	0	0	2	3	3	1	3	0	0
d1188	d1188.a1	d1188.a1.a1	Chassy_SC_306;N1P7N7;Q04373; Pumilio homology domain family member 6 - PUF6	1	2	1	0	0	3	0	0	1	1	0	0	0	1	1	4	0	2	1	0	0
c896	c896.a1	c896.a1.a1	Chassy_SC_3059;N1NYH5;Q07825; Putative Xaa-Pro aminopeptidase FRA1 - FRA1	1	1	5	5	2	1	0	2	6	2	1	3	0	0	2	2	5	1	3	0	0
d1751	d1751.a1	d1751.a1.a1	Chassy_SC_3058;N1NW95;Q12270; Rhomboid protein 2 - RBD2	0	0	1	0	0	0	0	0	0	0	0	0	0	0	0	0	2	0	0	0	0
d1206	d1206.a1	d1206.a1.a1	Chassy_SC_3055;N1P5D0;P53131; Pre-mRNA-splicing factor ATP-dependent RNA helicase PRP43 - PRP43	0	1	1	2	3	2	0	1	0	0	0	2	0	0	1	0	1	1	2	0	0
d1835	d1835.a1	d1835.a1.a1	Chassy_SC_3054;N1P2Y5;P38719; ATP-dependent RNA helicase DBP8 - DBP8	0	0	0	0	0	0	0	0	0	0	0	0	0	0	1	1	0	0	0	0	0
c372	c372.a1	c372.a1.a1	Chassy_SC_3052;N1NWZ8;Q01532; Cysteine proteinase 1, mitochondrial - LAP3	6	8	14	9	11	12	7	10	9	9	9	11	5	7	11	13	14	8	10	4	3
c858	c858.a1	c858.a1.a1	Chassy_SC_3051;N1P6W7;P40030; Ergosterol biosynthetic protein 28 - ERG28	3	3	2	1	2	4	2	2	2	1	2	4	2	2	2	2	3	3	1	1	1
c373	c373.a1	c373.a1.a1	Chassy_SC_3050;N1PAN8;P16550; Protein APA1 - APA1	6	8	10	10	10	10	7	8	10	10	9	12	7	8	7	10	14	12	12	5	5
c112	c112.a1	c112.a1.a1	Chassy_SC_305;N1P3I5;P40069; Importin subunit beta-4 - KAP123	12	26	26	34	29	22	19	25	25	32	21	31	14	17	20	31	33	16	30	12	14
c190	c190.a1	c190.a1.a1	Chassy_SC_3048;N1P482;P53090; Aromatic/aminoadipate aminotransferase 1 - ARO8	12	24	17	19	20	20	10	26	18	23	24	18	12	8	15	15	19	14	19	7	10
d1130	d1130.a1	d1130.a1.a1	Chassy_SC_3047;N1NZG9;P38623; Serine/threonine-protein kinase RCK2 - RCK2	0	1	2	1	1	1	0	2	2	0	2	2	0	0	2	3	2	0	1	0	0
d1240	d1240.a1	d1240.a1.a1	Chassy_SC_3045;N1NVS4;P46964; Dolichyl-diphosphooligosaccharide--protein glycosyltransferase subunit OST2 - OST2	0	1	1	1	1	1	0	0	1	1	1	2	0	0	2	1	2	1	0	0	0
d1662	d1662.a1	d1662.a1.a1	Chassy_SC_3044;N1P0C8;P36104; COMPASS component SWD2 - SWD2	0	0	1	0	0	0	0	1	1	0	0	0	0	0	0	0	0	0	1	0	0
c628	c628.a1	c628.a1.a1	Chassy_SC_3043;N1P9W2;P53075; Outer spore wall assembly protein SHE10 - SHE10	1	5	8	5	4	4	3	6	9	3	5	7	1	1	7	5	6	3	3	1	1
d1951	d1951.a1	d1951.a1.a1	Chassy_SC_3042;N1P5P8;Q03305; Protein arginine N-methyltransferase 2 - RMT2	0	0	0	0	0	0	0	1	0	0	0	0	0	0	0	0	0	0	0	0	0
a6	a6.a1	a6.a1.a1	Chassy_SC_3041;N1P832;P00560; Phosphoglycerate kinase - PGK1	59	88	106	129	114	126	65	104	96	128	105	125	61	54	86	95	111	101	152	58	57
d1987	d1987.a1	d1987.a1.a1	Chassy_SC_304;N1PA58;P40081; Putative magnesium-dependent phosphatase YER134C - YER134C	0	0	0	0	0	0	0	0	1	0	0	0	0	0	0	0	0	0	0	0	0
c264	c264.a1	c264.a1.a1	Chassy_SC_3039;N1PA67;P16387; Pyruvate dehydrogenase E1 component subunit alpha, mitochondrial - PDA1	11	12	15	14	16	16	9	12	15	15	15	14	8	7	13	18	16	9	16	7	8
d1790	d1790.a1	d1790.a1.a1	Chassy_SC_3038;N1P010;Q06169; Peroxisomal membrane protein PEX30 - PEX30	0	0	0	0	0	0	0	0	1	0	0	0	0	0	1	0	0	0	0	0	0
a7	a7.a1	a7.a1.a1	Chassy_SC_3037;N1P0M8;P07149; Fatty acid synthase subunit beta - FAS1	62	117	96	117	104	71	74	102	104	110	98	90	66	61	89	109	125	67	110	59	60
c108	c108.a1	c108.a1.a1	Chassy_SC_3036;N1P4D4;P39676; Flavohemoprotein - YHB1	14	30	13	34	40	37	10	30	12	28	35	37	16	13	7	30	37	25	33	12	11
d1992	d1992.a1	d1992.a1.a1	Chassy_SC_3035;N1P257;Q12178; Cytosine deaminase - FCY1	0	0	0	1	0	0	0	0	0	0	0	0	0	0	0	0	0	0	0	0	0
d1879	d1879.a1	d1879.a1.a1	Chassy_SC_3030;N1P209;P40502; Altered inheritance of mitochondria protein 19, mitochondrial - AIM19	0	0	1	0	0	0	0	0	0	0	0	0	0	0	0	0	1	0	0	0	0
d1725	d1725.a1	d1725.a1.a1	Chassy_SC_303;N1P743;P38142; Probable metabolite transport protein YBR241C - YBR241C	0	0	0	0	0	0	0	0	0	0	0	0	0	0	1	2	0	0	0	0	0
c339	c339.a1	c339.a1.a1	Chassy_SC_3028;N1P0D9;P40215; External NADH-ubiquinone oxidoreductase 1, mitochondrial - NDE1	7	10	12	17	13	5	6	11	12	17	13	6	5	6	10	14	18	3	17	6	6
c691	c691.a1	c691.a1.a1	Chassy_SC_3023;N1NWM1;Q08968; UPF0061 protein FMP40 - FMP40	1	3	7	8	2	0	1	6	8	7	3	0	1	1	7	4	8	0	8	0	0
d1977	d1977.a1	d1977.a1.a1	Chassy_SC_3022;N1P0B0;P32862; Glucose transport transcription regulator RGT1 - RGT1	0	0	0	0	0	0	0	0	0	1	0	0	0	0	0	0	0	0	0	0	0
c102	c102.a1	c102.a1.a1	Chassy_SC_3021;N1NY83;P15705; Heat shock protein STI1 - STI1	21	27	34	32	27	17	19	21	30	29	32	21	17	22	31	22	29	16	41	16	17
d1702	d1702.a1	d1702.a1.a1	Chassy_SC_302;N1NWH4;Q08444; 20S-pre-rRNA D-site endonuclease NOB1 - NOB1	0	0	0	0	0	1	0	0	0	1	0	0	0	0	0	0	0	0	1	0	0
c727	c727.a1	c727.a1.a1	Chassy_SC_3014;N1NW46;Q02776; Mitochondrial import inner membrane translocase subunit TIM50 - TIM50	1	5	4	5	4	4	2	2	3	3	3	5	1	2	3	4	3	4	6	1	0
d1715	d1715.a1	d1715.a1.a1	Chassy_SC_3012;N1P640;P25654; UPF0587 protein YCR090C - YCR090C	0	0	0	0	0	0	0	0	1	0	0	0	0	0	0	0	2	0	0	0	0
b95	b95.a1	b95.a1.a1	Chassy_SC_3008;N1P5F4;P04147; Polyadenylate-binding protein, cytoplasmic and nuclear - PAB1	22	27	27	29	29	22	21	27	30	28	30	29	25	21	26	26	32	19	34	25	19
c204	c204.a1	c204.a1.a1	Chassy_SC_3007;N1P448;P00958; Methionine--tRNA ligase, cytoplasmic - MES1	13	16	17	16	14	23	11	19	16	18	17	25	11	11	14	17	23	17	22	6	7
c935	c935.a1	c935.a1.a1	Chassy_SC_3006;N1P5M0;P38929; Calcium-transporting ATPase 2 - PMC1	1	2	5	1	1	3	1	0	2	2	1	5	0	0	3	2	5	3	1	0	0
c148	c148.a1	c148.a1.a1	Chassy_SC_300;I9KWR6;CENPK specific;No description in SC288c, annotation and gene name in CENPK: Uncharacterized protein (Fragment) -CENPK1137D_2820	12	12	15	8	12	25	11	11	11	8	11	24	11	10	15	17	13	17	7	11	9
c202	c202.a1	c202.a1.a1	Chassy_SC_3;N1P3Y5;Q08911; Formate dehydrogenase 1 - FDH1	8	16	27	16	29	0	12	21	27	13	29	0	10	6	24	32	27	0	22	8	8
c947	c947.a1	c947.a1.a1	Chassy_SC_2996;N1P1U0;O13547; Covalently-linked cell wall protein 14 - CCW14	0	2	2	3	2	3	0	0	2	3	2	3	0	0	3	2	2	5	3	0	0
d1384	d1384.a1	d1384.a1.a1	Chassy_SC_2995;N1NYT4;Q06078; U3 small nucleolar RNA-associated protein 21 - UTP21	0	2	1	1	1	1	0	0	1	1	0	1	0	0	0	0	1	0	1	0	0
d1213	d1213.a1	d1213.a1.a1	Chassy_SC_2993;N1P5D4;P12904; 5'-AMP-activated protein kinase subunit gamma - SNF4	0	1	2	1	0	2	0	1	2	1	0	1	0	0	1	1	3	0	1	0	0
c796	c796.a1	c796.a1.a1	Chassy_SC_299;N1P917;P39726; Glycine cleavage system H protein, mitochondrial - GCV3	0	3	3	3	4	3	0	3	3	3	3	4	0	0	3	6	4	3	3	1	1
d1392	d1392.a1	d1392.a1.a1	Chassy_SC_2989;N1P6W1;Q05946; U3 small nucleolar RNA-associated protein 13 - UTP13	0	0	0	1	1	1	0	0	0	0	0	2	0	0	1	1	1	1	1	0	0
c457	c457.a1	c457.a1.a1	Chassy_SC_2986;N1NXS2;P53885; Signal transduction protein MDG1 - MDG1	2	12	13	7	14	3	0	11	12	7	13	3	2	0	13	13	15	1	8	0	0
c106	c106.a2	c106.a2.a1	Chassy_SC_2981;N1P0C2;P47176; Branched-chain-amino-acid aminotransferase, cytosolic - BAT2	3	13	15	6	17	10	3	18	14	8	17	7	4	3	11	14	18	7	8	4	4
b57	b57.a2	b57.a2.a1	Chassy_SC_2980;N1NXG4;Q12499; Nucleolar protein 58 - NOP58	8	14	16	15	15	19	8	14	14	16	14	22	7	8	14	13	16	13	17	4	6
d2065	d2065.a1	d2065.a1.a1	Chassy_SC_2979;N1PAC2;Q04311; Protein VMS1 - VMS1	0	0	0	0	0	0	0	0	0	0	0	0	0	0	0	0	1	0	0	0	0
d1430	d1430.a1	d1430.a1.a1	Chassy_SC_2978;N1P4K3;P32347; Uroporphyrinogen decarboxylase - HEM12	0	1	0	0	0	2	0	0	0	0	0	2	0	0	0	0	2	2	0	0	0
c569	c569.a1	c569.a1.a1	Chassy_SC_2975;N1P3R4;P32787; Mitochondrial genome maintenance protein MGM101 - MGM101	0	9	5	6	10	3	0	9	8	4	9	3	1	1	6	10	13	2	7	0	1
d1222	d1222.a1	d1222.a1.a1	Chassy_SC_2973;N1NYR1;Q04279; Eisosome protein SEG1 - SEG1	0	1	1	0	3	0	0	1	3	0	1	0	0	0	1	3	1	0	1	0	0
d1866	d1866.a1	d1866.a1.a1	Chassy_SC_2972;N1NVG8;Q08975; Hydroxymethylpyrimidine/phosphomethylpyrimidine kinase THI21 - THI21	0	0	0	0	0	0	0	0	0	0	0	0	0	0	1	0	0	0	1	0	0
d2027	d2027.a1	d2027.a1.a1	Chassy_SC_2970;N1NYW4;P52593; Nucleoporin NUP188 - NUP188	0	0	1	0	0	0	0	0	0	0	0	0	0	0	0	0	0	0	0	0	0
c905	c905.a1	c905.a1.a1	Chassy_SC_2969;N1PAE7;P11075; Protein transport protein SEC7 - SEC7	0	6	6	1	4	1	1	0	3	3	1	4	0	0	5	2	3	0	1	0	0
d1767	d1767.a1	d1767.a1.a1	Chassy_SC_2967;N1NZQ9;P48563; Protein MON2 - MON2	0	0	1	1	0	0	0	0	0	0	0	0	0	0	0	0	1	0	0	0	0
d1121	d1121.a1	d1121.a1.a1	Chassy_SC_2961;N1P967;P40553; Peroxiredoxin DOT5 - DOT5	0	3	1	0	2	0	0	3	1	0	3	0	0	0	1	1	3	0	4	0	0
d1614	d1614.a1	d1614.a1.a1	Chassy_SC_2960;N1NZ90;P22211; Nitrogen permease reactivator protein - NPR1	0	0	1	0	1	0	0	0	0	0	1	0	0	0	1	0	1	0	0	0	0
c336	c336.a1	c336.a1.a1	Chassy_SC_296;N1NXR4;Q02821; Importin subunit alpha - SRP1	6	12	9	13	14	13	6	13	11	16	14	18	5	4	5	12	16	6	16	4	5
c254	c254.a1	c254.a1.a1	Chassy_SC_2959;N1P996;P39076; T-complex protein 1 subunit beta - CCT2	5	15	13	25	18	14	4	16	15	23	19	16	6	5	14	19	18	8	18	3	3
d1919	d1919.a1	d1919.a1.a1	Chassy_SC_2957;N1P4C5;P40463; Protein VHS2 - VHS2	0	0	0	0	0	0	0	0	0	0	1	0	0	0	0	0	0	0	0	0	0
c277	c277.a1	c277.a1.a1	Chassy_SC_2956;N1P248;CENPK specific;No description in SC288c, annotation and gene name in CENPK: Ribosomal protein L15 -CENPK1137D_877	14	13	13	13	15	14	12	10	11	12	13	14	12	13	11	13	13	8	12	10	11
c159	c159.a1	c159.a1.a1	Chassy_SC_2955;N1P9Z9;P32527; Zuotin - ZUO1	7	22	21	20	30	24	7	22	23	23	27	28	9	9	17	23	26	15	23	4	5
d1802	d1802.a1	d1802.a1.a1	Chassy_SC_295;N1P5U1;Q07688; Phosphorelay intermediate protein YPD1 - YPD1	0	0	0	0	1	0	0	1	0	0	0	0	0	0	0	0	0	0	0	0	0
d2007	d2007.a1	d2007.a1.a1	Chassy_SC_2949;N1NZ32;Q3E846; Cytochrome c oxidase assembly factor 6 - COA6	0	0	0	0	1	0	0	0	0	0	0	0	0	0	0	0	0	0	0	0	0
c189	c189.a1	c189.a1.a1	Chassy_SC_2948;N1P548;P38968; Protein transport protein SEC31 - SEC31	8	24	19	17	21	20	9	19	21	19	19	17	11	7	22	22	24	11	19	11	10
c870	c870.a1	c870.a1.a1	Chassy_SC_2947;N1PA68;P40098; Uncharacterized mitochondrial membrane protein FMP10 - FMP10	0	3	3	3	3	3	0	2	2	3	4	3	0	0	4	3	3	2	3	0	0
b58	b58.a1	b58.a1.a1	Chassy_SC_2946;N1P3Q2;P29311; Protein BMH1 - BMH1	19	33	34	33	35	31	15	34	33	30	36	33	18	19	30	35	32	24	32	14	18
c485	c485.a1	c485.a1.a1	Chassy_SC_2943;N1PAF2;P15424; ATP-dependent RNA helicase MSS116, mitochondrial - MSS116	2	12	6	8	7	9	4	9	4	8	11	8	2	3	6	8	11	7	9	1	3
c377	c377.a1	c377.a1.a1	Chassy_SC_2942;N1NVL4;P09064; Eukaryotic translation initiation factor 2 subunit beta - SUI3	4	11	12	11	9	8	4	11	14	14	8	15	3	5	10	13	14	7	11	3	1
c578	c578.a1	c578.a1.a1	Chassy_SC_2936;N1P3D7;P53199; Sterol-4-alpha-carboxylate 3-dehydrogenase, decarboxylating - ERG26	2	5	3	7	7	10	3	6	4	6	5	10	2	4	2	6	7	4	6	2	3
d1340	d1340.a1	d1340.a1.a1	Chassy_SC_2933;N1P4T5;P43556; Rho-GTPase-activating protein RGD2 - RGD2	0	0	0	3	0	1	0	1	0	1	0	2	0	0	0	0	2	0	2	0	0
d1486	d1486.a1	d1486.a1.a1	Chassy_SC_2930;N1NYP3;Q05031; Mannan endo-1,6-alpha-mannosidase DFG5 - DFG5	1	1	0	0	1	1	0	1	0	0	1	0	0	0	1	0	1	0	0	0	0
c439	c439.a1	c439.a1.a1	Chassy_SC_2929;N1NVQ5;Q12462; Peroxisomal membrane protein PMP27 - PEX11	7	10	9	7	10	5	7	7	8	7	8	6	6	5	11	9	11	4	6	7	6
d1690	d1690.a1	d1690.a1.a1	Chassy_SC_2928;N1P6R8;P43587; Type 1 phosphatases regulator YPI1 - YPI1	0	0	1	0	1	0	0	1	0	0	1	0	0	0	0	0	0	0	0	0	0
d1288	d1288.a1	d1288.a1.a1	Chassy_SC_2927;N1P2A9;P35184; Ribosome assembly protein SQT1 - SQT1	0	1	1	1	1	1	0	1	1	1	1	2	0	0	0	1	1	0	1	0	0
d1956	d1956.a1	d1956.a1.a1	Chassy_SC_2920;N1NYE1;P53848; Folic acid synthesis protein FOL1 - FOL1	0	0	0	1	0	0	0	0	0	0	0	0	0	0	0	0	0	0	0	0	0
c180	c180.a1	c180.a1.a1	Chassy_SC_292;N1P922;P39730; Eukaryotic translation initiation factor 5B - FUN12	12	21	24	20	18	19	11	20	20	24	15	17	9	10	17	22	24	14	25	8	9
c579	c579.a2	c579.a2.a1	Chassy_SC_2919;N1P0I1;P33324; CRAL-TRIO domain-containing protein YKL091C - YKL091C	0	2	2	0	2	0	0	2	2	0	3	0	1	0	2	0	0	2	0	1	0
d1246	d1246.a1	d1246.a1.a1	Chassy_SC_2918;N1NYV7;Q03579; Ceramide synthase subunit LIP1 - LIP1	0	0	0	2	2	2	0	1	1	0	2	1	0	0	2	1	0	1	0	0	0
d1057	d1057.a1	d1057.a1.a1	Chassy_SC_2917;N1NXU2;P42842; Essential for maintenance of the cell wall protein 1 - EMW1	0	2	2	3	2	2	0	0	2	2	0	1	0	0	2	2	3	0	3	0	0
d1005	d1005.a1	d1005.a1.a1	Chassy_SC_2914;N1P5Z4;Q07651; SUR7 family protein FMP45 - FMP45	0	1	2	1	2	0	2	2	2	3	2	0	0	1	3	1	5	0	2	1	1
c470	c470.a1	c470.a1.a1	Chassy_SC_2911;N1P8H5;P38988; Mitochondrial GTP/GDP carrier protein 1 - GGC1	4	10	9	6	9	8	3	10	9	7	12	7	3	3	9	10	10	4	7	3	2
c425	c425.a1	c425.a1.a1	Chassy_SC_291;N1P384;P08518; DNA-directed RNA polymerase II subunit RPB2 - RPB2	1	13	14	6	6	10	4	10	10	10	7	11	4	0	14	10	12	5	11	4	2
c960	c960.a1	c960.a1.a1	Chassy_SC_2905;N1P916;P39721; Protein AIM2 - AIM2	0	3	3	0	4	1	0	4	4	0	5	0	0	0	4	4	4	0	0	0	0
d1740	d1740.a1	d1740.a1.a1	Chassy_SC_2903;N1P495;P42934; Dolichyl-phosphate-mannose--protein mannosyltransferase 6 - PMT6	0	0	0	1	0	0	0	0	0	1	0	0	0	0	0	0	0	1	0	0	0
d1265	d1265.a1	d1265.a1.a1	Chassy_SC_2900;N1NWF1;Q06089; Uncharacterized mitochondrial outer membrane protein YPR098C - YPR098C	1	1	2	1	0	0	1	0	1	1	1	0	0	1	1	1	1	0	0	1	0
d1904	d1904.a1	d1904.a1.a1	Chassy_SC_2899;N1P389;Q99312; IMP-specific 5'-nucleotidase 1 - ISN1	0	0	0	0	0	1	0	0	0	0	0	0	0	0	0	0	0	0	0	0	0
d1653	d1653.a1	d1653.a1.a1	Chassy_SC_2897;N1P2N7;Q08925; RNA-binding protein MRN1 - MRN1	0	1	0	0	0	0	0	1	0	0	1	0	0	0	0	1	0	0	0	0	0
c409	c409.a1	c409.a1.a1	Chassy_SC_2895;N1NWH9;P07143; Cytochrome c1, heme protein, mitochondrial - CYT1	7	9	9	13	8	8	5	8	9	10	9	6	6	7	10	11	10	5	10	5	5
c861	c861.a1	c861.a1.a1	Chassy_SC_2892;N1NW25;P15496; Isopentenyl-diphosphate Delta-isomerase - IDI1	0	3	4	4	2	0	1	2	3	3	5	0	0	0	4	4	4	0	3	2	1
d1410	d1410.a1	d1410.a1.a1	Chassy_SC_2891;N1P4V1;Q03774; tRNA (guanine-N(7)-)-methyltransferase non-catalytic subunit TRM82 - TRM82	0	1	2	0	2	1	0	2	0	0	0	0	0	0	0	0	1	0	1	0	0
c551	c551.a1	c551.a1.a1	Chassy_SC_289;N1NZU9;P40364; Mitochondrial peculiar membrane protein 1 - MPM1	2	6	9	5	8	5	0	9	9	5	7	8	2	1	9	5	7	6	8	1	1
c783	c783.a1	c783.a1.a1	Chassy_SC_2884;N1P0Z8;P32353; Delta(7)-sterol 5(6)-desaturase - ERG3	2	5	3	0	2	7	2	3	2	0	0	7	1	2	3	5	3	4	1	2	2
c558	c558.a1	c558.a1.a1	Chassy_SC_2883;N1P4I1;P51996; GTP-binding protein YPT32/YPT11 - YPT32	3	6	6	5	3	6	3	5	5	7	6	5	1	2	6	6	4	4	5	3	2
d1533	d1533.a1	d1533.a1.a1	Chassy_SC_2882;N1PAI3;Q05518; Protein PAL1 - PAL1	0	0	1	2	0	1	0	0	0	0	0	3	0	0	0	0	0	0	0	0	0
d1571	d1571.a1	d1571.a1.a1	Chassy_SC_2878;N1P8R4;P34217; RNA-binding protein PIN4 - PIN4	0	0	2	0	0	0	0	0	0	0	0	2	0	0	0	0	2	0	0	0	0
d1995	d1995.a1	d1995.a1.a1	Chassy_SC_2875;N1P8J7;Q00618; Geranylgeranyl transferase type-2 subunit alpha - BET4	0	0	0	1	0	0	0	0	0	0	0	0	0	0	0	0	0	0	0	0	0
c807	c807.a1	c807.a1.a1	Chassy_SC_2871;N1NY41;Q08193; 1,3-beta-glucanosyltransferase GAS5 - GAS5	2	3	3	3	3	3	1	3	3	3	3	3	2	1	3	3	3	3	4	0	0
c793	c793.a1	c793.a1.a1	Chassy_SC_2870;N1P5P6;Q07500; External NADH-ubiquinone oxidoreductase 2, mitochondrial - NDE2	1	6	6	0	5	0	1	5	7	0	4	0	1	1	5	5	6	0	0	0	0
d1417	d1417.a1	d1417.a1.a1	Chassy_SC_287;N1P0N7;P32860; NifU-like protein, mitochondrial - NFU1	0	1	0	1	1	0	0	0	1	1	1	0	0	0	0	1	1	0	1	0	0
c487	c487.a2	c487.a2.a1	Chassy_SC_2868;N1P7H6;Q06205; FK506-binding protein 4 - FPR4	1	3	4	3	4	0	2	3	1	3	6	3	1	1	4	3	4	2	3	1	2
d1075	d1075.a1	d1075.a1.a1	Chassy_SC_2865;N1P372;P53164; NADH pyrophosphatase - NPY1	0	2	2	2	3	1	0	2	1	2	1	2	0	0	1	1	2	1	2	0	0
c648	c648.a1	c648.a1.a1	Chassy_SC_2863;N1P8Y7;P15454; Guanylate kinase - GUK1	1	4	8	5	7	0	1	7	7	5	7	0	0	0	7	7	9	0	5	0	2
d1010	d1010.a1	d1010.a1.a1	Chassy_SC_2862;N1P7D9;P38197; Pyridoxal phosphate homeostasis protein - YBL036C	0	0	1	5	3	0	0	2	3	4	1	1	0	0	2	4	2	0	2	0	0
b91	b91.a1	b91.a1.a1	Chassy_SC_2859;N1NWR7;P00890; Citrate synthase, mitochondrial - CIT1	13	11	20	46	36	17	10	20	24	31	20	25	12	13	21	29	17	18	37	10	11
d1460	d1460.a1	d1460.a1.a1	Chassy_SC_2856;N1PA64;P32657; Chromo domain-containing protein 1 - CHD1	0	1	0	1	1	0	0	1	0	0	0	0	0	1	0	0	1	0	1	0	1
d1563	d1563.a1	d1563.a1.a1	Chassy_SC_2853;N1NZB4;P34243;|reversed DNA polymerase alpha-associated DNA helicase A - HCS1	0	1	0	0	0	0	0	0	0	3	2	0	0	0	0	0	0	0	0	0	0
d1093	d1093.a1	d1093.a1.a1	Chassy_SC_2850;N1P6M5;CENPK specific;No description in SC288c, annotation and gene name in CENPK: Hem1p -CENPK1137D_4056	0	0	0	0	0	7	1	0	0	0	0	6	0	0	0	0	1	7	2	0	0
c603	c603.a1	c603.a1.a1	Chassy_SC_2846;N1P924;P39714; (R,R)-butanediol dehydrogenase - BDH1	2	3	6	0	3	11	3	4	6	5	2	16	1	2	5	5	3	9	4	2	2
d1242	d1242.a1	d1242.a1.a1	Chassy_SC_2844;N1P1H6;P38759; Vacuolar protein sorting-associated protein 29 - VPS29	0	1	1	1	1	1	0	1	1	2	1	1	0	0	1	1	1	0	2	0	0
d1097	d1097.a1	d1097.a1.a1	Chassy_SC_2843;N1NYL8;P32875; Lipoyl synthase, mitochondrial - LIP5	0	2	2	2	2	2	0	1	1	2	1	2	0	0	1	0	4	0	2	0	0
c515	c515.a1	c515.a1.a1	Chassy_SC_2839;N1P9L6;P38328; Actin-related protein 2/3 complex subunit 1 - ARC40	3	8	9	6	6	6	4	7	9	8	7	5	1	2	8	12	11	2	8	2	2
d1963	d1963.a1	d1963.a1.a1	Chassy_SC_2836;N1NZ42;Q04500; U3 small nucleolar RNA-associated protein 14 - UTP14	0	0	0	0	0	0	0	0	0	0	0	1	0	0	0	0	0	0	0	0	0
d2086	d2086.a1	d2086.a1.a1	Chassy_SC_2833;N1NZN1;Q12500; Late secretory pathway protein AVL9 - AVL9	0	0	0	0	0	0	0	0	0	0	0	0	0	0	0	0	1	0	0	0	0
c150	c150.a1	c150.a1.a1	Chassy_SC_283;N1NYS4;P37012; Phosphoglucomutase 2 - PGM2	15	18	26	16	23	13	17	19	29	18	20	14	17	15	27	27	20	7	12	10	12
c139	c139.a1	c139.a1.a1	Chassy_SC_2828;N1P8S2;P23641; Mitochondrial phosphate carrier protein - MIR1	16	20	25	29	21	18	14	20	25	31	23	17	15	13	20	22	26	13	30	13	16
c812	c812.a1	c812.a1.a1	Chassy_SC_2827;N1NYS6;P48510; Ubiquitin domain-containing protein DSK2 - DSK2	0	2	4	4	4	2	0	2	5	2	4	3	0	1	4	4	4	3	4	0	0
c450	c450.a1	c450.a1.a1	Chassy_SC_282;N1P132;P05740; 60S ribosomal protein L17-A - RPL17A	4	9	12	6	10	6	3	6	8	6	12	6	2	3	7	6	8	6	9	3	4
c823	c823.a1	c823.a1.a1	Chassy_SC_2817;N1P998;P40462; Protein TMA108 - TMA108	0	5	2	4	1	4	1	3	3	3	3	1	1	0	3	2	8	3	3	0	0
d1135	d1135.a1	d1135.a1.a1	Chassy_SC_2815;N1P3Y0;P20433; DNA-directed RNA polymerase II subunit RPB4 - RPB4	0	0	1	2	1	2	0	2	2	2	2	1	0	0	1	1	3	0	2	0	0
b21	b21.a1	b21.a1.a1	Chassy_SC_2813;N1P1J9;P19414; Aconitate hydratase, mitochondrial - ACO1	31	44	49	51	52	46	32	49	47	51	51	50	28	29	45	46	53	33	59	28	25
c182	c182.a1	c182.a1.a1	Chassy_SC_2810;N1P1Z0;P11986; Inositol-3-phosphate synthase - INO1	10	18	25	25	18	15	9	23	23	24	17	14	11	13	20	18	20	8	26	9	12
d1630	d1630.a1	d1630.a1.a1	Chassy_SC_2809;N1NZJ2;Q06218; ATP-dependent RNA helicase DBP9 - DBP9	0	0	1	0	0	0	0	0	0	1	0	0	0	0	2	0	1	0	0	0	0
c730	c730.a1	c730.a1.a1	Chassy_SC_2805;N1P5S4;Q07451; Endoplasmic reticulum transmembrane protein 3 - YET3	3	3	5	3	3	3	3	2	4	2	1	4	3	2	4	5	2	3	3	3	3
c355	c355.a1	c355.a1.a1	Chassy_SC_2801;N1P0L9;P40531; Protein GVP36 - GVP36	9	10	9	11	11	9	9	11	10	11	12	9	3	6	10	12	13	9	13	7	9
d1436	d1436.a1	d1436.a1.a1	Chassy_SC_280;N1P2Z6;P36000; AP-1 complex subunit beta-1 - APL2	0	1	1	0	0	1	0	0	1	1	0	1	0	0	0	0	2	0	1	0	0
c963	c963.a1	c963.a1.a1	Chassy_SC_2798;N1NVU9;Q08601; Metacaspase-1 - MCA1	1	2	3	2	3	2	0	3	2	2	2	2	0	0	1	2	5	1	3	0	0
d1390	d1390.a1	d1390.a1.a1	Chassy_SC_2796;N1P872;P32583; Suppressor protein SRP40 - SRP40	0	0	1	0	2	2	0	1	0	0	1	0	1	0	0	0	2	0	0	0	0
d1331	d1331.a1	d1331.a1.a1	Chassy_SC_2795;N1P4D1;P32597; Nuclear protein STH1/NPS1 - STH1	0	0	1	2	0	2	0	0	0	0	0	1	0	0	2	0	3	0	1	0	0
c863	c863.a1	c863.a1.a1	Chassy_SC_2793;N1PA41;P40037; Protein HMF1 - HMF1	3	2	4	3	4	0	2	4	3	1	5	0	1	0	2	2	4	0	2	1	2
c500	c500.a1	c500.a1.a1	Chassy_SC_2792;N1NXX8;Q08971; Protein PBDC1 homolog - YPL225W	3	7	5	9	9	6	2	8	8	10	9	7	2	2	9	9	11	4	9	2	1
c943	c943.a1	c943.a1.a1	Chassy_SC_2791;N1P7S3;P33333; Probable 1-acyl-sn-glycerol-3-phosphate acyltransferase - SLC1	0	1	2	1	2	5	1	1	2	2	1	7	1	0	4	3	1	2	1	0	0
d1541	d1541.a1	d1541.a1.a1	Chassy_SC_2790;N1P6W8;Q06677; Auxilin-like clathrin uncoating factor SWA2 - SWA2	0	0	1	1	0	0	0	0	2	1	1	0	0	0	0	0	1	0	0	0	0
b62	b62.a1	b62.a1.a1	Chassy_SC_279;N1NZD0;P41939; Isocitrate dehydrogenase [NADP] cytoplasmic - IDP2	12	20	23	20	30	3	10	22	24	22	26	3	12	11	24	22	27	4	25	13	10
d1777	d1777.a1	d1777.a1.a1	Chassy_SC_2789;N1P8F3;P12954; ATP-dependent DNA helicase SRS2 - SRS2	0	0	0	1	0	0	0	0	0	0	0	0	0	0	0	0	0	0	1	0	0
c246	c246.a1	c246.a1.a1	Chassy_SC_2788;N1P5Q4;P32891; D-lactate dehydrogenase [cytochrome] 1, mitochondrial - DLD1	10	16	18	18	15	17	11	11	14	16	15	17	11	7	9	15	21	15	17	7	9
d1501	d1501.a1	d1501.a1.a1	Chassy_SC_2787;N1P2W1;Q12149; Exosome complex exonuclease RRP6 - RRP6	0	1	0	0	0	2	0	1	1	0	0	1	0	0	0	0	0	0	2	0	0
c962	c962.a1	c962.a1.a1	Chassy_SC_2786;N1NZY7;P53617; Protein NRD1 - NRD1	0	3	3	3	4	2	0	3	1	2	1	3	0	0	2	0	6	1	2	0	0
d1098	d1098.a1	d1098.a1.a1	Chassy_SC_2784;N1P7T1;P25555; Single-strand telomeric DNA-binding protein GBP2 - GBP2	0	1	1	3	2	1	0	2	1	2	2	1	0	0	1	1	2	1	3	0	0
c138	c138.a1	c138.a1.a1	Chassy_SC_2783;N1NZI6;P41805; 60S ribosomal protein L10 - RPL10	13	22	24	22	28	21	12	24	24	26	27	25	14	11	18	25	27	18	26	10	10
c482	c482.a1	c482.a1.a1	Chassy_SC_2782;N1NWD7;P32179; 3'(2'),5'-bisphosphate nucleotidase - MET22	1	13	10	10	11	3	2	11	6	7	11	6	2	2	6	10	13	5	7	3	1
d1330	d1330.a1	d1330.a1.a1	Chassy_SC_2781;N1P7C3;P35817; Bromodomain-containing factor 1 - BDF1	0	2	1	0	2	1	0	2	1	0	1	0	0	0	1	0	1	0	0	0	0
c779	c779.a1	c779.a1.a1	Chassy_SC_278;N1P803;P28495; F-actin-capping protein subunit alpha - CAP1	0	2	3	4	6	4	0	6	3	4	4	4	0	0	4	5	3	2	3	0	0
d1774	d1774.a1	d1774.a1.a1	Chassy_SC_2776;N1P2E1;P05374; Phosphatidylethanolamine N-methyltransferase - CHO2	0	0	0	0	0	0	0	0	0	0	0	2	0	0	0	0	1	0	0	0	0
c609	c609.a1	c609.a1.a1	Chassy_SC_2775;N1NZT2;P21304; Periodic tryptophan protein 1 - PWP1	2	6	4	8	5	5	2	6	3	5	6	6	2	2	4	5	8	3	6	2	1
b36	b36.a1	b36.a1.a1	Chassy_SC_2774;N1P634;P07245; C-1-tetrahydrofolate synthase, cytoplasmic - ADE3	27	46	51	47	49	57	30	48	47	47	40	65	28	27	42	42	52	50	48	27	26
c840	c840.a1	c840.a1.a1	Chassy_SC_2772;N1P8Q5;P38325; Mitochondrial outer membrane protein OM14 - OM14	1	2	3	4	2	1	1	4	4	4	3	1	1	1	2	3	3	0	5	2	1
d1778	d1778.a1	d1778.a1.a1	Chassy_SC_277;N1P4J0;P38712; ATP-dependent rRNA helicase RRP3 - RRP3	0	0	0	0	1	0	0	0	0	0	0	0	0	0	0	0	1	0	0	0	0
d1610	d1610.a1	d1610.a1.a1	Chassy_SC_2769;N1P019;P47103; Peptidyl-prolyl cis-trans isomerase CYP7 - CPR7	0	1	0	0	0	1	0	0	1	0	0	0	0	0	0	0	2	0	0	0	0
d2066	d2066.a1	d2066.a1.a1	Chassy_SC_2768;N1P9T7;P31374; Serine/threonine-protein kinase PSK1 - PSK1	0	0	1	0	0	0	0	0	0	0	0	0	0	0	0	0	0	0	0	0	0
b82	b82.a1	b82.a1.a1	Chassy_SC_2766;N1NWW2;P14126; 60S ribosomal protein L3 - RPL3	21	29	27	29	43	29	21	29	29	31	33	33	20	19	24	33	43	24	36	21	19
d1575	d1575.a1	d1575.a1.a1	Chassy_SC_2763;N1NXJ7;P42847; 37S ribosomal protein S18, mitochondrial - MRPS18	0	1	0	0	2	0	0	0	0	0	0	1	0	0	0	0	1	0	1	0	0
c763	c763.a1	c763.a1.a1	Chassy_SC_2761;N1P4A6;Q07657; Seventh homolog of septin 1 - SHS1	0	3	7	2	5	3	0	4	4	3	4	2	0	0	5	4	7	1	4	0	0
c253	c253.a1	c253.a1.a1	Chassy_SC_2760;N1P2F8;P00724; Invertase 2 - SUC2	9	5	10	25	7	25	8	10	11	30	6	25	12	8	6	5	7	22	31	10	7
d1317	d1317.a1	d1317.a1.a1	Chassy_SC_2758;N1NXW7;P38629; Replication factor C subunit 3 - RFC3	0	1	1	1	1	1	0	1	1	1	1	1	0	0	0	1	1	0	1	0	0
b28	b28.a2	b28.a2.a1	Chassy_SC_2757;N1PAU3;P32590; Heat shock protein homolog SSE2 - SSE2	19	25	27	27	21	8	18	27	34	22	30	8	17	15	24	25	32	6	25	18	17
b93	b93.a1	b93.a1.a1	Chassy_SC_2756;N1PAC0;P15180; Lysine--tRNA ligase, cytoplasmic - KRS1	17	31	30	30	29	25	23	26	30	33	30	33	10	18	25	28	36	24	38	17	21
c641	c641.a1	c641.a1.a1	Chassy_SC_2755;N1NY64;P53723; UPF0674 endoplasmic reticulum membrane protein YNR021W - YNR021W	2	6	6	6	5	5	2	4	4	3	3	6	3	3	3	7	6	3	5	2	1
d1892	d1892.a1	d1892.a1.a1	Chassy_SC_2753;N1P3K1;Q08687; Translation machinery-associated protein 16 - TMA16	0	0	0	0	1	0	0	0	0	0	0	0	0	0	0	0	0	0	0	0	0
c389	c389.a1	c389.a1.a1	Chassy_SC_2750;N1NXW0;P30952; Malate synthase 1, glyoxysomal - MLS1	4	10	12	10	18	0	3	15	17	9	17	0	2	5	11	14	16	0	11	2	4
c352	c352.a1	c352.a1.a1	Chassy_SC_275;N1P5Y0;P15646; rRNA 2'-O-methyltransferase fibrillarin - NOP1	8	12	9	10	13	9	5	10	8	13	7	13	9	9	11	12	17	11	9	6	4
c535	c535.a1	c535.a1.a1	Chassy_SC_2744;N1P726;Q05905; Protein HRI1 - HRI1	2	9	8	4	6	7	3	10	7	7	7	7	1	2	9	6	8	6	6	1	1
d1588	d1588.a1	d1588.a1.a1	Chassy_SC_2741;N1P1L9;P49167; 60S ribosomal protein L38 - RPL38	0	0	1	0	1	0	0	1	0	0	1	0	0	0	0	1	1	0	0	0	0
c405	c405.a1	c405.a1.a1	Chassy_SC_2739;N1P3K9;Q08723; 26S proteasome regulatory subunit RPN8 - RPN8	3	10	9	12	11	9	3	10	11	12	14	8	0	2	7	12	13	8	14	1	3
d1828	d1828.a1	d1828.a1.a1	Chassy_SC_2737;N1P2V7;P38902; DNA-directed RNA polymerase II subunit RPB11 - RPB11	0	0	0	0	1	0	0	0	0	0	1	0	0	0	0	0	0	0	0	0	0
d1551	d1551.a1	d1551.a1.a1	Chassy_SC_2734;N1P936;P08018; MAP kinase kinase PBS2 - PBS2	0	0	0	0	0	0	0	0	1	0	1	0	0	0	2	0	2	0	0	0	0
c303	c303.a1	c303.a1.a1	Chassy_SC_2733;N1P3W2;P49723; Ribonucleoside-diphosphate reductase small chain 2 - RNR4	4	10	10	10	18	20	4	19	13	9	12	23	4	7	10	15	15	13	10	6	6
c294	c294.a1	c294.a1.a1	Chassy_SC_2731;N1P072;P31412; V-type proton ATPase subunit C - VMA5	6	11	14	15	14	15	8	12	15	18	14	17	6	7	10	12	17	12	14	5	3
a1	a1.a2	a1.a2.a1	Chassy_SC_273;N1P004;P00358; Glyceraldehyde-3-phosphate dehydrogenase 2 - TDH2	34	66	83	113	109	101	42	83	82	115	104	113	40	37	78	77	95	95	146	32	36
d1216	d1216.a1	d1216.a1.a1	Chassy_SC_2729;N1NYT8;P39685; Nucleoporin POM152 - POM152	0	1	1	2	0	1	0	0	1	1	1	1	0	0	3	2	2	0	1	0	0
d1687	d1687.a1	d1687.a1.a1	Chassy_SC_2727;N1NZK0;P36161; Nucleoporin NUP133 - NUP133	0	0	1	1	0	0	0	0	0	0	0	0	0	0	1	0	1	0	0	0	0
d1086	d1086.a1	d1086.a1.a1	Chassy_SC_2726;N1NVT8;Q3E7X9; 40S ribosomal protein S28-A - RPS28A	1	1	1	2	3	1	1	3	1	1	1	1	1	1	0	1	2	0	1	0	1
d1494	d1494.a1	d1494.a1.a1	Chassy_SC_2724;N1P737;P32783; mRNA cap guanine-N7 methyltransferase - ABD1	0	0	1	0	1	0	0	0	0	0	0	0	0	0	1	2	2	0	1	0	0
c471	c471.a1	c471.a1.a1	Chassy_SC_272;N1NYF4;P13298; Orotate phosphoribosyltransferase 1 - URA5	4	6	8	9	8	8	5	9	9	8	9	9	2	4	9	11	8	6	9	3	1
d1105	d1105.a1	d1105.a1.a1	Chassy_SC_2719;N1NZF5;Q05948; Uncharacterized SVF1-like protein YLR225C - YLR225C	1	1	1	1	1	1	0	1	3	2	1	2	0	0	3	1	1	2	1	0	0
d1449	d1449.a1	d1449.a1.a1	Chassy_SC_2717;N1P9V3;P53072; tRNA acetyltransferase TAN1 - TAN1	0	1	1	1	1	0	0	0	1	0	1	1	0	0	1	0	0	0	1	0	0
c527	c527.a1	c527.a1.a1	Chassy_SC_2716;N1P5J0;P05373; Delta-aminolevulinic acid dehydratase - HEM2	3	6	7	8	5	11	2	7	7	6	6	6	3	2	7	8	9	7	7	2	2
d1210	d1210.a1	d1210.a1.a1	Chassy_SC_2714;N1P1W9;P26755; Replication factor A protein 3 - RFA3	0	1	1	1	2	0	0	1	1	1	2	1	0	0	1	1	3	0	1	0	0
c386	c386.a1	c386.a1.a1	Chassy_SC_2713;N1P016;P32499; Nucleoporin NUP2 - NUP2	3	9	18	13	16	7	3	9	12	8	14	10	0	1	16	13	16	4	9	0	0
d1140	d1140.a1	d1140.a1.a1	Chassy_SC_2710;N1NX88;P53868; Alpha-1,2-mannosyltransferase ALG9 - ALG9	0	0	2	2	1	2	1	0	1	0	1	1	1	0	2	3	1	1	2	0	0
d1561	d1561.a1	d1561.a1.a1	Chassy_SC_271;N1NVL1;P06197; CDP-diacylglycerol--inositol 3-phosphatidyltransferase - PIS1	0	0	1	1	0	1	0	0	1	0	0	1	0	0	0	0	1	0	0	0	0
d1811	d1811.a1	d1811.a1.a1	Chassy_SC_2707;N1P5J5;P53066; Ankyrin repeat-containing protein YGL242C - YGL242C	0	1	0	0	0	0	0	0	0	0	1	0	0	0	0	0	0	0	0	0	0
c455	c455.a1	c455.a1.a1	Chassy_SC_2706;N1NYX0;Q04894; NADP-dependent alcohol dehydrogenase 6 - ADH6	3	7	4	12	9	6	4	5	4	17	7	8	6	5	5	7	8	6	19	4	4
d1428	d1428.a1	d1428.a1.a1	Chassy_SC_2705;N1PA47;P40056; Golgi to ER traffic protein 2 - GET2	0	0	1	1	1	0	0	0	2	0	0	1	0	0	0	0	2	1	0	0	0
c445	c445.a1	c445.a1.a1	Chassy_SC_2701;N1P3S6;P17649; 4-aminobutyrate aminotransferase - UGA1	4	9	10	7	10	11	4	8	12	10	10	11	2	1	10	10	7	7	9	1	0
d1658	d1658.a1	d1658.a1.a1	Chassy_SC_27;N1NW18;Q03020; Iron sulfur cluster assembly protein 1, mitochondrial - ISU1	0	0	0	1	0	0	0	0	0	1	1	0	0	0	0	0	0	0	1	0	0
d1070	d1070.a1	d1070.a1.a1	Chassy_SC_2698;N1P043;P09201; Fructose-1,6-bisphosphatase - FBP1	0	1	2	2	1	0	0	2	6	1	1	0	0	0	3	2	3	0	1	0	0
c446	c446.a1	c446.a1.a1	Chassy_SC_2696;N1P984;P25567; RNA-binding protein SRO9 - SRO9	1	9	11	9	9	10	1	8	12	10	11	11	0	1	11	10	10	9	10	0	0
c473	c473.a1	c473.a1.a1	Chassy_SC_2693;N1NVN1;P20606; Small COPII coat GTPase SAR1 - SAR1	3	9	8	8	9	8	3	8	8	9	8	9	3	3	8	10	10	6	9	2	3
c263	c263.a1	c263.a1.a1	Chassy_SC_269;N1PA43;P28240; Isocitrate lyase - ICL1	11	18	17	19	16	0	7	16	20	22	13	0	8	9	14	16	19	0	24	8	9
d1569	d1569.a1	d1569.a1.a1	Chassy_SC_2687;N1P1J6;P38690; Uncharacterized protein YHR033W - YHR033W	0	0	0	1	0	0	0	0	0	2	0	0	0	0	0	0	0	0	3	0	0
d1114	d1114.a1	d1114.a1.a1	Chassy_SC_2685;N1NYK0;P16622; Ferrochelatase, mitochondrial - HEM15	0	2	0	2	4	3	0	0	0	0	0	5	0	0	0	2	0	3	1	0	0
d1454	d1454.a1	d1454.a1.a1	Chassy_SC_2682;N1NXH6;P06786; DNA topoisomerase 2 - TOP2	0	0	0	1	0	0	0	0	0	2	0	1	0	0	0	0	3	0	2	0	0
d1931	d1931.a1	d1931.a1.a1	Chassy_SC_2680;N1NVV9;Q00776; AP-1 complex subunit mu-1-I - APM1	0	1	0	0	0	0	0	0	0	0	0	0	0	0	0	0	0	0	0	0	0
c244	c244.a1	c244.a1.a1	Chassy_SC_268;N1P8J9;P32449; Phospho-2-dehydro-3-deoxyheptonate aldolase, tyrosine-inhibited - ARO4	11	16	15	15	19	16	9	14	16	15	14	18	10	8	15	16	18	14	17	8	7
c764	c764.a2	c764.a2.a1	Chassy_SC_2678;N1P5Z3;Q12518; Epsin-1 - ENT1	1	1	2	0	2	1	0	1	6	0	3	2	0	1	4	2	6	1	1	1	0
c384	c384.a1	c384.a1.a1	Chassy_SC_2676;N1P7E7;P38205; Multisite-specific tRNA:(cytosine-C(5))-methyltransferase - NCL1	4	11	9	16	13	8	3	10	10	20	12	10	3	0	6	14	16	4	15	1	0
d1661	d1661.a1	d1661.a1.a1	Chassy_SC_2675;N1P2Q0;P36141; Putative redox protein FMP46, mitochondrial - FMP46	0	0	0	0	1	0	0	0	0	1	0	0	0	0	0	0	1	0	1	0	0
c978	c978.a1	c978.a1.a1	Chassy_SC_2673;N1NYJ8;P54837; Endoplasmic reticulum vesicle protein 25 - ERV25	0	2	3	2	2	2	0	2	3	2	3	2	0	0	2	2	3	2	2	0	0
d1160	d1160.a1	d1160.a1.a1	Chassy_SC_2672;N1NWU3;P89105; RNA polymerase-associated protein CTR9 - CTR9	0	1	2	0	0	2	0	0	4	1	0	3	0	0	1	2	3	0	1	0	0
d1716	d1716.a1	d1716.a1.a1	Chassy_SC_2670;N1P6Y6;P37304; Protein PAM1 - PAM1	0	0	0	0	0	0	0	0	0	0	0	0	0	0	0	1	2	0	0	0	0
c538	c538.a1	c538.a1.a1	Chassy_SC_2663;N1P9M1;P38694; Putative aldehyde dehydrogenase-like protein YHR039C - MSC7	4	7	5	5	5	11	5	5	4	5	3	14	1	3	6	8	8	8	5	2	2
d1438	d1438.a1	d1438.a1.a1	Chassy_SC_2661;N1NWV3;P39008; Poly(A) ribonuclease POP2 - POP2	0	0	1	1	1	0	0	1	1	0	1	0	0	0	1	0	2	0	0	0	0
c599	c599.a1	c599.a1.a1	Chassy_SC_2660;N1NYJ3;P23776; Glucan 1,3-beta-glucosidase I/II - EXG1	3	7	6	9	4	4	2	7	6	7	6	2	1	2	3	6	8	1	9	1	2
c128	c128.a1	c128.a1.a1	Chassy_SC_2658;N1P2L9;P38788; Ribosome-associated complex subunit SSZ1 - SSZ1	13	22	26	27	25	23	16	27	22	28	21	21	14	11	20	25	29	19	31	12	11
c808	c808.a1	c808.a1.a1	Chassy_SC_2656;N1P417;P46969; Ribulose-phosphate 3-epimerase - RPE1	0	5	4	8	4	1	0	2	2	3	6	3	0	0	2	2	7	0	3	0	0
c728	c728.a1	c728.a1.a1	Chassy_SC_2654;N1NZC3;P26754; Replication factor A protein 2 - RFA2	0	4	3	4	4	4	0	6	4	4	4	6	0	0	2	5	6	2	7	0	0
c831	c831.a1	c831.a1.a1	Chassy_SC_2652;N1P8M7;P81449; ATP synthase subunit e, mitochondrial - TIM11	3	2	3	2	2	2	3	3	3	2	2	3	2	2	2	2	3	3	3	2	1
d1328	d1328.a1	d1328.a1.a1	Chassy_SC_2651;N1P873;P38069; Alpha-1,2-mannosyltransferase MNN2 - MNN2	0	1	1	0	1	1	0	0	1	0	1	2	0	0	0	1	3	0	0	0	0
d1434	d1434.a1	d1434.a1.a1	Chassy_SC_2648;N1NX35;Q08558; Delta(3,5)-Delta(2,4)-dienoyl-CoA isomerase - DCI1	0	0	2	1	0	0	0	1	0	1	0	0	0	0	0	1	1	0	2	0	0
c907	c907.a1	c907.a1.a1	Chassy_SC_2647;N1PAK9;P06782; Carbon catabolite-derepressing protein kinase - SNF1	0	2	4	3	4	3	0	2	1	3	2	2	0	0	2	4	4	2	3	0	0
d1862	d1862.a1	d1862.a1.a1	Chassy_SC_2646;N1P3K8;P53166; ATP-dependent RNA helicase MRH4, mitochondrial - MRH4	0	0	1	0	0	0	0	0	0	0	0	1	0	0	0	0	0	0	0	0	0
d2000	d2000.a1	d2000.a1.a1	Chassy_SC_2645;N1P4X9;Q03941; Dephospho-CoA kinase CAB5 - CAB5	0	0	1	0	0	0	0	0	0	0	0	0	0	0	0	0	0	0	0	0	0
c418	c418.a1	c418.a1.a1	Chassy_SC_2640;N1P7H2;Q01560; Nucleolar protein 3 - NPL3	4	10	8	10	9	9	5	8	12	10	11	11	5	5	7	9	10	5	12	4	4
c908	c908.a1	c908.a1.a1	Chassy_SC_2638;N1P0S4;P14164; ARS-binding factor 1 - ABF1	0	2	6	2	2	1	1	2	5	2	4	1	0	1	5	2	3	0	1	0	0
c325	c325.a1	c325.a1.a1	Chassy_SC_2626;N1P141;P38715; NADPH-dependent aldose reductase GRE3 - GRE3	5	11	12	20	15	6	6	12	15	23	14	4	4	2	14	14	14	3	25	2	4
b15	b15.a2	b15.a2.a1	Chassy_SC_2625;N1NZR0;P52910; Acetyl-coenzyme A synthetase 2 - ACS2	28	34	32	36	29	34	28	33	33	34	40	37	25	22	28	35	42	30	45	26	26
d2031	d2031.a1	d2031.a1.a1	Chassy_SC_2624;N1NXM2;P40339; Replication factor C subunit 4 - RFC4	0	0	0	0	0	0	0	0	0	0	0	0	0	0	0	0	0	0	1	0	0
c613	c613.a1	c613.a1.a1	Chassy_SC_2619;N1P3X8;P53250; Twinfilin-1 - TWF1	1	6	4	4	8	5	2	6	6	8	6	5	1	1	4	5	5	4	9	1	0
c725	c725.a1	c725.a1.a1	Chassy_SC_2618;N1NXN6;P32588; Nuclear and cytoplasmic polyadenylated RNA-binding protein PUB1 - PUB1	1	4	3	3	4	5	1	2	2	6	4	4	1	1	4	4	5	4	6	1	1
c923	c923.a1	c923.a1.a1	Chassy_SC_2615;N1NZ74;P25045; Serine palmitoyltransferase 1 - LCB1	0	5	4	3	0	5	1	2	2	4	0	5	1	1	0	0	2	1	3	0	0
c334	c334.a1	c334.a1.a1	Chassy_SC_2614;N1P229;P32288; Glutamine synthetase - GLN1	8	9	6	10	14	14	9	9	9	10	16	15	10	9	8	14	9	11	14	8	8
d1030	d1030.a1	d1030.a1.a1	Chassy_SC_261;N1NXE7;P29478; Signal recognition particle subunit SEC65 - SEC65	0	2	1	1	3	1	0	1	2	3	2	1	0	1	1	1	2	2	3	1	0
d1263	d1263.a1	d1263.a1.a1	Chassy_SC_2609;N1P3I6;P47123; Nuclear import protein MOG1 - MOG1	0	0	0	4	0	0	0	2	3	0	0	0	0	0	0	1	4	0	1	0	0
c996	c996.a1	c996.a1.a1	Chassy_SC_2608;N1NZN0;P37370; Verprolin - VRP1	0	1	6	3	1	1	1	1	1	2	3	2	0	0	4	1	3	1	1	0	0
c215	c215.a1	c215.a1.a1	Chassy_SC_2606;N1NW72;Q12428; Probable 2-methylcitrate dehydratase - PDH1	13	15	22	19	20	7	13	17	19	26	18	10	9	12	20	18	17	6	27	10	8
c699	c699.a1	c699.a1.a1	Chassy_SC_2604;N1P853;P38260; Hsp70 nucleotide exchange factor FES1 - FES1	3	5	5	2	5	3	2	6	6	4	3	4	1	2	5	6	6	1	3	0	1
d1734	d1734.a1	d1734.a1.a1	Chassy_SC_260;N1P9M8;P38341; MICOS complex subunit MIC12 - MIC12	0	0	1	0	0	0	0	0	1	0	0	0	0	0	0	0	1	0	0	0	0
c129	c129.a1	c129.a1.a1	Chassy_SC_2598;N1P011;P39522; Dihydroxy-acid dehydratase, mitochondrial - ILV3	12	26	20	26	26	28	11	28	22	24	25	34	9	6	18	21	37	24	22	11	9
c107	c107.a1	c107.a1.a1	Chassy_SC_2595;N1NW09;P26637; Leucine--tRNA ligase, cytoplasmic - CDC60	21	26	26	25	24	26	20	26	26	29	24	32	24	19	25	28	28	24	23	12	18
c249	c249.a1	c249.a1.a1	Chassy_SC_2594;N1P5U5;P38625; GMP synthase [glutamine-hydrolyzing] - GUA1	7	18	10	17	18	18	6	16	17	19	18	18	8	7	13	17	16	13	18	6	6
d1310	d1310.a1	d1310.a1.a1	Chassy_SC_2592;N1P4J2;P38792; Exosome complex component RRP4 - RRP4	0	1	1	0	0	1	0	1	0	1	0	2	0	0	1	0	4	0	1	0	0
d1584	d1584.a1	d1584.a1.a1	Chassy_SC_259;N1P271;P15790; Casein kinase II subunit alpha - CKA1	0	0	0	0	0	2	0	1	0	1	0	1	0	0	0	0	1	0	0	0	0
d1169	d1169.a1	d1169.a1.a1	Chassy_SC_2589;N1NWS9;P22579; Transcriptional regulatory protein SIN3 - SIN3	0	3	1	1	0	0	0	0	2	1	2	1	0	0	2	1	4	0	1	0	0
d2005	d2005.a1	d2005.a1.a1	Chassy_SC_2587;N1NWX0;P36520; 54S ribosomal protein L10, mitochondrial - MRPL10	0	0	0	0	0	0	0	0	0	0	1	0	0	0	0	0	0	0	0	0	0
d1253	d1253.a1	d1253.a1.a1	Chassy_SC_2582;N1NX63;Q99316; Protein disulfide isomerase MPD2 - MPD2	0	1	0	1	4	0	0	3	2	0	1	0	0	0	1	0	1	0	1	0	0
d1185	d1185.a1	d1185.a1.a1	Chassy_SC_2580;N1P4C4;P53550; m7GpppN-mRNA hydrolase - DCP2	0	2	1	1	0	1	1	1	3	1	0	2	0	0	1	0	3	0	1	0	0
c359	c359.a1	c359.a1.a1	Chassy_SC_258;N1NWI0;P17555; Adenylyl cyclase-associated protein - SRV2	8	9	13	9	14	7	11	11	12	8	10	7	10	8	9	9	13	6	10	8	7
d1638	d1638.a1	d1638.a1.a1	Chassy_SC_2579;N1P094;P32774; Transcription initiation factor IIA subunit 2 - TOA2	0	0	0	1	0	1	0	0	0	0	1	1	0	0	0	0	1	0	0	0	0
c874	c874.a1	c874.a1.a1	Chassy_SC_2576;N1P6E8;CENPK specific;No description in SC288c, annotation and gene name in CENPK: Etr1p -CENPK1137D_4572	2	2	3	4	4	1	1	2	2	0	2	1	2	2	2	3	3	0	3	3	2
c913	c913.a1	c913.a1.a1	Chassy_SC_2575;N1P7U9;Q07589; Uncharacterized protein YDL144C - YDL144C	0	3	4	5	2	2	0	3	5	1	2	1	0	1	2	1	3	2	3	0	0
d1029	d1029.a1	d1029.a1.a1	Chassy_SC_2573;N1P800;P23833; Protein SCO1, mitochondrial - SCO1	0	1	3	1	1	2	1	2	3	1	3	2	0	0	1	0	4	2	1	0	0
d1448	d1448.a1	d1448.a1.a1	Chassy_SC_2572;N1P491;P10363; DNA primase small subunit - PRI1	0	0	1	2	1	0	0	0	0	2	2	0	0	0	0	0	1	0	0	0	0
d1347	d1347.a1	d1347.a1.a1	Chassy_SC_2571;N1P3N7;P32317; Protein AFG1 - AFG1	0	0	2	0	0	0	0	1	2	0	0	2	0	0	1	1	1	1	1	0	0
d1684	d1684.a1	d1684.a1.a1	Chassy_SC_2570;N1P196;P47037; Structural maintenance of chromosomes protein 3 - SMC3	0	0	0	0	0	0	0	1	0	0	1	0	0	0	0	0	2	0	0	0	0
d1325	d1325.a1	d1325.a1.a1	Chassy_SC_2563;N1P1L7;P40348; Replication factor C subunit 2 - RFC2	0	0	1	1	2	0	0	2	1	1	0	0	0	0	2	0	1	0	1	0	0
c184	c184.a3	c184.a3.a1	Chassy_SC_256;N1NW67;P52917; Vacuolar protein sorting-associated protein 4 - VPS4	0	0	0	2	0	0	0	0	3	0	3	0	0	0	1	3	3	0	2	0	0
d1234	d1234.a1	d1234.a1.a1	Chassy_SC_2559;N1NWD9;P22517; Calcium/calmodulin-dependent protein kinase II - CMK2	0	0	0	0	0	6	0	1	3	0	0	3	0	0	1	0	0	2	0	0	0
d1148	d1148.a1	d1148.a1.a1	Chassy_SC_2558;N1P616;P25626; 54S ribosomal protein IMG1, mitochondrial - IMG1	0	1	1	1	2	2	0	2	1	1	2	2	0	0	1	1	1	0	3	0	0
c209	c209.a1	c209.a1.a1	Chassy_SC_2556;N1P541;P38707; Asparagine--tRNA ligase, cytoplasmic - DED81	12	19	18	18	16	18	14	17	16	18	17	21	11	12	15	15	24	13	17	6	14
d1960	d1960.a1	d1960.a1.a1	Chassy_SC_2555;N1P7C4;P01097; ATPase inhibitor, mitochondrial - INH1	0	0	0	0	0	0	0	0	0	0	1	0	0	0	0	0	0	0	0	0	0
d1053	d1053.a1	d1053.a1.a1	Chassy_SC_2551;N1NXA9;P40341; Mitochondrial respiratory chain complexes assembly protein YTA12 - YTA12	0	1	0	3	1	2	0	1	1	2	1	0	0	0	0	0	2	1	2	0	0
c590	c590.a1	c590.a1.a1	Chassy_SC_2549;N1NVX5;Q99383; Nuclear polyadenylated RNA-binding protein 4 - HRP1	2	6	8	3	7	3	3	6	8	3	6	4	3	2	7	4	12	2	5	3	1
c986	c986.a1	c986.a1.a1	Chassy_SC_2547;N1P363;P38758; Putative oxidoreductase TDA3 - TDA3	0	2	5	1	4	1	0	3	5	1	1	0	0	0	2	2	4	0	2	0	0
c865	c865.a1	c865.a1.a1	Chassy_SC_2546;N1PA86;P19881; 4-nitrophenylphosphatase - PHO13	0	2	1	3	4	4	0	5	1	4	3	2	0	0	2	2	4	3	5	0	0
c110	c110.a1	c110.a1.a1	Chassy_SC_2544;N1P147;P32454; Aminopeptidase 2, mitochondrial - APE2	13	25	30	19	22	15	9	20	26	13	26	16	6	6	28	22	29	11	13	8	5
c252	c252.a1	c252.a1.a1	Chassy_SC_2543;N1P3K3;P05737; 60S ribosomal protein L7-A - RPL7A	12	11	16	17	22	9	11	15	13	17	18	11	7	7	15	13	12	7	15	8	9
c751	c751.a1	c751.a1.a1	Chassy_SC_2542;N1P167;P38840; Aromatic amino acid aminotransferase 2 - ARO9	3	6	6	3	2	0	3	5	7	3	2	0	1	1	6	3	5	0	3	1	0
c250	c250.a1	c250.a1.a1	Chassy_SC_2541;N1NZC0;P21801; Succinate dehydrogenase [ubiquinone] iron-sulfur subunit, mitochondrial - SDH2	12	12	14	16	14	14	11	14	13	14	16	14	10	10	11	14	17	12	22	12	12
d1334	d1334.a1	d1334.a1.a1	Chassy_SC_2536;N1P1X1;P53064; RNA polymerase-associated protein RTF1 - RTF1	0	1	0	0	1	1	0	1	1	1	1	0	0	0	1	1	1	1	1	0	0
d1810	d1810.a1	d1810.a1.a1	Chassy_SC_2535;N1P0X9;P40498; U3 small nucleolar RNA-associated protein 25 - UTP25	0	0	0	1	0	0	0	0	0	0	0	0	0	0	0	0	1	0	0	0	0
d1292	d1292.a1	d1292.a1.a1	Chassy_SC_2530;N1NW00;Q12341; Histone acetyltransferase type B catalytic subunit - HAT1	0	1	2	3	0	0	0	0	1	1	0	0	0	0	2	1	0	0	2	0	0
d2032	d2032.a1	d2032.a1.a1	Chassy_SC_2523;N1P8N9;P47107;|reversed Uncharacterized protein YJR039W - YJR039W	0	0	0	0	0	0	0	0	0	0	0	1	0	0	0	0	0	0	0	0	0
d1219	d1219.a1	d1219.a1.a1	Chassy_SC_2522;N1P681;Q99190; Very-long-chain enoyl-CoA reductase - TSC13	1	2	1	2	1	1	1	1	1	1	0	2	0	0	2	0	0	0	0	0	0
d1602	d1602.a1	d1602.a1.a1	Chassy_SC_2521;N1P255;Q07979; Chromatin structure-remodeling complex protein RSC58 - RSC58	0	0	0	0	0	0	0	1	0	0	1	1	0	0	1	0	0	1	0	0	0
d1480	d1480.a1	d1480.a1.a1	Chassy_SC_252;N1P981;P15367; Signal peptidase complex catalytic subunit SEC11 - SEC11	0	0	1	0	1	0	0	1	1	0	0	0	0	0	0	1	2	0	1	0	0
d1001	d1001.a1	d1001.a1.a1	Chassy_SC_2519;N1P4B1;P53914; RNA cytidine acetyltransferase - KRE33	0	3	1	1	3	0	0	0	2	1	3	3	0	0	3	1	10	0	0	0	0
d1151	d1151.a1	d1151.a1.a1	Chassy_SC_2516;N1NXB6;Q02642; Nascent polypeptide-associated complex subunit beta-1 - EGD1	0	3	0	2	2	2	0	0	1	0	3	1	0	0	0	1	3	1	2	0	0
d1660	d1660.a1	d1660.a1.a1	Chassy_SC_2513;N1P249;CENPK specific;No description in SC288c, annotation and gene name in CENPK: Uncharacterized protein -CENPK1137D_1521	0	0	0	2	0	0	0	0	0	1	0	0	0	0	0	0	0	0	1	0	0
d1773	d1773.a1	d1773.a1.a1	Chassy_SC_2510;N1P0G6;P39515; Mitochondrial import inner membrane translocase subunit TIM17 - TIM17	0	0	0	0	0	0	0	0	0	1	0	1	0	0	0	0	0	0	1	0	0
c917	c917.a2	c917.a2.a1	Chassy_SC_2508;N1P5T1;P23594; Serine/threonine-protein phosphatase PP2A-1 catalytic subunit - PPH21	1	1	1	1	1	2	1	1	1	1	1	2	0	0	1	1	2	1	2	0	0
d1596	d1596.a1	d1596.a1.a1	Chassy_SC_2507;N1P4R5;P13130; Sporulation-specific wall maturation protein - SPS100	0	1	0	0	1	0	0	1	0	0	2	0	0	0	0	1	0	0	0	0	0
d1027	d1027.a1	d1027.a1.a1	Chassy_SC_2502;N1P2F6;Q86ZR7; Putative uncharacterized hydrolase YKL033W-A - YKL033W-A	0	5	3	3	2	0	0	3	2	1	3	0	0	0	2	2	3	0	0	0	0
d1102	d1102.a1	d1102.a1.a1	Chassy_SC_2501;N1P1T6;P53140; Protein RMD9, mitochondrial - RMD9	0	2	3	1	1	2	0	1	2	1	3	0	0	0	3	1	2	0	1	0	0
c420	c420.a2	c420.a2.a1	Chassy_SC_2500;N1P561;P40106; Glycerol-1-phosphate phosphohydrolase 2 - GPP2	2	2	2	14	4	2	3	3	2	9	3	2	3	3	2	2	3	2	9	3	2
c281	c281.a1	c281.a1.a1	Chassy_SC_25;N1P905;P36775; Lon protease homolog, mitochondrial - PIM1	7	14	17	15	13	11	5	15	18	18	14	12	5	4	16	9	23	10	24	3	4
c752	c752.a1	c752.a1.a1	Chassy_SC_2495;N1NWE8;P40159; Uncharacterized protein YNL208W - YNL208W	1	2	6	2	5	2	1	3	3	4	6	3	1	1	5	5	4	2	2	1	1
b40	b40.a1	b40.a1.a1	Chassy_SC_2492;N1P377;P11154; Pyruvate carboxylase 1 - PYC1	22	39	44	42	40	71	26	36	39	52	38	80	27	21	36	38	47	56	52	25	23
d1318	d1318.a1	d1318.a1.a1	Chassy_SC_2491;N1P2T4;P32461; 2-(3-amino-3-carboxypropyl)histidine synthase subunit 2 - DPH2	0	1	2	2	0	0	0	2	0	0	1	1	0	0	1	1	0	0	1	0	0
c554	c554.a1	c554.a1.a1	Chassy_SC_249;N1P4Z2;P39966; Protein phosphatase 2C homolog 2 - PTC2	1	7	4	3	6	5	1	5	4	2	5	6	0	0	3	6	5	2	4	0	0
d1156	d1156.a1	d1156.a1.a1	Chassy_SC_2485;N1P8M9;P38349; UBX domain-containing protein 7 - UBX7	0	1	2	2	2	0	0	1	3	1	1	1	0	0	1	2	1	0	2	0	0
c919	c919.a1	c919.a1.a1	Chassy_SC_248;N1PA81;P89886; Translation machinery-associated protein 20 - TMA20	0	3	1	4	2	2	0	4	4	2	4	3	0	0	4	2	1	1	3	0	0
c665	c665.a1	c665.a1.a1	Chassy_SC_2479;N1P452;P40165; NAD(P)H-hydrate epimerase - YNL200C	1	3	10	1	7	2	0	7	10	2	8	3	0	0	8	6	7	1	4	0	0
d1370	d1370.a1	d1370.a1.a1	Chassy_SC_2478;N1P3J0;P39984; Histone acetyltransferase type B subunit 2 - HAT2	0	1	1	1	1	0	0	1	1	0	1	0	0	0	1	1	0	0	2	0	0
c199	c199.a1	c199.a1.a1	Chassy_SC_2477;N1P0L7;P47912; Long-chain-fatty-acid--CoA ligase 4 - FAA4	15	16	23	16	12	19	15	16	19	18	13	18	13	12	20	18	19	15	15	12	9
d1601	d1601.a1	d1601.a1.a1	Chassy_SC_2475;N1P2C9;P32900;|reversed Protein SKG6 - SKG6	1	1	0	1	0	1	0	0	0	0	1	0	0	0	0	0	0	0	0	0	0
c671	c671.a3	c671.a3.a1	Chassy_SC_2471;N1P748;P39962; Casein kinase I homolog 3 - YCK3	1	1	1	1	3	0	0	0	1	2	0	1	0	0	0	1	1	0	1	0	0
d1422	d1422.a1	d1422.a1.a1	Chassy_SC_247;N1P6U6;P38116; ADP-ribosylation factor-like protein 1 - ARL1	0	1	1	0	0	0	0	1	1	0	1	1	0	0	1	1	1	0	0	0	0
c753	c753.a1	c753.a1.a1	Chassy_SC_2467;N1P472;P53879; GTP-binding protein RHO5 - RHO5	0	2	8	9	4	0	0	2	5	5	3	0	0	0	7	2	4	0	8	0	0
d1096	d1096.a1	d1096.a1.a1	Chassy_SC_2466;N1P1W3;P46989; Autophagy-related protein 27 - ATG27	0	2	2	2	2	1	1	1	2	2	1	1	0	0	2	2	1	1	1	0	0
c592	c592.a1	c592.a1.a1	Chassy_SC_2461;N1P5P3;Q3E792; 40S ribosomal protein S25-A - RPS25A	4	5	6	5	6	3	4	5	6	5	6	4	4	4	5	5	5	3	5	3	4
c299	c299.a1	c299.a1.a1	Chassy_SC_2460;N1NXW3;Q02326; 60S ribosomal protein L6-A - RPL6A	8	10	12	12	14	6	7	11	13	10	13	6	5	3	12	12	13	3	11	4	4
d1352	d1352.a1	d1352.a1.a1	Chassy_SC_2459;N1P734;P40066; Nucleoporin GLE2 - GLE2	0	0	0	1	0	0	0	0	1	1	0	1	0	0	1	1	2	1	2	0	0
d1967	d1967.a1	d1967.a1.a1	Chassy_SC_2456;N1NWC4;Q99247; Uncharacterized WD repeat-containing protein YOL087C - YOL087C	0	0	0	0	1	0	0	0	0	0	0	0	0	0	0	0	0	0	0	0	0
d1184	d1184.a1	d1184.a1.a1	Chassy_SC_2453;N1NXH4;Q12402; Protein YOP1 - YOP1	1	0	1	0	2	1	0	1	2	0	1	0	0	1	1	1	1	2	1	1	1
d1857	d1857.a1	d1857.a1.a1	Chassy_SC_2452;N1P8S0;CENPK specific;No description in SC288c, annotation and gene name in CENPK: Lsm6p -CENPK1137D_4205	0	0	0	0	1	0	0	0	0	0	0	0	0	0	0	0	1	0	0	0	0
d2002	d2002.a1	d2002.a1.a1	Chassy_SC_245;N1P527;Q03786; Probable gluconokinase - YDR248C	0	1	0	0	0	0	0	0	0	0	0	0	0	0	0	0	0	0	0	0	0
c438	c438.a1	c438.a1.a1	Chassy_SC_2445;N1P0S5;P54783; D-arabinono-1,4-lactone oxidase - ALO1	5	12	11	9	9	10	3	9	10	8	6	10	2	2	9	12	12	8	7	1	2
b11	b11.a3	b11.a3.a1	Chassy_SC_244;N1P0X7;P16474; 78 kDa glucose-regulated protein homolog - KAR2	20	31	30	34	32	33	22	24	35	23	30	30	17	22	31	28	31	23	31	19	16
b10	b10.a2	b10.a2.a1	Chassy_SC_2437;N1P4P1;P04807; Hexokinase-2 - HXK2	12	17	21	32	31	29	10	21	22	37	27	26	12	11	15	27	22	24	38	9	8
d1757	d1757.a1	d1757.a1.a1	Chassy_SC_2436;N1P3T2;P25515; V-type proton ATPase subunit c - VMA3	0	0	0	1	1	0	0	0	0	0	0	0	0	0	0	1	0	0	0	0	0
b44	b44.a2	b44.a2.a1	Chassy_SC_2432;N1P767;P37292; Serine hydroxymethyltransferase, mitochondrial - SHM1	9	17	16	16	18	7	10	19	12	14	19	8	9	6	14	17	22	5	17	9	5
c719	c719.a1	c719.a1.a1	Chassy_SC_243;N1NX84;P22133; Malate dehydrogenase, cytoplasmic - MDH2	1	6	5	8	3	0	0	5	6	5	4	0	0	1	5	4	9	0	4	0	1
c453	c453.a1	c453.a1.a1	Chassy_SC_2429;N1P284;P32468; Cell division control protein 12 - CDC12	3	8	11	11	10	7	2	8	11	8	8	8	1	3	12	9	11	6	10	1	2
d1103	d1103.a1	d1103.a1.a1	Chassy_SC_2428;N1P5H1;P32611; 54S ribosomal protein RML2, mitochondrial - RML2	0	1	1	1	2	1	0	2	2	2	1	2	0	1	1	2	1	1	2	0	0
d1686	d1686.a1	d1686.a1.a1	Chassy_SC_2424;N1P2B4;Q06107; Uncharacterized TLC domain-containing protein YPR114W - YPR114W	0	0	0	0	0	1	0	0	0	0	0	1	0	0	0	1	0	0	1	0	0
d1279	d1279.a1	d1279.a1.a1	Chassy_SC_2419;N1NXN3;P20107; Zinc/cadmium resistance protein - ZRC1	0	0	1	1	1	1	0	1	1	1	1	1	0	1	1	1	1	0	1	0	0
d1282	d1282.a1	d1282.a1.a1	Chassy_SC_2418;N1P8W5;P31384; Glucose-repressible alcohol dehydrogenase transcriptional effector - CCR4	0	0	1	1	1	3	0	1	1	3	0	1	0	0	0	0	2	0	0	0	0
d1500	d1500.a1	d1500.a1.a1	Chassy_SC_2412;N1P8S7;P38199; Heterogeneous nuclear rnp K-like protein 2 - HEK2	0	0	0	0	0	2	0	0	0	0	0	3	0	0	0	0	1	0	2	0	0
d1125	d1125.a1	d1125.a1.a1	Chassy_SC_2411;N1P750;Q06178; Nicotinamide/nicotinic acid mononucleotide adenylyltransferase 1 - NMA1	0	0	1	1	1	1	0	1	1	4	1	0	0	0	1	1	1	0	4	0	0
d1423	d1423.a1	d1423.a1.a1	Chassy_SC_241;N1NW04;P30665; DNA replication licensing factor MCM4 - MCM4	0	0	1	0	0	0	0	2	1	0	1	0	0	0	0	2	2	0	0	0	0
c398	c398.a1	c398.a1.a1	Chassy_SC_2408;N1P1K8;P42943; T-complex protein 1 subunit eta - CCT7	9	9	13	10	8	8	9	9	9	12	11	6	6	6	6	12	10	3	8	7	4
d1089	d1089.a1	d1089.a1.a1	Chassy_SC_2404;N1P3Y3;P12754; Translation initiation factor eIF-2B subunit delta - GCD2	0	1	2	2	1	1	0	2	2	2	2	0	0	0	3	1	2	0	3	0	0
d1226	d1226.a1	d1226.a1.a1	Chassy_SC_2402;N1PA65;P32610; V-type proton ATPase subunit D - VMA8	0	0	0	2	2	0	0	2	1	0	2	1	0	0	2	1	2	1	0	0	0
c523	c523.a1	c523.a1.a1	Chassy_SC_2401;N1P9J4;P38295; Medium-chain fatty acid ethyl ester synthase/esterase 2 - EHT1	1	8	4	5	9	10	2	10	5	4	8	11	3	1	4	9	12	7	7	1	2
d2014	d2014.a1	d2014.a1.a1	Chassy_SC_2400;N1P882;P38072; Protein SCO2, mitochondrial - SCO2	0	0	0	0	0	0	0	0	0	0	0	1	0	0	0	0	0	0	0	0	0
c172	c172.a2	c172.a2.a1	Chassy_SC_2397;N1P0N1;P38426; Trehalose synthase complex regulatory subunit TPS3 - TPS3	2	8	10	8	5	7	3	4	9	8	3	7	1	2	11	3	12	2	6	1	1
c185	c185.a1	c185.a1.a1	Chassy_SC_2395;N1NXA5;P07246; Alcohol dehydrogenase 3, mitochondrial - ADH3	16	15	17	14	18	20	13	20	20	22	19	23	10	11	19	19	20	15	20	11	13
d1405	d1405.a1	d1405.a1.a1	Chassy_SC_2393;N1P1F5;Q08979; Kelch repeat-containing protein 3 - KEL3	0	0	2	1	0	1	0	0	0	0	0	2	0	0	0	0	3	0	1	0	0
d1834	d1834.a1	d1834.a1.a1	Chassy_SC_2392;N1P0N8;P32388; 54S ribosomal protein MRP49, mitochondrial - MRP49	0	0	0	0	0	0	0	0	0	0	0	0	0	0	0	0	0	0	2	0	0
c109	c109.a1	c109.a1.a1	Chassy_SC_2390;N1NXG3;P06208; 2-isopropylmalate synthase - LEU4	15	35	27	24	31	22	16	31	28	24	29	17	13	15	26	33	32	14	28	19	18
c997	c997.a1	c997.a1.a1	Chassy_SC_239;N1PAD7;P15565; tRNA (guanine(26)-N(2))-dimethyltransferase, mitochondrial - TRM1	0	2	3	1	1	5	0	1	2	0	1	4	0	0	2	3	4	0	3	0	0
d1235	d1235.a1	d1235.a1.a1	Chassy_SC_2389;N1NWW5;Q92331; Vacuolar protein sorting-associated protein 5 - VPS5	0	1	2	2	2	0	0	0	3	0	1	0	0	0	3	0	0	0	2	0	0
d1873	d1873.a1	d1873.a1.a1	Chassy_SC_2387;N1P6C9;P18900; Hexaprenyl pyrophosphate synthase, mitochondrial - COQ1	0	0	0	0	0	0	0	0	0	0	0	1	0	0	0	0	0	0	1	0	0
c479	c479.a2	c479.a2.a1	Chassy_SC_2386;N1NWK3;P01119; Ras-like protein 1 - RAS1	0	1	0	1	1	2	0	0	1	1	1	4	0	0	1	1	1	1	1	0	0
d1345	d1345.a1	d1345.a1.a1	Chassy_SC_2384;N1PAC3;Q12355; Cell wall mannoprotein PST1 - PST1	0	0	0	1	1	0	0	1	0	2	2	0	0	0	1	1	2	0	1	0	0
c479	c479.a1	c479.a1.a1	Chassy_SC_238;N1NXG7;P01120; Ras-like protein 2 - RAS2	3	7	7	6	9	5	2	10	12	6	9	8	1	3	8	8	12	6	9	2	2
c985	c985.a1	c985.a1.a1	Chassy_SC_2379;N1PAQ4;Q96VH5; MICOS complex subunit MIC10 - MIC10	0	2	3	3	2	0	0	2	2	2	3	0	0	1	3	3	3	1	3	0	0
b29	b29.a1	b29.a1.a1	Chassy_SC_2377;N1NYP1;P06168; Ketol-acid reductoisomerase, mitochondrial - ILV5	31	57	46	47	65	71	30	67	46	55	66	76	38	35	42	58	70	60	61	37	31
d1076	d1076.a1	d1076.a1.a1	Chassy_SC_2375;N1P5T8;P12686; 37S ribosomal protein MRP13, mitochondrial - MRP13	0	1	1	1	2	1	0	2	1	3	2	3	0	0	1	1	3	0	3	0	0
d1182	d1182.a1	d1182.a1.a1	Chassy_SC_2372;N1NYK9;Q12164; Pore membrane protein of 33 kDa - POM33	1	0	2	2	2	0	0	0	3	0	1	0	0	0	2	2	2	0	0	0	1
d1937	d1937.a1	d1937.a1.a1	Chassy_SC_2367;N1P580;P53115; Putative DNA helicase INO80 - INO80	0	0	0	0	0	1	0	0	0	0	0	0	0	0	0	0	0	0	0	0	0
d1708	d1708.a1	d1708.a1.a1	Chassy_SC_2366;N1P1T4;P25335; Allantoicase - DAL2	0	0	0	0	1	0	0	0	0	0	1	0	0	0	0	1	0	0	0	0	0
c552	c552.a1	c552.a1.a1	Chassy_SC_2363;N1P6K5;Q03862; Probable metalloprotease ARX1 - ARX1	4	5	5	5	6	6	4	6	5	9	6	9	3	2	5	6	7	6	9	3	1
d1947	d1947.a1	d1947.a1.a1	Chassy_SC_2361;N1NWM3;Q12486; Putative uncharacterized hydrolase YOR131C - YOR131C	0	0	0	0	0	0	0	0	1	0	0	0	0	0	0	0	0	0	0	0	0
d1229	d1229.a1	d1229.a1.a1	Chassy_SC_2360;N1P9U3;P39705; Nucleoporin NUP60 - NUP60	0	0	4	1	2	1	0	0	0	0	2	1	0	0	0	1	1	2	1	0	0
c921	c921.a1	c921.a1.a1	Chassy_SC_2354;N1PA89;P25037; Ubiquitin carboxyl-terminal hydrolase 1 - UBP1	1	1	3	4	1	2	1	2	2	2	1	2	1	1	3	1	2	2	5	1	1
c452	c452.a1	c452.a1.a1	Chassy_SC_2346;N1NZK2;P32835; GTP-binding nuclear protein GSP1/CNR1 - GSP1	7	8	7	6	8	5	7	6	6	7	7	6	8	5	6	7	7	4	7	6	7
d2022	d2022.a1	d2022.a1.a1	Chassy_SC_2344;N1P6A6;P41910; Repressor of RNA polymerase III transcription MAF1 - MAF1	0	0	1	0	0	0	0	0	0	0	0	0	0	0	0	0	0	0	0	0	0
d1187	d1187.a1	d1187.a1.a1	Chassy_SC_2342;N1P2S5;P53337; ER-derived vesicles protein ERV29 - ERV29	1	2	2	0	0	0	2	0	2	0	0	1	0	1	2	0	2	1	1	1	0
d1595	d1595.a1	d1595.a1.a1	Chassy_SC_2334;N1P1C3;P38883; Pre-rRNA-processing protein RIX1 - RIX1	0	1	0	2	0	0	0	0	0	0	0	1	0	0	0	1	1	0	0	0	0
c454	c454.a1	c454.a1.a1	Chassy_SC_2331;N1NZ10;P48589; 40S ribosomal protein S12 - RPS12	3	8	7	10	10	9	3	10	7	10	7	9	5	5	7	9	11	6	9	3	2
c979	c979.a1	c979.a1.a1	Chassy_SC_233;N1NW08;Q12028; AP-1 complex subunit gamma-1 - APL4	1	2	2	2	2	2	1	0	3	3	1	5	0	0	2	2	3	1	2	0	0
d1356	d1356.a1	d1356.a1.a1	Chassy_SC_2328;N1P8A0;P35996; 54S ribosomal protein L38, mitochondrial - MRPL38	0	0	0	1	2	1	0	2	0	1	0	0	0	0	0	1	2	0	1	0	0
c275	c275.a1	c275.a1.a1	Chassy_SC_2325;N1P069;P39516; 40S ribosomal protein S14-B - RPS14B	8	12	15	14	19	14	11	11	11	14	17	11	6	8	12	14	14	8	19	10	6
c734	c734.a1	c734.a1.a1	Chassy_SC_2324;N1NYU7;P07280; 40S ribosomal protein S19-A - RPS19A	2	6	4	5	7	3	0	3	3	3	6	3	1	0	2	4	3	2	5	1	1
d1453	d1453.a1	d1453.a1.a1	Chassy_SC_2322;N1P2H9;Q06624; DNA damage tolerance protein RHC31 - AOS1	0	0	0	0	2	1	0	1	0	1	0	0	0	0	0	2	1	0	1	0	0
d1142	d1142.a1	d1142.a1.a1	Chassy_SC_2319;N1P854;P35179; Protein transport protein SSS1 - SSS1	1	1	1	1	1	2	1	1	1	1	0	1	1	1	1	1	2	1	1	0	1
d1100	d1100.a1	d1100.a1.a1	Chassy_SC_2312;N1P9Q9;Q3E756; UPF0768 protein YBL029C-A - YBL029C-A	1	1	2	1	2	1	1	1	2	1	1	1	1	1	2	1	1	0	1	1	0
d1186	d1186.a2	d1186.a2.a1	Chassy_SC_2310;N1P4L4;CENPK specific;No description in SC288c, annotation and gene name in CENPK: Snz3p -CENPK1137D_3361	0	2	0	4	0	0	0	2	0	1	2	0	0	0	0	0	2	0	2	0	0
d1754	d1754.a1	d1754.a1.a1	Chassy_SC_231;N1PAD2;Q03833; Transcriptional activator/repressor GIS1 - GIS1	0	0	3	0	0	0	0	0	0	0	0	0	0	0	0	0	0	0	0	0	0
d1938	d1938.a1	d1938.a1.a1	Chassy_SC_2308;N1P9E4;P38805; Ribosome production factor 1 - RPF1	0	0	0	1	0	0	0	0	0	0	0	0	0	0	0	0	0	0	0	0	0
c194	c194.a1	c194.a1.a1	Chassy_SC_2301;N1NX04;P53598; Succinate--CoA ligase [ADP-forming] subunit alpha, mitochondrial - LSC1	15	17	19	17	23	13	11	21	17	19	23	15	10	13	20	20	22	10	20	10	9
d1850	d1850.a1	d1850.a1.a1	Chassy_SC_2300;N1P156;P38829; MIP18 family protein YHR122W - YHR122W	0	0	0	1	0	0	0	0	0	0	0	0	0	0	0	0	0	0	1	0	0
c503	c503.a1	c503.a1.a1	Chassy_SC_23;N1P5N0;Q12154; ATPase GET3 - GET3	4	6	7	5	7	4	3	7	10	6	10	4	5	3	8	10	11	3	9	4	5
c731	c731.a1	c731.a1.a1	Chassy_SC_2299;N1P6J7;Q07623; Nucleolar protein 6 - NOP6	0	5	5	2	6	2	0	6	3	2	5	4	0	0	5	5	6	2	6	0	0
d1042	d1042.a2	d1042.a2.a1	Chassy_SC_2298;N1P906;P06244; cAMP-dependent protein kinase type 1 - TPK1	0	1	3	0	1	0	0	0	2	1	1	0	0	0	1	1	0	0	0	0	0
d1959	d1959.a1	d1959.a1.a1	Chassy_SC_2296;N1NWC5;Q12160; Uncharacterized protein YPR063C - YPR063C	0	0	1	0	0	0	0	0	0	0	0	0	0	0	0	0	0	0	0	0	0
c131	c131.a1	c131.a1.a1	Chassy_SC_2293;N1NY39;P25294; Protein SIS1 - SIS1	15	25	26	27	27	17	11	25	26	27	24	26	10	9	25	24	24	20	29	10	10
c506	c506.a1	c506.a1.a1	Chassy_SC_2290;N1NYP8;(P0CX24-P0CX23);60S ribosomal protein L20- NA	3	6	10	10	9	4	4	7	7	7	8	6	4	5	7	7	7	4	6	5	4
c892	c892.a1	c892.a1.a1	Chassy_SC_229;N1P662;Q03640; Tricalbin-3 - TCB3	0	2	3	1	1	3	0	3	2	0	2	4	0	0	4	6	8	2	1	0	0
d1247	d1247.a1	d1247.a1.a1	Chassy_SC_2289;N1PAP8;P25348; 54S ribosomal protein L32, mitochondrial - MRPL32	0	1	1	1	1	1	0	1	1	1	1	1	0	0	1	1	1	1	1	0	0
c298	c298.a1	c298.a1.a1	Chassy_SC_2288;N1P789;P29509; Thioredoxin reductase 1 - TRR1	8	12	16	14	12	13	6	14	16	12	9	14	5	7	9	12	15	12	13	6	6
d1236	d1236.a1	d1236.a1.a1	Chassy_SC_2285;N1NY04;P41814; tRNA (adenine(58)-N(1))-methyltransferase non-catalytic subunit TRM6 - GCD10	0	1	1	1	1	1	0	1	2	1	1	1	0	0	1	1	2	0	1	0	0
c828	c828.a1	c828.a1.a1	Chassy_SC_228;N1P5Q9;P53044; Ubiquitin fusion degradation protein 1 - UFD1	0	4	3	4	8	2	0	2	3	4	3	3	0	0	2	5	2	1	4	0	0
c615	c615.a1	c615.a1.a1	Chassy_SC_2277;N1P0U8;P40363; S-formylglutathione hydrolase - YJL068C	0	6	10	6	8	1	0	6	8	7	6	4	0	0	6	7	9	0	7	0	0
c118	c118.a1	c118.a1.a1	Chassy_SC_2276;N1P6J1;P15992; Heat shock protein 26 - HSP26	14	32	35	19	40	8	18	38	30	18	44	6	12	11	25	36	40	9	21	14	12
c440	c440.a1	c440.a1.a1	Chassy_SC_2274;N1P0H6;Q04336; Uncharacterized protein YMR196W - YMR196W	4	16	17	4	7	3	1	8	14	4	16	6	1	1	17	17	15	1	2	1	1
c674	c674.a1	c674.a1.a1	Chassy_SC_2272;N1NZM5;P32895; Ribose-phosphate pyrophosphokinase 1 - PRS1	0	5	9	3	8	4	2	3	6	5	2	7	0	0	5	4	8	3	4	0	0
c132	c132.a1	c132.a1.a1	Chassy_SC_2270;N1P619;P16120; Threonine synthase - THR4	15	23	20	26	25	23	15	29	22	22	23	20	13	17	15	25	29	20	25	13	16
c266	c266.a1	c266.a1.a1	Chassy_SC_227;N1P357;P15625; Phenylalanine--tRNA ligase alpha subunit - FRS2	9	13	12	17	13	14	5	14	16	20	16	17	8	9	11	18	12	12	20	4	5
d1459	d1459.a1	d1459.a1.a1	Chassy_SC_2267;N1P768;P40090; MAU2 chromatid cohesion factor homolog - SCC4	0	0	0	1	1	0	0	0	1	1	1	0	0	0	1	0	1	0	1	0	0
c687	c687.a1	c687.a1.a1	Chassy_SC_2265;N1P6Z6;Q05515; Survival factor 1 - SVF1	1	4	3	4	4	5	2	5	5	4	4	4	1	2	3	3	6	5	6	3	1
d1650	d1650.a1	d1650.a1.a1	Chassy_SC_2260;N1P221;Q07897; Protein CMS1 - CMS1	0	0	1	0	1	0	0	0	0	0	0	0	0	0	1	1	0	0	0	0	0
d2082	d2082.a1	d2082.a1.a1	Chassy_SC_2259;N1P0T1;P40856; SIT4-associating protein SAP185 - SAP185	0	0	0	0	0	0	0	0	0	0	0	1	0	0	0	0	0	0	0	0	0
a2	a2.a2	a2.a2.a1	Chassy_SC_2256;N1P4W5;P40047; Aldehyde dehydrogenase 5, mitochondrial - ALD5	11	21	13	13	23	19	13	22	16	9	26	18	7	7	14	20	22	10	14	8	10
c925	c925.a1	c925.a1.a1	Chassy_SC_2254;N1P6M9;P36519; 54S ribosomal protein L7, mitochondrial - MRPL7	0	4	3	1	5	3	0	2	0	3	3	5	0	0	0	4	3	0	3	0	0
c598	c598.a1	c598.a1.a1	Chassy_SC_2253;N1P308;P32332; Mitochondrial oxaloacetate transport protein - OAC1	3	5	4	4	6	5	5	7	4	7	6	4	3	2	6	6	6	4	6	1	2
c226	c226.a1	c226.a1.a1	Chassy_SC_2240;N1P0W9;P32796; Carnitine O-acetyltransferase, mitochondrial - CAT2	11	19	20	16	16	7	14	18	22	15	21	5	8	10	24	22	22	3	24	10	9
d1882	d1882.a1	d1882.a1.a1	Chassy_SC_224;N1NWI2;Q06504; N-terminal acetyltransferase B complex catalytic subunit NAT3 - NAT3	0	0	0	0	0	0	0	0	0	0	0	1	0	0	0	0	0	0	1	0	0
d1543	d1543.a1	d1543.a1.a1	Chassy_SC_2235;N1P7L7;Q12082; Uncharacterized protein YDL157C, mitochondrial - YDL157C	0	0	2	1	0	1	0	0	1	0	0	1	0	0	0	0	1	0	0	0	0
d1359	d1359.a1	d1359.a1.a1	Chassy_SC_2234;N1NXY7;Q08962; 60S ribosome subunit biogenesis protein NIP7 - NIP7	0	1	0	2	1	1	0	0	0	1	0	1	0	0	1	1	0	0	2	0	0
c261	c261.a2	c261.a2.a1	Chassy_SC_2233;N1NZC7;P09734; Tubulin alpha-3 chain - TUB3	5	6	8	7	7	6	4	8	7	8	6	8	4	5	7	5	6	3	9	4	3
c210	c210.a2	c210.a2.a1	Chassy_SC_2232;N1PAI7;Q12458; Putative reductase 1 - YPR1	3	7	10	11	8	1	1	9	4	6	9	1	2	1	9	5	7	0	11	2	2
d1002	d1002.a1	d1002.a1.a1	Chassy_SC_2231;N1P5S6;P08456; CDP-diacylglycerol--serine O-phosphatidyltransferase - CHO1	1	1	3	3	1	2	1	2	1	2	0	2	1	2	2	1	2	1	1	1	1
d2079	d2079.a1	d2079.a1.a1	Chassy_SC_223;N1NW50;P37838; Nucleolar protein 4 - NOP4	0	0	0	0	1	0	0	0	0	0	0	0	0	0	0	0	0	0	0	0	0
d1567	d1567.a1	d1567.a1.a1	Chassy_SC_2228;N1P2C3;P32459; Ureidoglycolate lyase - DAL3	0	0	0	0	2	0	0	0	0	0	3	0	0	0	0	0	1	0	0	0	0
d1110	d1110.a2	d1110.a2.a1	Chassy_SC_2224;N1PAC4;P15732; Ubiquitin-conjugating enzyme E2-16 kDa - UBC5	1	0	1	0	1	0	1	1	2	1	1	0	0	0	1	2	2	0	0	1	0
c345	c345.a1	c345.a1.a1	Chassy_SC_2220;N1P9F0;CENPK specific;No description in SC288c, annotation and gene name in CENPK: Ribosomal protein L19 -CENPK1137D_4630	8	14	13	11	13	11	9	11	10	10	10	8	7	6	13	7	13	8	13	8	7
c706	c706.a2	c706.a2.a1	Chassy_SC_222;N1PA18;P56628; 60S ribosomal protein L22-B - RPL22B	0	0	0	2	3	0	0	1	0	1	0	0	0	0	1	2	1	0	0	0	0
c297	c297.a2	c297.a2.a1	Chassy_SC_2212;N1P0T6;P26784; 60S ribosomal protein L16-A - RPL16A	3	6	11	8	10	6	2	7	10	11	9	7	2	2	11	10	8	4	7	4	4
c684	c684.a2	c684.a2.a1	Chassy_SC_2209;N1P7P9;P22217; Thioredoxin-1 - TRX1	1	2	2	3	3	0	1	2	2	1	3	0	0	1	2	3	2	0	1	1	1
d1935	d1935.a1	d1935.a1.a1	Chassy_SC_2202;N1P1R6;Q03063; Down-regulator of invasive growth 1 - DIG1	0	0	1	0	0	0	0	0	0	0	0	0	0	0	0	0	0	0	0	0	0
c722	c722.a1	c722.a1.a1	Chassy_SC_2200;N1P4G2;P43621; Coatomer subunit delta - RET2	1	3	3	5	3	5	1	4	5	3	4	5	0	1	4	3	6	3	5	2	0
c938	c938.a1	c938.a1.a1	Chassy_SC_22;N1P150;P47119; Inosine triphosphate pyrophosphatase - HAM1	0	2	2	3	3	0	0	4	2	1	4	2	0	0	2	5	4	0	4	0	0
c705	c705.a1	c705.a1.a1	Chassy_SC_2199;N1NZT5;P32335; Protein MSS51, mitochondrial - MSS51	1	2	5	3	6	6	0	4	5	6	5	4	0	0	7	6	2	2	7	0	0
d1197	d1197.a1	d1197.a1.a1	Chassy_SC_2197;N1P9T4;P33307; Importin alpha re-exporter - CSE1	0	1	1	1	1	1	0	1	1	2	1	3	0	0	1	1	1	1	1	0	0
c547	c547.a2	c547.a2.a1	Chassy_SC_219;N1P0G3;P36018; GTP-binding protein YPT52 - YPT52	0	3	4	7	5	2	0	7	5	4	3	6	0	0	4	5	5	1	4	0	0
c701	c701.a1	c701.a1.a1	Chassy_SC_2185;N1P9K1;P38755; Oxysterol-binding protein homolog 7 - OSH7	2	2	5	7	6	3	2	5	3	7	4	3	1	0	3	3	2	2	5	1	1
c716	c716.a1	c716.a1.a1	Chassy_SC_2183;N1P104;P47085; MEMO1 family protein YJR008W - YJR008W	1	5	5	1	8	1	2	4	5	3	7	0	1	1	8	7	5	0	3	1	0
d1945	d1945.a1	d1945.a1.a1	Chassy_SC_2180;N1NXQ2;P32328; Serine/threonine-protein kinase DBF20 - DBF20	0	0	0	1	0	0	0	0	0	0	0	0	0	0	0	0	0	0	0	0	0
d1437	d1437.a1	d1437.a1.a1	Chassy_SC_218;N1P8R1;P34222; Peptidyl-tRNA hydrolase 2 - PTH2	0	1	1	1	0	0	0	0	0	0	0	3	0	0	1	0	1	0	1	0	0
c917	c917.a1	c917.a1.a1	Chassy_SC_2179;N1P775;P23595; Serine/threonine-protein phosphatase PP2A-2 catalytic subunit - PPH22	1	1	3	1	3	2	1	1	3	2	3	4	0	0	3	2	4	1	2	0	0
c461	c461.a2	c461.a2.a1	Chassy_SC_217;N1P4S8;P50278; 6-phosphogluconolactonase-like protein 1 - SOL1	1	3	3	6	5	2	2	3	5	9	4	2	3	1	4	3	5	0	9	3	2
d1193	d1193.a1	d1193.a1.a1	Chassy_SC_2166;N1P109;P46965; Signal peptidase complex subunit SPC1 - SPC1	0	2	2	1	1	1	0	1	1	1	0	2	0	0	2	1	2	0	1	0	0
c614	c614.a1	c614.a1.a1	Chassy_SC_2162;N1NWW4;P32563; V-type proton ATPase subunit a, vacuolar isoform - VPH1	0	3	8	5	5	8	1	5	6	5	3	9	0	0	6	8	8	6	4	1	0
c843	c843.a1	c843.a1.a1	Chassy_SC_216;N1P0W1;P40477; Nucleoporin NUP159 - NUP159	0	1	7	3	2	2	0	2	5	1	4	1	0	0	7	2	6	0	4	0	0
b28	b28.a1	b28.a1.a1	Chassy_SC_2159;N1NX50;P32589; Heat shock protein homolog SSE1 - SSE1	30	42	44	63	50	37	25	44	47	67	45	39	27	27	38	42	51	27	74	27	33
c990	c990.a1	c990.a1.a1	Chassy_SC_2158;N1P3M1;Q12024; Ribosome biogenesis protein YTM1 - YTM1	0	1	1	2	3	2	1	3	2	3	3	2	0	0	1	2	2	1	3	0	0
c158	c158.a1	c158.a1.a1	Chassy_SC_2157;N1P2S2;P38708; Putative proline--tRNA ligase YHR020W - YHR020W	14	25	25	18	18	15	12	21	19	21	23	23	13	12	19	24	24	19	22	10	12
b49	b49.a1	b49.a1.a1	Chassy_SC_2155;N1P1W8;P20967; 2-oxoglutarate dehydrogenase, mitochondrial - KGD1	31	39	53	59	49	32	23	43	53	52	47	42	22	19	42	47	50	27	58	20	21
c219	c219.a1	c219.a1.a1	Chassy_SC_2153;N1P2E4;P39935; Eukaryotic initiation factor 4F subunit p150 - TIF4631	8	11	17	21	15	18	10	12	12	17	14	25	7	7	18	15	19	13	18	5	6
c200	c200.a1	c200.a1.a1	Chassy_SC_2151;N1P6M4;P32599; Fimbrin - SAC6	10	20	21	17	22	14	13	15	21	20	18	19	11	12	15	22	21	10	17	9	9
c203	c203.a1	c203.a1.a1	Chassy_SC_2147;N1NWQ6;P33330; Phosphoserine aminotransferase - SER1	9	13	19	24	20	20	10	19	15	21	20	24	9	6	18	12	21	16	25	7	7
c600	c600.a1	c600.a1.a1	Chassy_SC_2145;N1NVK9;P30656; Proteasome subunit beta type-5 - PRE2	1	4	6	4	6	7	2	7	8	8	4	7	1	1	5	6	7	3	4	1	2
d1457	d1457.a1	d1457.a1.a1	Chassy_SC_2144;N1P4U8;Q03771; Assembly chaperone of RPL4 - ACL4	0	0	0	1	1	0	0	1	0	1	1	1	0	0	0	0	1	0	2	0	0
d1836	d1836.a1	d1836.a1.a1	Chassy_SC_2140;N1P635;Q04951; Probable family 17 glucosidase SCW10 - SCW10	0	0	0	0	1	0	0	0	0	0	0	0	0	0	0	1	0	0	0	0	0
c302	c302.a1	c302.a1.a1	Chassy_SC_214;N1NWL9;Q08972; [NU+] prion formation protein 1 - NEW1	6	13	21	15	17	10	5	11	15	14	12	13	1	5	18	14	17	7	17	4	6
d1615	d1615.a1	d1615.a1.a1	Chassy_SC_2139;N1P3G1;P40055; U3 small nucleolar RNA-associated protein 7 - UTP7	0	0	1	0	2	0	0	0	0	0	0	0	0	1	1	0	0	0	0	0	0
c327	c327.a1	c327.a1.a1	Chassy_SC_2138;N1NZ34;P46654; 40S ribosomal protein S0-B - RPS0B	8	11	13	11	14	11	8	13	11	11	11	10	8	7	10	16	11	11	14	9	7
d1123	d1123.a1	d1123.a1.a1	Chassy_SC_2136;N1P944;P40452; Cytochrome c oxidase assembly factor 1 - COA1	0	2	0	1	2	2	0	3	1	1	2	1	0	0	0	2	0	2	3	0	0
c789	c789.a1	c789.a1.a1	Chassy_SC_2135;N1P6S0;Q06287; Ribosomal RNA small subunit methyltransferase NEP1 - EMG1	0	4	4	5	5	2	0	4	5	4	4	1	0	0	3	4	5	0	4	0	0
c576	c576.a1	c576.a1.a1	Chassy_SC_2134;N1P618;P41058; 40S ribosomal protein S29-B - RPS29B	2	5	5	4	6	5	3	5	3	5	7	5	4	3	5	5	5	4	6	3	4
d1878	d1878.a1	d1878.a1.a1	Chassy_SC_2133;N1P3F3;P47112; Cell division cycle protein CDT1 - TAH11	0	0	0	0	0	0	0	0	0	1	0	0	0	0	0	0	1	0	0	0	0
d1307	d1307.a1	d1307.a1.a1	Chassy_SC_213;N1P7G5;P36517; 54S ribosomal protein L4, mitochondrial - MRPL4	0	1	0	0	1	1	0	1	1	0	2	0	0	0	0	1	2	0	3	0	0
c313	c313.a1	c313.a1.a1	Chassy_SC_2128;N1P371;P07560; Ras-related protein SEC4 - SEC4	8	9	8	7	8	7	9	9	9	7	7	7	4	6	8	7	9	7	9	6	7
c686	c686.a1	c686.a1.a1	Chassy_SC_2125;N1NVX9;P12962; Cap-associated protein CAF20 - CAF20	3	4	4	4	4	4	2	4	4	4	3	5	2	2	4	4	5	4	5	2	2
d2015	d2015.a1	d2015.a1.a1	Chassy_SC_2124;N1P7Q4;Q01802; Aspartate aminotransferase, mitochondrial - AAT1	0	0	0	0	0	0	0	0	0	0	0	0	0	0	0	0	1	0	0	0	0
c795	c795.a1	c795.a1.a1	Chassy_SC_2123;N1P720;P38628; Phosphoacetylglucosamine mutase - PCM1	1	4	4	4	3	3	0	3	3	4	2	3	0	0	4	4	7	0	4	0	0
d1209	d1209.a1	d1209.a1.a1	Chassy_SC_2117;N1P6H7;P32451; Biotin synthase, mitochondrial - BIO2	0	0	0	0	0	5	0	0	0	1	1	5	0	0	0	0	0	1	4	0	0
c787	c787.a1	c787.a1.a1	Chassy_SC_2115;N1PAE8;Q03973; High mobility group protein 1 - HMO1	1	3	4	4	2	3	1	3	4	2	4	3	1	1	5	5	3	3	3	0	0
d1133	d1133.a1	d1133.a1.a1	Chassy_SC_2106;N1NVM9;O13297; mRNA-capping enzyme subunit beta - CET1	0	2	1	3	1	1	0	1	1	1	2	1	0	0	0	2	3	0	3	0	0
c342	c342.a1	c342.a1.a1	Chassy_SC_2104;N1P9N7;P37302; Aminopeptidase Y - APE3	11	9	8	10	11	11	6	13	7	13	14	12	7	4	10	13	15	12	12	6	7
d1523	d1523.a1	d1523.a1.a1	Chassy_SC_2103;N1P8V1;P39727; ER-derived vesicles protein ERV46 - ERV46	0	1	0	0	1	0	0	0	0	1	0	0	0	0	0	1	3	0	0	0	0
c775	c775.a1	c775.a1.a1	Chassy_SC_2100;N1P2G6;P40483; Putative zinc metalloproteinase YIL108W - YIL108W	1	1	2	9	1	5	0	1	5	11	1	3	0	0	4	1	3	0	9	0	0
c413	c413.a2	c413.a2.a1	Chassy_SC_21;N1P0Q1;P15700; Uridylate kinase - URA6	0	3	4	1	1	0	0	1	2	2	2	0	0	0	2	3	1	0	0	0	0
d1044	d1044.a1	d1044.a1.a1	Chassy_SC_2098;N1NZB9;P33204; Actin-related protein 2/3 complex subunit 4 - ARC19	0	0	1	2	3	1	0	3	3	2	2	3	0	0	3	3	1	0	0	0	0
d1910	d1910.a1	d1910.a1.a1	Chassy_SC_2097;N1NYR8;P28239; Inorganic pyrophosphatase, mitochondrial - PPA2	0	0	0	0	0	0	0	0	0	0	0	0	0	0	0	0	1	0	0	0	0
d1484	d1484.a1	d1484.a1.a1	Chassy_SC_2096;N1NXB1;P53877; Pre-rRNA-processing protein IPI3 - IPI3	0	1	0	0	0	0	0	2	0	0	0	0	0	0	0	0	4	0	1	0	0
d1421	d1421.a1	d1421.a1.a1	Chassy_SC_2092;N1P091;Q02486; ARS-binding factor 2, mitochondrial - ABF2	0	3	2	0	0	0	0	0	1	0	3	0	0	0	0	0	0	0	0	0	0
c133	c133.a1	c133.a1.a1	Chassy_SC_2090;N1PAX0;P38158; Alpha-glucosidase MAL32 - MAL32	16	7	8	14	12	60	14	10	6	20	9	66	11	14	8	12	7	33	20	12	12
c949	c949.a1	c949.a1.a1	Chassy_SC_2089;N1P6T0;P22213; Protein SLY1 - SLY1	0	2	2	4	2	1	0	5	2	3	3	1	0	0	3	2	2	1	4	0	0
d1775	d1775.a1	d1775.a1.a1	Chassy_SC_2085;N1P7A6;Q06389; Calcium-binding protein NCS-1 - FRQ1	0	0	0	0	0	0	0	0	0	1	0	1	0	0	0	0	0	0	1	0	0
d1143	d1143.a1	d1143.a1.a1	Chassy_SC_2084;N1P1B5;P38875; GPI transamidase component GPI16 - GPI16	1	2	2	1	1	1	0	0	1	1	2	1	0	0	2	1	2	2	1	0	0
c134	c134.a1	c134.a1.a1	Chassy_SC_2083;N1P4J3;P13711; Acyl-coenzyme A oxidase - POX1	18	25	26	26	26	9	14	25	24	32	24	13	14	17	22	30	32	6	30	8	13
c175	c175.a1	c175.a1.a1	Chassy_SC_2080;N1P669;P53312; Succinate--CoA ligase [ADP-forming] subunit beta, mitochondrial - LSC2	8	17	20	24	28	15	10	22	21	23	24	13	12	10	19	23	28	11	24	9	7
c146	c146.a1	c146.a1.a1	Chassy_SC_208;N1P050;P14742; Glutamine--fructose-6-phosphate aminotransferase [isomerizing] - GFA1	13	26	27	22	25	22	10	25	29	22	23	25	9	8	23	23	29	16	19	9	6
d1266	d1266.a1	d1266.a1.a1	Chassy_SC_2079;N1P713;P29029; Endochitinase - CTS1	0	2	2	0	1	1	0	1	1	0	1	0	0	1	1	1	1	1	0	0	0
c225	c225.a1	c225.a1.a1	Chassy_SC_2078;N1PAP6;P25605; Acetolactate synthase small subunit, mitochondrial - ILV6	10	22	12	15	24	14	6	24	16	20	20	13	9	9	12	22	30	11	15	7	6
c376	c376.a1	c376.a1.a1	Chassy_SC_2076;N1P7M3;P27616; Phosphoribosylaminoimidazole-succinocarboxamide synthase - ADE1	5	11	10	17	16	4	4	12	8	10	11	9	5	3	10	12	14	6	12	6	4
d1599	d1599.a1	d1599.a1.a1	Chassy_SC_2074;N1P360;P53154; Glycerol uptake protein 1 - GUP1	0	0	1	0	0	1	0	0	0	2	0	1	0	0	0	0	0	1	0	0	0
c819	c819.a1	c819.a1.a1	Chassy_SC_2073;N1P299;P38828; Protein LSM12 - LSM12	0	3	4	3	4	3	0	4	5	3	5	4	0	0	2	4	3	1	3	0	0
c517	c517.a1	c517.a1.a1	Chassy_SC_2072;N1P0L2;Q04013; Citrate/oxoglutarate carrier protein - YHM2	4	5	8	5	6	7	4	8	5	7	7	8	4	6	6	5	10	5	7	4	4
d1718	d1718.a1	d1718.a1.a1	Chassy_SC_2071;N1NVX4;CENPK specific;No description in SC288c, annotation and gene name in CENPK: Sec16p -CENPK1137D_1615	0	0	1	0	0	1	0	0	0	0	0	0	0	0	0	0	1	0	0	0	0
c296	c296.a2	c296.a2.a1	Chassy_SC_207;N1P1I2;P32793; Protein YSC84 - YSC84	2	6	7	5	8	6	3	6	6	7	8	4	2	3	7	6	10	5	6	1	1
d1900	d1900.a1	d1900.a1.a1	Chassy_SC_2069;N1P6G1;Q12427; Protein STB3 - STB3	0	0	1	0	0	0	0	0	0	0	0	0	0	0	0	0	0	0	0	0	0
d1113	d1113.a1	d1113.a1.a1	Chassy_SC_2068;N1P3G6;P47116; Serine/threonine-protein kinase PTK2/STK2 - PTK2	0	1	3	4	2	0	0	1	2	3	1	0	0	0	1	1	1	0	2	0	0
c782	c782.a1	c782.a1.a1	Chassy_SC_2065;N1PAZ0;P31382; Dolichyl-phosphate-mannose--protein mannosyltransferase 2 - PMT2	2	2	4	1	2	5	2	2	3	2	2	5	2	2	2	3	3	5	3	2	2
c547	c547.a1	c547.a1.a1	Chassy_SC_2064;N1P326;P36017; Vacuolar protein sorting-associated protein 21 - VPS21	0	4	4	4	6	4	0	7	5	1	3	3	0	0	5	7	5	2	6	0	0
c463	c463.a1	c463.a1.a1	Chassy_SC_2060;N1NVR3;P20449; ATP-dependent RNA helicase DBP5 - DBP5	4	9	9	10	8	11	2	8	9	10	9	10	1	1	7	8	9	8	12	0	1
c184	c184.a1	c184.a1.a1	Chassy_SC_206;N1P152;P33299; 26S proteasome regulatory subunit 7 homolog - RPT1	11	16	17	15	19	10	9	17	13	15	18	15	8	10	12	16	16	12	18	7	7
d1155	d1155.a1	d1155.a1.a1	Chassy_SC_2054;N1P4H9;P40515; Mitochondrial fission 1 protein - FIS1	0	1	2	1	3	0	0	1	1	2	1	0	0	0	2	2	2	0	2	0	0
d1183	d1183.a1	d1183.a1.a1	Chassy_SC_2051;N1NZ94;P53881; 54S ribosomal protein L22, mitochondrial - MRPL22	0	1	1	1	0	1	1	1	1	0	1	1	0	0	2	2	2	1	2	0	0
d1853	d1853.a1	d1853.a1.a1	Chassy_SC_205;N1NZL4;P25296; Calcineurin subunit B - CNB1	0	0	0	0	0	0	0	0	0	1	0	0	0	0	0	0	0	0	1	0	0
c693	c693.a1	c693.a1.a1	Chassy_SC_2045;N1P5A9;P50107; Lactoylglutathione lyase - GLO1	1	5	1	8	6	3	2	5	2	7	7	2	2	1	2	6	7	1	6	0	0
c581	c581.a1	c581.a1.a1	Chassy_SC_2044;N1P2M4;P38791; Deoxyhypusine synthase - DYS1	1	8	6	7	6	10	1	5	5	6	5	10	1	1	4	5	6	6	8	1	1
c420	c420.a1	c420.a1.a1	Chassy_SC_2043;N1P256;P41277; Glycerol-1-phosphate phosphohydrolase 1 - GPP1	3	8	7	18	10	3	4	8	7	17	8	3	4	4	7	8	8	3	16	4	4
c262	c262.a1	c262.a1.a1	Chassy_SC_2040;N1P1X6;P08524; Farnesyl pyrophosphate synthase - ERG20	6	13	16	14	17	17	10	11	15	15	13	18	12	10	13	16	17	9	12	8	7
d1970	d1970.a1	d1970.a1.a1	Chassy_SC_204;N1NZJ0;Q12396;|reversed Protein EMP46 - EMP46	0	0	0	0	0	0	0	0	0	0	0	0	0	0	1	0	0	0	0	0	0
c704	c704.a1	c704.a1.a1	Chassy_SC_2036;N1P9G5;P14922; General transcriptional corepressor CYC8 - CYC8	1	6	8	3	5	1	3	4	7	1	6	3	0	1	7	4	7	0	3	0	1
c900	c900.a1	c900.a1.a1	Chassy_SC_2033;N1NXH2;P19524; Myosin-2 - MYO2	0	2	4	4	2	5	1	0	2	2	0	6	0	0	4	4	2	1	2	0	0
d1400	d1400.a1	d1400.a1.a1	Chassy_SC_2032;N1NXD6;Q12404; Protein disulfide-isomerase MPD1 - MPD1	0	0	2	0	2	0	0	0	2	0	1	1	0	0	0	0	0	0	2	0	0
d1144	d1144.a1	d1144.a1.a1	Chassy_SC_203;N1NWY7;P07258; Carbamoyl-phosphate synthase arginine-specific small chain - CPA1	0	1	0	2	1	1	0	2	1	4	0	1	0	0	0	0	2	1	5	0	0
d1997	d1997.a1	d1997.a1.a1	Chassy_SC_2029;N1P6H4;Q12255; Vacuolar v-SNARE NYV1 - NYV1	0	0	1	0	0	0	0	0	0	0	0	0	0	0	0	0	0	0	0	0	0
c311	c311.a1	c311.a1.a1	Chassy_SC_2027;N1P083;P47143; Adenosine kinase - ADO1	5	17	15	15	16	3	6	18	16	14	15	5	5	5	11	16	22	3	14	5	5
d1611	d1611.a1	d1611.a1.a1	Chassy_SC_2026;N1P0Q9;P35999; Mitochondrial intermediate peptidase - OCT1	0	0	0	2	0	0	0	0	0	1	0	0	0	0	0	0	0	0	2	0	0
d1663	d1663.a1	d1663.a1.a1	Chassy_SC_2025;N1NY63;Q12019; Midasin - MDN1	0	0	0	1	0	0	0	0	0	1	0	2	0	0	0	0	0	0	0	0	0
d1942	d1942.a1	d1942.a1.a1	Chassy_SC_2024;N1NW85;P33311; ATP-dependent permease MDL2, mitochondrial - MDL2	0	0	0	0	0	0	0	0	0	0	0	0	0	0	0	0	0	0	1	0	0
d2033	d2033.a1	d2033.a1.a1	Chassy_SC_2023;N1P341;P40362; U3 small nucleolar RNA-associated protein 18 - UTP18	0	0	1	0	0	0	0	0	0	0	0	0	0	0	0	0	0	0	0	0	0
d1177	d1177.a1	d1177.a1.a1	Chassy_SC_2022;N1P149;P36059; ATP-dependent (S)-NAD(P)H-hydrate dehydratase - YKL151C	0	1	1	1	2	0	0	1	1	1	1	1	0	0	2	3	1	1	2	0	0
c371	c371.a1	c371.a1.a1	Chassy_SC_2021;N1NZK1;P52893; Probable alanine aminotransferase, mitochondrial - ALT1	4	11	6	13	15	9	5	12	7	11	15	16	4	5	3	13	16	8	13	4	1
c287	c287.a1	c287.a1.a1	Chassy_SC_202;N1P645;P40302; Proteasome subunit alpha type-6 - PRE5	8	13	13	15	17	13	8	16	14	15	13	12	4	8	11	13	13	14	14	9	7
d1933	d1933.a1	d1933.a1.a1	Chassy_SC_2018;N1P106;P23285; Peptidyl-prolyl cis-trans isomerase B - CPR2	0	0	0	0	0	0	0	0	0	0	1	0	0	0	0	0	0	0	0	0	0
c375	c375.a1	c375.a1.a1	Chassy_SC_2017;N1P018;P38631; 1,3-beta-glucan synthase component FKS1 - FKS1	3	8	13	8	7	14	4	5	15	7	6	12	3	4	13	14	15	7	8	2	4
d2037	d2037.a1	d2037.a1.a1	Chassy_SC_2015;N1NY77;Q02805; Protein ROD1 - ROD1	0	0	1	0	0	0	0	0	0	0	0	0	0	0	0	0	0	0	0	0	0
c729	c729.a1	c729.a1.a1	Chassy_SC_2013;N1P6A9;Q03835; Monothiol glutaredoxin-3 - GRX3	1	2	2	3	2	2	0	4	3	4	3	3	1	1	3	3	4	2	3	0	1
c781	c781.a1	c781.a1.a1	Chassy_SC_2011;N1PA79;P33767; Dolichyl-diphosphooligosaccharide--protein glycosyltransferase subunit WBP1 - WBP1	1	4	5	4	3	4	1	5	3	3	5	2	1	1	2	4	5	1	2	1	0
c148	c148.a2	c148.a2.a1	Chassy_SC_201;N1P9E5;P38695; Probable glucose transporter HXT5 - HXT5	6	4	15	7	5	6	3	5	10	6	4	5	4	3	12	7	9	3	3	3	4
d1366	d1366.a1	d1366.a1.a1	Chassy_SC_2008;N1P475;P53883; Nucleolar protein 13 - NOP13	0	0	1	0	1	1	0	1	1	0	1	1	0	0	1	0	2	0	1	0	0
c531	c531.a1	c531.a1.a1	Chassy_SC_2005;N1P0N9;P23639; Proteasome subunit alpha type-2 - PRE8	3	8	7	5	6	6	2	7	7	10	9	7	3	1	6	7	8	5	9	1	2
c626	c626.a1	c626.a1.a1	Chassy_SC_2003;N1P219;P40513; Mitochondrial acidic protein MAM33 - MAM33	0	4	6	8	8	6	0	10	4	5	6	7	0	0	5	4	6	4	6	0	0
d1141	d1141.a1	d1141.a1.a1	Chassy_SC_2001;N1P5J2;P32621; Guanosine-diphosphatase - GDA1	1	1	1	1	1	1	0	1	1	2	1	2	0	0	1	2	3	1	1	0	0
b17	b17.a1	b17.a1.a1	Chassy_SC_20;N1P2M1;P16861; ATP-dependent 6-phosphofructokinase subunit alpha - PFK1	29	40	45	59	40	55	27	43	53	64	38	63	29	22	43	54	50	45	61	19	20
c634	c634.a1	c634.a1.a1	Chassy_SC_1998;N1P857;P38264; SRP-independent targeting protein 3 - PHO88	4	5	4	5	5	7	2	3	3	5	5	6	2	2	5	6	3	7	4	2	1
c851	c851.a1	c851.a1.a1	Chassy_SC_1996;N1P3A3;CENPK specific;No description in SC288c, annotation and gene name in CENPK: Rpl30p -CENPK1137D_2941	3	2	2	2	3	2	3	2	2	2	2	2	3	1	2	3	2	2	2	3	2
d1782	d1782.a1	d1782.a1.a1	Chassy_SC_1995;N1P1Y8;P27705; Regulatory protein MIG1 - MIG1	0	0	1	0	1	0	0	0	0	0	0	0	0	0	0	0	0	0	0	0	0
d1311	d1311.a1	d1311.a1.a1	Chassy_SC_1993;N1P5C7;P39994; Putative 2-hydroxyacyl-CoA lyase - YEL020C	0	0	0	2	0	0	0	0	1	5	0	0	0	1	0	1	0	0	3	0	0
d1858	d1858.a1	d1858.a1.a1	Chassy_SC_1991;N1NWL2;P32349; DNA-directed RNA polymerase III subunit RPC3 - RPC82	0	0	0	0	0	1	0	0	0	0	0	1	0	0	0	0	0	0	0	0	0
c511	c511.a1	c511.a1.a1	Chassy_SC_1987;N1P247;P38795; Glutamine-dependent NAD(+) synthetase - QNS1	2	10	11	8	5	7	3	8	9	7	3	10	2	1	9	9	9	5	8	2	1
c348	c348.a1	c348.a1.a1	Chassy_SC_1983;N1P2Z3;Q08412; Ubiquitin-binding protein CUE5 - CUE5	2	9	17	13	9	11	1	9	15	10	18	17	2	1	15	15	17	6	19	0	1
d1150	d1150.a1	d1150.a1.a1	Chassy_SC_1982;N1NWX3;P48439; Dolichyl-diphosphooligosaccharide--protein glycosyltransferase subunit 3 - OST3	0	1	2	1	1	1	0	1	2	1	0	3	0	0	1	2	2	1	2	0	0
d1218	d1218.a1	d1218.a1.a1	Chassy_SC_1979;N1NYW8;CENPK specific;No description in SC288c, annotation and gene name in CENPK: Ddr48p -CENPK1137D_206	0	0	1	2	3	1	1	0	0	1	3	0	0	0	1	1	0	0	2	0	0
c525	c525.a1	c525.a1.a1	Chassy_SC_1976;N1P8D4;P38250; Increased sodium tolerance protein 2 - IST2	3	5	10	4	6	5	4	5	12	6	5	3	3	3	10	8	12	4	8	3	2
d1378	d1378.a1	d1378.a1.a1	Chassy_SC_1974;N1P1V0;P53152; Ubiquitin-conjugating enzyme variant MMS2 - MMS2	0	1	1	1	2	0	0	1	0	0	2	0	0	0	0	0	2	0	1	0	0
c810	c810.a1	c810.a1.a1	Chassy_SC_1971;N1P9R8;P32790; Actin cytoskeleton-regulatory complex protein SLA1 - SLA1	0	2	6	1	5	3	0	4	6	0	5	4	1	0	6	2	5	0	0	1	1
c268	c268.a1	c268.a1.a1	Chassy_SC_197;N1P8H2;P32473; Pyruvate dehydrogenase E1 component subunit beta, mitochondrial - PDB1	10	12	12	15	14	14	9	16	13	14	19	12	7	6	13	16	16	16	14	10	7
b52	b52.a1	b52.a1.a1	Chassy_SC_1969;N1PAX7;P18239; ADP,ATP carrier protein 2 - PET9	29	41	40	49	41	27	25	36	43	53	39	32	31	29	40	40	54	26	47	26	29
d1354	d1354.a1	d1354.a1.a1	Chassy_SC_1966;N1P0G9;Q03246; 37S ribosomal protein S17, mitochondrial - MRPS17	0	0	0	1	3	2	0	0	0	1	1	0	0	0	0	1	1	0	1	0	0
d2076	d2076.a1	d2076.a1.a1	Chassy_SC_1964;N1P6V4;P53378; Tubulin gamma chain - TUB4	0	0	0	0	0	0	0	0	1	0	0	0	0	0	0	0	0	0	0	0	0
c393	c393.a1	c393.a1.a1	Chassy_SC_1962;N1PAW7;P34227; Peroxiredoxin PRX1, mitochondrial - PRX1	2	10	13	14	13	5	4	11	10	14	10	8	5	4	8	12	9	2	15	5	4
d1376	d1376.a1	d1376.a1.a1	Chassy_SC_196;N1P119;P38737; Proteasome component ECM29 - ECM29	0	0	1	5	1	0	0	0	0	1	1	0	0	0	0	0	2	0	0	0	0
d1230	d1230.a2	d1230.a2.a1	Chassy_SC_1959;N1NY54;Q12692; Histone H2A.Z - HTZ1	0	0	1	0	1	0	0	0	0	0	1	0	0	0	0	0	0	0	0	0	1
d1391	d1391.a1	d1391.a1.a1	Chassy_SC_1957;N1PAR0;P38068; Monothiol glutaredoxin-7 - GRX7	0	1	1	1	1	0	0	0	0	1	1	0	0	0	1	1	1	0	1	0	0
c846	c846.a1	c846.a1.a1	Chassy_SC_1956;N1P593;P49435; Adenine phosphoribosyltransferase 1 - APT1	1	3	4	3	5	0	0	5	2	2	4	1	0	0	2	5	6	0	4	0	0
c587	c587.a1	c587.a1.a1	Chassy_SC_1954;N1P3R3;O14467; Multiprotein-bridging factor 1 - MBF1	2	8	8	5	6	5	2	5	6	7	8	6	1	0	6	4	5	3	9	2	1
d1628	d1628.a1	d1628.a1.a1	Chassy_SC_1953;N1NXQ7;Q03529; Ceramide very long chain fatty acid hydroxylase SCS7 - SCS7	0	0	0	0	0	2	0	0	0	0	0	2	0	0	0	0	0	1	0	0	0
c509	c509.a1	c509.a1.a1	Chassy_SC_1951;N1P3H3;P40413; T-complex protein 1 subunit epsilon - CCT5	0	10	10	9	9	6	3	6	10	9	7	8	1	2	8	6	12	3	11	0	0
c245	c245.a1	c245.a1.a1	Chassy_SC_195;N1P3J9;P39940; E3 ubiquitin-protein ligase RSP5 - RSP5	10	15	19	16	15	20	8	16	18	14	16	20	5	4	19	16	20	12	19	2	5
c258	c258.a1	c258.a1.a1	Chassy_SC_1949;N1P9N3;P41811; Coatomer subunit beta' - SEC27	5	18	17	18	14	20	5	12	20	19	16	16	4	3	15	16	19	12	18	4	3
d1577	d1577.a1	d1577.a1.a1	Chassy_SC_1948;N1P1E2;P46992; Cell wall protein YJL171C - YJL171C	0	0	0	0	1	2	0	0	0	0	1	0	0	0	0	2	0	0	0	0	0
d1491	d1491.a1	d1491.a1.a1	Chassy_SC_1946;N1PA42;P39525; 3-oxoacyl-[acyl-carrier-protein] synthase homolog - CEM1	0	0	1	0	0	2	0	0	1	0	0	1	0	0	3	0	0	0	0	0	0
c235	c235.a1	c235.a1.a1	Chassy_SC_1944;N1P959;P39078; T-complex protein 1 subunit delta - CCT4	10	19	17	21	19	11	9	19	18	17	18	15	8	5	17	15	23	9	19	5	8
d1861	d1861.a1	d1861.a1.a1	Chassy_SC_1939;N1NYG4;Q12375; Mitochondrial ornithine transporter 1 - ORT1	0	1	0	0	0	0	0	0	0	0	0	0	0	0	0	0	1	0	0	0	0
d1189	d1189.a1	d1189.a1.a1	Chassy_SC_1935;N1P6A4;P52490; Ubiquitin-conjugating enzyme E2 13 - UBC13	0	1	2	2	1	0	0	1	1	1	1	2	0	0	1	1	2	0	2	0	0
d1801	d1801.a1	d1801.a1.a1	Chassy_SC_1930;N1P5K2;Q04471; Putative peptidase YMR114C - YMR114C	0	0	0	0	0	0	0	0	1	0	0	0	0	0	1	0	0	0	0	0	0
c210	c210.a1	c210.a1.a1	Chassy_SC_1927;N1NYF5;P14065; Glycerol 2-dehydrogenase (NADP(+)) - GCY1	7	17	14	17	22	1	8	19	16	17	21	1	5	5	15	17	19	1	19	6	7
b76	b76.a4	b76.a4.a1	Chassy_SC_1926;N1P4D0;CENPK specific;No description in SC288c, annotation and gene name in CENPK: Dbp2p -CENPK1137D_2567	1	5	2	2	9	3	1	4	2	4	9	3	1	1	2	6	7	2	8	1	1
d1749	d1749.a1	d1749.a1.a1	Chassy_SC_1925;N1P7F1;P28263; Ubiquitin-conjugating enzyme E2-24 kDa - UBC8	0	0	2	0	0	0	0	0	0	1	0	0	0	0	0	0	0	0	0	0	0
c354	c354.a1	c354.a1.a1	Chassy_SC_1924;N1P333;P38701; 40S ribosomal protein S20 - RPS20	5	11	12	10	17	10	5	10	9	11	14	12	4	5	9	10	15	9	15	4	6
d1322	d1322.a1	d1322.a1.a1	Chassy_SC_1923;N1P1F9;P32604; Fructose-2,6-bisphosphatase - FBP26	0	0	5	0	0	0	0	0	1	0	0	0	0	0	3	2	1	0	0	0	0
c387	c387.a1	c387.a1.a1	Chassy_SC_1919;N1P6Q9;Q12329; Heat shock protein 42 - HSP42	3	8	14	11	17	3	3	11	14	10	15	3	2	3	12	14	16	2	11	5	4
c664	c664.a1	c664.a1.a1	Chassy_SC_1918;N1P3P6;P48837; Nucleoporin NUP57 - NUP57	3	4	5	5	5	3	1	5	5	5	6	5	0	1	5	5	6	4	6	0	1
c450	c450.a2	c450.a2.a1	Chassy_SC_1914;N1P3T4;P46990; 60S ribosomal protein L17-B - RPL17B	4	9	11	5	9	4	3	4	8	5	12	4	2	3	7	5	8	4	7	3	3
c460	c460.a1	c460.a1.a1	Chassy_SC_1911;N1P551;P00498; ATP phosphoribosyltransferase - HIS1	2	9	8	8	10	8	6	8	7	9	10	10	3	3	7	10	13	6	8	1	2
c219	c219.a2	c219.a2.a1	Chassy_SC_1910;N1P1X7;P39936; Eukaryotic initiation factor 4F subunit p130 - TIF4632	2	3	4	5	4	6	0	2	2	3	3	4	0	0	4	4	8	1	3	0	0
d1641	d1641.a1	d1641.a1.a1	Chassy_SC_1905;N1NW14;Q12080; Ribosome biogenesis protein NOP53 - NOP53	0	1	1	0	1	0	0	0	0	0	0	0	0	0	0	0	1	0	0	0	0
d1343	d1343.a1	d1343.a1.a1	Chassy_SC_1904;N1P1P9;P40548; HSP70 co-chaperone SNL1 - SNL1	0	1	1	1	1	1	0	1	0	1	1	1	0	0	0	1	1	0	1	0	0
c193	c193.a1	c193.a1.a1	Chassy_SC_1903;N1NVS9;P21264; Phosphoribosylaminoimidazole carboxylase - ADE2	12	17	18	23	18	20	12	19	14	24	19	18	9	12	13	20	17	15	30	8	8
d1290	d1290.a1	d1290.a1.a1	Chassy_SC_1902;N1PA04;P53100; Putative 2-hydroxyacid dehydrogenase YGL185C - YGL185C	0	1	1	1	1	1	0	1	1	1	1	0	0	0	1	1	1	0	1	0	0
d1464	d1464.a1	d1464.a1.a1	Chassy_SC_190;N1NWJ8;P32561; Histone deacetylase RPD3 - RPD3	0	0	1	0	1	0	0	0	1	1	1	0	0	0	0	1	0	0	2	0	0
d1981	d1981.a1	d1981.a1.a1	Chassy_SC_1898;N1P340;Q12271; Polyphosphatidylinositol phosphatase INP53 - INP53	0	0	0	0	0	0	0	0	0	0	0	1	0	0	0	0	0	0	0	0	0
d2039	d2039.a1	d2039.a1.a1	Chassy_SC_1892;N1P2Z2;P34163; Sterol esterase TGL1 - TGL1	0	0	0	0	0	0	0	0	1	0	0	0	0	0	0	0	0	0	0	0	0
d1532	d1532.a1	d1532.a1.a1	Chassy_SC_1887;N1NWU5;CENPK specific;No description in SC288c, annotation and gene name in CENPK: Abp140p -CENPK1137D_2255	0	0	2	0	0	0	0	0	1	0	0	0	0	0	2	0	2	0	0	0	0
c867	c867.a1	c867.a1.a1	Chassy_SC_1886;N1P9P0;P32505; Nuclear polyadenylated RNA-binding protein NAB2 - NAB2	1	3	5	1	4	2	2	2	4	1	1	2	0	0	6	2	3	2	3	0	0
d1426	d1426.a1	d1426.a1.a1	Chassy_SC_1884;N1P5N4;Q03790; Nucleoporin NUP53 - NUP53	0	1	2	0	0	1	0	0	0	1	0	0	0	0	0	0	3	0	1	0	0
d1581	d1581.a1	d1581.a1.a1	Chassy_SC_1882;N1PAI1;P52918; Protein MSN5 - MSN5	0	0	2	0	0	0	0	0	1	0	0	0	0	0	1	1	0	0	1	0	0
c519	c519.a1	c519.a1.a1	Chassy_SC_1881;N1P657;P14843; Phospho-2-dehydro-3-deoxyheptonate aldolase, phenylalanine-inhibited - ARO3	7	8	7	5	10	7	4	10	7	4	8	4	2	4	4	7	10	5	4	4	3
d1669	d1669.a1	d1669.a1.a1	Chassy_SC_1880;N1P2F9;P53296; Alcohol O-acetyltransferase 2 - ATF2	0	0	0	0	0	2	0	0	0	0	0	2	0	0	0	0	0	0	0	0	0
d1372	d1372.a1	d1372.a1.a1	Chassy_SC_1878;N1P610;P48445; Biotin--protein ligase - BPL1	0	1	1	1	1	0	0	1	0	0	0	3	0	0	1	0	0	0	2	0	0
c497	c497.a1	c497.a1.a1	Chassy_SC_1877;N1P5I0;P32263; Pyrroline-5-carboxylate reductase - PRO3	6	8	9	5	6	7	2	10	11	6	9	5	5	4	5	6	7	7	6	5	4
d1429	d1429.a1	d1429.a1.a1	Chassy_SC_1876;N1P2T6;P53091; DNA replication licensing factor MCM6 - MCM6	0	0	1	1	0	0	0	0	0	0	1	2	0	0	0	1	2	0	1	0	0
d1510	d1510.a1	d1510.a1.a1	Chassy_SC_1875;N1NY62;Q03677; 1,2-dihydroxy-3-keto-5-methylthiopentene dioxygenase - ADI1	0	1	0	0	4	0	0	0	0	0	0	0	0	0	0	1	1	0	0	0	0
d1225	d1225.a1	d1225.a1.a1	Chassy_SC_1873;N1P982;P25573; Mitochondrial inner membrane i-AAA protease supercomplex subunit MGR1 - MGR1	0	1	4	1	0	0	0	0	2	1	1	1	0	0	2	1	1	0	1	0	0
c113	c113.a1	c113.a1.a1	Chassy_SC_1869;N1P4X8;(P0CX35-P0CX36);40S ribosomal protein S4- NA	12	28	23	23	38	20	17	29	29	22	32	26	16	14	21	25	31	17	32	16	17
d1145	d1145.a1	d1145.a1.a1	Chassy_SC_1866;N1P0K2;P36160; Ribosome biogenesis protein RPF2 - RPF2	0	1	1	1	1	1	1	1	1	2	1	1	0	2	1	1	2	1	1	0	1
d1576	d1576.a1	d1576.a1.a1	Chassy_SC_1863;N1P500;P39104; Phosphatidylinositol 4-kinase PIK1 - PIK1	0	0	3	1	0	0	0	0	0	0	0	0	0	0	1	1	0	0	0	0	0
c533	c533.a1	c533.a1.a1	Chassy_SC_1862;N1P2J7;P53303; Zinc finger protein ZPR1 - ZPR1	1	8	9	9	8	6	2	7	9	7	9	7	1	1	9	7	7	4	5	1	1
c179	c179.a1	c179.a1.a1	Chassy_SC_1858;N1P598;(P0CX44-P0CX43);60S ribosomal protein L1- NA	11	16	17	19	21	20	11	18	19	24	20	20	17	15	19	16	21	13	21	11	12
d1131	d1131.a1	d1131.a1.a1	Chassy_SC_1852;N1P6P1;P43569; CCR4-associated factor 16 - CAF16	0	2	4	1	1	1	0	1	2	2	0	2	0	0	4	1	0	0	1	0	0
d1513	d1513.a1	d1513.a1.a1	Chassy_SC_1849;N1P9Q4;P53155; Uncharacterized protein YGL082W - YGL082W	0	1	0	0	1	0	0	0	1	0	3	0	0	0	0	0	0	0	1	0	0
c660	c660.a1	c660.a1.a1	Chassy_SC_1847;N1P6H1;P21734; Ubiquitin-conjugating enzyme E2 1 - UBC1	1	4	4	6	6	5	1	7	6	5	6	5	0	0	3	3	8	3	8	0	0
d1316	d1316.a1	d1316.a1.a1	Chassy_SC_1841;N1NY29;P21182; S-adenosylmethionine decarboxylase proenzyme - SPE2	0	0	2	0	0	0	0	1	2	1	0	0	0	0	1	4	1	0	1	0	0
d1004	d1004.a1	d1004.a1.a1	Chassy_SC_1840;N1PAI5;Q06336; ADP-ribosylation factor-binding protein GGA1 - GGA1	0	3	5	0	0	0	0	3	5	1	1	0	0	0	5	2	6	0	0	0	0
c106	c106.a1	c106.a1.a1	Chassy_SC_184;N1P4Y5;P38891; Branched-chain-amino-acid aminotransferase, mitochondrial - BAT1	8	21	20	21	22	15	12	24	21	21	20	24	10	13	17	17	21	12	23	12	8
c489	c489.a1	c489.a1.a1	Chassy_SC_1838;N1P0S2;P22146; 1,3-beta-glucanosyltransferase GAS1 - GAS1	3	7	9	5	7	10	2	6	7	11	5	11	4	2	7	6	11	6	11	3	2
d1869	d1869.a1	d1869.a1.a1	Chassy_SC_1836;N1P550;Q05636; Exosome complex component RRP45 - RRP45	0	0	0	1	0	0	0	0	0	0	0	1	0	0	0	0	0	0	0	0	0
d2064	d2064.a1	d2064.a1.a1	Chassy_SC_1833;N1P8F8;P32528; Urea amidolyase - DUR1,2	0	0	0	0	1	0	0	0	0	0	0	0	0	0	0	0	0	0	0	0	0
c804	c804.a1	c804.a1.a1	Chassy_SC_1832;N1P5V1;Q12408; Phosphatidylglycerol/phosphatidylinositol transfer protein - NPC2	0	4	4	2	3	1	0	4	3	2	4	1	0	0	5	7	10	0	3	0	0
c886	c886.a1	c886.a1.a1	Chassy_SC_1831;N1P597;P50109; Protein PSP2 - PSP2	0	2	5	3	4	1	0	3	2	2	4	5	0	0	4	2	3	0	3	0	0
d1645	d1645.a1	d1645.a1.a1	Chassy_SC_1830;N1P5N2;P40218; Uncharacterized protein YMR147W - YMR147W	0	0	1	0	0	0	0	0	1	0	0	0	0	0	1	0	1	0	0	0	0
c656	c656.a1	c656.a1.a1	Chassy_SC_1829;N1P648;P30822; Exportin-1 - CRM1	4	3	5	7	3	4	3	1	6	5	4	5	2	1	7	6	5	2	5	1	2
c292	c292.a1	c292.a1.a1	Chassy_SC_1824;N1P7S9;P00937; Multifunctional tryptophan biosynthesis protein - TRP3	5	14	12	15	16	14	8	15	16	15	13	13	6	7	9	13	19	10	17	3	5
d1642	d1642.a1	d1642.a1.a1	Chassy_SC_1822;N1P4Q7;Q00684; Tyrosine-protein phosphatase CDC14 - CDC14	0	0	1	1	0	0	0	0	1	0	0	0	0	0	0	0	1	0	0	0	0
c862	c862.a1	c862.a1.a1	Chassy_SC_182;N1P6S8;P14743; Glycylpeptide N-tetradecanoyltransferase - NMT1	1	1	2	5	1	3	1	1	2	5	1	5	1	1	1	2	1	2	7	1	1
d1890	d1890.a1	d1890.a1.a1	Chassy_SC_1819;N1NZV6;P14772;|reversed Bile pigment transporter 1 - BPT1	0	0	0	0	0	0	0	0	0	0	0	0	0	0	1	0	0	0	0	0	0
d1007	d1007.a1	d1007.a1.a1	Chassy_SC_1817;N1NXF7;P53925; Uncharacterized vacuolar membrane protein YNL115C - YNL115C	0	2	3	1	4	0	1	3	2	0	2	1	0	0	2	3	5	0	1	0	0
c576	c576.a2	c576.a2.a1	Chassy_SC_1813;N1P1T3;P41057; 40S ribosomal protein S29-A - RPS29A	2	2	3	2	5	3	1	3	1	2	4	2	1	1	3	2	2	1	4	1	1
d1408	d1408.a1	d1408.a1.a1	Chassy_SC_1810;N1NX13;Q99325; Autophagy-related protein 40 - ATG40	0	0	2	0	0	0	0	0	2	0	0	2	0	0	2	1	1	0	0	0	0
d1295	d1295.a1	d1295.a1.a1	Chassy_SC_181;N1P6R0;P38109; Putative serine carboxypeptidase YBR139W - YBR139W	0	1	1	1	2	0	0	1	1	1	2	0	0	0	0	1	1	0	1	0	0
d1250	d1250.a1	d1250.a1.a1	Chassy_SC_1807;N1NX39;Q02959; Histone deacetylase HOS3 - HOS3	0	0	3	1	2	0	0	1	2	0	1	1	0	0	2	0	1	0	1	0	0
d1063	d1063.a1	d1063.a1.a1	Chassy_SC_1806;N1NYP7;P54730; UBX domain-containing protein 4 - UBX4	0	3	2	4	3	0	0	0	3	2	2	0	0	0	1	1	1	0	3	0	0
d1268	d1268.a1	d1268.a1.a1	Chassy_SC_1805;N1P7E8;Q12743; DER1-like family member protein 1 - DFM1	0	1	3	0	1	1	0	1	1	0	0	2	0	1	0	1	2	0	0	0	0
c899	c899.a1	c899.a1.a1	Chassy_SC_180;N1NWC7;Q01855; 40S ribosomal protein S15 - RPS15	0	4	3	3	4	2	1	2	2	2	2	3	1	1	3	2	4	0	2	0	0
c541	c541.a1	c541.a1.a1	Chassy_SC_1797;N1PAL9;P32771; S-(hydroxymethyl)glutathione dehydrogenase - SFA1	2	7	7	8	7	3	3	7	7	9	7	3	3	4	7	8	7	3	10	2	1
d1582	d1582.a1	d1582.a1.a1	Chassy_SC_1794;N1NVH3;P48582; Vacuolar-sorting protein BRO1 - BRO1	0	0	3	1	0	0	0	0	1	0	0	0	0	0	1	0	0	0	0	0	0
d1574	d1574.a1	d1574.a1.a1	Chassy_SC_1793;N1P707;P32831; Negative growth regulatory protein NGR1 - NGR1	0	0	1	0	0	0	0	0	2	0	0	0	0	0	0	0	3	0	0	0	0
d1966	d1966.a1	d1966.a1.a1	Chassy_SC_1791;N1NZ48;Q12291; 25S rRNA (uridine(2843)-N(3))-methyltransferase - BMT6	0	0	0	1	0	0	0	0	0	0	0	0	0	0	0	0	0	0	0	0	0
d1699	d1699.a1	d1699.a1.a1	Chassy_SC_1784;N1P097;Q12745; Protein transport protein SEC39 - SEC39	0	0	0	0	0	0	0	0	1	1	0	1	0	0	0	1	0	0	0	0	0
d1154	d1154.a1	d1154.a1.a1	Chassy_SC_1782;N1PA95;P38985; Signal recognition particle subunit SRP14 - SRP14	0	1	1	1	2	1	0	2	1	1	3	0	0	0	1	2	2	0	2	0	0
d1371	d1371.a1	d1371.a1.a1	Chassy_SC_1778;N1PAQ0;P25371; Probable ATP-dependent permease - ADP1	0	1	1	0	1	1	0	0	1	2	0	0	0	0	1	1	1	1	0	0	0
c784	c784.a1	c784.a1.a1	Chassy_SC_1777;N1P7Z3;CENPK specific;No description in SC288c, annotation and gene name in CENPK: Etr1p -CENPK1137D_4571	1	3	6	3	4	2	0	4	5	3	5	2	1	1	3	3	4	0	4	1	1
d1888	d1888.a1	d1888.a1.a1	Chassy_SC_1771;N1NVH2;Q02895;|reversed Putative aryl-alcohol dehydrogenase AAD16 - AAD16	0	0	1	0	0	0	0	0	0	0	0	0	0	0	0	0	0	0	0	0	0
c711	c711.a2	c711.a2.a1	Chassy_SC_177;N1PA28;P23337; Glycogen [starch] synthase isoform 1 - GSY1	1	1	1	0	0	6	0	1	2	0	2	11	0	0	1	1	4	3	0	0	0
d1221	d1221.a1	d1221.a1.a1	Chassy_SC_1767;N1PAW0;P33759; 37S ribosomal protein S5, mitochondrial - MRPS5	0	2	0	1	2	0	0	1	1	1	2	0	0	0	1	1	1	2	1	0	0
c280	c280.a1	c280.a1.a1	Chassy_SC_1756;N1P9M2;P33734; Imidazole glycerol phosphate synthase hisHF - HIS7	7	16	14	12	16	13	5	19	17	14	19	12	5	5	7	14	21	10	18	6	7
d1312	d1312.a1	d1312.a1.a1	Chassy_SC_1752;N1P8A4;P36051; GPI ethanolamine phosphate transferase 1 - MCD4	0	1	2	1	1	1	0	0	1	1	0	1	0	0	1	1	1	0	1	0	0
c741	c741.a1	c741.a1.a1	Chassy_SC_1751;N1P4U9;P38861; 60S ribosomal export protein NMD3 - NMD3	1	4	4	4	5	3	0	4	5	3	2	4	0	2	5	6	3	1	5	0	1
c487	c487.a1	c487.a1.a1	Chassy_SC_1749;N1NYY3;P38911; FK506-binding nuclear protein - FPR3	2	5	5	7	6	4	3	6	6	4	9	5	3	2	5	4	7	4	8	3	3
d1559	d1559.a1	d1559.a1.a1	Chassy_SC_1747;N1NWI5;Q01454; DNA polymerase alpha-binding protein - CTF4	0	0	3	0	0	0	0	0	1	1	0	0	0	0	1	0	0	0	0	0	0
c662	c662.a1	c662.a1.a1	Chassy_SC_1746;N1P9N9;P38152; Tricarboxylate transport protein - CTP1	1	7	5	6	5	5	0	4	6	5	5	4	0	0	3	7	7	3	8	0	0
d2058	d2058.a1	d2058.a1.a1	Chassy_SC_1745;N1P8T4;P45976; Pre-mRNA polyadenylation factor FIP1 - FIP1	0	0	0	0	0	0	0	0	0	0	0	0	0	0	0	0	0	0	1	0	0
d1905	d1905.a1	d1905.a1.a1	Chassy_SC_1740;N1P0B7;P47173; Uncharacterized protein YJR142W - YJR142W	0	0	0	0	0	0	0	1	0	0	0	0	0	0	0	0	0	0	0	0	0
c627	c627.a1	c627.a1.a1	Chassy_SC_174;N1NWK0;P07260; Eukaryotic translation initiation factor 4E - CDC33	0	7	8	8	8	4	0	5	5	6	4	6	0	0	5	8	5	3	6	0	0
d1996	d1996.a1	d1996.a1.a1	Chassy_SC_1739;N1NXG6;P32798; Cobalt uptake protein COT1 - COT1	0	0	0	0	0	0	0	0	0	0	0	0	0	0	0	0	0	0	1	0	0
c842	c842.a1	c842.a1.a1	Chassy_SC_1738;N1NWR4;P12687; 54S ribosomal protein L2, mitochondrial - MRP7	1	4	3	0	6	3	0	3	2	2	5	3	0	1	3	3	4	2	2	0	0
c309	c309.a1	c309.a1.a1	Chassy_SC_173;N1P2U9;P07275; Delta-1-pyrroline-5-carboxylate dehydrogenase, mitochondrial - PUT2	8	10	14	20	18	7	7	14	16	18	14	3	7	3	9	15	18	2	19	6	6
c407	c407.a1	c407.a1.a1	Chassy_SC_1726;N1NYS7;Q04458; Fatty aldehyde dehydrogenase HFD1 - HFD1	3	9	13	8	12	5	7	8	12	10	10	8	6	6	9	8	13	3	10	3	8
d1781	d1781.a1	d1781.a1.a1	Chassy_SC_1723;N1P1E9;P47077; Nucleolar protein 9 - NOP9	0	1	0	0	0	0	0	0	0	0	0	0	0	0	0	0	1	0	0	0	0
c513	c513.a1	c513.a1.a1	Chassy_SC_1721;N1P5K4;P39986; Manganese-transporting ATPase 1 - SPF1	4	5	10	9	5	9	1	3	10	11	2	10	2	3	6	10	9	6	8	1	3
d1167	d1167.a1	d1167.a1.a1	Chassy_SC_1720;N1P520;P00127; Cytochrome b-c1 complex subunit 6 - QCR6	1	1	1	1	2	0	1	1	1	1	1	0	1	1	1	1	1	0	1	1	1
d1518	d1518.a1	d1518.a1.a1	Chassy_SC_1717;N1P1R0;CENPK specific;No description in SC288c, annotation and gene name in CENPK: Rpl39p -CENPK1137D_1406	0	1	0	0	1	1	0	0	0	0	1	0	1	0	1	0	0	0	1	0	0
c710	c710.a1	c710.a1.a1	Chassy_SC_1716;N1P053;P32458; Cell division control protein 11 - CDC11	0	3	5	3	6	3	1	5	5	3	7	4	0	0	5	4	7	4	5	0	0
c584	c584.a1	c584.a1.a1	Chassy_SC_1715;N1NZR7;P53731; Actin-related protein 2/3 complex subunit 2 - ARC35	1	7	8	5	7	3	2	4	9	5	5	8	3	1	7	7	7	3	5	2	2
d1319	d1319.a1	d1319.a1.a1	Chassy_SC_1714;N1NXR1;P40169; Uncharacterized plasma membrane protein YNL194C - YNL194C	0	1	1	1	2	0	0	0	1	1	1	0	0	0	1	1	1	0	1	0	0
c306	c306.a1	c306.a1.a1	Chassy_SC_1710;N1NY37;P02407; 40S ribosomal protein S17-A - RPS17A	8	12	12	12	13	12	9	11	9	12	16	13	8	10	12	12	12	9	12	12	10
c447	c447.a1	c447.a1.a1	Chassy_SC_171;N1NX64;P41921; Glutathione reductase - GLR1	1	7	8	8	9	5	2	12	13	17	13	7	2	3	7	13	9	3	12	0	2
d1022	d1022.a1	d1022.a1.a1	Chassy_SC_1709;N1P6J5;P30657; Proteasome subunit beta type-7 - PRE4	0	1	1	2	3	1	0	2	1	2	2	1	0	0	1	2	4	0	6	0	0
b30	b30.a2	b30.a2.a1	Chassy_SC_1705;N1P0E7;P54113; Bifunctional purine biosynthesis protein ADE16 - ADE16	12	24	22	20	26	26	9	27	24	25	30	23	10	10	22	28	27	18	30	12	8
c358	c358.a1	c358.a1.a1	Chassy_SC_1701;N1P5D9;P32775; 1,4-alpha-glucan-branching enzyme - GLC3	6	13	18	1	16	11	6	15	17	0	11	11	2	3	16	19	15	12	0	4	3
d1697	d1697.a1	d1697.a1.a1	Chassy_SC_1700;N1P8X7;P27637; Bud site selection protein 14 - BUD14	0	0	1	1	0	0	0	0	0	0	0	0	0	0	0	0	1	0	1	0	0
d1342	d1342.a1	d1342.a1.a1	Chassy_SC_1699;N1P686;Q04969; Signal peptidase complex subunit SPC2 - SPC2	0	1	1	1	1	1	0	1	1	0	1	1	0	0	0	1	2	0	0	0	0
d1350	d1350.a1	d1350.a1.a1	Chassy_SC_1690;N1PA75;P39993; ARF guanine-nucleotide exchange factor 2 - GEA2	0	0	2	2	1	1	0	0	1	1	0	2	0	0	0	1	0	0	1	0	0
c414	c414.a1	c414.a1.a1	Chassy_SC_1689;N1P706;P40053; Altered inheritance of mitochondria protein 9, mitochondrial - AIM9	4	10	13	11	15	7	3	9	8	11	12	9	2	2	7	12	11	1	16	3	2
d1908	d1908.a1	d1908.a1.a1	Chassy_SC_1688;N1P4Y4;P07834; Cell division control protein 4 - CDC4	0	0	0	0	0	0	0	0	0	0	0	0	0	0	0	1	0	0	0	0	0
d1934	d1934.a1	d1934.a1.a1	Chassy_SC_1685;N1P592;P32617; Chromatin-remodeling complex subunit IES6 - IES6	0	0	0	0	0	0	0	0	0	0	0	0	0	0	0	0	0	0	1	0	0
d1365	d1365.a1	d1365.a1.a1	Chassy_SC_1684;N1P4A8;P40956; Protein GTS1 - GTS1	0	0	2	0	1	1	0	0	0	1	0	2	0	0	0	0	2	1	1	0	0
c958	c958.a1	c958.a1.a1	Chassy_SC_1683;N1NWG6;P53889; Uncharacterized mitochondrial hydrolase FMP41 - FMP41	0	3	3	1	4	3	0	3	5	0	3	3	0	0	3	2	1	1	1	0	0
d1990	d1990.a1	d1990.a1.a1	Chassy_SC_1682;N1P8W0;P31109; Synaptobrevin homolog 1 - SNC1	0	0	0	1	0	0	0	0	0	0	0	0	0	0	0	0	0	0	0	0	0
d1014	d1014.a1	d1014.a1.a1	Chassy_SC_1678;N1P9K3;P38732; Protein-lysine N-methyltransferase EFM1 - EFM1	0	3	2	3	1	3	0	0	1	4	0	3	0	0	0	0	4	1	5	0	0
c897	c897.a1	c897.a1.a1	Chassy_SC_1676;N1P5D6;P40202; Superoxide dismutase 1 copper chaperone - CCS1	0	2	3	3	3	4	0	2	1	2	3	4	0	0	2	4	2	3	4	0	0
c754	c754.a1	c754.a1.a1	Chassy_SC_1675;N1NXY3;P21560; Protein CBP3, mitochondrial - CBP3	2	3	5	4	4	3	1	5	3	3	4	3	1	1	4	4	4	2	3	0	0
c490	c490.a1	c490.a1.a1	Chassy_SC_1673;N1P6U3;P09457; ATP synthase subunit 5, mitochondrial - ATP5	5	7	5	9	8	8	4	8	6	10	9	7	4	3	4	8	7	6	10	3	4
d1606	d1606.a1	d1606.a1.a1	Chassy_SC_1671;N1NW31;Q02884; Elongator complex protein 4 - ELP4	0	0	0	0	0	0	0	1	0	1	0	1	0	0	0	1	0	0	1	0	0
d1299	d1299.a1	d1299.a1.a1	Chassy_SC_1670;N1NYZ6;Q07915; Ribosome biogenesis protein RLP24 - RLP24	0	0	1	1	2	0	0	1	1	2	0	1	0	1	0	1	1	0	1	0	0
d1278	d1278.a1	d1278.a1.a1	Chassy_SC_167;N1P6Y0;P52286; Suppressor of kinetochore protein 1 - SKP1	0	0	1	0	0	0	0	1	1	3	2	0	0	0	2	1	1	0	2	0	0
b88	b88.a1	b88.a1.a1	Chassy_SC_1668;N1PAU7;P09436; Isoleucine--tRNA ligase, cytoplasmic - ILS1	22	26	27	32	29	35	23	27	34	33	26	40	17	20	30	32	29	31	34	14	12
b39	b39.a2	b39.a2.a1	Chassy_SC_1667;N1P4G1;P53319; 6-phosphogluconate dehydrogenase, decarboxylating 2 - GND2	12	23	26	24	27	11	12	22	28	23	29	11	8	9	22	27	29	8	28	15	8
c540	c540.a1	c540.a1.a1	Chassy_SC_1665;N1P0G5;P36114; Mitochondrial outer membrane protein YKR018C - YKR018C	3	6	9	5	5	7	3	6	6	5	4	6	4	3	9	7	6	6	6	4	5
c486	c486.a1	c486.a1.a1	Chassy_SC_1663;N1P9S0;P02294; Histone H2B.2 - HTB2	3	7	7	6	8	5	6	7	7	4	10	9	4	4	8	8	11	5	8	4	5
c232	c232.a1	c232.a1.a1	Chassy_SC_1662;N1P7X6;P36013; NAD-dependent malic enzyme, mitochondrial - MAE1	11	10	12	15	15	32	9	12	14	14	16	37	7	8	8	15	17	21	23	6	7
d1024	d1024.a1	d1024.a1.a1	Chassy_SC_1658;N1NXK4;P32331; Carrier protein YMC1, mitochondrial - YMC1	0	3	4	3	3	0	0	1	1	3	2	0	0	0	1	1	5	0	2	0	0
c847	c847.a1	c847.a1.a1	Chassy_SC_1656;N1P999;P25343; Reduced viability upon starvation protein 161 - RVS161	3	2	3	3	3	2	1	3	3	2	2	3	1	1	2	3	3	2	4	1	0
d1006	d1006.a1	d1006.a1.a1	Chassy_SC_1655;N1P7F4;Q03430; 37S ribosomal protein RSM28, mitochondrial - RSM28	0	2	2	1	6	0	0	0	3	2	5	0	0	0	0	1	4	0	5	0	0
c286	c286.a2	c286.a2.a1	Chassy_SC_1654;N1P4E6;P48164; 40S ribosomal protein S7-B - RPS7B	1	4	7	6	7	6	1	4	8	7	6	5	1	0	6	8	5	3	5	1	1
c956	c956.a1	c956.a1.a1	Chassy_SC_1651;N1P058;P28321; Monoglyceride lipase - YJU3	0	2	3	4	2	0	1	3	3	1	4	1	0	0	1	3	4	0	4	0	0
d1208	d1208.a1	d1208.a1.a1	Chassy_SC_165;N1P976;P25655; General negative regulator of transcription subunit 1 - CDC39	0	1	2	2	0	2	0	0	2	1	0	0	0	0	3	0	2	0	2	0	0
d1284	d1284.a1	d1284.a1.a1	Chassy_SC_1648;N1NWG8;P32453; Protein ATP11, mitochondrial - ATP11	0	1	1	1	1	1	0	0	1	0	3	1	0	0	1	1	1	1	0	0	0
d1870	d1870.a1	d1870.a1.a1	Chassy_SC_1642;N1P763;P22134; DNA-3-methyladenine glycosylase - MAG1	0	0	0	0	1	0	0	0	0	0	0	0	0	0	0	0	1	0	0	0	0
d1440	d1440.a1	d1440.a1.a1	Chassy_SC_1641;N1P5T6;P10622; 60S acidic ribosomal protein P1-beta - RPP1B	0	0	1	1	1	1	0	0	0	1	1	0	0	0	1	0	1	0	0	1	0
c610	c610.a1	c610.a1.a1	Chassy_SC_1640;N1PA37;P40029; Peptide methionine sulfoxide reductase - MXR1	2	8	7	4	7	0	3	5	7	3	9	2	2	3	7	6	6	0	4	3	3
c818	c818.a1	c818.a1.a1	Chassy_SC_1637;N1P5B6;P10662; 37S ribosomal protein MRP1, mitochondrial - MRP1	1	3	3	3	4	5	0	4	4	3	3	4	0	0	2	3	3	2	4	0	0
c399	c399.a1	c399.a1.a1	Chassy_SC_1636;N1P361;P35191; DnaJ homolog 1, mitochondrial - MDJ1	5	7	16	10	11	8	4	10	12	11	10	7	3	5	12	7	14	9	10	2	1
b99	b99.a1	b99.a1.a1	Chassy_SC_1634;N1NZQ8;P39015; Suppressor protein STM1 - STM1	14	28	29	30	33	32	13	26	26	32	27	35	16	13	26	30	30	33	30	13	14
d1546	d1546.a1	d1546.a1.a1	Chassy_SC_1632;N1NX83;P25298; mRNA 3'-end-processing protein RNA14 - RNA14	0	0	1	1	0	0	0	0	1	1	0	1	0	0	0	0	1	0	1	0	0
d1023	d1023.a1	d1023.a1.a1	Chassy_SC_1628;N1P5H0;P30771; ATP-dependent helicase NAM7 - NAM7	0	2	5	0	2	2	0	2	4	0	1	1	0	0	2	2	4	0	2	0	0
c774	c774.a1	c774.a1.a1	Chassy_SC_1626;N1P3D8;P87262; 60S ribosomal protein L34-A - RPL34A	2	4	3	4	3	3	3	2	3	3	2	3	3	2	3	2	3	2	2	3	2
c658	c658.a1	c658.a1.a1	Chassy_SC_1625;N1NY98;P20485; Choline kinase - CKI1	0	3	6	3	5	4	1	4	6	5	2	5	0	0	10	5	9	3	9	0	1
d1536	d1536.a1	d1536.a1.a1	Chassy_SC_1624;N1NWR5;Q08199; Nucleotide exchange factor SIL1 - SIL1	0	1	0	1	0	0	0	0	0	1	1	0	0	0	0	0	0	0	3	0	0
d1692	d1692.a1	d1692.a1.a1	Chassy_SC_1622;N1P003;P36523; 54S ribosomal protein L15, mitochondrial - MRPL15	0	0	0	2	0	0	0	0	0	0	0	0	0	0	0	0	0	1	1	0	0
d1678	d1678.a1	d1678.a1.a1	Chassy_SC_162;N1P6F5;P13587; Sodium transport ATPase 1 - ENA1	0	0	0	3	0	0	0	0	0	0	0	0	0	0	0	0	0	0	1	0	0
d1670	d1670.a1	d1670.a1.a1	Chassy_SC_1619;N1P335;P20676; Nucleoporin NUP1 - NUP1	0	0	3	0	0	0	0	0	0	0	0	0	0	0	1	0	0	0	0	0	0
d2010	d2010.a1	d2010.a1.a1	Chassy_SC_1618;N1P9B9;P38172; MIOREX complex component 3 - MRX3	0	0	1	0	0	0	0	0	0	0	0	0	0	0	0	0	0	0	0	0	0
d1586	d1586.a1	d1586.a1.a1	Chassy_SC_1612;N1NWL0;Q12453; Cytoplasmic export protein 1 - CEX1	0	0	2	1	0	0	0	0	1	0	0	1	0	0	1	0	0	0	0	0	0
d1636	d1636.a1	d1636.a1.a1	Chassy_SC_1605;N1P6X2;P38300; Inner membrane mitoribosome receptor MBA1, mitochondrial - MBA1	0	0	0	1	1	0	0	0	0	1	0	0	0	0	0	0	1	0	1	0	0
d1293	d1293.a1	d1293.a1.a1	Chassy_SC_1600;N1NZS0;Q06705; Phosphatidylinositol transfer protein CSR1 - CSR1	0	0	0	1	1	3	0	1	1	1	0	3	0	0	0	0	0	1	1	0	0
c484	c484.a1	c484.a1.a1	Chassy_SC_160;N1P117;P10963; Phosphoenolpyruvate carboxykinase (ATP) - PCK1	5	3	14	19	1	2	3	4	11	22	1	1	4	2	15	2	8	0	20	1	1
c135	c135.a1	c135.a1.a1	Chassy_SC_16;N1NZ63;P80210; Adenylosuccinate synthetase - ADE12	12	17	19	26	22	24	17	21	19	31	22	30	15	15	20	24	27	20	28	11	13
[truncated: 250 more rows]

## Sheet: proteins
Supporting information File S-1. X!Tandempipeline results of the identified proteins
Combined mode of samples: standard (T2), high temperature (T3), osmotic shock (T4), low pH (T5), anaerobic (T6) and three replicates for each condition (A, B, C). Plus 6 bulk samples (Bulk, A-F)
Parameters of X!TandemPipeline :		Results from X!Tandem Alanine (version 2017.02.01, http://www.thegpm.org/tandem/)
		Parser 3.4.3 developed by PAPPSO platform (http://pappso.inra.fr/bioinfo/)
	Modifications:	Carbamidomethylation of Cys residues = +57.0214
		Oxidation of Met residues = +15.99
	Databases:	S cerevisiae CEN.PK113-7D from : https://www.uniprot.org, september 2017, 5439 protein entries.
		UPS proteins databse from : https://www.sigmaaldrich.com/life-science/proteomics/mass-spectrometry/ups1-and-ups2-proteomic.html, 48 protein entries
		Contaminants database (keratins, BSA... etc)
	Filters:	Filters for the parser X!Tandem : Maximal peptide Evalue to compare and filter proteins : 0.01
		Minimal number of unique peptides to conserve a protein : 1
		Maximal protein log(Evalue) to conserve a protein : -3
Table informations:
	Group ID	The Group to which the protein belongs. All the proteins in a group have at least one peptide in common.
	Sub -Group ID	The Sub-Group to which the protein belongs. All the proteins in a sub-group are identifed with the same valid peptides.
	Protein ID	A single reference to the protein in this grouping experiment (unique within a sample in individual mode).
	Description	Protein description as it appears in the header of the fastafile.
	log(E-Value)	Protein E-value expressed in log.
		Statistical value representing the number of times this protein would be identfied randomly.
		Calculated as the product of unique peptide E-values in the sample.
	Coverage	% of protein coverage.
	MW	Molecular weight of the protein expressed in KDa.
	size	The number of amino acid of the protein sequence.
	Spectra	The total number of spectra assigned by the identification engine to this protein.
	Specfic	The total number of spectra that are specific to this subgroup of proteins. It is only available if there are more than one subgroup within a group.
	Uniques	The number of unique peptide sequence assigned to this protein.
	Specific uniques	The number of unique peptide sequence specific to this subgroup of proteins. It is only available if there are more than one subgroup within a group.
	Uniques peptide-mod-charge	The number of unique peptide assigned to this protein, counting separately sequences obtained with di erent modi cations and charges.
	Theoretical number of tryptic peptides	Theoretical number of tryptic peptides in this protein.
	PAI	Protein Abundance Index :
		PAI estimates the relative abundance of the protein.
		PAI is calculated as the number of identified spectra divided by the number of theoretical tryptic peptides.
	emPAI	the emPAI is a PAI transformation such as: emPAI = 10 Exp(PAI )-1.
	spectral count AI	Abundance index computed as the number of spectra assigned to the protein divided by the number of theoretical tryptic peptides
	Sub-group proteins	The number of proteins in this subgroup.
	Number of MS samples	The number of MS samples in which this protein was identfied.
Group ID	Sub-group ID	Protein ID	Description	log(E value)	Coverage	MW	size	Spectra	Specific	Uniques	Specific uniques	Uniques peptide-mod-charge	Theoretical number of tryptic peptides	PAI	emPAI	spectral count AI	Sub-group proteins	number of MS samples
d1172	d1172.a1	d1172.a1.a1	Q15843ups|NEDD8_HUMAN_UPS NEDD8 (Chain 1-81) - Homo sapiens (Human)	-16.1427	17	9	81	19		2		3	3	1	9	6.33333	1	6
c124	c124.a1	c124.a1.a1	Q06830ups|PRDX1_HUMAN_UPS Peroxiredoxin 1 (Chain 2-199) - Homo sapiens (Human)	-109.823	42	21.9	198	459		15		31	10	3.1	1257.93	45.9	1	6
b85	b85.a1	b85.a1.a1	P69905ups|HBA_HUMAN_UPS Hemoglobin subunit alpha (Chain 2-142) - Homo sapiens (Human)	-163.77	76	15	141	587		22		32	4	8	99999999	146.75	1	6
b48	b48.a1	b48.a1.a1	P68871ups|HBB_HUMAN_UPS Hemoglobin subunit beta (Chain 2-147) - Homo sapiens (Human)	-211.221	82	15.8	146	836		26		32	11	2.90909	810.131	76	1	6
c824	c824.a1	c824.a1.a1	P63279ups|UBC9_HUMAN_UPS SUMO-conjugating enzyme UBC9 (Chain 1-158) - Homo sapiens (Human)	-25.7934	28	17.9	158	50		4		7	5	1.4	24.1189	10	1	6
c160	c160.a1	c160.a1.a1	P63165ups|SUMO1_HUMAN_UPS Small ubiquitin-related modifier 1 (Chain 1-97, N-terminal GST tag) - Homo sapiens (Human)	-138.231	46	38.7	336	384		20		34	17	2	99	22.5882	1	6
c137	c137.a3	c137.a3.a1	P62988ups|UBIQ_HUMAN_UPS Ubiquitin (Chain 1-76, N-terminal His tag) - Homo sapiens (Human)	-62.7176	63	10.6	96	219	93	9	2	11	6	1.83333	67.1292	36.5	1	6
c192	c192.a1	c192.a1.a1	P62937ups|PPIA_HUMAN_UPS Peptidyl-prolyl cis-trans isomerase A (Chain 1-165, N terminal His tag)- Homo sapiens (Human)	-45.4096	30	20.1	185	348		6		11	8	1.375	22.7137	43.5	1	6
d1369	d1369.a1	d1369.a1.a1	P61626ups|LYSC_HUMAN_UPS Lysozyme C (Chain 19-148) - Homo sapiens (Human)	-10.3098	9	14.6	130	11		1		1	6	0.166667	0.467799	1.83333	1	6
d1462	d1462.a1	d1462.a1.a1	P55957ups|BID_HUMAN_UPS BH3-interacting domain death agonist (Chain 1-195) - Homo sapiens (Human)	-7.11919	6	21.9	195	8		1		1	9	0.111111	0.29155	0.888889	1	6
b37	b37.a1	b37.a1.a1	P41159ups|LEP_HUMAN_UPS Leptin (Chain 22-167) - Homo sapiens (Human)	-167.491	66	16.1	147	993		20		30	6	5	99999	165.5	1	6
c635	c635.a1	c635.a1.a1	P16083ups|NQO2_HUMAN_UPS Ribosyldihydronicotinamide dehydrogenase [quinone] (Chain 2-231) - Homo sapiens (Human)	-61.3761	42	25.7	230	86		8		13	11	1.18182	14.1991	7.81818	1	6
c329	c329.a1	c329.a1.a1	P15559ups|NQO1_HUMAN_UPS NAD(P)H dehydrogenase [quinone] 1 (Chain 2-274) - Homo sapiens (Human)	-180.829	51	30.6	273	223		22		29	10	2.9	793.328	22.3	1	6
c157	c157.a2	c157.a2.a1	P12081ups|SYHC_HUMAN_UPS Histidyl-tRNA synthetase, cytoplasmic (Chain 1-509, C terminal His tag) - Homo sapiens (Human)	-140.989	41	58.1	515	162	144	22	20	26	24	1.08333	11.1153	6.75	1	6
d1524	d1524.a1	d1524.a1.a1	P10599ups|THIO_HUMAN_UPS Thioredoxin (Chain 2-105, N-terminal His tag)- Homo sapiens (Human)	-8.19382	11	12.3	110	7		1		1	7	0.142857	0.389495	1	1	6
c381	c381.a1	c381.a1.a1	P06732ups|KCRM_HUMAN_UPS Creatine kinase M-type (Chain 1-381) - Homo sapiens (Human)	-116.865	37	43	381	185		13		19	18	1.05556	10.3646	10.2778	1	6
d1327	d1327.a1	d1327.a1.a1	P06396ups|GELS_HUMAN_UPS Gelsolin (Chain 28-782) - Homo sapiens (Human)	-16.8537	6	82.8	755	12		3		3	23	0.130435	0.350314	0.521739	1	6
c121	c121.a1	c121.a1.a1	P04040ups|CATA_HUMAN_UPS Catalase (Chain 2-527) - Homo sapiens (Human)	-316.229	57	59.5	526	466		41		54	26	2.07692	118.378	17.9231	1	6
d1941	d1941.a1	d1941.a1.a1	P02787ups|TRFE_HUMAN_UPS Serotransferrin (Chain 20-698) - Homo sapiens (Human)	-4.46852	1	75	679	1		1		1	38	0.0263158	0.0624678	0.0263158	1	1
c964	c964.a1	c964.a1.a1	P02753ups|RETBP_HUMAN_UPS Retinol-binding protein 4 (Chain 19-201) - Homo sapiens (Human)	-13.2161	11	20.5	179	35		2		2	6	0.333333	1.15443	5.83333	1	6
c412	c412.a1	c412.a1.a1	P02144ups|MYG_HUMAN_UPS Myoglobin (Chain 2-154) - Homo sapiens (Human)	-94.0944	46	17	153	169		11		17	9	1.88889	76.4264	18.7778	1	6
d1548	d1548.a1	d1548.a1.a1	P01031ups|CO5_HUMAN_UPS Complement C5 (C5a anaphylatoxin) (Chain 678-751) - Homo sapiens (Human)	-5.14267	10	8.2	74	6		1		1	2	0.5	2.16228	3	1	6
c883	c883.a1	c883.a1.a1	P01008ups|ANT3_HUMAN_UPS Antithrombin-III (Chain 33-464) - Homo sapiens (Human)	-43.069	19	48.9	432	43		7		9	22	0.409091	1.56502	1.95455	1	6
a8	a8.a1	a8.a1.a1	P00918ups|CAH2_HUMAN_UPS Carbonic anhydrase 2 (Chain 2-260) - Homo sapiens (Human)	-388.176	73	29	259	1872		48		68	12	5.66667	464158	156	1	6
b22	b22.a1	b22.a1.a1	P00915ups|CAH1_HUMAN_UPS Carbonic anhydrase 1 (Chain 2-261) - Homo sapiens (Human)	-353.063	80	28.6	260	1365		45		67	12	5.58333	383118	113.75	1	6
d1562	d1562.a1	d1562.a1.a1	P00709ups|LALBA_HUMAN_UPS Alpha-lactalbumin (Chain 20-142) - Homo sapiens (Human)	-4.45593	7	14	123	6		1		1	6	0.166667	0.467799	1	1	6
c595	c595.a1	c595.a1.a1	P00167ups|CYB5_HUMAN_UPS Cytochrome b5 (Chain 1-134, N-terminal His tag) - Homo sapiens (Human)	-67.7666	46	16.1	140	96		6		10	6	1.66667	45.4159	16	1	6
d1011	d1011.a1	d1011.a1.a1	O76070ups|SYUG_HUMAN_UPS Gamma-synuclein (Chain 1-127) - Homo sapiens (Human)	-33.8882	43	15.4	147	30		4		5	10	0.5	2.16228	3	1	6
c937	c937.a1	c937.a1.a1	Chassy_SC_992;N1P8D6;P28273; 5-oxoprolinase - OXP1	-27.8257	4	140.2	1286	38		5		5	62	0.0806452	0.204052	0.612903	1	14
d1439	d1439.a1	d1439.a1.a1	Chassy_SC_987;N1NZA6;P32329; Aspartic proteinase 3 - YPS1	-3.95861	1	59.9	569	9		1		1	5	0.2	0.584893	1.8	1	8
d1129	d1129.a1	d1129.a1.a1	Chassy_SC_986;N1NXC0;Q03088; Styryl dye vacuolar localization protein 3 - SVL3	-25.0494	6	95	850	22		4		4	30	0.133333	0.359356	0.733333	1	10
d1902	d1902.a1	d1902.a1.a1	Chassy_SC_985;N1NVS7;Q12108; Restriction of telomere capping protein 5 - RTC5	-3.85387	1	64.2	567	1		1		1	27	0.037037	0.089023	0.037037	1	1
d1991	d1991.a1	d1991.a1.a1	Chassy_SC_984;N1NWZ3;P41735; 5-demethoxyubiquinone hydroxylase, mitochondrial - CAT5	-2.79588	5	26	233	1		1		1	10	0.1	0.258925	0.1	1	1
c276	c276.a1	c276.a1.a1	Chassy_SC_980;N1NYG2;P40217; Eukaryotic translation initiation factor 3 subunit I - TIF34	-136.406	68	38.6	347	258		19		21	18	1.16667	13.678	14.3333	1	21
c698	c698.a1	c698.a1.a1	Chassy_SC_98;N1NX22;Q03028; Mitochondrial 2-oxodicarboxylate carrier 1 - ODC1	-47.7384	32	34.1	310	73		7		7	15	0.466667	1.92864	4.86667	1	21
d2091	d2091.a1	d2091.a1.a1	Chassy_SC_977;N1PA78;P40002; Transcriptional regulator MIT1 - MIT1	-3.72125	2	72.4	666	1		1		1	8	0.125	0.333521	0.125	1	1
c694	c694.a1	c694.a1.a1	Chassy_SC_975;N1NZ02;Q08818; Meiotic sister-chromatid recombination protein 6, mitochondrial - MSC6	-60.0904	19	79.8	692	74		10		10	35	0.285714	0.930698	2.11429	1	18
c586	c586.a1	c586.a1.a1	Chassy_SC_974;N1NVW9;Q08686; Thiosulfate sulfurtransferase TUM1 - TUM1	-67.7552	43	34.1	304	101		13		13	20	0.65	3.46684	5.05	1	17
c237	c237.a1	c237.a1.a1	Chassy_SC_973;N1P6Z9;Q06151; m7GpppX diphosphatase - DCS1	-85.2034	43	40.7	350	186	137	14	12	16	21	0.761905	4.77969	8.85714	1	21
d1865	d1865.a1	d1865.a1.a1	Chassy_SC_972;N1P0U9;Q02204; 54S ribosomal protein L13, mitochondrial - MRPL13	-2.42022	5	30.2	264	2		1		1	10	0.1	0.258925	0.2	1	2
d1827	d1827.a1	d1827.a1.a1	Chassy_SC_971;N1NYB3;P53829; Protein CAF40 - CAF40	-3.38722	2	41	373	2		1		1	16	0.0625	0.154782	0.125	1	2
d1163	d1163.a1	d1163.a1.a1	Chassy_SC_97;N1NVQ8;P38910; 10 kDa heat shock protein, mitochondrial - HSP10	-15.4182	34	11.3	106	20		3		3	5	0.6	2.98107	4	1	12
c708	c708.a1	c708.a1.a1	Chassy_SC_967;N1NZ21;P15274; AMP deaminase - AMD1	-47.7784	14	93.1	810	70		11		11	37	0.297297	0.982884	1.89189	1	16
d1273	d1273.a1	d1273.a1.a1	Chassy_SC_965;N1NVQ2;Q08096; RNA 3'-terminal phosphate cyclase-like protein - RCL1	-12.9592	11	40.1	367	14		4		4	20	0.2	0.584893	0.7	1	12
c104	c104.a2	c104.a2.a1	Chassy_SC_961;N1P1W7;Q12230; Sphingolipid long chain base-responsive protein LSP1 - LSP1	-116.803	46	38	341	204	182	14	13	15	15	1	9	13.6	1	21
d1180	d1180.a1	d1180.a1.a1	Chassy_SC_960;N1P1M6;P47125; Indoleamine 2,3-dioxygenase - BNA2	-53.9593	22	48.9	437	19		7		7	20	0.35	1.23872	0.95	1	7
c875	c875.a1	c875.a1.a1	Chassy_SC_953;N1P6Y8;P40040; Protein THO1 - THO1	-35.6853	48	24	218	44		5		5	5	1	9	8.8	1	15
d1855	d1855.a1	d1855.a1.a1	Chassy_SC_952;N1P8F4;P38132; DNA replication licensing factor MCM7 - MCM7	-8.22548	3	94.8	845	2		2		2	40	0.05	0.122018	0.05	1	2
d1386	d1386.a1	d1386.a1.a1	Chassy_SC_950;N1P1P4;P16370; DNA-directed RNA polymerase II subunit RPB3 - RPB3	-4.35655	3	35.2	318	10		1		1	12	0.0833333	0.211528	0.833333	1	10
d1564	d1564.a1	d1564.a1.a1	Chassy_SC_944;N1P7P7;P25382; Ribosome assembly protein 4 - RSA4	-12.2027	6	56.9	515	6		2		2	23	0.0869565	0.221677	0.26087	1	4
c778	c778.a1	c778.a1.a1	Chassy_SC_943;N1P2U1;P53095; D-serine dehydratase - DSD1	-45.5971	26	47.7	428	57		9		9	16	0.5625	2.65174	3.5625	1	12
b13	b13.a2	b13.a2.a1	Chassy_SC_941;N1P9V9;P26263; Pyruvate decarboxylase isozyme 3 - PDC6	-136.893	39	61.4	563	389	67	19	12	24	24	1	9	16.2083	1	21
c759	c759.a1	c759.a1.a1	Chassy_SC_940;N1P8G4;P47035; Nucleolar protein NET1 - NET1	-52.7015	13	128.3	1189	58		14		14	48	0.291667	0.957342	1.20833	1	19
c617	c617.a1	c617.a1.a1	Chassy_SC_939;N1NX56;Q12109; Tryptophan--tRNA ligase, cytoplasmic - WRS1	-70.6167	35	49.2	432	90		13		14	23	0.608696	3.06159	3.91304	1	21
d1701	d1701.a1	d1701.a1.a1	Chassy_SC_938;N1NWT3;P53725; M-phase phosphoprotein 6 homolog - MPP6	-2.35655	4	21.1	186	3		1		1	6	0.166667	0.467799	0.5	1	3
c278	c278.a1	c278.a1.a1	Chassy_SC_933;N1NW80;P54885; Gamma-glutamyl phosphate reductase - PRO2	-142.182	48	49.6	456	257		16		19	20	0.95	7.91251	12.85	1	21
d1805	d1805.a1	d1805.a1.a1	Chassy_SC_931;N1PA52;P40064; Nucleoporin NUP157 - NUP157	-2.33724	0	156.4	1391	2		1		1	59	0.0169492	0.0397984	0.0338983	1	2
c729	c729.a2	c729.a2.a1	Chassy_SC_929;N1P5G5;P32642; Monothiol glutaredoxin-4 - GRX4	-29.7449	18	27.4	244	27	18	4	3	4	9	0.444444	1.78256	3	1	13
c290	c290.a1	c290.a1.a1	Chassy_SC_928;N1P4H5;P51401; 60S ribosomal protein L9-B - RPL9B	-77.156	63	21.6	191	216	32	11	1	14	8	1.75	55.2341	27	1	21
d1568	d1568.a1	d1568.a1.a1	Chassy_SC_926;N1P2G7;P23293; Serine/threonine-protein kinase BUR1 - SGV1	-6.38722	1	74.1	657	6		1		1	40	0.025	0.0592537	0.15	1	6
d1800	d1800.a1	d1800.a1.a1	Chassy_SC_925;N1NXT2;Q06506; Ribosomal RNA-processing protein 9 - RRP9	-4	1	64.9	573	2		1		1	17	0.0588235	0.145048	0.117647	1	2
d1230	d1230.a1	d1230.a1.a2	Chassy_SC_92;N1P913;P04912; Histone H2A.2 - HTA2	-11.8389	29	13.9	132	15	12	3	2	3	4	0.75	4.62341	3.75	2	11
b81	b81.a1	b81.a1.a1	Chassy_SC_916;N1P3E7;Q01217; Protein ARG5,6, mitochondrial - ARG5,6	-318.565	51	94.7	863	594		38		46	41	1.12195	12.2419	14.4878	1	21
d1758	d1758.a1	d1758.a1.a1	Chassy_SC_914;N1P320;P38887; Uncharacterized protein YHR202W - YHR202W	-5.8514	3	68.9	602	3		2		2	28	0.0714286	0.178769	0.107143	1	3
d2069	d2069.a1	d2069.a1.a1	Chassy_SC_912;N1NYX6;Q07800; Phosphatase PSR1 - PSR1	-3.50864	2	48.5	433	1		1		1	14	0.0714286	0.178769	0.0714286	1	1
d1994	d1994.a1	d1994.a1.a1	Chassy_SC_91;N1P3N4;Q12481; rRNA biogenesis protein RRP36 - RRP36	-2.72125	2	36	300	1		1		1	15	0.0666667	0.165914	0.0666667	1	1
c331	c331.a1	c331.a1.a1	Chassy_SC_906;N1P514;Q04947; Reticulon-like protein 1 - RTN1	-87.0486	52	32.8	295	222		14		17	17	1	9	13.0588	1	21
d1597	d1597.a1	d1597.a1.a1	Chassy_SC_905;N1NWN0;P35202; Thiamine pyrophosphokinase - THI80	-5.49485	4	36.5	319	6		1		1	17	0.0588235	0.145048	0.352941	1	6
c942	c942.a1	c942.a1.a1	Chassy_SC_9;N1P4N4;P38820; Adenylyltransferase and sulfurtransferase UBA4 - UBA4	-33.3292	16	49.2	440	37		7		7	18	0.388889	1.44844	2.05556	1	14
d1068	d1068.a1	d1068.a1.a1	Chassy_SC_896;N1NXF3;Q03798; Altered inheritance of mitochondria protein 36, mitochondrial - AIM36	-22.1079	20	28.9	255	25		4		4	13	0.307692	1.03092	1.92308	1	13
c214	c214.a1	c214.a1.a1	Chassy_SC_895;N1P7Q6;P15891; Actin-binding protein - ABP1	-153.896	45	65.4	592	327		21		22	28	0.785714	5.1054	11.6786	1	21
b12	b12.a1	b12.a1.a1	Chassy_SC_893;N1P7B9;P32324; Elongation factor 2 - EFT1	-574.314	75	93.1	842	1711		67		97	33	2.93939	868.749	51.8485	1	21
d1654	d1654.a1	d1654.a1.a1	Chassy_SC_892;N1NZD9;P32523; Pre-mRNA-processing factor 19 - PRP19	-6.39469	4	56.4	503	4		2		2	19	0.105263	0.274275	0.210526	1	3
d1432	d1432.a1	d1432.a1.a1	Chassy_SC_890;N1P9I7;P38884; Altered inheritance of mitochondria protein 18, mitochondrial - AIM18	-5.95861	3	36.4	321	9		1		1	8	0.125	0.333521	1.125	1	9
c681	c681.a1	c681.a1.a1	Chassy_SC_888;N1NYR9;P14906; Protein translocation protein SEC63 - SEC63	-57.6561	20	75.2	663	77		11		12	27	0.444444	1.78256	2.85185	1	21
c855	c855.a1	c855.a1.a1	Chassy_SC_887;N1NXX3;P50945; MICOS complex subunit MIC27 - MIC27	-38.0119	39	26.9	234	46		7		7	12	0.583333	2.83119	3.83333	1	12
c207	c207.a1	c207.a1.a1	Chassy_SC_886;N1P0U3;P54838; Dihydroxyacetone kinase 1 - DAK1	-195.644	56	62	584	332		26		31	25	1.24	16.378	13.28	1	21
d1248	d1248.a1	d1248.a1.a1	Chassy_SC_88;N1NZN7;Q06143; Mitochondrial dicarboxylate transporter - DIC1	-9.56384	9	32.9	298	15		3		3	12	0.25	0.778279	1.25	1	11
c583	c583.a1	c583.a1.a1	Chassy_SC_877;N1P9G0;P38741; Meiotic activator RIM4 - RIM4	-99.5481	28	80	713	102		14		15	24	0.625	3.21697	4.25	1	14
d1924	d1924.a1	d1924.a1.a1	Chassy_SC_875;N1P456;P40168; Uncharacterized protein YNL195C - YNL195C	-3.4318	3	28.2	261	1		1		1	10	0.1	0.258925	0.1	1	1
c104	c104.a1	c104.a1.a1	Chassy_SC_874;N1P279;P53252; Sphingolipid long chain base-responsive protein PIL1 - PIL1	-130.752	55	38.2	339	332	310	16	15	22	14	1.57143	36.2759	23.7143	1	21
d1693	d1693.a1	d1693.a1.a1	Chassy_SC_873;N1P127;P46673; Nucleoporin NUP85 - NUP85	-7.35912	4	84.7	744	4		2		2	31	0.0645161	0.160155	0.129032	1	3
d1640	d1640.a1	d1640.a1.a1	Chassy_SC_871;N1P419;P53272; Uncharacterized protein YGR122W - YGR122W	-8.34679	3	45.2	402	5		1		1	15	0.0666667	0.165914	0.333333	1	5
d1553	d1553.a1	d1553.a1.a1	Chassy_SC_87;N1P9W6;P40260; Ammonium transporter MEP1 - MEP1	-7.5376	2	54.1	492	6		1		1	5	0.2	0.584893	1.2	1	5
d1503	d1503.a1	d1503.a1.a1	Chassy_SC_869;N1NVG4;Q02457; Protein TBF1 - TBF1	-17.6576	5	62.7	562	8		2		2	19	0.105263	0.274275	0.421053	1	7
d1789	d1789.a1	d1789.a1.a1	Chassy_SC_867;N1P7H3;P48813; High-affinity glutamine permease - GNP1	-4.47756	2	73.4	663	2		2		2	18	0.111111	0.29155	0.111111	1	1
d1092	d1092.a1	d1092.a1.a1	Chassy_SC_861;N1P6H2;Q12176; Ribosome biogenesis protein MAK21 - MAK21	-27.8707	8	116.5	1025	24		7		7	43	0.162791	0.454758	0.55814	1	14
d1270	d1270.a1	d1270.a1.a1	Chassy_SC_86;N1P7Q3;P25372; Thioredoxin-3, mitochondrial - TRX3	-14.1634	21	14.3	127	14		3		3	8	0.375	1.37137	1.75	1	7
d1972	d1972.a1	d1972.a1.a1	Chassy_SC_856;N1P5E3;P39960; GTPase-activating protein BEM2/IPL2 - BEM2	-2.4437	0	245.1	2167	1		1		1	94	0.0106383	0.0247981	0.0106383	1	1
c934	c934.a1	c934.a1.a1	Chassy_SC_854;N1P1N3;P06102; General negative regulator of transcription subunit 3 - NOT3	-30.8379	8	94.2	836	38		5		5	37	0.135135	0.365008	1.02703	1	14
d1387	d1387.a1	d1387.a1.a1	Chassy_SC_851;N1P515;P39969; Protein BOI2 - BOI2	-13.0091	2	115.6	1040	10		3		3	41	0.0731707	0.183507	0.243902	1	8
d1764	d1764.a1	d1764.a1.a1	Chassy_SC_850;N1NYT7;Q06689; Cell membrane protein YLR413W - YLR413W	-7.69897	1	72.4	675	3		1		1	15	0.0666667	0.165914	0.2	1	3
c697	c697.a1	c697.a1.a1	Chassy_SC_85;N1NYU8;Q03532; ATP-dependent RNA helicase HAS1 - HAS1	-54.7332	27	56.6	505	73		12		12	28	0.428571	1.6827	2.60714	1	19
c904	c904.a1	c904.a1.a1	Chassy_SC_847;N1P8T1;P33317; Deoxyuridine 5'-triphosphate nucleotidohydrolase - DUT1	-22.1974	23	15.2	147	41		3		4	6	0.666667	3.64159	6.83333	1	17
c902	c902.a1	c902.a1.a1	Chassy_SC_841;N1NXQ0;P11938; DNA-binding protein RAP1 - RAP1	-25.27	10	90	806	41		6		6	28	0.214286	0.637894	1.46429	1	19
d1831	d1831.a1	d1831.a1.a1	Chassy_SC_836;N1P8T9;P38340; Alpha N-terminal protein methyltransferase 1 - TAE1	-2.22185	4	26	232	2		1		1	9	0.111111	0.29155	0.222222	1	2
d1755	d1755.a1	d1755.a1.a1	Chassy_SC_831;N1PAM6;Q07716; Altered inheritance of mitochondria protein 6 - AIM6	-8.27329	11	44.3	390	3		3		3	18	0.166667	0.467799	0.166667	1	3
c282	c282.a1	c282.a1.a1	Chassy_SC_83;N1P602;P32419; Malate dehydrogenase, peroxisomal - MDH3	-140.256	72	37.1	343	255		20		27	18	1.5	30.6228	14.1667	1	21
c464	c464.a1	c464.a1.a1	Chassy_SC_829;N1P6R7;P12385; Eukaryotic peptide chain release factor subunit 1 - SUP45	-93.7075	48	48.9	437	146		17		18	21	0.857143	6.19686	6.95238	1	21
c566	c566.a2	c566.a2.a1	Chassy_SC_828;N1P1A8;P47165; Xanthine phosphoribosyltransferase 1 - XPT1	-23.0566	31	23.6	209	19	18	4	3	4	10	0.4	1.51189	1.9	1	10
d1901	d1901.a1	d1901.a1.a1	Chassy_SC_825;N1P1A7;P33310; ATP-dependent permease MDL1, mitochondrial - MDL1	-2.25181	1	75.8	695	1		1		1	26	0.0384615	0.0926009	0.0384615	1	1
d1921	d1921.a1	d1921.a1.a1	Chassy_SC_824;N1NWB7;CENPK specific;No description in SC288c, annotation and gene name in CENPK: Cps1p -CENPK1137D_1960	-2.09152	4	29.1	264	1		1		1	10	0.1	0.258925	0.1	1	1
d1389	d1389.a1	d1389.a1.a1	Chassy_SC_817;N1P3X5;P40011; 4-hydroxy-4-methyl-2-oxoglutarate aldolase - YER010C	-4.4437	4	25.5	234	10		1		1	7	0.142857	0.389495	1.42857	1	9
c713	c713.a1	c713.a1.a1	Chassy_SC_816;N1P273;P38810; SED5-binding protein 3 - SFB3	-47.9776	16	103.8	929	69		10		10	27	0.37037	1.34623	2.55556	1	20
c589	c589.a1	c589.a1.a1	Chassy_SC_813;N1NVG1;P05744; 60S ribosomal protein L33-A - RPL33A	-33.1556	37	12.1	107	82	34	6	2	7	4	1.75	55.2341	20.5	1	21
c714	c714.a1	c714.a1.a1	Chassy_SC_812;N1NZ11;Q04697; Glucose-signaling factor 2 - GSF2	-40.3627	25	45.7	403	69		8		8	18	0.444444	1.78256	3.83333	1	20
c866	c866.a1	c866.a1.a1	Chassy_SC_81;N1P8J6;P20434; DNA-directed RNA polymerases I, II, and III subunit RPABC1 - RPB5	-24.9551	27	25	215	45		3		3	8	0.375	1.37137	5.625	1	18
c518	c518.a1	c518.a1.a1	Chassy_SC_809;N1P410;P50085; Prohibitin-2 - PHB2	-68.3949	29	34.3	310	124		9		10	11	0.909091	7.11131	11.2727	1	21
c776	c776.a1	c776.a1.a1	Chassy_SC_807;N1P6N3;P32495; H/ACA ribonucleoprotein complex subunit 2 - NHP2	-28.5345	47	17	156	57		6		8	5	1.6	38.8107	11.4	1	16
d1274	d1274.a1	d1274.a1.a1	Chassy_SC_806;N1P3U9;P39998; Enhancer of mRNA-decapping protein 3 - EDC3	-14.9194	4	61.2	551	14		2		2	17	0.117647	0.311134	0.823529	1	10
d1683	d1683.a1	d1683.a1.a1	Chassy_SC_805;N1P0Y4;P51998; 54S ribosomal protein YmL6, mitochondrial - YML6	-7.77057	12	31.9	286	4		2		2	16	0.125	0.333521	0.25	1	2
d1243	d1243.a1	d1243.a1.a1	Chassy_SC_803;N1P315;P38885; Altered inheritance of mitochondria protein 46, mitochondrial - AIM46	-10.6778	4	34	310	16		1		1	17	0.0588235	0.145048	0.941176	1	15
d1682	d1682.a1	d1682.a1.a1	Chassy_SC_799;N1NYG7;P53859; Exosome complex component CSL4 - CSL4	-2.88606	4	31.5	292	4		1		1	14	0.0714286	0.178769	0.285714	1	4
d1860	d1860.a1	d1860.a1.a1	Chassy_SC_792;N1P8G3;Q03778; Riboflavin kinase - FMN1	-5.01773	8	24.4	218	2		1		1	11	0.0909091	0.232847	0.181818	1	2
d1648	d1648.a1	d1648.a1.a1	Chassy_SC_790;N1P0Z3;P36151; Uncharacterized protein YKR070W - YKR070W	-5.98297	5	39.3	352	4		2		2	14	0.142857	0.389495	0.285714	1	4
d1399	d1399.a1	d1399.a1.a1	Chassy_SC_79;N1NZS9;Q05775; Eukaryotic translation initiation factor 3 subunit J - HCR1	-18.3887	19	29.5	265	10		4		4	9	0.444444	1.78256	1.11111	1	8
c646	c646.a1	c646.a1.a1	Chassy_SC_788;N1NZY4;P32366; V-type proton ATPase subunit d - VMA6	-55.0241	25	39.7	345	84		6		6	14	0.428571	1.6827	6	1	21
b42	b42.a1	b42.a1.a1	Chassy_SC_787;N1P3Q6;P05030; Plasma membrane ATPase 1 - PMA1	-318.381	37	99.4	918	847	257	32	11	52	22	2.36364	230.013	38.5	1	21
d1770	d1770.a1	d1770.a1.a1	Chassy_SC_784;N1P4G6;P53323; EKC/KEOPS complex subunit BUD32 - BUD32	-6.63827	7	29.8	261	3		1		1	7	0.142857	0.389495	0.428571	1	3
d1326	d1326.a1	d1326.a1.a1	Chassy_SC_783;N1P2A8;P36081; Uncharacterized protein YKL077W - YKL077W	-7.32883	5	45.9	392	12		2		2	14	0.142857	0.389495	0.857143	1	10
c307	c307.a1	c307.a1.a1	Chassy_SC_781;N1P858;Q03195; Translation initiation factor RLI1 - RLI1	-123.731	36	67.3	599	236		22		23	24	0.958333	8.08518	9.83333	1	21
d1488	d1488.a1	d1488.a1.a1	Chassy_SC_78;N1P4H0;P51601; GTP cyclohydrolase 1 - FOL2	-10.815	15	27.7	243	8		3		3	17	0.176471	0.501311	0.470588	1	6
d1573	d1573.a1	d1573.a1.a1	Chassy_SC_775;N1P6G0;Q12328; Mitochondrial import inner membrane translocase subunit TIM22 - TIM22	-6.81873	12	21.8	207	6		2		2	9	0.222222	0.668101	0.666667	1	5
d2019	d2019.a1	d2019.a1.a1	Chassy_SC_773;N1P627;P25365; Putative guanine nucleotide-exchange factor SED4 - SED4	-2.46852	1	115.7	1084	1		1		1	32	0.03125	0.0746078	0.03125	1	1
d1214	d1214.a1	d1214.a1.a1	Chassy_SC_771;N1P359;P08539; Guanine nucleotide-binding protein alpha-1 subunit - GPA1	-15.8576	9	53.9	472	17		4		4	27	0.148148	0.406527	0.62963	1	12
d1694	d1694.a1	d1694.a1.a1	Chassy_SC_770;N1P1F1;Q12498; Pheromone-regulated membrane protein 4 - PRM4	-3.52288	2	31.9	284	4		1		1	13	0.0769231	0.193777	0.307692	1	4
d1344	d1344.a1	d1344.a1.a1	Chassy_SC_768;N1NWS1;P25040; 20S rRNA accumulation protein 4 - TSR4	-8.85387	3	45.9	408	12		1		1	19	0.0526316	0.128838	0.631579	1	9
d1272	d1272.a1	d1272.a1.a1	Chassy_SC_763;N1NW64;Q12754; Ribosomal RNA-processing protein 12 - RRP12	-19.747	5	137.3	1228	14		5		5	43	0.116279	0.30701	0.325581	1	7
c940	c940.a1	c940.a1.a1	Chassy_SC_760;N1P5L7;P25340; Delta(24(24(1)))-sterol reductase - ERG4	-14.07	7	55.9	473	37		4		5	15	0.333333	1.15443	2.46667	1	18
b62	b62.a3	b62.a3.a1	Chassy_SC_76;N1NWR1;P53982; Isocitrate dehydrogenase [NADP] - IDP3	-83.2823	33	47.7	420	119	25	14	8	16	24	0.666667	3.64159	4.95833	1	21
c833	c833.a1	c833.a1.a1	Chassy_SC_752;N1PA84;CENPK specific;No description in SC288c, annotation and gene name in CENPK: Gpa2p -CENPK1137D_3678	-39.383	28	44.5	399	49		7		7	18	0.388889	1.44844	2.72222	1	16
c737	c737.a1	c737.a1.a1	Chassy_SC_75;N1P6Q7;P32469; Diphthine methyl ester synthase - DPH5	-40.9943	36	33.7	300	63		6		7	15	0.466667	1.92864	4.2	1	17
d1765	d1765.a1	d1765.a1.a1	Chassy_SC_749;N1NX43;Q02979; Glycerophosphocholine phosphodiesterase GDE1 - GDE1	-2.33724	1	137.8	1223	3		1		1	57	0.0175439	0.0412233	0.0526316	1	3
d1492	d1492.a1	d1492.a1.a1	Chassy_SC_748;N1P8Z3;P38196;|reversed Uridine permease - FUI1	-3.56864	2	72	639	8		1		2	22	0.0909091	0.232847	0.363636	1	6
d1198	d1198.a1	d1198.a1.a1	Chassy_SC_747;N1P3G7;P53130; Heterotrimeric G protein gamma subunit GPG1 - GPG1	-9.82391	13	14.8	126	18		1		2	2	1	9	9	1	12
d1598	d1598.a1	d1598.a1.a1	Chassy_SC_745;N1P4V3;CENPK specific;No description in SC288c, annotation and gene name in CENPK: Nog2p -CENPK1137D_2732	-7.65758	8	14.6	128	6		1		1	8	0.125	0.333521	0.75	1	6
d1739	d1739.a1	d1739.a1.a1	Chassy_SC_74;N1NZB5;P53909; Adenine deaminase - AAH1	-8.7081	9	39.5	347	3		3		3	16	0.1875	0.539927	0.1875	1	3
c375	c375.a2	c375.a2.a1	Chassy_SC_737;N1P5P7;P40989; 1,3-beta-glucan synthase component GSC2 - GSC2	-105.699	13	216.7	1895	147	17	22	6	23	63	0.365079	1.31782	2.33333	1	21
c706	c706.a1	c706.a1.a1	Chassy_SC_734;N1P103;P05749; 60S ribosomal protein L22-A - RPL22A	-31.3646	61	13.6	121	61	60	4	3	5	3	1.66667	45.4159	20.3333	1	16
c721	c721.a1	c721.a1.a1	Chassy_SC_733;N1NXV1;P49334; Mitochondrial import receptor subunit TOM22 - TOM22	-48.1604	33	16.7	152	67		5		6	5	1.2	14.8489	13.4	1	15
c611	c611.a1	c611.a1.a1	Chassy_SC_730;N1P0I2;P36015; Synaptobrevin homolog YKT6 - YKT6	-42.9217	43	22.6	200	91		8		9	15	0.6	2.98107	6.06667	1	19
d1748	d1748.a1	d1748.a1.a1	Chassy_SC_725;N1P2T9;P25038; Translation initiation factor IF-2, mitochondrial - IFM1	-7.57381	3	75.5	676	3		2		2	31	0.0645161	0.160155	0.0967742	1	2
d1026	d1026.a1	d1026.a1.a1	Chassy_SC_723;N1P8E5;P32501; Translation initiation factor eIF-2B subunit epsilon - GCD6	-25.5974	10	81	712	29		6		6	34	0.176471	0.501311	0.852941	1	15
d1108	d1108.a1	d1108.a1.a1	Chassy_SC_72;N1P4N3;P13586; Calcium-transporting ATPase 1 - PMR1	-25.0407	7	104.4	950	23		5		5	34	0.147059	0.403004	0.676471	1	12
c604	c604.a1	c604.a1.a1	Chassy_SC_718;N1PAC5;P05756; 40S ribosomal protein S13 - RPS13	-33.4658	50	16.9	151	94		7		7	9	0.777778	4.99484	10.4444	1	21
d1507	d1507.a1	d1507.a1.a1	Chassy_SC_714;N1P919;P30605; Myo-inositol transporter 1 - ITR1	-7.14267	1	63.4	584	7		1		2	8	0.25	0.778279	0.875	1	6
c344	c344.a1	c344.a1.a1	Chassy_SC_712;N1NWL4;P33297; 26S proteasome regulatory subunit 6A - RPT5	-127.963	52	48.1	434	211		16		17	22	0.772727	4.92553	9.59091	1	21
d1681	d1681.a1	d1681.a1.a1	Chassy_SC_710;N1P294;P40555; Probable 26S proteasome regulatory subunit p27 - NAS2	-3.49485	5	24.8	220	4		1		1	10	0.1	0.258925	0.4	1	4
d2042	d2042.a1	d2042.a1.a1	Chassy_SC_71;N1NXZ6;Q08951; AP-3 complex subunit delta - APL5	-4.4318	0	106.7	932	1		1		1	46	0.0217391	0.0513302	0.0217391	1	1
b20	b20.a1	b20.a1.a1	Chassy_SC_709;N1NYG5;P16521; Elongation factor 3A - YEF3	-531.688	70	115.7	1044	1267	985	65	51	93	39	2.38462	241.446	32.4872	1	21
c852	c852.a1	c852.a1.a1	Chassy_SC_708;N1P0Z0;P00431; Cytochrome c peroxidase, mitochondrial - CCP1	-30.6667	19	41.9	374	46		6		6	17	0.352941	1.25393	2.70588	1	15
c154	c154.a1	c154.a1.a1	Chassy_SC_707;N1NW16;P08417; Fumarate hydratase, mitochondrial - FUM1	-175.558	51	53	488	396		21		29	16	1.8125	63.9382	24.75	1	21
b97	b97.a2	b97.a2.a1	Chassy_SC_703;N1P215;P40510; D-3-phosphoglycerate dehydrogenase 2 - SER33	-144.912	52	51.1	469	370	145	19	9	25	18	1.38889	23.4844	20.5556	1	21
d2024	d2024.a1	d2024.a1.a1	Chassy_SC_701;N1P056;CENPK|reversed specific;No description in SC288c, annotation and gene name in CENPK: Cdc25p -CENPK1137D_761	-2.04576	1	114.8	994	1		1		1	41	0.0243902	0.0577676	0.0243902	1	1
d1499	d1499.a1	d1499.a1.a1	Chassy_SC_700;N1PAM1;P39932; Sugar transporter STL1 - STL1	-16.2976	8	63.4	569	8		3		4	16	0.25	0.778279	0.5	1	3
d1936	d1936.a1	d1936.a1.a1	Chassy_SC_7;N1P6B5;P25332; Ribokinase - RBK1	-2.20761	2	36.9	333	1		1		1	14	0.0714286	0.178769	0.0714286	1	1
d1554	d1554.a1	d1554.a1.a1	Chassy_SC_698;N1P5G4;P53157; Mitochondrial pyruvate carrier 1 - MPC1	-5.6073	14	14.9	130	6		2		2	5	0.4	1.51189	1.2	1	5
d1914	d1914.a1	d1914.a1.a1	Chassy_SC_697;N1NW43;P46683; Ankyrin repeat-containing protein YAR1 - YAR1	-2.55284	8	22.3	200	1		1		1	12	0.0833333	0.211528	0.0833333	1	1
d1644	d1644.a1	d1644.a1.a1	Chassy_SC_694;N1NZG4;P38915; Transcription factor SPT8 - SPT8	-10.5376	3	65.5	598	4		1		1	24	0.0416667	0.100694	0.166667	1	4
d1742	d1742.a1	d1742.a1.a1	Chassy_SC_690;N1P9K2;P38129; Transcription initiation factor TFIID subunit 5 - TAF5	-6.32331	3	88.8	798	3		2		2	34	0.0588235	0.145048	0.0882353	1	3
c969	c969.a1	c969.a1.a1	Chassy_SC_684;N1NYD0;Q12000; Translation machinery-associated protein 46 - TMA46	-24.6406	12	39.4	345	35		4		4	14	0.285714	0.930698	2.5	1	15
c983	c983.a1	c983.a1.a1	Chassy_SC_683;N1NVW6;Q02875; SMY2 homolog 2 - SYH1	-48.138	15	94.2	849	33		9		9	28	0.321429	1.09618	1.17857	1	12
c836	c836.a1	c836.a1.a1	Chassy_SC_680;N1P458;P53292; 37S ribosomal protein S35, mitochondrial - MRPS35	-44.8205	33	39.5	345	48		10		10	17	0.588235	2.87468	2.82353	1	15
b42	b42.a2	b42.a2.a1	Chassy_SC_679;N1NVZ2;P19657; Plasma membrane ATPase 2 - PMA2	-254.81	34	102	947	632	42	27	6	43	24	1.79167	60.8966	26.3333	1	21
d1743	d1743.a1	d1743.a1.a1	Chassy_SC_677;N1P170;P22936; DNA-(apurinic or apyrimidinic site) lyase 1 - APN1	-5.71063	5	41.3	367	3		2		2	14	0.142857	0.389495	0.214286	1	3
d1529	d1529.a1	d1529.a1.a1	Chassy_SC_675;N1PAJ2;P52488; Ubiquitin-activating enzyme E1-like - UBA2	-8.55533	6	71.1	636	7		2		2	23	0.0869565	0.221677	0.304348	1	5
d1498	d1498.a1	d1498.a1.a1	Chassy_SC_674;N1P9R1;P38203; U6 snRNA-associated Sm-like protein LSm2 - LSM2	-6.08619	13	11.1	95	8		1		1	6	0.166667	0.467799	1.33333	1	8
c864	c864.a1	c864.a1.a1	Chassy_SC_670;N1P5R2;P11491; Repressible alkaline phosphatase - PHO8	-48.3551	21	62.9	566	45		6		6	19	0.315789	1.06914	2.36842	1	18
c356	c356.a1	c356.a1.a2	Chassy_SC_668;N1P034;Q3E7Y3; 40S ribosomal protein S22-B - RPS22B	-86.7931	67	14.5	130	203		9		13	6	2.16667	145.78	33.8333	2	21
d1020	d1020.a1	d1020.a1.a1	Chassy_SC_666;N1NW27;P00812; Arginase - CAR1	-25.2928	18	35.6	333	29		7		7	11	0.636364	3.32876	2.63636	1	10
c323	c323.a1	c323.a1.a1	Chassy_SC_665;N1P4H2;P07283; Phosphomannomutase - SEC53	-86.6858	57	29	254	226		13		17	14	1.21429	15.3789	16.1429	1	21
c928	c928.a1	c928.a1.a1	Chassy_SC_663;N1PA15;P43555; Protein EMP47 - EMP47	-26.4841	13	50.2	445	38		5		6	15	0.4	1.51189	2.53333	1	14
c449	c449.a1	c449.a1.a1	Chassy_SC_660;N1NWR3;P40303; Proteasome subunit alpha type-4 - PRE6	-90.9362	67	28.3	254	153		12		13	13	1	9	11.7692	1	21
d1550	d1550.a1	d1550.a1.a1	Chassy_SC_66;N1P4G9;Q07648; D-aminoacyl-tRNA deacylase - DTD1	-5.09691	7	16.7	150	6		1		1	6	0.166667	0.467799	1	1	6
d1190	d1190.a1	d1190.a1.a1	Chassy_SC_659;N1P5J6;Q99385; Vacuolar calcium ion transporter - VCX1	-21.429	10	44.5	411	18		3		3	5	0.6	2.98107	3.6	1	10
d2025	d2025.a1	d2025.a1.a1	Chassy_SC_658;N1P4F2;P40487; 2-(3-amino-3-carboxypropyl)histidine synthase subunit 1 - DPH1	-5.29243	3	48.2	425	1		1		1	22	0.0454545	0.110336	0.0454545	1	1
c402	c402.a1	c402.a1.a1	Chassy_SC_655;N1NXJ2;P21242; Probable proteasome subunit alpha type-7 - PRE10	-89.9088	51	31.4	288	173		13		16	13	1.23077	16.0125	13.3077	1	21
c577	c577.a1	c577.a1.a1	Chassy_SC_653;N1P492;P33399; La protein homolog - LHP1	-68.1368	44	32	275	104		13		14	11	1.27273	17.7382	9.45455	1	15
c431	c431.a1	c431.a1.a1	Chassy_SC_651;N1P4E4;P40327; 26S proteasome regulatory subunit 4 homolog - RPT2	-89.5636	37	48.7	437	162		13		13	21	0.619048	3.15956	7.71429	1	21
c607	c607.a1	c607.a1.a1	Chassy_SC_650;N1P6E7;P25039; Elongation factor G, mitochondrial - MEF1	-47.5827	16	84.5	761	92		9		9	29	0.310345	1.04336	3.17241	1	21
d1838	d1838.a1	d1838.a1.a1	Chassy_SC_649;N1NZ50;Q12387; N-terminal acetyltransferase B complex subunit MDM20 - MDM20	-5.10624	2	92.6	796	2		2		2	38	0.0526316	0.128838	0.0526316	1	2
c944	c944.a1	c944.a1.a1	Chassy_SC_648;N1NX06;P23202; Transcriptional regulator URE2 - URE2	-33.7159	20	40.2	354	37		6		6	10	0.6	2.98107	3.7	1	15
b41	b41.a2	b41.a2.a1	Chassy_SC_646;N1PAL7;Q04409; Putative glucokinase-2 - EMI2	-151.024	44	55.8	500	326	235	25	22	27	26	1.03846	9.92601	12.5385	1	21
b97	b97.a1	b97.a1.a1	Chassy_SC_644;N1P4Y2;P40054; D-3-phosphoglycerate dehydrogenase 1 - SER3	-148.523	48	51.1	469	397	172	19	9	26	19	1.36842	22.3572	20.8947	1	21
c643	c643.a1	c643.a1.a1	Chassy_SC_643;N1P9W9;P23638; Proteasome subunit alpha type-3 - PRE9	-48.1755	31	28.6	258	84		8		9	14	0.642857	3.39397	6	1	19
c486	c486.a1	c486.a1.a2	Chassy_SC_642;N1P503;P02293; Histone H2B.1 - HTB1	-50.3015	34	14.2	131	136		6		9	5	1.8	62.0957	27.2	2	21
d1080	d1080.a1	d1080.a1.a1	Chassy_SC_641;N1P3N2;P53261; Pescadillo homolog - NOP7	-19.3239	12	69.7	605	24		5		5	26	0.192308	0.557068	0.923077	1	14
c618	c618.a1	c618.a1.a1	Chassy_SC_640;N1NY03;Q06892; NADH kinase POS5, mitochondrial - POS5	-68.1647	39	46.2	414	90		12		12	14	0.857143	6.19686	6.42857	1	21
a1	a1.a1	a1.a1.a1	Chassy_SC_64;N1P2H7;P00359; Glyceraldehyde-3-phosphate dehydrogenase 3 - TDH3	-484.409	89	35.6	332	2623	1053	65	18	89	14	6.35714	2.27584e+06	187.357	1	21
c396	c396.a1	c396.a1.a1	Chassy_SC_639;N1PA80;P29952; Mannose-6-phosphate isomerase - PMI40	-93.8867	50	48.1	429	177		15		17	23	0.73913	4.48442	7.69565	1	21
b35	b35.a1	b35.a1.a1	Chassy_SC_637;N1P9R2;P07251; ATP synthase subunit alpha, mitochondrial - ATP1	-347.875	60	58.5	545	1044		37		54	23	2.34783	221.754	45.3913	1	21
c404	c404.a1	c404.a1.a1	Chassy_SC_636;N1NYY8;Q04636; FACT complex subunit POB3 - POB3	-94.4118	31	62.9	552	172		15		17	28	0.607143	3.04709	6.14286	1	21
b10	b10.a1	b10.a1.a1	Chassy_SC_635;N1P4S9;P04806; Hexokinase-1 - HXK1	-528.021	86	53.6	485	1398	1356	59	56	95	21	4.52381	33403.8	66.5714	1	21
c659	c659.a1	c659.a1.a1	Chassy_SC_634;N1NWL7;P07274; Profilin - PFY1	-58.7593	85	13.6	126	81		7		7	4	1.75	55.2341	20.25	1	21
c521	c521.a1	c521.a1.a1	Chassy_SC_633;N1NYF2;P53852; Cysteine--tRNA ligase - YNL247W	-72.151	24	85.7	754	124		15		16	38	0.421053	1.63665	3.26316	1	21
d1283	d1283.a1	d1283.a1.a1	Chassy_SC_631;N1NXR7;P53875; 54S ribosomal protein L19, mitochondrial - MRPL19	-13.3242	25	16.6	158	14		2		2	8	0.25	0.778279	1.75	1	10
b34	b34.a1	b34.a1.a1	Chassy_SC_630;N1P7G8;P19358; S-adenosylmethionine synthase 2 - SAM2	-268.717	78	42.1	384	787	466	31	17	43	15	2.86667	734.642	52.4667	1	21
d1082	d1082.a1	d1082.a1.a1	Chassy_SC_629;N1P0B8;P32892; ATP-dependent RNA helicase DRS1 - DRS1	-24.2491	9	84.3	748	24		6		6	29	0.206897	0.610262	0.827586	1	14
c456	c456.a1	c456.a1.a1	Chassy_SC_628;N1P9K8;P00447; Superoxide dismutase [Mn], mitochondrial - SOD2	-64.4035	56	25.7	233	150		8		9	7	1.28571	18.307	21.4286	1	21
b69	b69.a1	b69.a1.a1	Chassy_SC_627;N1P0K4;P22515; Ubiquitin-activating enzyme E1 1 - UBA1	-311.545	58	114.1	1024	660		51		67	44	1.52273	32.3217	15	1	21
c655	c655.a1	c655.a1.a1	Chassy_SC_626;N1P1I6;CENPK specific;No description in SC288c, annotation and gene name in CENPK: 40S ribosomal protein S27 -CENPK1137D_5414	-24.9897	28	12.4	112	81		4		6	3	2	99	27	1	19
c433	c433.a1	c433.a1.a1	Chassy_SC_625;N1P1Y9;Q12031; Mitochondrial 2-methylisocitrate lyase - ICL2	-88.6082	28	64.8	575	160		18		20	30	0.666667	3.64159	5.33333	1	18
d1528	d1528.a1	d1528.a1.a1	Chassy_SC_624;N1P7X9;P36040; Proteasome assembly chaperone 2 - ADD66	-5.12494	6	30.6	267	7		2		2	7	0.285714	0.930698	1	1	6
c293	c293.a1	c293.a1.a1	Chassy_SC_623;N1PAF1;P39079; T-complex protein 1 subunit zeta - CCT6	-137.612	46	59.8	546	245		19		21	21	1	9	11.6667	1	21
d1496	d1496.a1	d1496.a1.a1	Chassy_SC_622;N1P373;Q12386; Actin-like protein ARP8 - ARP8	-11.6866	2	100.2	881	8		2		2	37	0.0540541	0.132541	0.216216	1	7
b18	b18.a1	b18.a1.a1	Chassy_SC_620;N1P8V5;P00549; Pyruvate kinase 1 - CDC19	-399.709	85	54.4	500	1422	1365	51	47	72	26	2.76923	586.802	54.6923	1	21
c343	c343.a1	c343.a1.a1	Chassy_SC_62;N1P1Z7;P27796; 3-ketoacyl-CoA thiolase, peroxisomal - POT1	-137.354	44	44.6	417	211		14		16	16	1	9	13.1875	1	19
d1859	d1859.a1	d1859.a1.a1	Chassy_SC_619;N1P047;P11325; Leucine--tRNA ligase, mitochondrial - NAM2	-4.82974	3	101.7	894	2		2		2	41	0.0487805	0.118872	0.0487805	1	1
d1285	d1285.a1	d1285.a1.a1	Chassy_SC_615;N1NZM1;Q06168; Chromatin structure-remodeling complex subunit SFH1 - SFH1	-12.7926	9	48.7	426	14		2		2	9	0.222222	0.668101	1.55556	1	10
c629	c629.a2	c629.a2.a1	Chassy_SC_614;N1P9L7;Q00772; Mitogen-activated protein kinase SLT2/MPK1 - SLT2	-20.3753	14	55.5	484	25	22	6	5	6	18	0.333333	1.15443	1.38889	1	14
c290	c290.a2	c290.a2.a1	Chassy_SC_612;N1P1M8;P05738; 60S ribosomal protein L9-A - RPL9A	-76.1146	63	21.5	191	215	31	11	1	15	7	2.14286	137.95	30.7143	1	21
c127	c127.a2	c127.a2.a1	Chassy_SC_610;N1P2F7;P49089; Asparagine synthetase [glutamine-hydrolyzing] 1 - ASN1	-151.452	39	64.3	572	290	148	23	15	24	25	0.96	8.12011	11.6	1	21
c529	c529.a1	c529.a1.a1	Chassy_SC_609;N1P4N6;P43588; Ubiquitin carboxyl-terminal hydrolase RPN11 - RPN11	-62.8469	36	34.3	306	120		9		10	13	0.769231	4.87802	9.23077	1	20
c248	c248.a1	c248.a1.a1	Chassy_SC_606;N1NWV8;P53549; 26S proteasome subunit RPT4 - RPT4	-79.849	30	49.3	437	154	119	13	12	13	18	0.722222	4.275	8.55556	1	21
c168	c168.a2	c168.a2.a1	Chassy_SC_603;N1P4L2;P38714; Arginine--tRNA ligase, mitochondrial - MSR1	-13.7167	4	70.5	617	22	1	3	1	3	37	0.0810811	0.205261	0.594595	1	18
d1186	d1186.a1	d1186.a1.a1	Chassy_SC_601;N1P0A8;Q03148; Pyridoxal 5'-phosphate synthase subunit SNZ1 - SNZ1	-18.1915	13	31.7	297	15	3	4	2	5	9	0.555556	2.59381	1.66667	1	6
c762	c762.a1	c762.a1.a1	Chassy_SC_60;N1P886;P38221; Phosphatidate cytidylyltransferase - CDS1	-20.9882	10	51.7	457	58		5		5	16	0.3125	1.05353	3.625	1	21
c743	c743.a1	c743.a1.a1	Chassy_SC_6;N1NYF6;Q05979; Kynureninase - BNA5	-43.2407	14	50.9	453	62		5		5	16	0.3125	1.05353	3.875	1	16
c140	c140.a1	c140.a1.a1	Chassy_SC_598;N1P4H3;P32565; 26S proteasome regulatory subunit RPN2 - RPN2	-217.029	36	104	945	425		33		37	46	0.804348	5.37306	9.23913	1	21
a1	a1.a3	a1.a3.a1	Chassy_SC_595;N1NZW1;P00360; Glyceraldehyde-3-phosphate dehydrogenase 1 - TDH1	-297.445	85	35.6	332	1061	309	42	18	54	17	3.17647	1500.31	62.4118	1	21
c700	c700.a1	c700.a1.a1	Chassy_SC_592;N1P9Q3;P23724; Proteasome subunit beta type-6 - PRE7	-46.0251	42	26.8	241	72		10		11	13	0.846154	6.01704	5.53846	1	19
c542	c542.a1	c542.a1.a1	Chassy_SC_591;N1P1N7;Q06142; Importin subunit beta-1 - KAP95	-76.4569	22	94.6	861	115		13		14	23	0.608696	3.06159	5	1	20
c605	c605.a1	c605.a1.a1	Chassy_SC_589;N1P2T3;Q08179; Mitochondrial distribution and morphology protein 38 - MDM38	-73.3438	31	64.8	573	93		14		15	29	0.517241	2.29034	3.2069	1	20
d2041	d2041.a1	d2041.a1.a1	Chassy_SC_584;N1NWU9;P32480; Protein HIR2 - HIR2	-2.4437	1	98.3	875	1		1		1	37	0.027027	0.0642092	0.027027	1	1
d1944	d1944.a1	d1944.a1.a1	Chassy_SC_583;N1NW91;P41835; Thiamine biosynthetic bifunctional enzyme - THI6	-2.24413	2	57.9	540	1		1		1	20	0.05	0.122018	0.05	1	1
c434	c434.a1	c434.a1.a1	Chassy_SC_582;N1NZE6;Q02196; Adenylyl-sulfate kinase - MET14	-85.6475	66	23	202	160		11		11	8	1.375	22.7137	20	1	21
c401	c401.a1	c401.a1.a1	Chassy_SC_581;N1NZ36;P14904; Vacuolar aminopeptidase 1 - APE1	-93.4797	33	57	514	173		13		14	22	0.636364	3.32876	7.86364	1	21
b76	b76.a1	b76.a1.a1	Chassy_SC_580;N1NWR9;P06634; ATP-dependent RNA helicase DED1 - DED1	-218.387	61	68.5	631	433	381	27	22	30	29	1.03448	9.82637	14.931	1	21
c688	c688.a1	c688.a1.a1	Chassy_SC_579;N1P738;P02400; 60S acidic ribosomal protein P2-beta - RPP2B	-34.0143	54	11	110	75		5		6	5	1.2	14.8489	15	1	21
c749	c749.a1	c749.a1.a1	Chassy_SC_578;N1P1U2;P40581; Glutathione peroxidase-like peroxiredoxin HYR1 - HYR1	-42.5912	42	18.6	163	61		8		8	6	1.33333	20.5443	10.1667	1	16
d1127	d1127.a1	d1127.a1.a1	Chassy_SC_576;N1P7S8;P20604; Serine/threonine-protein phosphatase PP1-1 - SIT4	-25.9691	20	35.4	311	22		4		4	18	0.222222	0.668101	1.22222	1	12
c676	c676.a1	c676.a1.a1	Chassy_SC_574;N1P3G5;P04456; 60S ribosomal protein L25 - RPL25	-46.5017	57	15.7	142	77		9		11	5	2.2	157.489	15.4	1	21
c678	c678.a1	c678.a1.a1	Chassy_SC_570;N1P9A6;Q00245; GTP-binding protein RHO3 - RHO3	-43.3426	26	25.2	231	77		6		6	11	0.545455	2.51119	7	1	19
c544	c544.a1	c544.a1.a1	Chassy_SC_57;N1P622;P48015; Aminomethyltransferase, mitochondrial - GCV1	-82.2992	36	44.4	400	114		10		11	15	0.733333	4.4117	7.6	1	21
c304	c304.a1	c304.a1.a1	Chassy_SC_564;N1NX38;P02992; Elongation factor Tu, mitochondrial - TUF1	-126.616	41	47.8	437	237		19		24	19	1.26316	17.3298	12.4737	1	21
c452	c452.a2	c452.a2.a1	Chassy_SC_563;N1NVU4;P32836; GTP-binding nuclear protein GSP2/CNR2 - GSP2	-51.049	33	24.9	220	128	13	7	1	7	11	0.636364	3.32876	11.6364	1	21
c374	c374.a1	c374.a1.a1	Chassy_SC_562;N1P8K2;P24276; Protein SSD1 - SSD1	-168.446	29	139.7	1250	190		29		31	54	0.574074	2.75037	3.51852	1	18
c289	c289.a1	c289.a1.a1	Chassy_SC_561;N1P375;P04076; Argininosuccinate lyase - ARG4	-146.968	44	51.9	463	248		22		25	21	1.19048	14.5052	11.8095	1	21
d1046	d1046.a1	d1046.a1.a1	Chassy_SC_559;N1P2J2;P40509; Coatomer subunit epsilon - SEC28	-23.4683	17	33.7	296	27		3		3	12	0.25	0.778279	2.25	1	12
b13	b13.a1	b13.a1.a1	Chassy_SC_557;N1P0G2;P06169; Pyruvate decarboxylase isozyme 1 - PDC1	-354.68	71	61.4	563	1627	1305	43	36	79	24	3.29167	1956.34	67.7917	1	21
c221	c221.a1	c221.a1.a1	Chassy_SC_551;N1NYM9;P05317; 60S acidic ribosomal protein P0 - RPP0	-95.9768	43	33.6	312	321		12		16	9	1.77778	58.9484	35.6667	1	21
b39	b39.a1	b39.a1.a1	Chassy_SC_547;N1P1B1;P38720; 6-phosphogluconate dehydrogenase, decarboxylating 1 - GND1	-331.356	82	53.4	489	746	536	39	29	51	24	2.125	132.352	31.0833	1	21
d1495	d1495.a1	d1495.a1.a1	Chassy_SC_546;N1P8X3;P39704; Protein ERP2 - ERP2	-15.4535	19	24	215	8		2		2	4	0.5	2.16228	2	1	4
c746	c746.a1	c746.a1.a1	Chassy_SC_5435;N1P9F6;P18562; Uracil phosphoribosyltransferase - FUR1	-35.9664	41	24.5	216	61		8		9	13	0.692308	3.92388	4.69231	1	19
d1527	d1527.a1	d1527.a1.a1	Chassy_SC_5432;N1P0D6;P38615; Serine/threonine-protein kinase RIM11/MSD1 - RIM11	-8.30452	5	42.8	370	7		2		2	14	0.142857	0.389495	0.5	1	5
d1313	d1313.a1	d1313.a1.a1	Chassy_SC_5427;N1NY46;Q08162; Exosome complex exonuclease DIS3 - DIS3	-14.5899	3	113.5	1001	13		3		3	47	0.0638298	0.158323	0.276596	1	10
c672	c672.a1	c672.a1.a1	Chassy_SC_5426;N1P4L6;P53101; Cystathionine beta-lyase - STR3	-52.127	25	51.7	465	78		8		9	18	0.5	2.16228	4.33333	1	18
d1954	d1954.a1	d1954.a1.a1	Chassy_SC_5425;N1P420;P47025; Mitochondrial division protein 1 - MDV1	-2.85387	1	79.9	714	1		1		1	27	0.037037	0.089023	0.037037	1	1
c188	c188.a2	c188.a2.a1	Chassy_SC_5423;N1P7J0;Q04120; Peroxiredoxin TSA2 - TSA2	-23.944	36	21.5	196	19	14	7	5	7	6	1.16667	13.678	3.16667	1	7
d1314	d1314.a1	d1314.a1.a1	Chassy_SC_5421;N1P9L9;P38768; Protein interacting with Hsp90 1 - PIH1	-8.55284	2	39.4	344	13		1		1	14	0.0714286	0.178769	0.928571	1	13
d1066	d1066.a1	d1066.a1.a1	Chassy_SC_5419;N1P680;Q12746; Plasma membrane-associated coenzyme Q6 reductase PGA3 - PGA3	-24.3298	14	35.2	312	25		3		3	14	0.214286	0.637894	1.78571	1	14
c501	c501.a1	c501.a1.a1	Chassy_SC_5417;N1P2S7;Q02046; Methylenetetrahydrofolate dehydrogenase [NAD(+)] - MTD1	-78.8516	52	36.1	320	132		12		12	15	0.8	5.30957	8.8	1	18
c275	c275.a2	c275.a2.a1	Chassy_SC_5416;N1P7V9;P06367; 40S ribosomal protein S14-A - RPS14A	-102.089	68	14.5	137	254	6	12	1	17	7	2.42857	267.27	36.2857	1	21
c838	c838.a1	c838.a1.a1	Chassy_SC_5412;N1P3J3;P47127; Altered inheritance of mitochondria protein 24, mitochondrial - AIM24	-33.0989	21	44.4	394	48		6		6	24	0.25	0.778279	2	1	17
d1647	d1647.a1	d1647.a1.a1	Chassy_SC_5411;N1NW13;Q12284; FAD-linked sulfhydryl oxidase ERV2 - ERV2	-4.14874	6	22	196	4		1		1	7	0.142857	0.389495	0.571429	1	4
d2078	d2078.a1	d2078.a1.a1	Chassy_SC_5409;N1P0X2;P47054; Nucleoporin NUP192 - NUP192	-2.16749	0	191.2	1683	1		1		1	72	0.0138889	0.0324972	0.0138889	1	1
d1497	d1497.a1	d1497.a1.a1	Chassy_SC_5405;N1NW57;Q06511; Ribosomal RNA-processing protein 15 - RRP15	-7.25181	8	28.1	250	8		1		1	6	0.166667	0.467799	1.33333	1	6
c933	c933.a1	c933.a1.a1	Chassy_SC_5403;N1P289;P38716; Uncharacterized trans-sulfuration enzyme YHR112C - YHR112C	-23.9721	22	42.3	378	38		6		7	16	0.4375	1.73842	2.375	1	16
d2071	d2071.a1	d2071.a1.a1	Chassy_SC_5402;N1NXI0;P39013; Actin cytoskeleton-regulatory complex protein END3 - END3	-3.13077	5	40.2	349	1		1		1	18	0.0555556	0.136464	0.0555556	1	1
d1791	d1791.a1	d1791.a1.a1	Chassy_SC_5400;N1PAL5;P50896; Protein PSP1 - PSP1	-4.85078	3	95.2	841	2		2		2	30	0.0666667	0.165914	0.0666667	1	2
c911	c911.a1	c911.a1.a1	Chassy_SC_540;N1P6C3;Q2V2P9; Uncharacterized protein YDR119W-A - YDR119W-A	-16.3152	17	7.4	66	40		2		2	2	1	9	20	1	21
d1570	d1570.a1	d1570.a1.a1	Chassy_SC_54;N1PAW6;P38352; SCF-associated factor 1 - SAF1	-8.94462	3	70.3	637	6		2		2	27	0.0740741	0.185971	0.222222	1	5
c441	c441.a1	c441.a1.a1	Chassy_SC_5398;N1P3Z0;P40017; Carnitine O-acetyltransferase YAT2 - YAT2	-112.037	21	103.2	923	155		17		18	37	0.486486	2.0654	4.18919	1	21
d1074	d1074.a1	d1074.a1.a1	Chassy_SC_5389;N1NVW0;P20436; DNA-directed RNA polymerases I, II, and III subunit RPABC3 - RPB8	-25.4023	26	16.4	146	25		3		3	5	0.6	2.98107	5	1	14
d1612	d1612.a1	d1612.a1.a1	Chassy_SC_5386;N1P092;P47150; 37S ribosomal protein S7, mitochondrial - RSM7	-6.22621	9	26.7	239	5		2		2	16	0.125	0.333521	0.3125	1	5
d1622	d1622.a1	d1622.a1.a1	Chassy_SC_5385;N1NXB5;P32452; Putative prephenate dehydratase - PHA2	-6.39448	5	38.1	334	5		2		2	13	0.153846	0.425103	0.384615	1	5
d1652	d1652.a1	d1652.a1.a1	Chassy_SC_5380;N1NW51;Q06497; Peroxisomal adenine nucleotide transporter 1 - ANT1	-6.69897	5	36.3	328	4		1		1	12	0.0833333	0.211528	0.333333	1	4
c572	c572.a1	c572.a1.a1	Chassy_SC_5379;N1P6F4;P38061; 60S ribosomal protein L32 - RPL32	-35.3283	41	14.7	130	106		6		8	5	1.6	38.8107	21.2	1	21
d1315	d1315.a1	d1315.a1.a1	Chassy_SC_5376;N1PA48;P39965; Probable proline--tRNA ligase, mitochondrial - AIM10	-10.7716	6	65.7	576	13		3		3	33	0.0909091	0.232847	0.393939	1	9
d1939	d1939.a1	d1939.a1.a1	Chassy_SC_5375;N1P5B5;P39985; DNA polymerase V - POL5	-3.65758	1	115.7	1022	1		1		1	50	0.02	0.0471285	0.02	1	1
c742	c742.a1	c742.a1.a1	Chassy_SC_5374;N1P7S7;CENPK specific;No description in SC288c, annotation and gene name in CENPK: Leu2p -CENPK1137D_4481	-34.9586	60	5.5	54	62		3		3	2	1.5	30.6228	31	1	21
c769	c769.a1	c769.a1.a1	Chassy_SC_5370;N1P2P8;P36136; Sedoheptulose 1,7-bisphosphatase - SHB17	-45.2038	25	30.9	271	58		5		5	13	0.384615	1.42446	4.46154	1	16
d1727	d1727.a1	d1727.a1.a1	Chassy_SC_5365;N1P6Q8;P32908; Structural maintenance of chromosomes protein 1 - SMC1	-2.95861	0	141.1	1225	3		1		1	52	0.0192308	0.0452755	0.0576923	1	3
d1034	d1034.a1	d1034.a1.a1	Chassy_SC_5360;N1P1Q8;Q02785; ATP-dependent permease PDR12 - PDR12	-59.8659	9	170.8	1511	28		13		13	48	0.270833	0.865664	0.583333	1	4
d2081	d2081.a1	d2081.a1.a1	Chassy_SC_5357;N1P850;P38961; 25S rRNA (adenine(645)-N(1))-methyltransferase - RRP8	-5.22915	4	45.9	392	1		1		1	16	0.0625	0.154782	0.0625	1	1
c356	c356.a1	c356.a1.a1	Chassy_SC_5355;N1P8U5;P0C0W1; 40S ribosomal protein S22-A - RPS22A	-86.7931	67	14.5	130	203		9		13	6	2.16667	145.78	33.8333	2	21
c950	c950.a1	c950.a1.a1	Chassy_SC_5353;N1P0T8;Q03629; Uncharacterized protein YML079W - YML079W	-29.9966	32	22.4	201	37		4		5	8	0.625	3.21697	4.625	1	12
c895	c895.a1	c895.a1.a1	Chassy_SC_5351;N1P8C0;P35719; Uncharacterized protein MRP8 - MRP8	-41.8024	46	25	219	42		7		7	10	0.7	4.01187	4.2	1	10
c677	c677.a1	c677.a1.a1	Chassy_SC_5350;N1P6F2;Q12117; Protein MRH1 - MRH1	-29.8368	14	36.1	320	60	30	4	3	6	5	1.2	14.8489	12	1	19
c757	c757.a1	c757.a1.a1	Chassy_SC_535;N1P9M6;P38145; Riboflavin synthase - RIB5	-43.8698	35	26.1	238	59		7		10	11	0.909091	7.11131	5.36364	1	15
d1505	d1505.a1	d1505.a1.a1	Chassy_SC_5348;N1NZN6;P36053; Transcription elongation factor 1 - ELF1	-5.56864	6	16.1	145	7		1		1	6	0.166667	0.467799	1.16667	1	7
d1787	d1787.a1	d1787.a1.a1	Chassy_SC_5347;N1NYI4;Q05874; Protein N-terminal and lysine N-methyltransferase EFM7 - NNT1	-3.49485	4	29.5	261	2		1		1	7	0.142857	0.389495	0.285714	1	2
d1867	d1867.a1	d1867.a1.a1	Chassy_SC_5345;N1NXS0;P23797; N-acetylglucosaminyl-phosphatidylinositol de-N-acetylase - GPI12	-3.45593	3	35.3	304	2		1		1	12	0.0833333	0.211528	0.166667	1	2
c310	c310.a2	c310.a2.a1	Chassy_SC_5344;N1P3L8;P38627; CTP synthase 2 - URA8	-77.7634	30	64.4	578	118	79	11	8	11	29	0.37931	1.39503	4.06897	1	20
c127	c127.a1	c127.a1.a1	Chassy_SC_534;N1P2B6;P49090; Asparagine synthetase [glutamine-hydrolyzing] 2 - ASN2	-156.48	44	64.5	572	296	154	22	14	26	25	1.04	9.96478	11.84	1	21
c596	c596.a1	c596.a1.a1	Chassy_SC_5339;N1P1C6;P38886; 26S proteasome regulatory subunit RPN10 - RPN10	-61.2247	37	29.6	268	96		7		8	8	1	9	12	1	20
c522	c522.a1	c522.a1.a1	Chassy_SC_5338;N1NWX9;Q12189; Ribose-5-phosphate isomerase - RKI1	-88.581	64	28.2	258	123		13		13	14	0.928571	7.48343	8.78571	1	16
b25	b25.a1	b25.a1.a1	Chassy_SC_5336;N1P439;P00924; Enolase 1 - ENO1	-378.979	80	46.7	437	1135	1123	45	45	65	13	5	99999	87.3077	1	21
c622	c622.a1	c622.a1.a1	Chassy_SC_5335;N1P073;P47137; Uncharacterized oxidoreductase YJR096W - YJR096W	-72.1697	60	32.2	282	90		13		14	18	0.777778	4.99484	5	1	16
c242	c242.a1	c242.a1.a1	Chassy_SC_5334;N1P2I0;P40495; Homoisocitrate dehydrogenase, mitochondrial - LYS12	-130.504	54	40	371	292		21		23	16	1.4375	26.3842	18.25	1	21
c507	c507.a1	c507.a1.a1	Chassy_SC_5330;N1P4W6;P29704; Squalene synthase - ERG9	-67.9037	29	51.6	444	130		13		14	16	0.875	6.49894	8.125	1	21
c170	c170.a1	c170.a1.a1	Chassy_SC_533;N1NYV0;Q06440; Coronin-like protein - CRN1	-206.54	48	72.4	651	375		28		32	28	1.14286	12.895	13.3929	1	21
d1244	d1244.a1	d1244.a1.a1	Chassy_SC_5329;N1P352;P37299; Cytochrome b-c1 complex subunit 10 - QCR10	-10.1911	35	8.5	77	15		2		2	3	0.666667	3.64159	5	1	13
c965	c965.a1	c965.a1.a1	Chassy_SC_5326;N1P9G4;P32904; 54S ribosomal protein L6, mitochondrial - MRPL6	-40.505	34	23.8	214	35		6		6	12	0.5	2.16228	2.91667	1	15
b50	b50.a1	b50.a1.a1	Chassy_SC_5323;N1P1P0;P32191; Glycerol-3-phosphate dehydrogenase, mitochondrial - GUT2	-338.878	72	72.2	649	789		47		59	34	1.73529	53.3618	23.2059	1	21
c382	c382.a1	c382.a1.a1	Chassy_SC_5320;N1P5X9;Q12377; 26S proteasome regulatory subunit RPN6 - RPN6	-97.7017	36	49.7	434	185		13		14	17	0.823529	5.66085	10.8824	1	21
d1054	d1054.a1	d1054.a1.a1	Chassy_SC_5316;N1P1U1;P46151; Methylenetetrahydrofolate reductase 1 - MET12	-22.5448	10	73.8	657	26		6		6	25	0.24	0.737801	1.04	1	15
b19	b19.a2	b19.a2.a1	Chassy_SC_5313;N1P334;P06105; Protein SCP160 - SCP160	-293.929	44	134.6	1222	552	551	49	48	52	65	0.8	5.30957	8.49231	1	21
d2074	d2074.a1	d2074.a1.a1	Chassy_SC_5311;N1P9Q5;P38064; 54S ribosomal protein L16, mitochondrial - MRPL16	-4	6	26.4	232	1		1		1	11	0.0909091	0.232847	0.0909091	1	1
c391	c391.a1	c391.a1.a1	Chassy_SC_531;N1P5R9;P49095; Glycine dehydrogenase (decarboxylating), mitochondrial - GCV2	-149.485	32	114.3	1034	179		23		24	33	0.727273	4.3367	5.42424	1	21
d2030	d2030.a1	d2030.a1.a1	Chassy_SC_5309;N1P2Z9;P36068; SWI5-dependent HO expression protein 2 - SHE2	-2.18709	5	28.2	246	1		1		1	9	0.111111	0.29155	0.111111	1	1
d1788	d1788.a1	d1788.a1.a1	Chassy_SC_5307;N1NX31;P32864; Rab proteins geranylgeranyltransferase component A - MRS6	-2.65758	1	67.2	603	2		1		1	17	0.0588235	0.145048	0.117647	1	2
d1393	d1393.a1	d1393.a1.a1	Chassy_SC_5306;N1NZ43;Q12292; Autophagy-related protein 34 - ATG34	-9.11634	7	46.5	412	10		2		2	18	0.111111	0.29155	0.555556	1	8
c238	c238.a1	c238.a1.a1	Chassy_SC_5305;N1NZV4;P32074; Coatomer subunit gamma - SEC21	-196.679	38	104.6	935	297		28		31	43	0.72093	4.25933	6.90698	1	21
c680	c680.a1	c680.a1.a1	Chassy_SC_5304;N1P449;P38626; NADH-cytochrome b5 reductase 1 - CBR1	-45.2004	34	31.4	284	77		9		11	17	0.647059	3.43669	4.52941	1	21
c671	c671.a2	c671.a2.a1	Chassy_SC_5302;N1NW96;P29295; Casein kinase I homolog HRR25 - HRR25	-10.198	5	57.2	494	16	9	3	2	3	20	0.15	0.412538	0.8	1	12
d1487	d1487.a1	d1487.a1.a1	Chassy_SC_5301;N1P6Y1;P50108; Probable alpha-1,6-mannosyltransferase MNN10 - MNN10	-3.50864	1	46.6	393	8		1		1	18	0.0555556	0.136464	0.444444	1	8
d1624	d1624.a1	d1624.a1.a1	Chassy_SC_530;N1PA11;P53048; General alpha-glucoside permease - MAL11	-16.5272	4	67.8	616	5		2		2	10	0.2	0.584893	0.5	1	3
c854	c854.a1	c854.a1.a1	Chassy_SC_53;N1P1U3;P21827; Guanine nucleotide exchange factor SRM1 - SRM1	-39.3114	21	52.9	482	46		7		7	13	0.538462	2.45511	3.53846	1	15
b62	b62.a2	b62.a2.a1	Chassy_SC_5294;N1P7R0;P21954; Isocitrate dehydrogenase [NADP], mitochondrial - IDP1	-160.398	49	48.1	428	352	258	22	16	27	21	1.28571	18.307	16.7619	1	21
c732	c732.a1	c732.a1.a1	Chassy_SC_5293;N1P7Q5;Q04410; GRASP65 homolog protein 1 - GRH1	-43.9202	26	41	372	64		7		7	10	0.7	4.01187	6.4	1	15
b66	b66.a1	b66.a1.a1	Chassy_SC_5292;N1P3F9;P07244; Bifunctional purine biosynthetic protein ADE5,7 - ADE5,7	-310.583	57	85.9	802	667		33		40	33	1.21212	15.2975	20.2121	1	21
d1052	d1052.a1	d1052.a1.a1	Chassy_SC_5288;N1P7E5;P20051; Dihydroorotase - URA4	-19.7955	17	40.3	364	26		4		5	16	0.3125	1.05353	1.625	1	14
c347	c347.a2	c347.a2.a1	Chassy_SC_5286;N1P7N1;P19146; ADP-ribosylation factor 2 - ARF2	-66.2202	57	20.6	181	152	25	9	2	11	8	1.375	22.7137	19	1	21
c592	c592.a1	c592.a1.a2	Chassy_SC_5285;N1NYM5;P0C0T4; 40S ribosomal protein S25-B - RPS25B	-38.326	29	11.9	108	97		4		6	2	3	999	48.5	2	21
d1064	d1064.a1	d1064.a1.a1	Chassy_SC_5284;N1P8K9;P20049; Prephenate dehydrogenase [NADP(+)] - TYR1	-16.5784	8	50.8	452	25		3		3	24	0.125	0.333521	1.04167	1	14
c645	c645.a1	c645.a1.a1	Chassy_SC_5282;N1P0D5;P33201; Ribosome assembly factor MRT4 - MRT4	-56.6642	40	27	236	84		9		9	11	0.818182	5.57933	7.63636	1	19
c224	c224.a1	c224.a1.a1	Chassy_SC_5279;N1P6I4;P31688; Trehalose-phosphatase - TPS2	-147.522	32	102.8	896	317		24		26	37	0.702703	4.04316	8.56757	1	21
c256	c256.a2	c256.a2.a1	Chassy_SC_5277;N1NZV9;P53834; Hsp90 co-chaperone HCH1 - HCH1	-33.4531	43	17.2	153	36	35	6	5	6	8	0.75	4.62341	4.5	1	19
d1609	d1609.a1	d1609.a1.a1	Chassy_SC_5276;N1NVV2;Q03010; Transcriptional regulatory protein UME1 - UME1	-10.164	7	50.9	460	5		3		3	20	0.15	0.412538	0.25	1	5
c998	c998.a1	c998.a1.a1	Chassy_SC_5274;N1P1C8;Q05812; Meiotic sister-chromatid recombination protein 3 - MSC3	-43.3269	11	80.4	728	31		6		6	29	0.206897	0.610262	1.06897	1	13
d1737	d1737.a1	d1737.a1.a1	Chassy_SC_5272;N1NX33;Q02948; Vacuolar protein sorting-associated protein 30 - VPS30	-2.61979	1	63.1	557	3		1		1	24	0.0416667	0.100694	0.125	1	3
c591	c591.a1	c591.a1.a1	Chassy_SC_5271;N1P4B9;P32381; Actin-related protein 2 - ARP2	-55.605	30	44	391	98		8		9	17	0.529412	2.38386	5.76471	1	21
c549	c549.a1	c549.a1.a1	Chassy_SC_527;N1P611;(P0CX85-P0CX84);60S ribosomal protein L35- NA	-41.2678	33	14.7	127	113		6		10	4	2.5	315.228	28.25	1	21
d1404	d1404.a1	d1404.a1.a1	Chassy_SC_5269;N1NY09;Q08920; Nuclear cap-binding protein subunit 2 - CBC2	-7.5784	13	23.7	208	10		2		2	9	0.222222	0.668101	1.11111	1	10
d1864	d1864.a1	d1864.a1.a1	Chassy_SC_5266;N1P0W3;P40481; Histidine protein methyltransferase 1 - HPM1	-7.93181	6	42.4	377	2		2		2	13	0.153846	0.425103	0.153846	1	2
d1385	d1385.a1	d1385.a1.a1	Chassy_SC_5263;N1NWG7;P38930; Casein kinase II subunit beta' - CKB2	-3.63827	3	29.7	258	10		1		1	8	0.125	0.333521	1.25	1	10
d1710	d1710.a1	d1710.a1.a1	Chassy_SC_5262;N1P1R9;P47158; Putative transferase CAF17, mitochondrial - IBA57	-3.88606	2	56.9	497	3		1		1	26	0.0384615	0.0926009	0.115385	1	3
d2008	d2008.a1	d2008.a1.a1	Chassy_SC_5261;N1NZ31;P34251; Uncharacterized oxidoreductase YKL107W - YKL107W	-2.07572	4	34.4	309	1		1		1	18	0.0555556	0.136464	0.0555556	1	1
c380	c380.a1	c380.a1.a1	Chassy_SC_5259;N1NZH6;Q03048; Cofilin - COF1	-73.256	72	15.8	143	186		7		8	4	2	99	46.5	1	21
b87	b87.a1	b87.a1.a1	Chassy_SC_5258;N1NYE0;P38011; Guanine nucleotide-binding protein subunit beta-like protein - ASC1	-189.526	80	34.7	319	575		17		26	12	2.16667	145.78	47.9167	1	21
d1822	d1822.a1	d1822.a1.a1	Chassy_SC_5257;N1NWT7;P53729; Uncharacterized protein YNR029C - YNR029C	-6.52651	7	48	429	2		2		2	20	0.1	0.258925	0.1	1	2
c488	c488.a1	c488.a1.a1	Chassy_SC_5254;N1P975;P32521; Actin cytoskeleton-regulatory complex protein PAN1 - PAN1	-123.151	20	160	1480	135		20		20	37	0.540541	2.47169	3.64865	1	20
d1746	d1746.a1	d1746.a1.a1	Chassy_SC_5250;N1P154;P47124; Putative glycosyltransferase HOC1 - HOC1	-5.92227	5	46.2	396	3		2		2	14	0.142857	0.389495	0.214286	1	2
d1308	d1308.a1	d1308.a1.a1	Chassy_SC_5249;N1P098;Q03103; Endoplasmic oxidoreductin-1 - ERO1	-19.3054	8	64.9	563	13		4		4	24	0.166667	0.467799	0.541667	1	7
d1772	d1772.a1	d1772.a1.a1	Chassy_SC_5248;N1P3T5;P39927; Protein PTI1 - PTI1	-9.07572	3	46.9	425	3		1		1	10	0.1	0.258925	0.3	1	3
d1255	d1255.a1	d1255.a1.a1	Chassy_SC_5247;N1NZS8;Q06010; A-factor-processing enzyme - STE23	-22.4045	10	111.5	975	15		6		6	47	0.12766	0.341713	0.319149	1	8
c492	c492.a1	c492.a1.a1	Chassy_SC_5245;N1P8W6;Q04062; 26S proteasome regulatory subunit RPN9 - RPN9	-72.1326	35	45.7	393	135		13		14	18	0.777778	4.99484	7.5	1	21
d1305	d1305.a1	d1305.a1.a1	Chassy_SC_5244;N1P5H9;Q04304; UPF0659 protein YMR090W - YMR090W	-24.6577	22	24.8	227	13		4		4	12	0.333333	1.15443	1.08333	1	7
d1717	d1717.a1	d1717.a1.a1	Chassy_SC_5240;N1P4T8;P38856; Clathrin coat assembly protein AP180A - YAP1801	-9.81873	5	71.5	637	3		2		2	10	0.2	0.584893	0.3	1	3
c505	c505.a1	c505.a1.a1	Chassy_SC_5237;N1P813;P38081; Uncharacterized glycosyl hydrolase YBR056W - YBR056W	-91.3119	33	57.7	501	130		15		16	22	0.727273	4.3367	5.90909	1	21
d2026	d2026.a1	d2026.a1.a1	Chassy_SC_5232;N1P1Q2;Q02770; Peptidyl-prolyl isomerase CWC27 - CWC27	-2.19382	2	34.9	301	1		1		1	17	0.0588235	0.145048	0.0588235	1	1
d2018	d2018.a1	d2018.a1.a1	Chassy_SC_5230;N1NYH9;P29496; Minichromosome maintenance protein 5 - MCM5	-3.45593	1	86.2	775	1		1		1	39	0.025641	0.0608184	0.025641	1	1
d1799	d1799.a1	d1799.a1.a1	Chassy_SC_523;N1P8C3;P32909; Protein SMY2 - SMY2	-4.30619	2	81.2	740	2		2		2	25	0.08	0.202264	0.08	1	2
c625	c625.a2	c625.a2.a1	Chassy_SC_5229;N1NXB8;P18961; Serine/threonine-protein kinase YPK2/YKR2 - YPK2	-47.2699	19	76.6	677	61	12	10	5	11	30	0.366667	1.32631	2.03333	1	16
d1549	d1549.a1	d1549.a1.a1	Chassy_SC_5227;N1P8K6;P38992; Sphingolipid C4-hydroxylase SUR2 - SUR2	-5.79588	2	40.6	349	6		1		1	10	0.1	0.258925	0.6	1	6
c313	c313.a3	c313.a3.a1	Chassy_SC_5223;N1NZW8;Q99260; GTP-binding protein YPT6 - YPT6	-16.0585	18	24.3	215	49	13	4	3	4	11	0.363636	1.31013	4.45455	1	21
d1741	d1741.a1	d1741.a1.a1	Chassy_SC_5221;N1P390;P43600; Uncharacterized protein YFR020W - YFR020W	-4.67778	4	25.5	232	3		1		1	7	0.142857	0.389495	0.428571	1	3
c630	c630.a1	c630.a1.a1	Chassy_SC_5220;N1P465;P53334; Probable family 17 glucosidase SCW4 - SCW4	-56.5032	27	40.1	386	88		8		9	13	0.692308	3.92388	6.76923	1	16
c236	c236.a1	c236.a1.a1	Chassy_SC_522;N1P0Y5;P47068; Myosin tail region-interacting protein MTI1 - BBC1	-165.488	27	128.1	1157	297		29		31	50	0.62	3.16869	5.94	1	21
d1798	d1798.a1	d1798.a1.a1	Chassy_SC_5216;N1P7N8;P25632; Chromatin structure-remodeling complex protein RSC6 - RSC6	-5.24207	4	54.1	483	2		2		2	19	0.105263	0.274275	0.105263	1	2
d1961	d1961.a1	d1961.a1.a1	Chassy_SC_5212;N1P6Z8;P40046; Vacuolar transporter chaperone 1 - VTC1	-3.16115	6	14.3	129	1		1		1	5	0.2	0.584893	0.2	1	1
b73	b73.a2	b73.a2.a1	Chassy_SC_5209;N1NYE5;P53691; Peptidyl-prolyl cis-trans isomerase CPR6 - CPR6	-109.955	53	36.9	326	206	201	17	16	19	15	1.26667	17.4785	13.7333	1	21
c317	c317.a1	c317.a1.a1	Chassy_SC_5208;N1NX25;Q08977; UPF0662 protein YPL260W - YPL260W	-132.605	55	62.6	551	230		24		25	24	1.04167	10.0069	9.58333	1	21
d1368	d1368.a1	d1368.a1.a1	Chassy_SC_5199;N1P6A0;P35178; Ribosomal RNA-processing protein 1 - RRP1	-3.40894	3	33.1	278	11		1		1	13	0.0769231	0.193777	0.846154	1	11
c738	c738.a1	c738.a1.a1	Chassy_SC_5195;N1P192;P38858; 6-phosphogluconolactonase 3 - SOL3	-71.6331	62	27.7	249	63		12		14	13	1.07692	10.9378	4.84615	1	12
b19	b19.a1	b19.a1.a1	Chassy_SC_5191;N1NZF4;Q02207; Peroxisomal hydratase-dehydrogenase-epimerase - FOX2	-454.145	71	98.5	900	887	886	59	58	74	47	1.57447	36.5377	18.8723	1	20
c136	c136.a2	c136.a2.a1	Chassy_SC_5190;N1P6J4;P29453; 60S ribosomal protein L8-B - RPL8B	-160.897	69	28	256	369	46	24	4	30	15	2	99	24.6	1	21
d1821	d1821.a1	d1821.a1.a1	Chassy_SC_519;N1P9P4;P22434; 3',5'-cyclic-nucleotide phosphodiesterase 1 - PDE1	-4.07248	4	41.9	369	2		2		2	15	0.133333	0.359356	0.133333	1	2
c568	c568.a1	c568.a1.a1	Chassy_SC_5189;N1NY50;P27692; Transcription elongation factor SPT5 - SPT5	-72.4119	14	115.5	1063	107		12		12	42	0.285714	0.930698	2.54762	1	21
d2080	d2080.a1	d2080.a1.a1	Chassy_SC_5186;N1P5Q2;P05318; 60S acidic ribosomal protein P1-alpha - RPP1A	-2.48149	20	10.8	106	1		1		1	3	0.333333	1.15443	0.333333	1	1
d1176	d1176.a1	d1176.a1.a1	Chassy_SC_5182;N1P2I4;P38874; Elongator complex protein 5 - IKI1	-13.6073	7	35.2	309	19		2		2	10	0.2	0.584893	1.9	1	15
d1990	d1990.a1	d1990.a1.a2	Chassy_SC_5177;N1NYY7;P33328; Synaptobrevin homolog 2 - SNC2	-2.82391	6	12.9	115	1		1		1	2	0.5	2.16228	0.5	2	1
d1401	d1401.a1	d1401.a1.a1	Chassy_SC_5175;N1P9X1;P37293; Putative N-terminal acetyltransferase 2 - NAT2	-11.4744	10	32.7	288	10		2		2	13	0.153846	0.425103	0.769231	1	8
d2059	d2059.a1	d2059.a1.a1	Chassy_SC_5173;N1P5A1;Q04228; UBX domain-containing protein 2 - UBX2	-5.92082	2	66.6	584	1		1		1	20	0.05	0.122018	0.05	1	1
c369	c369.a1	c369.a1.a1	Chassy_SC_5172;N1P0U1;P12683; 3-hydroxy-3-methylglutaryl-coenzyme A reductase 1 - HMG1	-107.258	19	115.4	1054	193		18		20	32	0.625	3.21697	6.03125	1	21
d1706	d1706.a1	d1706.a1.a1	Chassy_SC_5170;N1NYJ2;Q03219; Uncharacterized protein YMR178W - YMR178W	-5.44745	8	31	274	3		2		2	12	0.166667	0.467799	0.25	1	2
c233	c233.a1	c233.a1.a1	Chassy_SC_517;N1NXW8;P54839; Hydroxymethylglutaryl-CoA synthase - ERG13	-116.073	40	54.9	491	309		16		21	23	0.913043	7.18547	13.4348	1	21
d2036	d2036.a1	d2036.a1.a1	Chassy_SC_5167;N1P7C5;Q03327; Mitochondrial fusion and transport protein UGO1 - UGO1	-2.95861	1	57.4	502	1		1		1	22	0.0454545	0.110336	0.0454545	1	1
d1039	d1039.a1	d1039.a1.a1	Chassy_SC_5165;N1P5C6;P40086; Cytochrome c oxidase assembly protein COX15 - COX15	-23.5747	10	54.5	486	27		5		5	20	0.25	0.778279	1.35	1	13
c406	c406.a1	c406.a1.a1	Chassy_SC_516;N1P5S1;P40016; 26S proteasome regulatory subunit RPN3 - RPN3	-99.0431	36	60.3	523	171		16		16	23	0.695652	3.96195	7.43478	1	21
d1985	d1985.a1	d1985.a1.a1	Chassy_SC_5159;N1P0J6;P36024;|reversed Phosphopantothenoylcysteine decarboxylase subunit SIS2 - SIS2	-2.07572	1	61.9	558	1		1		1	22	0.0454545	0.110336	0.0454545	1	1
d1157	d1157.a1	d1157.a1.a1	Chassy_SC_5158;N1NW62;P32486; Beta-glucan synthesis-associated protein KRE6 - KRE6	-15.3115	6	80	720	20		3		3	18	0.166667	0.467799	1.11111	1	10
d1868	d1868.a1	d1868.a1.a1	Chassy_SC_5157;N1NVG9;P15179; Aspartate--tRNA ligase, mitochondrial - MSD1	-6.29073	4	75.3	658	2		2		2	34	0.0588235	0.145048	0.0588235	1	1
c458	c458.a1	c458.a1.a1	Chassy_SC_5155;N1NWJ1;Q12464; RuvB-like protein 2 - RVB2	-96.7189	44	51.5	471	148		17		18	24	0.75	4.62341	6.16667	1	18
c653	c653.a1	c653.a1.a1	Chassy_SC_5154;N1P8N7;P38353; Sec sixty-one protein homolog - SSH1	-46.6852	15	53.2	490	82		5		6	11	0.545455	2.51119	7.45455	1	21
d1420	d1420.a1	d1420.a1.a1	Chassy_SC_5151;N1NZJ5;Q05871; 3,2-trans-enoyl-CoA isomerase - ECI1	-7.451	6	31.6	280	9		2		2	12	0.166667	0.467799	0.75	1	8
c508	c508.a1	c508.a1.a1	Chassy_SC_5150;N1PAX3;P32602; Alpha-soluble NSF attachment protein - SEC17	-87.1378	44	32.7	292	130		10		10	15	0.666667	3.64159	8.66667	1	21
d1485	d1485.a1	d1485.a1.a1	Chassy_SC_515;N1P3L7;P53254; U3 small nucleolar RNA-associated protein 22 - UTP22	-2.95861	0	140.2	1237	8		1		1	58	0.0172414	0.0404983	0.137931	1	8
c637	c637.a1	c637.a1.a1	Chassy_SC_5149;N1P151;P38821; Aspartyl aminopeptidase 4 - APE4	-79.6729	27	54	490	86		9		9	17	0.529412	2.38386	5.05882	1	19
c734	c734.a1	c734.a1.a2	Chassy_SC_5145;N1NY24;P07281; 40S ribosomal protein S19-B - RPS19B	-35.127	42	15.8	144	64		7		8	6	1.33333	20.5443	10.6667	2	19
c980	c980.a1	c980.a1.a1	Chassy_SC_5143;N1P5J1;Q12018; Cell division control protein 53 - CDC53	-28.7551	8	93.8	815	34		5		5	44	0.113636	0.299081	0.772727	1	15
c774	c774.a1	c774.a1.a2	Chassy_SC_5142;N1P432;P40525; 60S ribosomal protein L34-B - RPL34B	-19.2774	20	13.6	121	57		2		3	2	1.5	30.6228	28.5	2	21
c882	c882.a1	c882.a1.a1	Chassy_SC_5140;N1NZC6;P10507; Mitochondrial-processing peptidase subunit beta - MAS1	-30.7847	13	51	462	43		6		6	19	0.315789	1.06914	2.26316	1	15
d1623	d1623.a1	d1623.a1.a2	Chassy_SC_5139;N1P3A9;P38774; 2-deoxyglucose-6-phosphate phosphatase 1 - DOG1	-5.18046	8	27	246	5		2		2	10	0.2	0.584893	0.5	2	4
c528	c528.a1	c528.a1.a1	Chassy_SC_5137;N1NZB8;P20081; FK506-binding protein 1 - FPR1	-68.1741	82	12.1	114	120		9		9	8	1.125	12.3352	15	1	21
d1377	d1377.a1	d1377.a1.a1	Chassy_SC_5136;N1NVJ7;Q12406; Actin-related protein 7 - ARP7	-7.72125	2	53.7	477	11		1		1	23	0.0434783	0.105295	0.478261	1	11
c316	c316.a1	c316.a1.a1	Chassy_SC_5134;N1P637;P16649; General transcriptional corepressor TUP1 - TUP1	-124.479	38	78.8	718	230		21		21	32	0.65625	3.53158	7.1875	1	21
d1589	d1589.a1	d1589.a1.a1	Chassy_SC_5131;N1P5N7;Q03280; E3 ubiquitin-protein ligase TOM1 - TOM1	-12.1632	1	373.7	3268	6		4		4	141	0.0283688	0.0675022	0.0425532	1	4
c248	c248.a3	c248.a3.a1	Chassy_SC_513;N1PAJ3;P33298; 26S proteasome regulatory subunit 6B homolog - RPT3	-27.4194	15	47.8	428	55	20	5	4	5	16	0.3125	1.05353	3.4375	1	21
d1138	d1138.a1	d1138.a1.a1	Chassy_SC_5129;N1NYQ3;Q05931; Heat shock protein SSQ1, mitochondrial - SSQ1	-26.6803	13	72.2	657	21		7		7	22	0.318182	1.08057	0.954545	1	12
d2023	d2023.a1	d2023.a1.a2	Chassy_SC_5125;N1P1H4;Q03016; GLC7-interacting protein 3 - GIP3	-2.20761	0	140.6	1276	1		1		1	51	0.0196078	0.0461834	0.0196078	2	1
d1607	d1607.a1	d1607.a1.a2	Chassy_SC_5124;N1NY01;P53616; Probable secreted beta-glucosidase SUN4 - SUN4	-6.4437	3	40.4	389	5		1		1	5	0.2	0.584893	1	2	5
d1298	d1298.a1	d1298.a1.a1	Chassy_SC_5123;N1P8V3;P47148; Uncharacterized protein YJR111C - YJR111C	-11.1232	10	32.1	283	13		3		3	12	0.25	0.778279	1.08333	1	10
d2047	d2047.a1	d2047.a1.a1	Chassy_SC_5121;N1NYN2;P18851; Guanine nucleotide-binding protein subunit beta - STE4	-2.52288	2	46.5	423	1		1		1	11	0.0909091	0.232847	0.0909091	1	1
c974	c974.a1	c974.a1.a1	Chassy_SC_5120;N1P4D2;Q12451; Oxysterol-binding protein homolog 2 - OSH2	-21.2967	5	145.6	1283	34		6		6	51	0.117647	0.311134	0.666667	1	17
d1547	d1547.a1	d1547.a1.a1	Chassy_SC_5119;N1P2D4;P49573; Copper transport protein CTR1 - CTR1	-4.05061	4	44.3	406	6		1		1	14	0.0714286	0.178769	0.428571	1	6
c161	c161.a1	c161.a1.a1	Chassy_SC_5118;N1P0Y7;P04801; Threonine--tRNA ligase, cytoplasmic - THS1	-173.624	38	84.3	734	384		27		30	37	0.810811	5.46861	10.3784	1	21
d1179	d1179.a1	d1179.a1.a1	Chassy_SC_5116;N1P8G1;P47031; Mitochondrial outer membrane protein IML2 - IML2	-31.7348	10	82.4	731	19		6		6	31	0.193548	0.561523	0.612903	1	9
c119	c119.a1	c119.a1.a1	Chassy_SC_5114;N1P0I8;P10081; ATP-dependent RNA helicase eIF4A - TIF1	-201.794	74	44.6	395	481		25		31	20	1.55	34.4813	24.05	1	21
d1578	d1578.a1	d1578.a1.a1	Chassy_SC_5112;N1P1D0;P11792; Serine/threonine-protein kinase SCH9 - SCH9	-13.9304	4	91.6	824	6		3		3	19	0.157895	0.43845	0.315789	1	5
c400	c400.a1	c400.a1.a1	Chassy_SC_5111;N1NY70;Q12118; Small glutamine-rich tetratricopeptide repeat-containing protein 2 - SGT2	-98.6195	36	37.1	346	174		12		13	14	0.928571	7.48343	12.4286	1	21
d1071	d1071.a1	d1071.a1.a1	Chassy_SC_511;N1NW33;P48527; Tyrosine--tRNA ligase, mitochondrial - MSY1	-26.0204	14	55.2	492	25		6		6	22	0.272727	0.873817	1.13636	1	12
c553	c553.a1	c553.a1.a1	Chassy_SC_5105;N1P7L5;P32471; Elongation factor 1-beta - EFB1	-53.2864	58	22.5	206	112		8		12	9	1.33333	20.5443	12.4444	1	21
c546	c546.a1	c546.a1.a1	Chassy_SC_5100;N1P264;P38687; Signal recognition particle subunit SRP68 - SRP68	-93.0437	33	68.9	599	114		15		16	25	0.64	3.36516	4.56	1	15
c319	c319.a1	c319.a1.a1	Chassy_SC_510;N1P3C8;P21243; Proteasome subunit alpha type-1 - SCL1	-140.319	71	27.9	252	229		18		20	17	1.17647	14.0131	13.4706	1	21
b27	b27.a1	b27.a1.a1	Chassy_SC_5099;N1NZK6;P31539; Heat shock protein 104 - HSP104	-482.359	67	101.9	908	1178		59		75	41	1.82927	66.4945	28.7317	1	21
c116	c116.a1	c116.a1.a1	Chassy_SC_5098;N1P9T2;P07264; 3-isopropylmalate dehydratase - LEU1	-247.775	50	85.6	779	484		33		39	30	1.3	18.9526	16.1333	1	21
c701	c701.a2	c701.a2.a1	Chassy_SC_5092;N1P2L5;Q02201; Oxysterol-binding protein homolog 6 - OSH6	-18.1947	10	51.5	448	22	5	5	2	5	23	0.217391	0.649648	0.956522	1	18
c984	c984.a1	c984.a1.a1	Chassy_SC_5091;N1NZG1;P42846; Protein KRI1 - KRI1	-29.4747	17	68.5	591	33		7		7	19	0.368421	1.33572	1.73684	1	14
c563	c563.a1	c563.a1.a1	Chassy_SC_5089;N1PA50;P25451; Proteasome subunit beta type-3 - PUP3	-63.2934	37	22.5	205	109		8		10	7	1.42857	25.827	15.5714	1	19
d2021	d2021.a1	d2021.a1.a1	Chassy_SC_5088;N1P028;Q06488; Chromatin structure-remodeling complex subunit RSC2 - RSC2	-2.34679	1	102.1	889	1		1		1	42	0.0238095	0.0563541	0.0238095	1	1
d1786	d1786.a1	d1786.a1.a1	Chassy_SC_5087;N1P574;P40052; Uncharacterized protein YER079W - YER079W	-3.00436	4	23.1	210	2		1		1	10	0.1	0.258925	0.2	1	2
d1540	d1540.a1	d1540.a1.a1	Chassy_SC_5086;N1P2G5;P38862; Ubiquitin-like modifier-activating enzyme ATG7 - ATG7	-8.16494	3	71.3	630	7		2		2	37	0.0540541	0.132541	0.189189	1	6
d1280	d1280.a1	d1280.a1.a1	Chassy_SC_5084;N1P8Y2;P35845; Oxysterol-binding protein homolog 1 - SWH1	-19.492	4	134.9	1190	14		4		4	52	0.0769231	0.193777	0.269231	1	9
c469	c469.a1	c469.a1.a1	Chassy_SC_5081;N1P2R7;P36148; Glycerol-3-phosphate O-acyltransferase 2 - GPT2	-92.6397	27	83.5	743	145		15		16	30	0.533333	2.41455	4.83333	1	21
d1158	d1158.a1	d1158.a1.a1	Chassy_SC_5080;N1P129;P38804; Restriction of telomere capping protein 3 - RTC3	-23.75	46	11.9	111	20		4		4	6	0.666667	3.64159	3.33333	1	10
c893	c893.a1	c893.a1.a1	Chassy_SC_508;N1P8I8;Q05584; Hydroxyacylglutathione hydrolase, cytoplasmic isozyme - GLO2	-46.7512	32	31.2	274	42		7		7	12	0.583333	2.83119	3.5	1	10
d1336	d1336.a1	d1336.a1.a1	Chassy_SC_5079;N1P8T3;Q3E776; Uncharacterized protein YBR255C-A - YBR255C-A	-7.95861	10	13.7	120	12		1		1	6	0.166667	0.467799	2	1	10
d1903	d1903.a1	d1903.a1.a1	Chassy_SC_5078;N1P5F9;P53063; Decapping nuclease RAI1 - RAI1	-2.61979	2	44.4	387	1		1		1	21	0.047619	0.115884	0.047619	1	1
c580	c580.a1	c580.a1.a1	Chassy_SC_5076;N1P9S1;P53184; Nicotinamidase - PNC1	-50.6225	47	24.9	216	103		6		10	11	0.909091	7.11131	9.36364	1	21
b25	b25.a2	b25.a2.a1	Chassy_SC_5072;N1P336;P38689; Ribose-phosphate pyrophosphokinase 3 - PRS3	-64.5865	33	35	320	112	107	11	10	11	16	0.6875	3.86968	7	1	21
c338	c338.a1	c338.a1.a1	Chassy_SC_5071;N1P4S7;P40024; ABC transporter ATP-binding protein ARB1 - ARB1	-150.753	35	68.2	610	214		21		23	22	1.04545	10.1034	9.72727	1	21
c284	c284.a1	c284.a1.a1	Chassy_SC_5067;N1P9B0;P40482; Protein transport protein SEC24 - SEC24	-136.475	29	103.4	926	252		22		25	34	0.735294	4.43618	7.41176	1	21
d1983	d1983.a1	d1983.a1.a1	Chassy_SC_5066;N1P0P6;P36100; Transcription initiation factor IIE subunit alpha - TFA1	-2.33724	1	54.6	482	1		1		1	20	0.05	0.122018	0.05	1	1
d1815	d1815.a1	d1815.a1.a1	Chassy_SC_5065;N1NXJ5;P08425; Phenylalanine--tRNA ligase, mitochondrial - MSF1	-4.63302	4	55.2	474	2		2		2	24	0.0833333	0.211528	0.0833333	1	2
d1844	d1844.a1	d1844.a1.a1	Chassy_SC_5064;N1NVH1;P21825; Translocation protein SEC62 - SEC62	-7.2161	13	31.2	274	2		2		2	12	0.166667	0.467799	0.166667	1	1
d1178	d1178.a1	d1178.a1.a1	Chassy_SC_5063;N1NVI8;P53600; Coatomer subunit zeta - RET3	-12.7158	12	21.6	189	19		2		2	7	0.285714	0.930698	2.71429	1	11
c961	c961.a1	c961.a1.a1	Chassy_SC_5060;N1P831;Q12298; Uncharacterized ABC transporter ATP-binding protein YDR061W - YDR061W	-47.5575	20	61	539	36		8		8	26	0.307692	1.03092	1.38462	1	15
c198	c198.a1	c198.a1.a1	Chassy_SC_5059;N1NZ91;P38013; Peroxiredoxin AHP1 - AHP1	-118.167	84	19	176	340		11		18	7	2.57143	371.759	48.5714	1	21
d2051	d2051.a1	d2051.a1.a1	Chassy_SC_5058;N1P3T6;P53219; Abhydrolase domain-containing protein IMO32 - IMO32	-2.08092	2	38.4	342	1		1		1	19	0.0526316	0.128838	0.0526316	1	1
b73	b73.a4	b73.a4.a1	Chassy_SC_5052;N1P573;P35176; Peptidyl-prolyl cis-trans isomerase D - CPR5	-44.4507	41	25.2	225	56	53	7	6	8	11	0.727273	4.3367	5.09091	1	15
d1333	d1333.a1	d1333.a1.a1	Chassy_SC_505;N1P9R4;P32319; Vacuolar protein sorting/targeting protein VPS10 - PEP1	-14.7413	2	177.5	1579	12		3		3	56	0.0535714	0.131283	0.214286	1	10
d1128	d1128.a1	d1128.a1.a1	Chassy_SC_5048;N1P4A4;P42941; Phosphoserine phosphatase - SER2	-18.6615	16	34.1	309	22		4		4	13	0.307692	1.03092	1.69231	1	10
d1360	d1360.a1	d1360.a1.a1	Chassy_SC_5045;N1NXQ1;P40343; Vacuolar protein sorting-associated protein 27 - VPS27	-18.7941	8	70.8	622	11		4		4	28	0.142857	0.389495	0.392857	1	7
d1520	d1520.a1	d1520.a1.a1	Chassy_SC_504;N1P1K0;P46959; tRNA (adenine(58)-N(1))-methyltransferase catalytic subunit TRM61 - GCD14	-13.8239	4	43.8	383	7		1		1	19	0.0526316	0.128838	0.368421	1	7
d1038	d1038.a1	d1038.a1.a1	Chassy_SC_5039;N1NY56;P32939; GTP-binding protein YPT7 - YPT7	-30.6621	32	20.4	184	28		4		4	8	0.5	2.16228	3.5	1	14
c981	c981.a1	c981.a1.a1	Chassy_SC_5036;N1P233;P53220; Mitochondrial import inner membrane translocase subunit TIM21 - TIM21	-12.0246	8	27.1	239	33		2		2	9	0.222222	0.668101	3.66667	1	20
d1361	d1361.a1	d1361.a1.a1	Chassy_SC_5035;N1NXU1;P53741; UBP3-associated protein BRE5 - BRE5	-7.85263	6	57.5	515	11		2		2	21	0.0952381	0.245197	0.52381	1	8
c415	c415.a1	c415.a1.a1	Chassy_SC_5034;N1P4J6;CENPK specific;No description in SC288c, annotation and gene name in CENPK: 3-hydroxyisobutyryl-CoA hydrolase, mitochondrial -CENPK1137D_3857	-99.3475	36	55.7	500	168		15		17	22	0.772727	4.92553	7.63636	1	21
c274	c274.a1	c274.a1.a1	Chassy_SC_5027;N1P4I8;Q12335; Protoplast secreted protein 2 - PST2	-94.8371	78	20.9	198	261		9		13	5	2.6	397.107	52.2	1	21
b11	b11.a1	b11.a1.a1	Chassy_SC_5025;N1P731;P22202; Heat shock protein SSA4 - SSA4	-290.326	62	69.5	642	859	302	35	19	46	23	2	99	37.3478	1	21
c761	c761.a1	c761.a1.a1	Chassy_SC_5020;N1NW59;Q06523; Uncharacterized protein YPR148C - YPR148C	-60.0535	44	49.2	435	58		12		13	18	0.722222	4.275	3.22222	1	15
d1842	d1842.a1	d1842.a1.a1	Chassy_SC_502;N1NVH8;Q02784; Monothiol glutaredoxin-5, mitochondrial - GRX5	-4.56384	21	16.8	150	2		2		2	6	0.333333	1.15443	0.333333	1	2
b71	b71.a1	b71.a1.a1	Chassy_SC_5016;N1P1Y6;P33442; 40S ribosomal protein S1-A - RPS1A	-218.34	68	28.6	255	563	101	27	6	38	14	2.71429	516.947	40.2143	1	21
d1110	d1110.a1	d1110.a1.a1	Chassy_SC_5012;N1P6K1;P15731; Ubiquitin-conjugating enzyme E2 4 - UBC4	-12.6133	37	16.4	148	18	8	3	2	3	3	1	9	6	1	13
d1756	d1756.a1	d1756.a1.a1	Chassy_SC_5010;N1P9K6;P24583; Protein kinase C-like 1 - PKC1	-5.93855	1	131.3	1151	3		2		2	54	0.037037	0.089023	0.0555556	1	2
c673	c673.a1	c673.a1.a1	Chassy_SC_501;N1NWH7;P19454; Casein kinase II subunit alpha' - CKA2	-43.9073	22	39.3	339	78		6		7	15	0.466667	1.92864	5.2	1	21
d1506	d1506.a1	d1506.a1.a1	Chassy_SC_5009;N1P862;Q02774; Secretory component protein SHR3 - SHR3	-3.25181	3	23.4	210	7		1		1	1	1	9	7	1	7
c707	c707.a1	c707.a1.a1	Chassy_SC_5008;N1P469;P53295; Ribosome-interacting GTPase 2 - RBG2	-53.2222	30	40.9	368	70		8		8	18	0.444444	1.78256	3.88889	1	15
c803	c803.a1	c803.a1.a1	Chassy_SC_5002;N1P9I5;P38879; Nascent polypeptide-associated complex subunit alpha - EGD2	-22.6364	23	18.6	174	53		3		4	7	0.571429	2.72759	7.57143	1	18
c443	c443.a1	c443.a1.a1	Chassy_SC_500;N1P478;P36421; Tyrosine--tRNA ligase, cytoplasmic - TYS1	-79.309	35	43.9	394	154		13		14	21	0.666667	3.64159	7.33333	1	21
c869	c869.a1	c869.a1.a1	Chassy_SC_50;N1P0S6;P40582; Glutathione S-transferase 1 - GTT1	-38.1163	25	26.7	234	44		6		7	10	0.7	4.01187	4.4	1	9
d1930	d1930.a1	d1930.a1.a1	Chassy_SC_5;N1P312;P26793; Flap endonuclease 1 - RAD27	-2.88606	2	43.2	382	1		1		1	14	0.0714286	0.178769	0.0714286	1	1
c151	c151.a2	c151.a2.a1	Chassy_SC_4997;N1PAM7;P04050; DNA-directed RNA polymerase II subunit RPB1 - RPO21	-121.288	16	191.3	1733	190	182	25	24	25	64	0.390625	1.45824	2.96875	1	21
d1894	d1894.a1	d1894.a1.a1	Chassy_SC_4996;N1P8N6;Q06683;|reversed Putative ATP-dependent helicase IRC3 - IRC3	-2.38722	1	78.4	689	1		1		1	33	0.030303	0.0722672	0.030303	1	1
c311	c311.a2	c311.a2.a1	Chassy_SC_4995;N1NZL3;P04821; Cell division control protein 25 - CDC25	-6.18046	1	178.8	1589	4	3	2	1	2	61	0.0327869	0.0784174	0.0655738	1	4
d1254	d1254.a1	d1254.a1.a1	Chassy_SC_4993;N1NWX4;Q12012; Uncharacterized protein YOR289W - YOR289W	-25.7971	24	29	251	15		6		6	12	0.5	2.16228	1.25	1	9
d1394	d1394.a1	d1394.a1.a1	Chassy_SC_4983;N1P9Y2;P13259; Choline-phosphate cytidylyltransferase - PCT1	-18.6988	16	49.3	424	10		6		6	17	0.352941	1.25393	0.588235	1	7
d1277	d1277.a1	d1277.a1.a1	Chassy_SC_4980;N1P1R8;P40564; DnaJ-like protein 1 - DJP1	-28.4747	20	48.5	432	14		7		7	21	0.333333	1.15443	0.666667	1	8
c537	c537.a1	c537.a1.a1	Chassy_SC_498;N1P1X8;P07172; Histidinol-phosphate aminotransferase - HIS5	-67.7568	34	42.5	385	116		11		12	14	0.857143	6.19686	8.28571	1	21
c261	c261.a1	c261.a1.a1	Chassy_SC_4976;N1NZ92;P09733; Tubulin alpha-1 chain - TUB1	-92.3998	32	49.7	447	220	144	11	7	14	17	0.823529	5.66085	12.9412	1	21
c286	c286.a1	c286.a1.a1	Chassy_SC_4975;N1NYD4;P26786; 40S ribosomal protein S7-A - RPS7A	-77.3616	69	21.5	190	196	159	12	7	15	7	2.14286	137.95	28	1	21
d1061	d1061.a1	d1061.a1.a1	Chassy_SC_4974;N1P9F7;P38254; Probable tubulin--tyrosine ligase PBY1 - PBY1	-32.4043	12	86.2	753	26		7		7	35	0.2	0.584893	0.742857	1	12
d1672	d1672.a1	d1672.a1.a1	Chassy_SC_4973;N1P5Y8;P38428; Coupling of ubiquitin conjugation to ER degradation protein 1 - CUE1	-5.42022	7	22.7	203	4		1		1	11	0.0909091	0.232847	0.363636	1	4
c103	c103.a1	c103.a1.a1	Chassy_SC_4972;N1P3S8;P23301; Eukaryotic translation initiation factor 5A-1 - HYP2	-161.018	70	17	157	506	481	16	15	26	5	5.2	158488	101.2	1	21
c666	c666.a1	c666.a1.a1	Chassy_SC_4970;N1NYW0;P32843; Mitochondrial escape protein 2 - YME2	-60.8237	16	96.4	850	79		12		12	43	0.27907	0.901384	1.83721	1	18
d1303	d1303.a1	d1303.a1.a1	Chassy_SC_497;N1NX70;Q02908; Elongator complex protein 3 - ELP3	-17.3378	9	63.5	557	13		5		5	26	0.192308	0.557068	0.5	1	9
b24	b24.a1	b24.a1.a1	Chassy_SC_4969;N1NXP6;P02829; ATP-dependent molecular chaperone HSP82 - HSP82	-401.626	52	81.2	709	1284		50		66	31	2.12903	133.596	41.4194	1	21
c642	c642.a1	c642.a1.a1	Chassy_SC_4968;N1P5B8;P53128; Methylenetetrahydrofolate reductase 2 - MET13	-59.4802	16	68.4	600	85		7		8	23	0.347826	1.22754	3.69565	1	21
c839	c839.a1	c839.a1.a1	Chassy_SC_4967;N1P0K7;Q05029; Protein BCH1 - BCH1	-45.553	12	81.9	724	48		7		8	27	0.296296	0.978319	1.77778	1	14
c920	c920.a2	c920.a2.a1	Chassy_SC_4966;N1NX90;Q08985; Homocysteine S-methyltransferase 2 - SAM4	-6.86967	6	36.5	325	5	3	2	1	2	15	0.133333	0.359356	0.333333	1	3
d1411	d1411.a1	d1411.a1.a1	Chassy_SC_4965;N1P538;Q12331; FAS1 domain-containing protein YDR262W - YDR262W	-18.6339	18	30.5	272	10		3		3	16	0.1875	0.539927	0.625	1	4
c800	c800.a1	c800.a1.a1	Chassy_SC_4962;N1P9D3;P38787; 2-dehydropantoate 2-reductase - PAN5	-39.9772	22	42.7	379	53		8		8	23	0.347826	1.22754	2.30435	1	16
c654	c654.a1	c654.a1.a1	Chassy_SC_4961;N1P8X5;Q05359; Protein ERP1 - ERP1	-29.7945	27	24.6	219	81		5		6	8	0.75	4.62341	10.125	1	21
c368	c368.a1	c368.a1.a1	Chassy_SC_496;N1P3A5;P47079; T-complex protein 1 subunit theta - CCT8	-115.801	39	61.5	568	188	184	18	18	19	27	0.703704	4.0548	6.96296	1	21
d1875	d1875.a1	d1875.a1.a1	Chassy_SC_4959;N1P9L1;P32792; UPF0744 protein YSC83 - YSC83	-4.79588	2	44.2	385	2		1		1	18	0.0555556	0.136464	0.111111	1	2
d1856	d1856.a1	d1856.a1.a1	Chassy_SC_4958;N1P9N0;P38344; Cytoplasmic 60S subunit biogenesis factor REI1 - REI1	-3.34679	5	45.7	393	2		1		1	15	0.0666667	0.165914	0.133333	1	2
d1664	d1664.a1	d1664.a1.a1	Chassy_SC_4957;N1P8V9;P38149; Probable di- and tripeptidase DUG2 - DUG2	-13.3096	4	97.9	878	4		3		3	30	0.1	0.258925	0.133333	1	3
d1680	d1680.a1	d1680.a1.a1	Chassy_SC_4955;N1P4L7;P43577; Glucosamine 6-phosphate N-acetyltransferase - GNA1	-6.36653	9	18	159	4		1		1	11	0.0909091	0.232847	0.363636	1	4
d1565	d1565.a1	d1565.a1.a1	Chassy_SC_4954;N1P9U1;P18411; Protein FUN14 - FUN14	-6.79048	10	22	198	6		2		2	8	0.25	0.778279	0.75	1	5
d1398	d1398.a1	d1398.a1.a1	Chassy_SC_4953;N1P108;Q12133; Signal peptidase complex subunit SPC3 - SPC3	-9.65896	14	21.3	184	10		2		2	6	0.333333	1.15443	1.66667	1	8
c898	c898.a1	c898.a1.a1	Chassy_SC_4951;N1P172;(P0CX28-P0CX27);60S ribosomal protein L42- NA	-28.4256	30	12.1	106	41		5		5	3	1.66667	45.4159	13.6667	1	19
c196	c196.a1	c196.a1.a1	Chassy_SC_495;N1NZC2;P00175; Cytochrome b2, mitochondrial - CYB2	-155.355	48	65.4	591	342		22		32	23	1.3913	23.6209	14.8696	1	21
c322	c322.a1	c322.a1.a1	Chassy_SC_4947;N1P4I5;P15703; Glucan 1,3-beta-glucosidase - BGL2	-88.0915	45	34	313	228		10		12	9	1.33333	20.5443	25.3333	1	21
d1508	d1508.a1	d1508.a1.a1	Chassy_SC_4945;N1NYV9;Q03799; 37S ribosomal protein S8, mitochondrial - MRPS8	-7.00436	16	17.4	155	7		2		2	9	0.222222	0.668101	0.777778	1	7
d1623	d1623.a1	d1623.a1.a1	Chassy_SC_4943;N1P9M3;CENPK specific;No description in SC288c, annotation and gene name in CENPK: Dog2p -CENPK1137D_5440	-5.18046	10	21.2	193	5		2		2	8	0.25	0.778279	0.625	2	4
d1719	d1719.a1	d1719.a1.a1	Chassy_SC_4942;N1PAX6;P38121; DNA polymerase alpha subunit B - POL12	-7.13601	4	78.6	705	3		3		3	31	0.0967742	0.249609	0.0967742	1	2
c403	c403.a1	c403.a1.a1	Chassy_SC_4940;N1P9P7;P34223; UBX domain-containing protein 1 - SHP1	-91.0371	40	46.9	424	172		13		15	24	0.625	3.21697	7.16667	1	21
c988	c988.a1	c988.a1.a1	Chassy_SC_494;N1NZQ4;P28272; Dihydroorotate dehydrogenase (fumarate) - URA1	-14.0909	11	34.7	314	32		3		3	8	0.375	1.37137	4	1	18
b67	b67.a1	b67.a1.a1	Chassy_SC_4939;N1P3Z8;Q12122; Homocitrate synthase, mitochondrial - LYS21	-239.3	78	48.5	440	576	186	31	9	40	21	1.90476	79.3086	27.4286	1	21
d1286	d1286.a1	d1286.a1.a1	Chassy_SC_4938;N1P014;Q07914; Mitochondrial import inner membrane translocase subunit TIM14 - PAM18	-6.61979	8	17.8	168	14		1		1	3	0.333333	1.15443	4.66667	1	14
c668	c668.a1	c668.a1.a1	Chassy_SC_4935;N1NVJ5;P32795; Mitochondrial inner membrane i-AAA protease supercomplex subunit YME1 - YME1	-59.1552	16	81.6	747	79		11		11	31	0.354839	1.2638	2.54839	1	18
c640	c640.a1	c640.a1.a1	Chassy_SC_4933;N1NXL4;P53633; Prenylated Rab acceptor 1 - YIP3	-44.3295	37	19.3	176	85		7		7	7	1	9	12.1429	1	21
d1239	d1239.a1	d1239.a1.a1	Chassy_SC_4932;N1P586;P54860; E4 ubiquitin-protein ligase UFD2 - UFD2	-24.5627	7	109.7	961	16		6		6	38	0.157895	0.43845	0.421053	1	8
b11	b11.a2	b11.a2.a1	Chassy_SC_4931;N1P8N4;P09435; Heat shock protein SSA3 - SSA3	-322.182	56	70.4	649	853	350	38	23	49	20	2.45	280.838	42.65	1	21
c931	c931.a1	c931.a1.a1	Chassy_SC_4929;N1P3U4;P17891; Clathrin light chain - CLC1	-33.1031	28	26.4	233	38		7		7	11	0.636364	3.32876	3.45455	1	14
d1031	d1031.a1	d1031.a1.a1	Chassy_SC_4927;N1NYM3;Q03655; Probable 1,3-beta-glucanosyltransferase GAS3 - GAS3	-23.9064	7	56.7	524	28		3		3	20	0.15	0.412538	1.4	1	17
d1604	d1604.a1	d1604.a1.a1	Chassy_SC_4926;N1NXD0;P53898; Protein NSG2 - NSG2	-6.88306	7	33.6	299	5		2		2	10	0.2	0.584893	0.5	1	4
c982	c982.a1	c982.a1.a1	Chassy_SC_4922;N1NYP2;Q99297; Mitochondrial 2-oxodicarboxylate carrier 2 - ODC2	-20.6255	15	33.9	307	33		4		4	15	0.266667	0.84785	2.2	1	15
d1705	d1705.a1	d1705.a1.a1	Chassy_SC_4921;N1NZA4;P36102; PAN2-PAN3 deadenylation complex subunit PAN3 - PAN3	-3.31876	1	76.3	679	3		1		1	19	0.0526316	0.128838	0.157895	1	3
c424	c424.a2	c424.a2.a1	Chassy_SC_4919;N1NYJ4;P26570; Serine/threonine-protein phosphatase PP-Z1 - PPZ1	-19.2506	3	77.3	692	19	1	3	1	3	29	0.103448	0.268961	0.655172	1	15
c383	c383.a1	c383.a1.a1	Chassy_SC_4916;N1P4T9;P19262; Dihydrolipoyllysine-residue succinyltransferase component of 2-oxoglutarate dehydrogenase complex, mitochondrial - KGD2	-98.8046	39	50.3	463	185		12		14	18	0.777778	4.99484	10.2778	1	21
d1107	d1107.a1	d1107.a1.a1	Chassy_SC_4914;N1P8A9;P38286; Very-long-chain 3-oxoacyl-CoA reductase - IFA38	-22.9105	21	38.6	347	23		4		4	14	0.285714	0.930698	1.64286	1	14
c272	c272.a1	c272.a1.a1	Chassy_SC_4911;N1P0A4;P46680; Actin-interacting protein 1 - AIP1	-163.667	53	67.2	615	261		26		28	24	1.16667	13.678	10.875	1	21
d1512	d1512.a1	d1512.a1.a1	Chassy_SC_4910;N1NXP0;Q06090; 54S ribosomal protein L51, mitochondrial - MRPL51	-5.85824	15	16	140	7		2		2	7	0.285714	0.930698	1	1	7
c481	c481.a1	c481.a1.a1	Chassy_SC_491;N1NXL5;Q12074; Spermidine synthase - SPE3	-75.5323	51	33.2	293	141		10		11	12	0.916667	7.25404	11.75	1	21
c735	c735.a1	c735.a1.a1	Chassy_SC_4908;N1P5A4;Q01163; 37S ribosomal protein S23, mitochondrial - RSM23	-36.1978	27	50.7	450	63		11		11	26	0.423077	1.64897	2.42308	1	18
d1478	d1478.a1	d1478.a1.a1	Chassy_SC_4905;N1PAB9;Q07629; Uncharacterized membrane protein YDL218W - YDL218W	-23.8574	25	34.3	317	8		4		4	7	0.571429	2.72759	1.14286	1	5
d1812	d1812.a1	d1812.a1.a1	Chassy_SC_490;N1P4K6;P14682; Ubiquitin-conjugating enzyme E2-34 kDa - CDC34	-4.4437	3	34	295	2		1		1	6	0.166667	0.467799	0.333333	1	2
c608	c608.a1	c608.a1.a2	Chassy_SC_49;N1PAD0;P54854; Hexose transporter HXT15 - HXT15	-16.0721	1	62.8	567	91		2		2	16	0.125	0.333521	5.6875	2	21
c932	c932.a1	c932.a1.a1	Chassy_SC_4894;N1NY57;Q12452; 3-keto-steroid reductase - ERG27	-31.3351	19	39.6	347	38		7		7	17	0.411765	1.58086	2.23529	1	14
c703	c703.a1	c703.a1.a1	Chassy_SC_4891;N1P2B9;Q06489; Methylthioribose-1-phosphate isomerase - MRI1	-59.6634	32	44.9	411	72		10		10	17	0.588235	2.87468	4.23529	1	18
c816	c816.a1	c816.a1.a1	Chassy_SC_4887;N1P1I9;P11914; Mitochondrial-processing peptidase subunit alpha - MAS2	-30.049	16	53.2	482	51		8		8	23	0.347826	1.22754	2.21739	1	19
c972	c972.a1	c972.a1.a1	Chassy_SC_4886;N1P798;P32643; Trans-aconitate 3-methyltransferase - TMT1	-40.9552	32	34.7	299	34		8		8	15	0.533333	2.41455	2.26667	1	9
c466	c466.a1	c466.a1.a1	Chassy_SC_4885;N1P5T7;P07277; Mevalonate kinase - ERG12	-97.6799	45	48.3	443	146		14		16	15	1.06667	10.6591	9.73333	1	21
c174	c174.a1	c174.a1.a1	Chassy_SC_4883;N1NVM0;P06738; Glycogen phosphorylase - GPH1	-222.681	43	103.1	902	369		32		36	43	0.837209	5.874	8.5814	1	21
d1922	d1922.a1	d1922.a1.a1	Chassy_SC_4882;N1P063;P35201; Protein MIF2 - MIF2	-2.36653	1	62.3	549	1		1		1	21	0.047619	0.115884	0.047619	1	1
c767	c767.a1	c767.a1.a1	Chassy_SC_4881;N1PAF0;Q12443; Reticulon-like protein 2 - RTN2	-33.1673	19	44.2	393	58		6		7	19	0.368421	1.33572	3.05263	1	17
d1094	d1094.a1	d1094.a1.a1	Chassy_SC_488;N1PAX5;P38166; Protein transport protein SFT2 - SFT2	-13.1574	11	24.2	215	24		2		2	6	0.333333	1.15443	4	1	13
c955	c955.a1	c955.a1.a1	Chassy_SC_4874;N1P7Y5;P38217; Importin subunit beta-2 - KAP104	-18.3809	3	103.3	916	36		3		4	26	0.153846	0.425103	1.38462	1	17
c394	c394.a1	c394.a1.a1	Chassy_SC_4872;N1P3L3;Q3E757; 60S ribosomal protein L11-B - RPL11B	-51.2048	41	19.7	174	177		9		11	8	1.375	22.7137	22.125	1	21
d1257	d1257.a1	d1257.a1.a1	Chassy_SC_4870;N1NY36;P32802; Transmembrane 9 superfamily member 1 - EMP70	-13.6394	3	75.9	667	15		2		2	19	0.105263	0.274275	0.789474	1	14
d1414	d1414.a1	d1414.a1.a1	Chassy_SC_487;N1P9V8;P35180; Mitochondrial import receptor subunit TOM20 - TOM20	-11.957	14	20.2	183	10		2		2	6	0.333333	1.15443	1.66667	1	8
c223	c223.a1	c223.a1.a1	Chassy_SC_4869;N1PA85;P32481; Eukaryotic translation initiation factor 2 subunit gamma - GCD11	-161.445	47	57.7	527	317		22		27	21	1.28571	18.307	15.0952	1	21
d1085	d1085.a1	d1085.a1.a1	Chassy_SC_4868;N1P3F0;P39744; Nucleolar complex protein 2 - NOC2	-22.8007	8	81.5	710	24		5		5	33	0.151515	0.417474	0.727273	1	15
b51	b51.a1	b51.a1.a1	Chassy_SC_4863;N1PA00;P22137; Clathrin heavy chain - CHC1	-433.664	47	186.9	1653	784		64		72	81	0.888889	6.74264	9.67901	1	21
c636	c636.a1	c636.a1.a1	Chassy_SC_4862;N1NY73;Q04371; Protein-glutamate O-methyltransferase - YMR027W	-59.1624	25	54	470	86		10		10	24	0.416667	1.61016	3.58333	1	21
d1753	d1753.a1	d1753.a1.a1	Chassy_SC_4856;N1P405;P53262; V0 assembly protein 1 - VOA1	-9.18046	9	29.6	265	3		2		2	5	0.4	1.51189	0.6	1	2
d1321	d1321.a1	d1321.a1.a1	Chassy_SC_4851;N1P7U4;P25586; KRR1 small subunit processome component - KRR1	-6.37675	3	37	316	12		1		1	17	0.0588235	0.145048	0.705882	1	11
d1626	d1626.a1	d1626.a1.a1	Chassy_SC_4848;N1PAK2;P36973; Adenine phosphoribosyltransferase 2 - APT2	-3.50864	5	19.9	181	5		1		1	5	0.2	0.584893	1	1	5
b40	b40.a2	b40.a2.a1	Chassy_SC_4846;N1P8P8;CENPK specific;No description in SC288c, annotation and gene name in CENPK: Pyc2p -CENPK1137D_4774	-50.7461	56	19.6	178	98	61	10	7	10	9	1.11111	11.9155	10.8889	1	21
d1375	d1375.a1	d1375.a1.a1	Chassy_SC_4845;N1P4H8;P43561; Iron transport multicopper oxidase FET5 - FET5	-14.1675	7	70.7	622	11		4		4	20	0.2	0.584893	0.55	1	8
c912	c912.a1	c912.a1.a1	Chassy_SC_4842;N1P851;P36147; Presequence translocated-associated motor subunit PAM17, mitochondrial - PAM17	-25.8603	25	21.9	197	40		3		3	6	0.5	2.16228	6.66667	1	20
d1320	d1320.a1	d1320.a1.a1	Chassy_SC_4841;N1P626;Q03559; Uncharacterized protein YMR295C - YMR295C	-7.99654	20	22.1	197	12		2		2	1	2	99	12	1	11
d1617	d1617.a1	d1617.a1.a1	Chassy_SC_484;N1NY14;P23503; Cytosolic Fe-S cluster assembly factor NAR1 - NAR1	-11.1635	4	54	491	5		2		2	23	0.0869565	0.221677	0.217391	1	4
c379	c379.a1	c379.a1.a1	Chassy_SC_4838;N1P1N6;P07278; cAMP-dependent protein kinase regulatory subunit - BCY1	-110.614	57	47.1	416	186		18		19	19	1	9	9.78947	1	21
c760	c760.a1	c760.a1.a1	Chassy_SC_4837;N1NZ33;Q12496; Uncharacterized protein YOL098C - YOL098C	-56.135	13	118.2	1037	58		13		13	40	0.325	1.11349	1.45	1	18
d1458	d1458.a1	d1458.a1.a1	Chassy_SC_4836;N1NXY9;Q08959; Phosphatidylglycerol phospholipase C - PGC1	-3.76955	2	37	321	8		1		1	15	0.0666667	0.165914	0.533333	1	8
c999	c999.a1	c999.a1.a1	Chassy_SC_4835;N1NW93;P38688; Signal recognition particle subunit SRP72 - SRP72	-27.5882	11	73.4	640	31		7		7	25	0.28	0.905461	1.24	1	14
d1957	d1957.a1	d1957.a1.a1	Chassy_SC_4833;N1P9A9;P25358; Elongation of fatty acids protein 2 - ELO2	-2.63827	2	39.9	347	1		1		1	7	0.142857	0.389495	0.142857	1	1
d1245	d1245.a1	d1245.a1.a1	Chassy_SC_4832;N1P6R4;Q03976; 37S ribosomal protein S24, mitochondrial - RSM24	-12.0804	11	37.3	319	15		3		3	16	0.1875	0.539927	0.9375	1	13
c941	c941.a1	c941.a1.a1	Chassy_SC_483;N1NW71;P20435; DNA-directed RNA polymerases I, II, and III subunit RPABC2 - RPO26	-16.7399	16	17.8	155	37		2		2	5	0.4	1.51189	7.4	1	20
d1771	d1771.a1	d1771.a1.a1	Chassy_SC_4825;N1P1F8;P47083; U3 small nucleolar RNA-associated protein MPP10 - MPP10	-8.29243	3	66.8	593	3		1		1	25	0.04	0.0964782	0.12	1	2
c143	c143.a1	c143.a1.a1	Chassy_SC_4824;N1P987;P38998; Saccharopine dehydrogenase [NAD(+), L-lysine-forming] - LYS1	-173.098	68	41.3	373	416		19		27	17	1.58824	37.7468	24.4706	1	21
c255	c255.a1	c255.a1.a1	Chassy_SC_4820;N1P2C2;P53278; Uncharacterized protein YGR130C - YGR130C	-166.58	33	92.5	816	276		28		34	33	1.0303	9.72267	8.36364	1	21
d1338	d1338.a1	d1338.a1.a1	Chassy_SC_4818;N1NWU1;Q12314; Protein arginine N-methyltransferase SFM1 - SFM1	-16.9712	21	24.6	213	12		4		4	11	0.363636	1.31013	1.09091	1	9
c574	c574.a2	c574.a2.a1	Chassy_SC_4816;N1P0Y2;CENPK specific;No description in SC288c, annotation and gene name in CENPK: 40S ribosomal protein S21 -CENPK1137D_1066	-37.8571	55	9.7	87	88	10	5	1	8	6	1.33333	20.5443	14.6667	1	21
c115	c115.a1	c115.a1.a1	Chassy_SC_4811;N1P8C7;P38249; Eukaryotic translation initiation factor 3 subunit A - RPG1	-244.873	50	110.2	964	487		41		49	50	0.98	8.54993	9.74	1	21
c548	c548.a1	c548.a1.a1	Chassy_SC_481;N1NYJ6;P39926; Protein SSO2 - SSO2	-40.3032	26	33.6	295	90	74	6	5	7	9	0.777778	4.99484	10	1	21
d1181	d1181.a1	d1181.a1.a1	Chassy_SC_4809;N1P2B8;Q02629; Nucleoporin NUP100/NSP100 - NUP100	-22.2224	5	99.8	959	19		3		3	19	0.157895	0.43845	1	1	15
b16	b16.a1	b16.a1.a1	Chassy_SC_4808;N1P8W3;P00830; ATP synthase subunit beta, mitochondrial - ATP2	-402.839	85	54.7	511	1539		40		61	23	2.65217	447.925	66.913	1	21
d1643	d1643.a1	d1643.a1.a1	Chassy_SC_4807;N1P6X9;P17064; Purine-cytosine permease FCY2 - FCY2	-7.33536	4	58.1	533	4		2		2	6	0.333333	1.15443	0.666667	1	4
c994	c994.a1	c994.a1.a1	Chassy_SC_4806;N1P385;P27466; Calcium/calmodulin-dependent protein kinase I - CMK1	-50.7188	27	50.2	446	32		10		10	24	0.416667	1.61016	1.33333	1	9
d1466	d1466.a1	d1466.a1.a1	Chassy_SC_4804;N1P443;P40157; Vacuolar import and degradation protein 27 - VID27	-13.2467	7	88.7	782	8		5		5	35	0.142857	0.389495	0.228571	1	8
d1826	d1826.a1	d1826.a1.a1	Chassy_SC_4799;N1P9F3;P38251; Replication factor C subunit 5 - RFC5	-5.70465	7	39.8	354	2		2		2	18	0.111111	0.29155	0.111111	1	2
d1531	d1531.a1	d1531.a1.a1	Chassy_SC_4787;N1P5G2;P33331; Nuclear transport factor 2 - NTF2	-4.0655	6	14.4	125	7		1		1	3	0.333333	1.15443	2.33333	1	7
d1591	d1591.a1	d1591.a1.a1	Chassy_SC_4783;N1P5X0;P53276; U3 small nucleolar RNA-associated protein 8 - UTP8	-12.4003	5	80	713	6		3		3	33	0.0909091	0.232847	0.181818	1	6
c227	c227.a1	c227.a1.a1	Chassy_SC_4782;N1NXM1;Q05022; rRNA biogenesis protein RRP5 - RRP5	-225.825	30	192.8	1729	316		39		40	86	0.465116	1.91821	3.67442	1	21
c799	c799.a1	c799.a1.a1	Chassy_SC_4778;N1NYN1;P54000; RNA polymerase II transcriptional coactivator SUB1 - SUB1	-44.9675	32	33	292	53		7		8	13	0.615385	3.12463	4.07692	1	15
d1973	d1973.a1	d1973.a1.a1	Chassy_SC_4771;N1P7H4;P11433; Cell division control protein 24 - CDC24	-2.69897	1	96.8	854	1		1		1	42	0.0238095	0.0563541	0.0238095	1	1
d1276	d1276.a1	d1276.a1.a1	Chassy_SC_4770;N1P235;P53224; Protein ORM1 - ORM1	-8.41454	12	25.1	222	14		2		2	5	0.4	1.51189	2.8	1	14
c211	c211.a1	c211.a1.a1	Chassy_SC_477;N1P9T9;P31373; Cystathionine gamma-lyase - CYS3	-158.637	79	42.4	394	331		18		24	11	2.18182	150.991	30.0909	1	21
c530	c530.a1	c530.a1.a1	Chassy_SC_4769;N1NYJ0;Q99287; Protein SEY1 - SEY1	-55.5161	18	89.3	776	119		13		13	42	0.309524	1.0395	2.83333	1	21
d1953	d1953.a1	d1953.a1.a1	Chassy_SC_4765;N1P8N5;P47104; Regulator of V-ATPase in vacuolar membrane protein 1 - RAV1	-6.42022	1	154.7	1357	1		1		1	65	0.0153846	0.0360593	0.0153846	1	1
a3	a3.a1	a3.a1.a1	Chassy_SC_4763;N1P8G0;P02994; Elongation factor 1-alpha - TEF1	-465.117	68	49.9	458	2692		55		87	15	5.8	630956	179.467	1	21
d1132	d1132.a1	d1132.a1.a1	Chassy_SC_4761;N1P1Z9;P43639; Casein kinase II subunit beta - CKB1	-17.4517	12	32.2	278	22		3		3	11	0.272727	0.873817	2	1	13
c844	c844.a1	c844.a1.a1	Chassy_SC_4760;N1NVJ4;Q12233; ATP synthase subunit g, mitochondrial - ATP20	-27.734	41	12.8	115	47		4		5	6	0.833333	5.81292	7.83333	1	19
b60	b60.a1	b60.a1.a1	Chassy_SC_4758;N1P674;Q00055; Glycerol-3-phosphate dehydrogenase [NAD(+)] 1 - GPD1	-199.168	61	42.8	391	520	487	23	22	33	14	2.35714	226.585	37.1429	1	21
c822	c822.a1	c822.a1.a1	Chassy_SC_4755;N1P601;P41920; Ran-specific GTPase-activating protein 1 - YRB1	-29.2451	24	22.9	201	50		4		5	4	1.25	16.7828	12.5	1	17
d2006	d2006.a1	d2006.a1.a1	Chassy_SC_4754;N1P9Z0;P53309; Clathrin coat assembly protein AP180B - YAP1802	-3.69897	2	64.2	568	1		1		1	15	0.0666667	0.165914	0.0666667	1	1
d1877	d1877.a1	d1877.a1.a1	Chassy_SC_4752;N1P9Y8;P17442; Phosphate system positive regulatory protein PHO81 - PHO81	-4.79588	1	133.8	1178	2		1		1	52	0.0192308	0.0452755	0.0384615	1	2
a2	a2.a1	a2.a1.a1	Chassy_SC_4750;N1NZ13;P46367; Potassium-activated aldehyde dehydrogenase, mitochondrial - ALD4	-597.367	83	56.6	519	2470	2420	66	63	89	23	3.86957	7404.68	107.391	1	21
d1899	d1899.a1	d1899.a1.a1	Chassy_SC_4749;N1NXT7;P53739; Flippase kinase 1 - FPK1	-2.88606	1	100.4	893	1		1		1	32	0.03125	0.0746078	0.03125	1	1
c975	c975.a1	c975.a1.a1	Chassy_SC_4748;N1P992;CENPK specific;No description in SC288c, annotation and gene name in CENPK: Leu2p -CENPK1137D_4480	-17.7065	29	14	125	34		3		4	3	1.33333	20.5443	11.3333	1	13
d1451	d1451.a1	d1451.a1.a1	Chassy_SC_4743;N1P5I3;P53173; ER-derived vesicles protein ERV14 - ERV14	-2.92082	7	15.8	138	9		1		1	3	0.333333	1.15443	3	1	9
c300	c300.a1	c300.a1.a1	Chassy_SC_4738;N1P1A6;Q03558; NADPH dehydrogenase 2 - OYE2	-174.726	69	44.9	400	205	195	24	22	30	16	1.875	73.9894	12.8125	1	21
d1984	d1984.a1	d1984.a1.a1	Chassy_SC_4734;N1NXW2;P53753; Endo-1,3(4)-beta-glucanase 1 - DSE4	-2.65758	1	120.9	1117	1		1		1	24	0.0416667	0.100694	0.0416667	1	1
c212	c212.a1	c212.a1.a1	Chassy_SC_4731;N1P068;Q05050; Eisosome protein 1 - EIS1	-205.809	43	93.2	843	329		34		39	43	0.906977	7.07192	7.65116	1	21
c684	c684.a1	c684.a1.a1	Chassy_SC_4726;N1P638;P22803; Thioredoxin-2 - TRX2	-30.1088	45	11.1	104	60	44	4	3	4	7	0.571429	2.72759	8.57143	1	18
d1472	d1472.a1	d1472.a1.a1	Chassy_SC_4715;N1NVL9;Q06449; [PSI+] inducibility protein 3 - PIN3	-16.3809	18	23.4	215	8		4		4	8	0.5	2.16228	1	1	5
c357	c357.a1	c357.a1.a1	Chassy_SC_4714;N1P814;P25349; Flavoprotein-like protein YCP4 - YCP4	-90.0528	67	26.3	247	201		10		12	11	1.09091	11.3285	18.2727	1	21
c621	c621.a1	c621.a1.a1	Chassy_SC_4713;N1P801;CENPK specific;No description in SC288c, annotation and gene name in CENPK: Leu2p -CENPK1137D_4479	-51.6655	73	8.8	85	90		5		7	2	3.5	3161.28	45	1	21
c467	c467.a1	c467.a1.a1	Chassy_SC_4712;N1P2D5;P35732; RNA polymerase II degradation factor 1 - DEF1	-113.711	26	83.8	738	145		15		15	9	1.66667	45.4159	16.1111	1	21
c165	c165.a1	c165.a1.a1	Chassy_SC_4707;N1P9C5;P38219; Obg-like ATPase 1 - OLA1	-163.6	65	44.1	394	382		23		29	20	1.45	27.1838	19.1	1	21
d1409	d1409.a1	d1409.a1.a1	Chassy_SC_4700;N1PA90;P52891; Nucleoporin NUP84 - NUP84	-14.117	9	83.5	726	10		4		4	31	0.129032	0.34596	0.322581	1	6
d1077	d1077.a1	d1077.a1.a1	Chassy_SC_47;N1P5E5;P53145; Large subunit GTPase 1 - LSG1	-26.4881	7	72.6	640	25		3		3	31	0.0967742	0.249609	0.806452	1	15
d1111	d1111.a1	d1111.a1.a1	Chassy_SC_4698;N1P358;P47045; Mitochondrial import inner membrane translocase subunit TIM54 - TIM54	-21.4244	13	54.1	478	23		4		4	23	0.173913	0.492496	1	1	12
c772	c772.a1	c772.a1.a1	Chassy_SC_4697;N1P2P9;P28007; H/ACA ribonucleoprotein complex subunit 1 - GAR1	-40.3173	21	21.4	205	58		4		4	4	1	9	14.5	1	18
d1729	d1729.a1	d1729.a1.a1	Chassy_SC_4692;N1NXX5;P32462; Delta(14)-sterol reductase - ERG24	-4.76955	2	50.5	438	3		1		1	9	0.111111	0.29155	0.333333	1	3
c213	c213.a1	c213.a1.a1	Chassy_SC_4691;N1P6H0;P22855; Alpha-mannosidase - AMS1	-186.839	32	124.2	1083	328		34		34	57	0.596491	2.94904	5.75439	1	21
d1707	d1707.a1	d1707.a1.a1	Chassy_SC_4688;N1P3Y4;P52871; Protein transport protein SBH2 - SBH2	-4.16115	14	9.5	88	3		1		1	3	0.333333	1.15443	1	1	3
c271	c271.a1	c271.a1.a1	Chassy_SC_4685;N1P145;P47117; Actin-related protein 3 - ARP3	-135.159	49	49.4	449	262		17		18	15	1.2	14.8489	17.4667	1	21
d2046	d2046.a1	d2046.a1.a1	Chassy_SC_4684;N1P025;Q06479;|reversed F-box protein YLR352W - YLR352W	-2.01323	1	93.1	807	1		1		1	33	0.030303	0.0722672	0.030303	1	1
c696	c696.a1	c696.a1.a1	Chassy_SC_4683;N1NWA5;P38996; Nuclear polyadenylated RNA-binding protein 3 - NAB3	-30.9081	7	90.3	802	73		7		7	19	0.368421	1.33572	3.84211	1	21
b71	b71.a2	b71.a2.a1	Chassy_SC_4682;N1P675;P23248; 40S ribosomal protein S1-B - RPS1B	-217.607	68	28.7	255	553	91	28	7	40	14	2.85714	718.686	39.5	1	21
d1816	d1816.a1	d1816.a1.a1	Chassy_SC_4681;N1P4V6;P38869; Protein SVP26 - SVP26	-3.55284	3	26.2	228	2		1		1	7	0.142857	0.389495	0.285714	1	2
c616	c616.a1	c616.a1.a1	Chassy_SC_4680;N1P029;P00044; Cytochrome c iso-1 - CYC1	-58.7378	41	12.1	109	90		6		9	5	1.8	62.0957	18	1	20
c310	c310.a1	c310.a1.a1	Chassy_SC_4679;N1P8Z5;P28274; CTP synthase 1 - URA7	-98.4879	35	64.6	579	155	116	14	11	15	27	0.555556	2.59381	5.74074	1	21
c437	c437.a1	c437.a1.a1	Chassy_SC_4678;N1P9L5;P17423; Homoserine kinase - THR1	-70.5538	39	38.6	357	158		11		13	12	1.08333	11.1153	13.1667	1	21
d1847	d1847.a1	d1847.a1.a1	Chassy_SC_4677;N1P7W1;P36090; Uncharacterized protein ANR2 - ANR2	-5.35655	3	58.8	516	2		1		1	28	0.0357143	0.0857111	0.0714286	1	2
d1509	d1509.a1	d1509.a1.a1	Chassy_SC_4676;N1P445;Q05166; Nucleoporin ASM4 - ASM4	-5.79588	3	58.7	528	7		2		2	15	0.133333	0.359356	0.466667	1	7
c968	c968.a2	c968.a2.a1	Chassy_SC_4675;N1NVZ4;P17157; Cyclin-dependent protein kinase PHO85 - PHO85	-5.38091	6	34.8	305	5	1	2	1	3	18	0.166667	0.467799	0.277778	1	5
d1101	d1101.a1	d1101.a1.a1	Chassy_SC_4652;N1PAI8;Q06385; Vacuolar protein sorting-associated protein 74 - VPS74	-15.9557	13	39.2	345	23		5		5	13	0.384615	1.42446	1.76923	1	15
d1115	d1115.a1	d1115.a1.a1	Chassy_SC_465;N1P9X9;P53301; Probable glycosidase CRH1 - CRH1	-17.9252	8	52.6	507	22		3		3	16	0.1875	0.539927	1.375	1	10
c298	c298.a2	c298.a2.a1	Chassy_SC_4647;N1P2R5;P38816; Thioredoxin reductase 2, mitochondrial - TRR2	-52.2306	26	37	342	60	11	5	2	6	9	0.666667	3.64159	6.66667	1	15
d2073	d2073.a1	d2073.a1.a1	Chassy_SC_4646;N1P1U8;Q02725;|reversed Vacuolar transporter chaperone 3 - VTC3	-2.40894	2	96.3	835	1		1		1	37	0.027027	0.0642092	0.027027	1	1
d1237	d1237.a1	d1237.a1.a1	Chassy_SC_4645;N1NXK3;P53946; Actin-related protein 5 - ARP5	-21.0415	4	87.4	755	16		3		3	24	0.125	0.333521	0.666667	1	11
c217	c217.a1	c217.a1.a1	Chassy_SC_4644;N1P4R7;P43616; Cys-Gly metallodipeptidase DUG1 - DUG1	-185.736	58	52.7	481	325		22		25	16	1.5625	35.5174	20.3125	1	21
c435	c435.a1	c435.a1.a1	Chassy_SC_4643;N1P3Y8;P06115; Catalase T - CTT1	-144.032	44	64.4	562	158		21		24	25	0.96	8.12011	6.32	1	16
d1962	d1962.a1	d1962.a1.a1	Chassy_SC_4642;N1P0L0;P35724; Manganese resistance protein MNR2 - MNR2	-3.63827	1	109.5	969	1		1		1	29	0.0344828	0.0826367	0.0344828	1	1
d1779	d1779.a1	d1779.a1.a1	Chassy_SC_4641;N1NWJ5;P28000; DNA-directed RNA polymerases I and III subunit RPAC2 - RPC19	-2.85387	7	16.1	142	2		1		1	5	0.2	0.584893	0.4	1	2
d1519	d1519.a1	d1519.a1.a1	Chassy_SC_4640;N1P8K5;P38288; Protein TOS1 - TOS1	-7.87484	8	47.9	455	7		2		2	9	0.222222	0.668101	0.777778	1	5
d1212	d1212.a1	d1212.a1.a1	Chassy_SC_4639;N1P2T7;P18962; Dipeptidyl aminopeptidase B - DAP2	-24.3255	6	93.2	818	17		5		5	34	0.147059	0.403004	0.5	1	10
c936	c936.a1	c936.a1.a1	Chassy_SC_4638;N1P193;P80428; Actin-related protein 4 - ARP4	-45.4302	22	54.7	489	38		9		9	18	0.5	2.16228	2.11111	1	12
d1761	d1761.a1	d1761.a1.a1	Chassy_SC_4635;N1P2Y9;P53121; Putative flavin carrier protein 3 - FLC3	-3.3098	1	90.6	802	3		1		1	18	0.0555556	0.136464	0.166667	1	3
d1895	d1895.a1	d1895.a1.a1	Chassy_SC_4633;N1P4H6;P53329;|reversed Uncharacterized protein YGR273C - YGR273C	-2.37675	4	19.9	174	1		1		1	6	0.166667	0.467799	0.166667	1	1
d1927	d1927.a1	d1927.a1.a1	Chassy_SC_4632;N1P751;P40078; Ribosome biogenesis protein NSA2 - NSA2	-2.00436	3	29.6	261	1		1		1	9	0.111111	0.29155	0.111111	1	1
d1866	d1866.a1	d1866.a1.a2	Chassy_SC_4628;N1NWB8;Q08224; Hydroxymethylpyrimidine/phosphomethylpyrimidine kinase THI20 - THI20	-6.74473	3	61.1	551	2		1		1	26	0.0384615	0.0926009	0.0769231	2	2
d1479	d1479.a1	d1479.a1.a1	Chassy_SC_4627;N1NW22;Q02931; NET1-associated nuclear protein 1 - NAN1	-11.5616	4	101.1	896	8		4		4	30	0.133333	0.359356	0.266667	1	6
d1396	d1396.a1	d1396.a1.a1	Chassy_SC_4626;N1P5U8;Q12306; Ubiquitin-like protein SMT3 - SMT3	-7.6073	17	11.5	101	10		2		2	5	0.4	1.51189	2	1	8
c502	c502.a1	c502.a1.a1	Chassy_SC_4625;N1PA44;P21524; Ribonucleoside-diphosphate reductase large chain 1 - RNR1	-87.482	16	99.4	888	131		12		12	41	0.292683	0.961927	3.19512	1	21
d1974	d1974.a1	d1974.a1.a1	Chassy_SC_4624;N1P8X1;P47164; Cystathionine gamma-synthase - STR2	-2.00436	1	72.2	639	1		1		1	27	0.037037	0.089023	0.037037	1	1
d1258	d1258.a1	d1258.a1.a1	Chassy_SC_4623;N1P749;P38144; ISWI chromatin-remodeling complex ATPase ISW1 - ISW1	-15.9069	4	123.7	1069	15		5		5	59	0.0847458	0.215474	0.254237	1	11
c894	c894.a1	c894.a1.a1	Chassy_SC_4618;N1P9B2;P40485; Phosphatidylinositol 4,5-bisphosphate-binding protein SLM1 - SLM1	-48.3433	17	77.2	680	42		8		8	21	0.380952	1.4041	2	1	19
d1511	d1511.a1	d1511.a1.a1	Chassy_SC_4615;N1NZ78;P35729; Nucleoporin NUP120 - NUP120	-6.42366	2	120.2	1037	7		2		2	39	0.0512821	0.125336	0.179487	1	5
c857	c857.a1	c857.a1.a1	Chassy_SC_4614;N1P5L4;P03962; Orotidine 5'-phosphate decarboxylase - URA3	-42.5492	38	29.2	267	46		8		8	17	0.470588	1.95521	2.70588	1	12
c300	c300.a2	c300.a2.a1	Chassy_SC_4611;N1P1D3;P41816; NADPH dehydrogenase 3 - OYE3	-81.352	33	44.8	400	46	36	14	12	15	15	1	9	3.06667	1	11
c103	c103.a2	c103.a2.a1	Chassy_SC_4609;N1P131;P19211; Eukaryotic translation initiation factor 5A-2 - ANB1	-27.6127	36	17	157	35	10	5	4	7	5	1.4	24.1189	7	1	21
d1363	d1363.a1	d1363.a1.a1	Chassy_SC_4608;N1P796;Q05933; Actin-related protein 2/3 complex subunit 3 - ARC18	-14.9486	29	20.5	178	11		5		5	8	0.625	3.21697	1.375	1	8
c786	c786.a1	c786.a1.a1	Chassy_SC_4607;N1NXJ8;P32352; C-8 sterol isomerase - ERG2	-29.4692	22	24.8	222	55		5		6	4	1.5	30.6228	13.75	1	21
c649	c649.a1	c649.a1.a1	Chassy_SC_4605;N1P7N5;P33775; Dolichyl-phosphate-mannose--protein mannosyltransferase 1 - PMT1	-52.6703	13	92.5	817	82		7		8	26	0.307692	1.03092	3.15385	1	21
d1657	d1657.a1	d1657.a1.a1	Chassy_SC_4604;N1P5S8;P23369; 54S ribosomal protein L25, mitochondrial - MRPL25	-13.1619	18	18.5	157	4		3		3	6	0.5	2.16228	0.666667	1	2
d1304	d1304.a1	d1304.a1.a1	Chassy_SC_4603;N1NXP7;P33309; Protein DOM34 - DOM34	-21.7277	8	43.9	386	13		2		2	16	0.125	0.333521	0.8125	1	10
c417	c417.a1	c417.a1.a1	Chassy_SC_4602;N1NWX8;P53839; Glyoxylate reductase 1 - GOR1	-123.022	72	38.7	350	168		19		22	13	1.69231	48.2388	12.9231	1	21
c739	c739.a1	c739.a1.a1	Chassy_SC_4601;N1P7X1;Q12165; ATP synthase subunit delta, mitochondrial - ATP16	-54.91	56	16.9	160	63		5		5	3	1.66667	45.4159	21	1	15
d1059	d1059.a1	d1059.a1.a1	Chassy_SC_4596;N1P314;P06785; Thymidylate synthase - CDC21	-15.2437	14	34.9	304	26		4		4	13	0.307692	1.03092	2	1	15
d1452	d1452.a1	d1452.a1.a1	Chassy_SC_4594;N1P2D7;P13856; Ras-related protein RSR1 - RSR1	-6.61979	4	30.3	272	9		1		1	15	0.0666667	0.165914	0.6	1	9
d2001	d2001.a1	d2001.a1.a1	Chassy_SC_4592;N1P8I9;P43638; MAP-homologous protein 1 - MHP1	-2.36653	1	155	1398	1		1		1	58	0.0172414	0.0404983	0.0172414	1	1
d1906	d1906.a1	d1906.a1.a1	Chassy_SC_4591;N1NWC3;Q08217;|reversed Serine/threonine-protein kinase PSK2 - PSK2	-3.55284	0	124.2	1101	1		1		1	51	0.0196078	0.0461834	0.0196078	1	1
b44	b44.a1	b44.a1.a1	Chassy_SC_4588;N1NY19;P37291; Serine hydroxymethyltransferase, cytosolic - SHM2	-257.341	70	52.1	469	608	606	38	37	48	24	2	99	25.3333	1	21
c239	c239.a1	c239.a1.a1	Chassy_SC_4584;N1NX01;P28241; Isocitrate dehydrogenase [NAD] subunit 2, mitochondrial - IDH2	-151.007	67	39.6	369	297		17		21	10	2.1	124.893	29.7	1	21
d1467	d1467.a1	d1467.a1.a1	Chassy_SC_4583;N1P113;P38789; Ribosome biogenesis protein SSF1 - SSF1	-7.18977	6	51.6	453	8		2		2	18	0.111111	0.29155	0.444444	1	7
d1593	d1593.a1	d1593.a1.a1	Chassy_SC_458;N1P594;P39945; Protein AST2 - AST2	-3.85387	3	48.2	430	6		1		1	19	0.0526316	0.128838	0.315789	1	4
c422	c422.a1	c422.a1.a1	Chassy_SC_4579;N1P5T3;P23644; Mitochondrial import receptor subunit TOM40 - TOM40	-103.396	52	41.9	387	167		12		15	11	1.36364	22.1013	15.1818	1	21
d1874	d1874.a1	d1874.a1.a1	Chassy_SC_4578;N1P0T9;P40469; DNA repair/transcription protein MET18/MMS19 - MET18	-5.17393	1	117.6	1032	2		1		1	52	0.0192308	0.0452755	0.0384615	1	2
c120	c120.a1	c120.a1.a1	Chassy_SC_4574;N1P5K3;P00931; Tryptophan synthase - TRP5	-247.506	61	76.5	707	480		35		41	32	1.28125	18.1095	15	1	21
c142	c142.a1	c142.a1.a1	Chassy_SC_4572;N1P5G7;P39518; Long-chain-fatty-acid--CoA ligase 2 - FAA2	-240.003	48	83.3	744	421		27		33	33	1	9	12.7576	1	21
c889	c889.a1	c889.a1.a1	Chassy_SC_4571;N1P348;P32902; 37S ribosomal protein MRP4, mitochondrial - MRP4	-44.4478	32	44.1	394	43		9		9	18	0.5	2.16228	2.38889	1	11
c130	c130.a1	c130.a1.a1	Chassy_SC_4570;N1NYL3;Q03690; Clustered mitochondria protein 1 - CLU1	-243.391	43	144.9	1277	438		37		43	55	0.781818	5.05088	7.96364	1	21
d1124	d1124.a1	d1124.a1.a1	Chassy_SC_4568;N1NZD6;Q03705; EKC/KEOPS complex subunit CGI121 - CGI121	-16.9484	26	20.6	181	22		4		4	12	0.333333	1.15443	1.83333	1	13
d1159	d1159.a1	d1159.a1.a1	Chassy_SC_4567;N1P7V6;Q12008; Phosphoglycerate mutase 2 - GPM2	-11.7983	8	36	311	20		3		3	18	0.166667	0.467799	1.11111	1	11
d1073	d1073.a1	d1073.a1.a1	Chassy_SC_4565;N1P254;P53045; Methylsterol monooxygenase - ERG25	-13.7986	9	36.4	309	25		2		2	7	0.285714	0.930698	3.57143	1	11
[truncated: 1,600 more rows]

## Sheet: peptides
Supporting information File S-1. X!Tandempipeline results of the identified proteins
[truncated: 20,105 more rows]
